# Supplementary material for: VLA-4 suppression by senescence signals regulates meningeal immunity and leptomeningeal metastasis
Source: eLife journal article supplement (doi:10.7554/elife.83272), 2022-12-09
Supplement: supp [file Group.xlsx]

## Sheet: Sheet1
Sample	Group
Inter1	Inter
Inter2	Inter
Inter3	Inter
LM_phenotype1	LM_phenotype
LM_phenotype2	LM_phenotype
LM_phenotype3	LM_phenotype
Parental1	Parental
Parental2	Parental
Parental3	Parental
