# Supplementary material for: VLA-4 suppression by senescence signals regulates meningeal immunity and leptomeningeal metastasis
Source: eLife journal article supplement (doi:10.7554/elife.83272), 2022-12-09
Supplement: supp [file PCA datasets.xlsx]

## Sheet: Sheet1
gene_id	Inter1	Inter2	Inter3	LM_phenotype1	LM_phenotype2	LM_phenotype3	Parental1	Parental2	Parental3
ENSMUSG00000098650	0.007871	0.000482	0	0.004496	0.012804	0.009651	28.4449	22.6544	19.1231
ENSMUSG00000026600	23.779	25.7676	26.5516	24.0817	25.0889	27.8548	0.500505	0.477872	0.588603
ENSMUSG00000063727	245.4	231.863	232.042	435.956	421.542	415.976	4.40953	4.35196	4.90971
ENSMUSG00000035818	54.1459	53.8932	51.0657	77.0313	71.4457	70.898	1.0944	0.800145	1.3324
ENSMUSG00000047501	132.885	142.374	139.905	268.507	283.591	285.097	2.64181	1.73663	3.0951
ENSMUSG00000024401	17.4427	14.6992	14.877	23.5673	20.8015	20.6936	0	0	0.072631
ENSMUSG00000037033	13.6721	14.4524	13.6973	9.8776	8.14327	9.09042	0.030951	0.01165	0.087083
ENSMUSG00000018623	25.3599	19.5942	22.8808	12.5411	10.812	11.4789	0	0	0
ENSMUSG00000028217	37.4192	34.7091	36.1923	18.9602	16.7082	16.1602	1.29781	1.50302	1.79793
ENSMUSG00000023011	26.9251	29.4199	26.0789	29.6725	31.1343	30.1815	0.574371	0.375759	0.761224
ENSMUSG00000026475	30.3384	26.7064	29.3811	26.2064	26.9887	26.7969	1.36282	1.26937	1.53769
ENSMUSG00000022464	13.4502	13.1779	13.8627	15.46	14.0857	14.1068	104.008	111.426	99.521
ENSMUSG00000020256	0.175964	0.319428	0.287638	0.514957	0.536551	0.764352	7.80033	8.71263	9.92524
ENSMUSG00000023951	6.44593	6.21946	6.18793	11.3414	11.6933	12.0458	58.5096	53.2895	57.2336
ENSMUSG00000031375	40.3388	45.7108	43.6535	52.4001	52.3446	52.8106	0.833648	0.563516	1.36634
ENSMUSG00000028542	0.428661	0.406029	0.30246	1.40621	2.02713	1.89128	10.0978	11.2581	15.1161
ENSMUSG00000019734	18.34	18.4211	16.4873	21.1089	20.9492	21.6133	1.08221	1.62546	1.10894
ENSMUSG00000027313	0.965718	1.15614	0.922852	12.1141	13.7043	12.6769	24.487	24.8955	21.8835
ENSMUSG00000032715	8.12681	8.28447	8.88548	20.4177	22.9332	23.4839	88.755	97.9981	73.0861
ENSMUSG00000024600	5.39216	4.77421	5.48384	4.7871	4.8422	5.27179	0	0	0.035833
ENSMUSG00000015766	10.3927	10.8308	11.2751	9.80211	9.61136	10.3475	0.491101	0.605515	0.890832
ENSMUSG00000004891	20.3754	26.2686	30.2468	21.5876	28.34	27.1893	0.194338	0.37282	0.58458
ENSMUSG00000020774	13.1783	12.653	11.5425	14.3974	13.8211	13.1958	1.16305	0.933166	1.32324
ENSMUSG00000045165	11.8602	11.9164	12.2832	17.3493	13.0041	13.8866	0.481391	0.395063	0.629141
ENSMUSG00000063975	7.18245	6.51959	5.5222	4.74202	3.46708	3.9263	0.130522	0.074755	0.0716854
ENSMUSG00000025432	58.0603	66.4113	64.4638	100.331	107.99	108.944	9.96058	11.2335	12.2276
ENSMUSG00000021831	16.525	15.4135	15.1383	16.3727	15.3804	14.58	80.1236	83.0315	75.7248
ENSMUSG00000112400	15.8525	14.978	12.2765	15.1747	13.2033	9.5705	0	0	0.078807
ENSMUSG00000006777	28.2062	25.0137	24.0426	24.334	24.2786	22.2363	0.606757	1.22973	1.29443
ENSMUSG00000005125	11.0005	10.618	10.1113	17.1788	17.438	17.4634	62.9115	61.6242	70.9819
ENSMUSG00000000120	0.718669	0.465083	0.655725	5.3616	5.35777	5.87821	0.035378	0.012343	0.065037
ENSMUSG00000041449	7.00687	6.05115	6.38392	5.87261	4.60784	4.70239	0	0	0
ENSMUSG00000024769	17.3031	22.6519	21.9106	18.5078	24.6042	24.6489	1.64277	2.08586	2.36389
ENSMUSG00000030717	3.71095	2.06997	4.32896	12.3905	10.1697	11.8317	58.1567	48.8401	54.3286
ENSMUSG00000000544	11.6026	14.2304	12.8696	23.8696	23.849	24.1861	1.47502	1.44842	2.22612
ENSMUSG00000025075	46.028	61.111	50.0549	33.3491	32.6255	40.8534	4.3678	4.83338	6.12035
ENSMUSG00000078566	14.5642	8.59762	11.8351	13.3088	12.0495	11.1171	128.025	98.7337	74.6163
ENSMUSG00000051314	6.38444	6.4097	4.32238	2.95906	4.97933	4.46532	0.0406524	0	0
ENSMUSG00000034917	9.02353	10.6979	10.1477	10.3026	11.1075	12.1633	0.952105	1.2005	1.20191
ENSMUSG00000002489	1.92872	2.03817	2.36357	4.54882	5.22962	4.51699	0.35286	0.362579	0.245385
ENSMUSG00000115737	2.68809	2.44968	2.72723	3.93824	2.90154	2.26344	0	0	0.00558384
ENSMUSG00000026483	3.24271	3.67485	3.27468	2.65338	2.90053	3.11587	13.8275	16.7446	17.6307
ENSMUSG00000020467	12.3052	10.8317	9.26423	11.3109	10.0515	10.5215	0.201947	0.238283	0.481546
ENSMUSG00000038393	34.2469	33.6414	36.4804	103.431	119.64	103.94	308.267	382.209	291.034
ENSMUSG00000041722	43.5443	31.0741	30.8403	42.6845	36.617	32.9756	2.97844	2.89664	1.82053
ENSMUSG00000027562	186.769	173.055	166.768	202.893	186.762	188.988	28.8242	26.5978	22.3506
ENSMUSG00000067750	101.693	75.6717	88.6114	103.702	93.9152	92.9184	10.3972	8.05893	5.31342
ENSMUSG00000021553	6.10792	7.58987	7.2502	4.53786	4.28787	4.34798	0.188668	0.449328	0.298469
ENSMUSG00000038539	18.5117	14.7408	14.6058	25.1479	23.0064	24.9347	96.8659	93.3842	81.4279
ENSMUSG00000021453	9.00997	6.94525	7.54681	14.0982	14.7184	13.3125	70.83	67.3825	49.732
ENSMUSG00000058258	16.9225	14.7263	9.20312	8.0587	7.42103	7.75336	0.568713	0.854864	0.696519
ENSMUSG00000025007	8.93619	8.88983	8.97264	15.9258	15.7953	18.6643	46.7275	47.9171	49.7489
ENSMUSG00000068874	0.269295	0.337358	0.590944	0.587999	0.538217	0.751802	9.97043	8.72762	8.58305
ENSMUSG00000079428	6.3467	4.24855	5.12448	6.32516	5.00788	3.98029	48.9077	34.176	44.3449
ENSMUSG00000047730	5.51074	8.05509	8.19082	4.79468	6.52185	6.44255	0.407706	0.657709	0.513637
ENSMUSG00000054342	11.1387	11.6181	11.9844	15.951	17.6433	17.0106	2.55574	1.98238	2.37539
ENSMUSG00000053113	6.75739	6.55483	6.21614	7.47123	8.09056	7.61824	30.5267	31.7509	33.3375
ENSMUSG00000038463	9.76091	11.2173	12.0312	3.7751	3.03124	4.0015	0.834925	0.769237	0.991697
ENSMUSG00000033032	6.51455	8.55299	7.26706	9.73743	11.3894	11.7299	0.715596	1.05729	1.00622
ENSMUSG00000038264	8.7548	8.51047	7.79398	13.7415	13.5298	14.1121	1.42696	1.81276	1.62892
ENSMUSG00000013418	0.268086	0.158417	0.115289	0.364373	0.295018	0.410262	6.04127	7.60906	8.47016
ENSMUSG00000024968	1.1459	1.73612	1.29092	1.41204	1.45676	1.17292	10.5541	10.363	13.9185
ENSMUSG00000033498	0.813321	0.910462	0.949022	0.727817	1.13058	0.98092	0	0	0
ENSMUSG00000039989	3.3981	3.74359	3.24065	3.73392	4.1966	4.06412	16.2953	17.3397	22.5692
ENSMUSG00000048572	11.8989	12.3	11.8405	6.78989	7.3216	6.03493	1.39634	0.956594	1.41776
ENSMUSG00000006360	8.02233	5.17123	6.28472	3.70959	4.24478	3.4529	0.170795	0.0642426	0.0881923
ENSMUSG00000024365	3.23828	2.9122	3.74298	6.34606	7.06344	6.32232	0.165278	0.0795003	0.158688
ENSMUSG00000005320	6.82664	6.73047	6.52386	2.44237	3.34163	3.16355	0.161145	0.335482	0.239743
ENSMUSG00000015709	3.25682	4.3907	4.09346	3.21046	3.49568	4.44305	0.361008	0.412341	0.391371
ENSMUSG00000042808	73.2477	52.7691	19.1468	33.5162	32.0109	70.8605	0.300664	0.184764	0.377103
ENSMUSG00000037465	16.3703	17.9218	15.974	39.0784	42.0772	37.2299	86.005	85.7916	92.8751
ENSMUSG00000040703	6.5433	6.74831	6.79483	5.78977	7.09255	8.05543	26.6916	30.3652	36.9253
ENSMUSG00000026880	16.52	16.0388	16.5219	20.378	18.2845	20.5573	63.8643	62.8093	71.0439
ENSMUSG00000055567	1.28849	1.40329	1.36598	1.47347	1.74826	1.99706	0.0739635	0.111671	0.136628
ENSMUSG00000038119	2.62253	2.90178	2.83571	4.09062	4.61878	4.45327	12.1719	16.0304	15.7249
ENSMUSG00000019320	8.7119	8.48524	8.60141	8.06941	7.84492	8.07554	1.19348	1.06259	1.05288
ENSMUSG00000020057	17.8941	18.3833	16.5881	18.0146	15.4858	16.3661	3.12652	2.66371	2.34425
ENSMUSG00000005667	10.9095	9.63358	9.09342	23.1517	20.6961	20.3161	60.7632	56.3497	46.6478
ENSMUSG00000040435	14.7053	14.637	14.6074	24.3534	25.0397	25.8012	66.9422	60.2266	73.9643
ENSMUSG00000041642	0.533586	0.711196	0.607767	0.747871	0.722149	1.10776	3.81601	5.29173	6.6126
ENSMUSG00000036181	15.0606	11.1947	10.3602	21.919	22.5019	21.7721	95.3896	93.8206	63.2832
ENSMUSG00000029371	116.477	85.9889	86.6937	84.4646	62.2939	57.0338	12.1209	7.76848	7.30399
ENSMUSG00000026068	3.95132	3.75647	4.1709	4.08691	3.91667	4.05159	0.532228	0.616187	0.578098
ENSMUSG00000021367	18.7202	14.749	16.1501	22.8758	20.6352	19.6181	2.23435	1.48776	2.63837
ENSMUSG00000034918	2.76989	3.64179	3.22771	6.08027	7.43679	7.77262	0.632824	0.639319	0.520789
ENSMUSG00000067006	31.8502	28.4089	27.7295	33.1572	27.062	26.61	6.07238	4.59164	4.71341
ENSMUSG00000026405	1.38939	1.20196	1.13979	2.03323	1.67388	1.96783	0.0113896	0.0378225	0.0534726
ENSMUSG00000041762	5.43398	6.07878	6.05102	4.5609	4.39261	4.88879	0.618854	0.889799	0.824414
ENSMUSG00000030703	9.00263	9.00753	7.84246	12.797	11.8176	10.6749	1.35203	1.13751	1.03689
ENSMUSG00000028059	0.339352	0.629665	0.480625	0.539359	0.984438	1.17614	5.26456	6.0006	7.35297
ENSMUSG00000035852	2.65006	4.51305	4.51202	3.7992	5.5478	5.0449	0.072733	0.0297636	0
ENSMUSG00000026327	4.28263	2.97316	3.73568	16.2678	12.9065	12.4494	30.5962	26.6462	27.5831
ENSMUSG00000020159	29.302	26.6428	25.7849	37.6933	33.7763	34.9664	6.36119	5.67677	7.794
ENSMUSG00000025408	9.10416	8.37727	9.14282	24.3273	19.5309	22.9819	66.2194	52.6015	46.9983
ENSMUSG00000003541	134.975	122.477	122.535	146.54	140.514	144.365	33.5777	33.7099	25.8954
ENSMUSG00000035385	152.838	139.392	126.447	121.86	104.434	104.984	30.8874	25.5558	29.6402
ENSMUSG00000024164	128.004	156.662	152.269	81.593	93.6836	94.3418	15.8374	20.2209	23.6815
ENSMUSG00000033208	9.78651	8.38293	7.30907	9.44545	7.21113	7.59119	0.510129	0.227874	0.338837
ENSMUSG00000024665	32.4986	32.9827	33.165	12.3221	10.6386	12.61	7.40459	7.13051	8.17654
ENSMUSG00000035778	2.02221	1.84129	1.61272	1.39721	1.24344	1.59177	0	0	0.0285853
ENSMUSG00000025140	1.3939	1.15026	1.57036	2.2873	2.20885	2.12593	9.38186	7.56977	10.0526
ENSMUSG00000003617	7.37163	8.27682	7.68366	5.04815	5.37334	5.02968	1.51017	1.24001	1.4912
ENSMUSG00000020598	2.03436	1.85034	1.97482	2.39908	2.62617	2.43809	0.0322647	0.140694	0.0946387
ENSMUSG00000041237	2.83483	3.83798	2.84087	2.4682	2.38441	2.29094	0.0920425	0.0919125	0.0275654
ENSMUSG00000030170	1.89955	1.27031	2.17932	1.87871	1.73035	2.26785	0.0189108	0	0
ENSMUSG00000031700	1.89899	1.93885	1.92937	4.71652	4.96224	5.54117	11.0309	12.8285	9.61289
ENSMUSG00000015568	4.20738	4.37015	3.70464	3.97659	3.80189	4.10978	13.2644	13.2602	13.5353
ENSMUSG00000032193	12.3554	15.5032	15.3062	8.75978	10.2336	10.7484	2.29375	2.96292	2.87752
ENSMUSG00000079507	3.84432	3.7676	3.74071	5.00699	3.6833	3.83305	20.8422	19.4155	15.0173
ENSMUSG00000038418	8.82815	9.40323	9.17984	20.0831	21.4478	21.4043	2.91606	3.58433	4.48201
ENSMUSG00000023805	1.87173	2.29435	2.09296	2.39172	2.81436	2.43094	0.215341	0.308226	0.179885
ENSMUSG00000032359	34.4283	25.2442	30.0788	46.1926	40.3105	47.5255	9.58746	6.81631	6.45477
ENSMUSG00000039831	1.09049	1.18571	1.27134	1.12527	1.09147	1.27267	4.4114	4.9922	5.3821
ENSMUSG00000086290	4.53972	3.71108	4.62087	4.454	5.49072	6.48394	21.6196	20.5651	22.9774
ENSMUSG00000049422	2.42774	2.04352	1.76351	1.36692	1.01542	1.02779	14.0406	11.4088	10.4341
ENSMUSG00000024399	6.89871	5.9111	7.14218	3.85754	4.1968	5.04487	0.337442	0.222965	0.190552
ENSMUSG00000055116	1.78856	2.19494	2.45041	2.8153	2.55027	2.49664	8.41369	9.2168	10.9837
ENSMUSG00000031506	3.36103	4.9511	5.13181	2.63292	4.1023	4.04731	0.358969	0.221702	0.416291
ENSMUSG00000021048	34.177	39.1566	39.3042	25.5558	28.2726	29.7564	8.30823	9.65509	9.19342
ENSMUSG00000063410	8.54798	8.71199	7.87453	8.96811	10.0407	8.79951	25.8653	28.4306	32.8419
ENSMUSG00000028179	0.950706	0.473815	1.0503	1.03593	0.953939	0.932354	10.2703	9.35149	6.58484
ENSMUSG00000026628	12.9816	10.6556	11.8336	19.8248	22.1072	21.0434	67.2109	67.3882	44.1962
ENSMUSG00000096210	78.7906	66.8635	69.5813	112.639	99.6827	100.528	317.803	289.224	273.674
ENSMUSG00000025534	25.3937	22.1056	25.2426	28.1496	26.877	27.2989	7.25078	6.89978	5.86708
ENSMUSG00000036198	0.935489	0.569171	0.765184	1.46673	1.03139	1.60095	0	0	0
ENSMUSG00000029380	38.5717	36.3039	30.7793	35.8675	27.4783	30.6994	7.28559	5.79012	4.82086
ENSMUSG00000079536	17.0541	14.8825	13.5627	17.6703	16.1737	14.8979	0.673261	0.346503	0.976894
ENSMUSG00000007097	7.0426	7.40738	7.64465	10.7144	11.7055	11.1605	2.13162	2.63803	2.23643
ENSMUSG00000056749	3.20053	1.93469	3.48232	5.69884	5.51139	5.89384	21.7961	17.7289	21.031
ENSMUSG00000025608	18.913	22.1492	21.5873	24.3445	26.0964	26.0437	5.56561	6.12846	7.00731
ENSMUSG00000026380	7.67445	9.42675	10.1977	5.90068	7.40913	7.33193	1.50488	1.98458	1.62779
ENSMUSG00000031785	1.93785	1.80116	1.99796	2.68285	3.59447	3.52448	0.219033	0.128897	0.259444
ENSMUSG00000045667	0.363906	0.239065	0.467519	0.230452	0.137545	0.0840347	3.20471	3.41238	3.9306
ENSMUSG00000032549	0.0839466	0.120957	0.0959172	0.156327	0.12312	0.255702	1.87156	1.84336	2.0275
ENSMUSG00000021253	3.02981	4.19873	2.77923	2.11863	2.82748	2.47523	0.075858	0.012572	0.093273
ENSMUSG00000058952	27.5105	22.1143	22.942	10.1013	6.89299	7.36111	4.82501	4.36967	4.28088
ENSMUSG00000036390	11.4244	8.95402	11.4108	16.3931	19.3871	14.993	50.2804	61.8002	43.8816
ENSMUSG00000055415	0.720561	0.8247	0.85938	1.81969	2.25372	2.16021	0.0973901	0.0945987	0.189705
ENSMUSG00000059901	0.132198	0.268793	0.217055	0.346898	0.320407	0.168609	2.30542	3.3605	3.80044
ENSMUSG00000024691	39.8163	40.7091	39.6829	33.1334	33.633	36.7327	10.5732	11.369	11.9404
ENSMUSG00000025810	3.45718	4.97797	4.33174	2.60052	3.21712	3.14815	0.442366	0.694313	0.677246
ENSMUSG00000022325	42.7489	43.5427	44.4162	26.7177	26.3554	28.5602	11.4526	12.4867	11.773
ENSMUSG00000025544	9.2738	8.45646	8.76549	11.3295	9.71727	9.67113	36.9198	32.996	27.0977
ENSMUSG00000029446	3.04942	2.75832	2.2657	4.15741	4.92294	5.05199	18.2575	18.6687	10.9149
ENSMUSG00000014030	0.0762654	0.089901	0.140294	0.0761289	0.0959395	0.0810689	0.892716	1.09427	1.59116
ENSMUSG00000002985	30.4875	38.7152	36.9899	40.9147	37.7793	39.566	10.389	8.5555	10.198
ENSMUSG00000024810	11.6965	10.4048	10.0872	7.49902	7.93162	7.44927	2.10421	1.58699	1.917
ENSMUSG00000031551	2.06772	1.57224	2.04947	2.87833	2.01595	1.54477	0	0.0129594	0
ENSMUSG00000039114	14.1993	12.2385	12.1847	11.908	10.5157	6.07974	54.0399	46.9623	46.2085
ENSMUSG00000028645	27.5715	30.216	29.1901	25.9891	29.3866	29.4627	76.7905	85.2166	91.7248
ENSMUSG00000105971	6.52743	6.43405	6.61563	4.27372	3.59516	4.39	0.170533	0.07161	0.116604
ENSMUSG00000072623	1.38691	1.35015	1.29371	1.75929	2.11442	1.68989	6.09952	5.91651	6.21888
ENSMUSG00000072620	14.6588	12.37	12.8111	8.26489	7.92926	6.75585	1.83251	1.24968	1.00232
ENSMUSG00000049608	11.8369	10.7704	11.6142	9.7854	9.41786	8.33393	2.51049	2.61005	2.67786
ENSMUSG00000018916	37.0574	34.2652	27.1686	69.1191	64.8256	58.5708	8.55836	5.09963	10.5914
ENSMUSG00000074673	3.97942	3.16455	3.81865	2.95249	3.08332	2.47315	0.196262	0.0487343	0.184639
ENSMUSG00000023883	12.6054	10.0828	12.3307	14.4665	13.5359	13.366	38.4862	34.3263	36.5662
ENSMUSG00000027356	4.4172	4.60034	4.03582	5.68139	5.83492	6.42142	0.0952715	0	0.031472
ENSMUSG00000031886	8.17868	7.73536	8.77577	5.49498	5.21234	5.44042	0.809882	1.1495	1.30889
ENSMUSG00000045394	31.0821	25.8799	28.4089	47.8336	42.6787	43.349	11.6707	10.4012	8.42158
ENSMUSG00000033581	2.7339	3.26319	3.06742	1.85698	2.34969	2.74079	9.92632	8.86426	14.9338
ENSMUSG00000040829	3.38918	5.75361	5.8368	4.69218	5.34634	5.06509	0.685934	0.346132	0.505984
ENSMUSG00000000489	13.6688	13.8094	14.2874	24.0919	27.5632	25.985	6.47068	7.6346	6.63157
ENSMUSG00000034450	1.43316	1.69708	1.46978	7.44194	7.41419	6.44515	0.685423	0.926659	0.980464
ENSMUSG00000001249	2.24754	2.01977	2.21343	2.83645	3.38907	3.02908	0.0759275	0.187225	0.0438085
ENSMUSG00000031387	32.1906	31.5916	28.2057	28.3196	30.2719	27.3432	9.21059	6.87975	6.73319
ENSMUSG00000038894	5.47332	6.5559	6.64827	4.3022	5.75141	5.62294	15.7647	20.3371	23.2899
ENSMUSG00000026519	4.08927	4.99437	4.41112	8.12655	10.1855	9.39084	17.1398	19.4951	21.4529
ENSMUSG00000022136	7.4839	7.8799	7.37062	9.41637	8.74069	9.24274	23.7995	27.085	21.4827
ENSMUSG00000063354	47.4568	53.7845	51.1168	46.4164	47.0088	50.8136	15.4412	15.4294	16.932
ENSMUSG00000082437	6.06221	6.14181	6.2875	4.34155	5.98239	3.08689	0	0	0
ENSMUSG00000079330	0.80191	1.28124	1.33304	1.20556	1.43894	1.22914	0.0229865	0.00769686	0.0463208
ENSMUSG00000031490	37.4425	36.2275	33.9168	45.5494	40.0918	42.7938	104.031	101.574	108.271
ENSMUSG00000073678	8.26796	8.49634	9.22376	7.94324	9.41077	9.29089	2.40879	3.03858	2.53325
ENSMUSG00000038742	0.243582	0.066909	0.30103	0.292788	0.294947	0.144473	6.6446	6.21067	3.68978
ENSMUSG00000086841	87.3163	59.9851	62.8368	112.657	94.0341	92.0062	377.244	308.395	239.274
ENSMUSG00000020151	1.76925	1.66491	1.69904	2.92791	3.69974	2.19189	0.19524	0.192435	0.0722272
ENSMUSG00000024598	2.50348	3.17153	3.65531	1.94636	2.57461	2.57779	0.547383	0.645004	0.589645
ENSMUSG00000024924	2.96372	3.27701	3.19271	4.55499	4.50169	4.99085	10.4524	10.6185	10.4571
ENSMUSG00000002565	0.408297	0.22206	0.608762	1.51719	1.67433	1.10427	0	0	0
ENSMUSG00000056313	7.13091	7.4263	7.63082	21.7272	19.3574	18.9793	31.8131	28.4624	30.0579
ENSMUSG00000038725	0.073964	0.072077	0.0672229	0.0581379	0.0566223	0.0772875	0.388213	0.797544	0.76751
ENSMUSG00000030854	0.148261	0.127488	0.146183	0.153129	0.109675	0.162906	1.13724	1.56407	1.63249
ENSMUSG00000026142	9.78708	9.63834	9.56885	11.3746	11.1704	11.0773	25.9336	26.5745	28.1196
ENSMUSG00000025383	7.01771	6.01048	6.70144	11.4839	10.088	10.7951	1.8476	1.61607	1.93701
ENSMUSG00000047822	1.44841	1.81133	1.90158	2.21237	1.91109	1.25224	15.8746	13.5544	12.8171
ENSMUSG00000053007	0.237351	0.295752	0.290576	0.431094	0.534614	0.541991	1.13933	1.39494	1.55937
ENSMUSG00000008999	2.50765	3.86394	3.43078	3.8574	4.37522	5.55458	13.1802	14.6903	19.9169
ENSMUSG00000046805	4.64472	5.26726	4.734	1.68282	1.20057	1.06199	0.593837	0.548188	0.773509
ENSMUSG00000016283	6.96957	7.59642	5.68723	2.71764	2.93701	3.08976	0.286878	0.1008	0.04339
ENSMUSG00000002204	0.196893	0.143984	0.072506	0.376757	0.244136	0.173223	3.014	3.03154	2.8988
ENSMUSG00000051379	9.00346	8.21639	8.93367	5.95564	5.75296	5.16554	1.48038	2.19926	1.39771
ENSMUSG00000049313	2.52803	3.65964	3.97412	2.6717	3.86216	3.48961	0.323112	0.580081	0.608587
ENSMUSG00000038295	16.809	18.1552	17.9793	24.2112	27.8285	26.5459	6.5054	6.8741	8.2271
ENSMUSG00000026308	0.356202	0.64738	0.522095	1.42617	1.86691	1.74352	4.94885	6.72381	4.35715
ENSMUSG00000040848	23.5685	24.1801	25.8393	34.9255	37.4479	37.7169	77.9923	90.488	75.3677
ENSMUSG00000026663	7.32713	7.97485	7.54522	8.98367	9.23378	9.14903	19.0696	22.55	25.0515
ENSMUSG00000011382	0.125906	0.125112	0.158543	0.124411	0.105664	0.177184	0.986642	1.48095	1.27743
ENSMUSG00000017002	47.344	35.1709	39.7561	34.4851	32.4799	28.3995	8.61582	7.43072	4.63195
ENSMUSG00000002257	1.72543	2.12104	1.69773	1.96154	3.11332	1.9759	0.0677561	0	0.015789
ENSMUSG00000079531	0.317314	0.291797	0.493031	0.197491	0.143971	0.250043	2.33664	3.17316	3.29648
ENSMUSG00000032470	6.31586	7.61376	6.25735	9.03282	9.51175	10.1156	20.6482	22.2593	30.5069
ENSMUSG00000085139	0.250322	0.200891	0.36028	0.612438	0.680672	0.721406	0	0	0
ENSMUSG00000039236	4.71665	4.5968	4.87632	5.31957	5.10482	4.49084	16.6436	15.4387	19.5938
ENSMUSG00000101904	0.876086	0.91024	1.22226	1.19148	1.24445	1.73066	0	0	0
ENSMUSG00000037440	23.0679	19.8844	21.6663	15.1943	11.828	13.311	5.61204	4.29349	3.77784
ENSMUSG00000024378	13.687	13.1812	14.6353	7.79701	8.56073	8.67119	3.24032	4.09055	2.92261
ENSMUSG00000039607	1.05099	1.32391	1.25414	1.30562	1.39052	1.54195	0.134906	0.23662	0.193717
ENSMUSG00000112907	30.5639	25.3662	29.5505	26.3504	22.6093	23.6636	7.95461	7.359	5.02816
ENSMUSG00000042659	7.41074	6.56883	6.69903	10.8422	10.3069	10.3284	23.8057	22.1089	21.2099
ENSMUSG00000025555	2.5944	3.55733	2.77139	3.93258	4.99282	5.19579	9.98693	13.4045	13.9221
ENSMUSG00000028194	23.9371	27.0847	25.9086	18.4624	19.4948	20.5065	5.61526	6.12165	8.40336
ENSMUSG00000061414	1.0372	1.35379	1.22463	1.30259	1.70241	1.84445	0.185729	0.107248	0.188446
ENSMUSG00000026675	6.93852	6.94721	7.50931	3.71154	3.76553	3.99954	1.60793	1.8151	1.86126
ENSMUSG00000059743	21.613	13.1354	15.2342	11.2525	9.39039	9.70153	3.76031	2.34404	2.73938
ENSMUSG00000022797	65.3243	68.0263	71.9574	64.1171	75.0654	75.3704	18.5713	20.6851	12.0922
ENSMUSG00000026249	1.91537	1.67554	1.99553	1.85784	1.68734	1.70739	0.342793	0.273554	0.19451
ENSMUSG00000054580	0.206107	0.325637	0.484655	0.318107	0.302876	0.373233	0.00400381	0.0042289	0
ENSMUSG00000055407	0.73944	0.854114	0.828951	0.916981	1.00054	1.06632	0.0975937	0.0645855	0.110822
ENSMUSG00000025780	1.51464	1.63806	1.69773	1.83907	1.91152	2.07164	4.60418	6.61246	6.01749
ENSMUSG00000035861	0.293057	0.376693	0.359202	1.26392	1.35982	1.03898	0.024766	0.020394	0
ENSMUSG00000001768	7.59647	7.18061	7.52056	8.84381	8.88295	9.42336	2.89769	3.05885	2.45721
ENSMUSG00000051498	1.48634	1.56601	1.6736	1.19615	1.20208	1.14983	0.121638	0.079643	0.0695453
ENSMUSG00000062007	3.26467	3.16916	3.33738	3.32338	3.50157	3.38014	0.142082	0.244844	0.049427
ENSMUSG00000047281	23.5418	26.9998	21.7223	30.9498	34.6966	36.5477	6.98589	8.50494	9.68732
ENSMUSG00000113346	49.6062	38.568	41.3091	33.2671	27.8909	29.1121	11.9956	9.04727	10.7568
ENSMUSG00000032281	4.50924	4.12579	4.85307	13.1251	14.3138	15.9882	5.41049	5.43462	4.55927
ENSMUSG00000026414	3.47715	2.96635	3.32491	7.3937	6.3828	6.86438	1.43258	1.76944	1.99137
ENSMUSG00000047963	7.85487	5.887	6.23952	9.21636	7.39363	7.96662	31.1051	27.1853	19.5646
ENSMUSG00000024032	24.2006	22.7528	24.7201	27.2427	22.5648	21.5866	4.64285	4.30863	2.63078
ENSMUSG00000005686	1.50409	1.80646	2.09056	1.394	1.54527	2.08763	5.9582	6.06064	7.487
ENSMUSG00000032252	2.61085	2.90028	2.31293	2.6873	2.26945	2.31465	6.99726	8.28365	7.3266
ENSMUSG00000008855	0.780712	1.19482	1.07693	1.53961	2.14752	1.91391	4.40284	4.4674	4.87556
ENSMUSG00000027375	38.489	33.7183	31.9877	46.0716	42.9981	39.5792	14.4265	12.9068	10.7179
ENSMUSG00000001120	0.784518	0.793563	0.836354	0.588428	0.683831	0.383729	0	0	0
ENSMUSG00000022146	0.530662	0.854096	0.492475	0.91823	0.793422	0.875014	2.60318	2.7101	3.18827
ENSMUSG00000066441	13.3456	12.0341	12.8859	9.2001	8.93105	9.81695	3.78745	3.54426	3.20524
ENSMUSG00000082361	0.775879	0.667196	0.846317	2.07339	2.00164	2.00879	0.192359	0.167569	0.109058
ENSMUSG00000005089	1.12545	1.75382	1.50039	0.45698	0.552881	0.352351	0.232784	0.197096	0.210704
ENSMUSG00000005413	41.839	38.5644	38.8211	17.7416	19.1229	15.6714	53.8048	54.4383	68.1561
ENSMUSG00000073125	0.521672	0.354615	0.193031	0.51928	0.377086	0.395131	3.53353	3.01317	3.11849
ENSMUSG00000031790	2.04515	2.6144	2.28104	2.5851	3.62067	3.61477	0.488977	0.569904	0.499167
ENSMUSG00000035095	0.376979	0.56273	0.613393	1.23346	0.997735	1.49723	0.048509	0.0248792	0.0314919
ENSMUSG00000031750	39.7639	34.7757	40.7169	41.4962	42.0629	46.3761	13.1334	13.9144	14.9712
ENSMUSG00000056413	1.29437	1.64346	1.14687	1.00054	0.792685	1.11339	5.09904	7.20765	4.78856
ENSMUSG00000049593	5.58682	6.67234	4.82801	6.35717	6.81905	8.34244	0.293663	0.179886	0.471673
ENSMUSG00000095569	2.37013	2.0265	1.46445	1.73652	1.46428	1.54929	0	0	0
ENSMUSG00000019102	7.63966	8.50678	7.14419	6.78656	5.96107	6.2453	1.47644	1.13377	1.2997
ENSMUSG00000081683	1.77144	2.41848	2.5058	3.96241	4.69064	6.01687	0.482263	0.285057	0.620436
ENSMUSG00000026971	1.01135	0.949154	0.950084	1.80516	2.14241	1.95973	0.210731	0.323376	0.272275
ENSMUSG00000073257	3.68148	2.43261	3.15405	0.166667	0.343077	0.313415	0	0	0
ENSMUSG00000001467	22.1795	22.248	22.5746	16.3009	15.5869	15.8322	7.76875	7.48609	7.21892
ENSMUSG00000039126	0.424315	0.925542	0.814374	1.00244	1.64033	1.36393	3.02599	5.8944	6.0997
ENSMUSG00000044788	6.27737	6.98442	6.50104	6.56351	7.11492	7.22104	15.3975	19.9439	16.7048
ENSMUSG00000026175	63.7686	71.7573	71.8872	70.6292	74.0042	78.3369	25.7175	28.3106	25.0262
ENSMUSG00000047153	2.61795	3.30374	3.63776	4.40021	4.85147	4.7491	10.9579	12.2882	9.34766
ENSMUSG00000022197	0.513312	0.847519	0.678592	0.710865	1.0067	1.014	0.0868679	0.121203	0.142056
ENSMUSG00000041220	12.4402	13.3102	13.9848	6.88919	8.18078	8.2811	4.23232	4.22594	3.79564
ENSMUSG00000041734	7.0402	7.82645	8.06455	6.36164	7.74526	7.28328	1.69449	2.40979	2.427
ENSMUSG00000022505	6.57563	5.4243	6.29919	9.311	8.30091	8.61547	17.9838	16.9556	16.7643
ENSMUSG00000019838	5.92019	5.4786	5.43462	7.68662	7.96122	7.9606	15.5935	16.4828	14.7206
ENSMUSG00000030662	21.2481	21.1929	21.6332	19.182	19.8644	20.3462	45.8355	50.8886	47.248
ENSMUSG00000026822	9.63059	9.06661	8.60873	3.32038	2.28393	1.8702	2.01964	1.37479	1.82098
ENSMUSG00000024827	0.840422	0.892446	0.860488	0.844103	0.633769	0.768072	0.0255285	0.0346192	0
ENSMUSG00000058454	1.65057	1.84936	2.12302	0.691702	0.587643	0.634452	0.123898	0.253555	0.143961
ENSMUSG00000026580	2.22463	3.55112	3.24051	1.52078	1.32057	1.42055	0.30844	0.425901	0.375861
ENSMUSG00000025545	0.98579	1.15947	0.688824	1.20983	0.786006	1.39797	7.66371	6.94336	6.76332
ENSMUSG00000001622	9.4813	8.81143	6.98218	10.6997	7.59098	8.07243	31.3007	20.2056	34.7402
ENSMUSG00000037940	0.423251	0.686791	0.51704	0.877304	0.815206	0.778776	0.025743	0.00488305	0.0469511
ENSMUSG00000073557	6.7375	8.73888	9.17953	8.05915	9.67256	9.35021	2.48937	3.30529	2.85181
ENSMUSG00000023952	4.48205	4.42944	4.52893	6.99508	7.43854	7.69417	17.8894	20.0277	11.7317
ENSMUSG00000040093	0.196925	0.319634	0.142713	0.395401	0.188135	0.187355	2.24082	2.1805	1.89221
ENSMUSG00000025135	12.5016	8.69513	10.3726	9.91352	10.0631	10.7231	3.33559	3.29898	3.25663
ENSMUSG00000066643	4.4321	4.64472	4.2932	3.78806	4.0498	3.74132	1.32403	1.38443	1.22332
ENSMUSG00000024485	0.880314	0.950798	0.848443	0.375863	0.644146	0.524202	0.052132	0.0626684	0.0464046
ENSMUSG00000025791	17.2109	17.4063	16.8647	13.337	12.9326	13.8707	35.9963	35.7129	34.5648
ENSMUSG00000028811	8.65046	7.65218	8.67497	11.0027	11.242	10.9953	24.4138	25.3988	19.9212
ENSMUSG00000042306	4.01279	2.73434	3.28779	10.016	10.9481	8.36353	1.77096	1.01352	1.01887
ENSMUSG00000037405	36.2319	35.1266	33.8061	28.64	27.6846	30.1524	12.7237	12.7097	13.5807
ENSMUSG00000028150	1.71217	1.68058	1.68827	1.01218	0.790721	0.980997	4.37539	4.90631	4.78501
ENSMUSG00000037712	6.91411	5.49299	6.24168	4.1912	4.33375	3.77708	12.9111	12.3977	12.9176
ENSMUSG00000020653	1.24577	1.09781	1.14923	3.12173	3.18346	3.68484	5.06448	4.96756	5.36678
ENSMUSG00000025854	16.6898	17.0779	16.6589	14.0763	14.6927	15.7784	5.86834	5.89739	6.63451
ENSMUSG00000035356	10.159	9.2643	9.59379	10.6668	11.1204	12.5839	3.63123	3.50304	3.95247
ENSMUSG00000067001	65.9492	54.0197	58.2982	49.769	42.8059	42.6844	20.7139	18.0602	13.7962
ENSMUSG00000032315	2.54935	2.83363	2.75012	5.96582	5.1926	4.71327	11.5625	11.488	9.196
ENSMUSG00000024038	7.38213	7.96686	6.78152	6.79442	6.08861	6.94946	20.2495	16.034	20.331
ENSMUSG00000004558	4.75013	4.36037	4.22604	4.75379	4.76598	4.46333	12.6417	12.9921	11.4849
ENSMUSG00000006538	8.32131	7.74936	9.3561	3.46599	4.51502	4.73574	1.5601	1.94683	1.92285
ENSMUSG00000032440	37.2647	39.3042	38.9459	37.193	38.9188	36.2655	12.3028	13.6051	15.7406
ENSMUSG00000032515	3.43914	3.26155	3.57496	6.72382	7.73308	6.90179	11.0518	11.1645	14.3693
ENSMUSG00000045625	1.86222	2.06518	1.91744	2.08682	0.890747	1.71552	0.10199	0.0667775	0.103884
ENSMUSG00000041608	0.903898	0.728064	0.849692	1.69454	1.56578	1.77352	0.0961857	0.033981	0.0120041
ENSMUSG00000055301	5.01789	5.66877	5.48786	5.51076	5.30496	5.37512	14.103	15.3888	13.1291
ENSMUSG00000050092	3.73717	2.78444	2.22068	1.57451	1.04873	1.93747	0	0	0
ENSMUSG00000054932	106.546	87.1444	89.0465	49.2382	40.0533	38.8353	36.792	29.3998	26.9522
ENSMUSG00000025228	35.8348	38.9874	39.2516	33.1002	33.176	34.2667	14.8301	12.36	15.501
ENSMUSG00000038963	1.75347	2.43256	1.6195	1.25551	1.4903	1.3178	0.157781	0.232603	0.247858
ENSMUSG00000020263	4.83827	4.16745	5.29669	6.15312	6.3154	5.26301	14.9365	14.6154	12.1701
ENSMUSG00000058354	3.22263	3.30759	3.77499	4.47032	4.35921	3.34492	0.504821	0.693761	0.422299
ENSMUSG00000018920	80.65	83.7482	81.67	84.2192	86.8416	91.3523	31.4012	30.7128	36.8566
ENSMUSG00000044468	5.07914	5.352	5.84939	7.02785	7.32787	7.70604	2.36171	2.33574	2.09407
ENSMUSG00000060224	2.22151	2.65432	1.80235	3.04722	3.14895	3.51852	7.74559	7.2064	8.08515
ENSMUSG00000006519	2.78558	1.29018	1.1837	1.93373	1.63357	1.51716	0	0	0
ENSMUSG00000031431	6.55806	6.36629	6.5936	13.3762	13.888	13.0397	16.8028	21.1661	19.1559
ENSMUSG00000029368	57.6141	42.5297	46.1147	42.7941	27.9554	29.3334	120.596	95.5274	117.131
ENSMUSG00000020473	8.17767	10.1544	9.11982	5.15709	5.72843	5.47784	1.77549	2.11524	2.85053
ENSMUSG00000056501	23.0417	25.9058	26.0408	21.9047	27.5029	25.5201	52.613	66.8718	76.0878
ENSMUSG00000069998	0.636903	1.40528	1.30619	1.1659	1.40431	1.40688	0.0292669	0.071964	0.0127267
ENSMUSG00000068323	1.10067	1.43403	0.965172	1.26987	1.22563	1.36162	0.0534879	0.150175	0.124265
ENSMUSG00000074652	0.00919858	0.0065634	0.0027805	0.023304	0	0.0416462	0.527797	0.804604	0.641603
ENSMUSG00000025025	3.10447	3.22186	2.65146	4.9164	5.16232	5.0488	8.97607	8.69786	9.45346
ENSMUSG00000042286	1.133	1.73179	1.73984	1.41783	2.02735	2.12433	0.257528	0.336598	0.385027
ENSMUSG00000026656	1.0505	0.924476	1.07013	0.493238	0.559878	0.419193	0	0	0.0311416
ENSMUSG00000028256	5.65971	6.11862	6.42608	6.34184	6.00285	6.47817	2.02964	2.61214	2.05853
ENSMUSG00000056671	17.8119	14.6211	14.1805	13.1023	12.6469	9.40002	44.747	34.8991	36.5207
ENSMUSG00000019737	2.07362	2.11192	1.70283	1.29793	0.998122	1.47871	0.176047	0.141704	0.170555
ENSMUSG00000026576	78.0281	67.6746	69.8077	63.491	58.0493	55.9382	27.7287	26.7129	25.5086
ENSMUSG00000028780	29.2314	31.7073	32.2383	42.2981	45.0353	46.5953	17.1479	15.4303	16.0334
ENSMUSG00000024754	5.42326	7.55693	6.40869	4.66689	5.99614	5.96991	1.53536	2.15359	1.85351
ENSMUSG00000020889	4.1995	4.99073	3.97585	8.01585	9.04686	8.8505	13.0054	15.3616	21.0668
ENSMUSG00000025017	19.5802	21.9712	21.2852	18.8662	19.7134	19.4927	6.65683	7.25804	9.07401
ENSMUSG00000027880	1.69639	1.62606	2.10618	3.00043	2.03842	2.39558	0.0933844	0.0844414	0.189677
ENSMUSG00000022425	17.2617	15.3914	16.2196	30.1938	26.3037	27.9723	46.0098	43.0018	43.2142
ENSMUSG00000030513	28.9987	39.396	36.8601	32.9048	40.6519	41.5508	10.6129	13.7971	14.1304
ENSMUSG00000019850	4.02338	4.08365	9.04133	17.3574	17.5273	17.3281	3.95093	4.43351	3.05555
ENSMUSG00000035246	4.52188	5.16319	4.97609	4.95842	5.5623	5.58336	1.12128	1.25497	1.88788
ENSMUSG00000074272	24.1151	24.5803	22.3055	23.5921	21.7007	25.1402	7.4114	7.94117	10.8142
ENSMUSG00000024409	22.6102	22.5251	16.1111	15.9623	17.6862	15.0358	2.62154	2.75828	4.83249
ENSMUSG00000027612	30.4266	35.1332	32.026	38.3928	39.8487	41.4244	14.2025	16.0863	15.9124
ENSMUSG00000047821	11.5874	15.3246	11.2874	28.271	29.1119	26.9272	10.8337	10.9772	10.4339
ENSMUSG00000038550	0.0944025	0.246835	0.150483	0.741945	0.970017	0.579342	2.92458	1.93334	4.21647
ENSMUSG00000041323	1.18167	1.12185	0.925163	0.471397	0.344345	0.251054	0.0307863	0	0.0171207
ENSMUSG00000017607	40.1045	57.8412	49.5143	48.0942	59.7106	60.8391	10.5839	15.6354	19.169
ENSMUSG00000028517	7.27739	7.13951	6.33402	6.61458	7.62674	7.08646	1.54901	2.3819	1.98308
ENSMUSG00000027774	29.1684	28.79	29.0139	23.949	24.4677	22.69	11.3572	11.1719	11.6857
ENSMUSG00000042268	4.72037	4.70803	4.97704	6.86708	6.64532	7.51675	1.44606	1.16622	2.25082
ENSMUSG00000033788	0.0293334	0.0182998	0.0259867	0.086213	0.0815339	0.117228	0.51609	0.492117	0.461532
ENSMUSG00000021846	0.843096	0.756355	0.789277	1.06688	1.18654	0.924843	2.4386	2.84536	3.33955
ENSMUSG00000040010	36.3001	39.0036	39.2712	41.1985	43.1377	43.1306	82.6725	94.5177	91.478
ENSMUSG00000027620	33.2604	28.5405	29.7876	38.4353	37.5062	36.7279	94.3675	86.7117	70.4763
ENSMUSG00000029657	55.7287	49.957	50.7756	39.2732	39.5698	38.8435	19.802	19.6413	16.4631
ENSMUSG00000107768	2.70461	3.05622	3.42898	8.1333	10.1428	9.78238	2.78642	2.85668	2.83143
ENSMUSG00000068742	1.1466	1.12692	0.981288	1.21796	1.6445	1.60994	3.55123	4.43347	3.95387
ENSMUSG00000026012	0.72645	0.890386	0.702098	0.760022	0.701885	1.10087	0.0422728	0	0.00736334
ENSMUSG00000022371	8.63866	10.9568	11.463	10.3874	11.9647	11.8214	21.6676	30.1957	27.0755
ENSMUSG00000093930	20.3675	19.9179	19.8266	12.624	12.4598	11.4892	7.33652	7.29478	5.0372
ENSMUSG00000048078	0.108046	0.137701	0.154205	0.234309	0.508353	0.41349	0.646343	1.17278	1.3847
ENSMUSG00000047907	0.742698	1.25479	1.16088	2.13663	1.78159	1.98803	4.89176	3.5248	4.58437
ENSMUSG00000026235	0.307158	0.405455	0.328701	0.400121	0.40734	0.541851	0.0127354	0	0.0167903
ENSMUSG00000020122	13.1099	15.4797	15.544	14.5101	16.4777	16.6484	4.92027	6.01228	6.86894
ENSMUSG00000085412	2.28958	2.61875	1.05591	2.07793	1.01901	1.24062	0	0	0
ENSMUSG00000021062	0.360449	0.441351	0.344915	0.644729	0.84805	0.614613	0.0222689	0	0
ENSMUSG00000018906	10.3498	8.98001	9.35628	11.0086	11.7827	12.8087	24.4044	24.3183	21.6899
ENSMUSG00000027962	11.3185	10.0541	9.11479	9.53265	8.48948	8.04228	4.07407	3.30963	2.79818
ENSMUSG00000057337	0.359162	0.622044	0.497291	0.428163	0.559136	0.626182	0.0239328	0	0.00693813
ENSMUSG00000001729	88.0005	88.8303	88.6783	80.535	84.186	86.7067	34.2202	35.2336	36.099
ENSMUSG00000010095	53.3618	51.7937	50.3795	64.1296	63.6969	60.5236	123.451	124.1	136.76
ENSMUSG00000021037	53.9813	44.3751	43.0913	38.7957	37.2551	36.4554	18.666	16.2527	12.0618
ENSMUSG00000034926	61.2829	75.0655	68.4665	70.3819	86.364	91.6888	23.0709	29.6397	30.8044
ENSMUSG00000032827	0.581587	0.478937	0.645788	0.649012	0.568756	0.534418	0.111775	0.054916	0.0511698
ENSMUSG00000034160	19.3129	23.1075	23.6589	23.155	25.821	26.7342	49.2641	60.7895	57.4168
ENSMUSG00000019194	5.55262	5.19176	4.22076	6.59562	6.93096	6.38611	1.35902	0.654641	1.03263
ENSMUSG00000045414	2.05834	1.57188	1.67491	1.44564	1.66834	1.11213	5.40267	5.71258	5.07508
ENSMUSG00000043388	6.3287	6.7346	7.18576	5.27661	6.63586	7.35388	1.76786	1.99602	1.71812
ENSMUSG00000027765	3.27216	3.00315	2.72327	2.67123	3.65513	2.75016	0.665458	0.728679	0.605968
ENSMUSG00000066682	14.0333	11.9648	10.4577	15.4675	12.3086	15.6445	3.98264	3.44457	4.69926
ENSMUSG00000026456	15.9942	12.0058	11.5623	17.7717	12.5487	13.6939	35.4221	40.255	31.4212
ENSMUSG00000079014	0.876299	0.774126	0.35187	0.757484	1.08787	0.57255	0	0	0
ENSMUSG00000042129	2.11805	2.53419	2.15032	4.82154	4.68599	4.69897	6.22026	6.84371	6.3359
ENSMUSG00000045312	0.831498	0.96692	1.07314	0.413292	0.372263	0.398325	0.113571	0.0907303	0.0370828
ENSMUSG00000028161	5.97079	6.67534	6.09214	8.72413	9.53776	9.92438	14.4451	16.1668	16.2173
ENSMUSG00000026365	1.55889	1.31822	1.74521	1.07488	1.08042	1.05994	3.27249	3.52404	3.4653
ENSMUSG00000028737	1.73399	2.06681	2.45258	1.29943	1.32225	2.1126	0.212457	0.343808	0.275478
ENSMUSG00000041351	7.94567	9.27197	7.89365	6.70894	6.88128	6.3789	2.38991	2.95015	3.1254
ENSMUSG00000024610	19.7368	24.1408	16.4976	27.6259	22.008	23.172	7.57638	6.43084	7.82017
ENSMUSG00000030137	1.09855	1.16845	1.2028	1.53132	1.7227	1.49074	4.51481	5.39777	6.68019
ENSMUSG00000032198	0.769119	1.19768	1.25373	1.09678	1.31102	1.19105	2.80268	4.08681	4.16576
ENSMUSG00000109602	4.12565	2.94081	3.14321	2.99624	2.4674	1.44833	0	0	0
ENSMUSG00000037254	13.4615	13.478	13.3566	5.04999	4.26136	3.76753	10.3538	9.25276	10.9624
ENSMUSG00000040152	147.833	181.096	184.571	131.429	160.11	164.413	39.2158	52.3802	54.5244
ENSMUSG00000060962	35.8167	36.1478	33.8252	21.9263	20.2173	20.4692	57.3821	48.0361	56.7113
ENSMUSG00000110290	26.68	23.0516	19.5506	28.0396	22.8166	23.1528	9.33756	9.18198	8.15156
ENSMUSG00000040613	3.54612	3.01115	3.25787	6.47759	5.43534	4.90208	13.3397	9.62131	11.5118
ENSMUSG00000089728	45.0232	42.9741	51.1708	56.7712	51.0917	54.1971	15.9026	20.1521	12.5783
ENSMUSG00000020108	44.858	43.305	45.7091	91.1772	87.9852	91.5137	118.461	121.65	97.5579
ENSMUSG00000020142	19.0802	18.9414	18.6231	31.0376	30.4505	30.8381	42.3271	47.945	47.2344
ENSMUSG00000024085	18.5866	20.7191	21.07	21.6556	22.9986	23.6535	9.12274	9.71607	9.8184
ENSMUSG00000020715	8.99114	12.0704	10.4494	16.0349	18.1317	18.0566	24.7634	31.3959	32.0921
ENSMUSG00000021198	0.314146	0.41037	0.373317	0.433055	0.656836	0.644188	0.0699107	0.03053	0.0654586
ENSMUSG00000017390	0.481105	0.591427	0.458331	0.458865	0.148479	0.537956	3.42593	3.04204	3.06591
ENSMUSG00000038298	0.591566	0.765936	0.529134	1.04944	0.794624	0.643742	0.0270086	0	0
ENSMUSG00000103448	0.517014	1.70298	1.21526	0.603516	0.544135	0.860475	0	0	0.011727
ENSMUSG00000085761	6.48995	3.99246	2.81967	5.73553	5.97436	3.28915	0.164544	0	0
ENSMUSG00000038521	200.133	175.315	177.635	208.057	186.683	182.137	74.4152	70.8259	62.6782
ENSMUSG00000030826	2.15973	2.17074	1.43653	2.18574	1.92467	2.19608	0.142635	0.181636	0.0231167
ENSMUSG00000024222	5.26783	5.6964	5.88577	4.95622	4.93578	5.1253	11.1022	12.178	10.9645
ENSMUSG00000035311	9.90012	11.7929	11.1682	9.56846	10.9624	8.16197	3.12127	3.08493	4.34452
ENSMUSG00000010751	32.6786	31.4392	18.9913	32.2398	34.3385	31.8907	11.0136	9.47373	10.9201
ENSMUSG00000030187	3.32403	2.1125	2.74637	4.41234	4.20664	3.40894	15.9267	11.0692	9.26714
ENSMUSG00000025348	2.1476	2.12729	3.10555	2.77484	3.79898	4.10991	7.23861	9.09433	7.72813
ENSMUSG00000003031	7.15857	5.77629	6.3703	9.38921	8.5371	10.2034	19.4073	16.9094	16.5702
ENSMUSG00000039234	4.61412	5.17015	6.11168	5.15543	5.67896	5.84106	11.6823	12.8945	14.474
ENSMUSG00000003779	40.9207	38.2269	39.6027	34.8549	30.4042	33.417	15.1551	17.424	16.568
ENSMUSG00000020034	3.86033	2.39946	2.39823	5.79146	4.15653	4.50768	13.2961	10.3326	9.78758
ENSMUSG00000021175	11.1467	10.1689	9.22491	10.5593	10.0884	8.93571	3.63428	3.65229	3.76664
ENSMUSG00000064225	0.412684	0.402318	0.586108	0.382917	0.299821	0.40862	1.43989	2.10714	1.53918
ENSMUSG00000073598	13.6375	10.2236	11.0529	12.0519	10.4029	12.3518	4.11779	4.06314	2.68386
ENSMUSG00000015143	55.0074	67.0098	65.1792	64.2835	69.6091	75.2639	24.4701	26.959	28.1474
ENSMUSG00000049128	1.32695	1.81091	1.81134	0.669545	0.848513	0.382147	0.053935	0.022129	0.046907
ENSMUSG00000026398	2.67524	2.56328	2.2701	1.46761	1.07434	1.59629	0.443054	0.427167	0.585589
ENSMUSG00000021025	52.159	48.8129	55.3256	73.4853	74.4985	79.6461	30.4983	29.2702	31.0377
ENSMUSG00000019189	19.1335	18.9833	18.827	19.4316	19.549	19.8449	9.26267	8.92289	7.99269
ENSMUSG00000005373	0.714218	1.42474	0.813829	0.425624	0.596149	0.737946	0.028078	0.0795304	0.0569775
ENSMUSG00000022119	4.39688	5.36977	4.49629	3.27445	4.12427	4.5404	9.23846	10.7033	12.2805
ENSMUSG00000003032	38.5035	43.1661	43.8041	59.9704	63.2833	62.9393	96.9687	100.712	112.314
ENSMUSG00000054662	1.49192	1.60937	2.14248	2.7257	2.15407	2.13296	0.33301	0.208018	0.439276
ENSMUSG00000005142	6.73945	7.49954	7.61613	6.14282	7.57794	7.06506	2.60287	2.60671	3.08713
ENSMUSG00000079164	0.366859	0.463744	0.349805	0.138803	0.204168	0.198018	1.31547	1.5469	1.34302
ENSMUSG00000026110	0.403547	0.402133	0.464455	0.239027	0.239348	0.187788	0.0401519	0.0492973	0.0414395
ENSMUSG00000024201	2.58002	3.93754	3.41975	2.97069	2.71124	2.88176	6.81462	9.58142	8.99633
ENSMUSG00000027122	7.59459	7.12951	6.81213	9.62728	9.141	9.11103	18.76	18.2684	15.3831
ENSMUSG00000024042	8.53944	9.93283	10.3487	13.092	15.3567	15.738	21.7808	25.5948	29.8896
ENSMUSG00000037466	6.50205	6.80895	6.16953	7.45862	7.78773	7.65077	2.18903	2.94009	2.56086
ENSMUSG00000021281	6.20215	15.9509	13.591	10.0992	10.0302	6.12278	1.61466	2.21615	2.41958
ENSMUSG00000036944	7.24866	5.9729	5.33986	9.25948	7.9543	7.69996	21.3109	17.5145	15.3777
ENSMUSG00000022893	11.4034	11.8221	12.2577	9.83325	9.65063	10.0952	22.7865	23.5984	20.886
ENSMUSG00000029408	4.05142	3.05873	2.72392	2.50844	2.69156	2.57729	0.920772	0.699768	0.795008
ENSMUSG00000006369	2.5335	2.7389	2.17952	2.77085	2.87391	2.9017	0.398478	0.699476	0.667665
ENSMUSG00000115149	2.53648	2.83404	2.57798	3.94236	3.29724	3.60702	0.958879	0.931297	0.833326
ENSMUSG00000050578	5.65929	4.76945	4.98835	3.76761	2.66706	2.82362	11.967	10	9.58131
ENSMUSG00000020363	3.55756	3.00112	3.84514	2.78709	2.37079	3.05247	0.912354	0.974161	0.9441
ENSMUSG00000108414	21.179	14.884	14.2868	31.4494	24.8192	20.7467	95.4871	66.5322	40.6345
ENSMUSG00000026303	19.9244	22.8962	23.0304	25.6746	28.3485	27.3259	9.6032	11.4202	11.9629
ENSMUSG00000075284	1.2856	1.09974	1.2539	0.941757	1.05022	1.31629	0.220358	0.0766696	0.111074
ENSMUSG00000028378	25.205	19.0068	21.5452	20.7451	15.4781	19.4605	8.10833	6.90301	5.17395
ENSMUSG00000026479	3.91611	4.4873	4.39878	10.1509	11.4265	11.1893	7.42067	7.88338	8.01299
ENSMUSG00000059456	1.77429	2.13686	1.98142	1.99497	2.21033	2.41916	0.618765	0.507037	0.641217
ENSMUSG00000068587	0.126646	0.298132	0.214364	0.141391	0.179495	0.155681	0	0.00703332	0
ENSMUSG00000034435	1.28065	1.02456	1.18402	1.49792	1.13408	0.745996	0.051865	0	0.045213
ENSMUSG00000026825	0.144228	0.266738	0.161859	0.218557	0.11037	0.315684	1.31924	1.14977	2.27398
ENSMUSG00000028412	16.8557	16.6641	17.4474	21.9181	23.7292	22.3053	39.7838	40.4548	37.0631
ENSMUSG00000091709	2.05296	2.98875	2.54099	1.70161	2.44891	2.27362	0.127194	0.260937	0.069137
ENSMUSG00000091455	0.46111	0.667931	0.395016	0.611593	0.678549	0.59976	1.6516	2.30706	2.08761
ENSMUSG00000110195	18.7401	20.3783	16.8306	20.656	20.3206	18.9814	7.65127	5.58514	9.00912
ENSMUSG00000022051	17.8641	16.0367	15.0785	20.021	19.2058	18.6657	41.2891	37.4403	33.4735
ENSMUSG00000081214	11.4953	15.5568	18.7803	32.7861	32.5558	13.2408	187.038	92.8093	60.0138
ENSMUSG00000063931	30.5308	28.4563	30.7249	22.6169	23.7913	21.1207	11.3893	12.6346	8.50371
ENSMUSG00000058908	0.142345	0.328453	0.0910395	1.84592	1.95787	1.87767	0	0	0
ENSMUSG00000038677	1.34716	2.20314	2.06268	2.65501	1.88724	3.61722	0.593478	0.464124	0.578769
ENSMUSG00000023045	0.401919	0	0.254174	0.557056	1.24031	0.872402	9.82509	10.2602	10.3635
ENSMUSG00000060716	3.90231	4.26168	4.31351	4.17474	4.48622	4.83586	1.67515	1.69973	1.54837
ENSMUSG00000019997	132.238	110.411	117.803	251.578	214.418	217.198	92.4104	78.7125	80.2936
ENSMUSG00000074794	1.74512	1.73521	2.07703	2.69951	2.0353	1.24973	8.67976	4.65864	7.4502
ENSMUSG00000038065	0.430265	0.547733	0.353665	0.64482	0.618007	0.546016	2.15286	2.74384	1.62274
ENSMUSG00000020682	5.69648	6.17908	6.49793	7.90549	7.55978	7.15286	13.8541	15.3401	16.187
ENSMUSG00000079343	16.3775	12.3548	13.5082	17.0527	15.1951	14.6385	5.71786	4.79694	3.10503
ENSMUSG00000026227	4.90487	5.07991	4.54649	3.88279	3.29934	4.00061	1.20406	1.19899	0.680446
ENSMUSG00000029482	28.3253	30.3845	32.4868	27.2837	33.9322	31.42	12.4228	14.8765	11.9615
ENSMUSG00000052852	5.68968	4.31663	4.96849	7.01745	5.87247	7.84895	14.1939	14.4706	12.5961
ENSMUSG00000040263	18.5663	18.3952	19.9389	17.26	21.1757	14.9413	6.26923	8.23461	6.52787
ENSMUSG00000032584	1.18618	1.55584	1.65804	2.51232	3.54384	3.85212	0.199553	0.647302	0.3163
ENSMUSG00000004317	33.1431	40.5374	42.9385	28.3458	33.8124	33.4674	12.089	15.6944	14.257
ENSMUSG00000028521	2.84397	2.55327	3.02771	2.52541	2.5479	2.96266	6.59036	6.08824	6.14646
ENSMUSG00000002108	4.12635	3.3005	3.80005	2.47641	2.71873	2.74863	0.680498	0.749759	0.696176
ENSMUSG00000028128	7.61347	5.77352	6.23571	8.02729	7.46417	7.53694	2.43973	2.0344	2.17908
ENSMUSG00000034394	8.48702	10.391	11.2686	10.4053	12.3276	13.544	3.57819	4.72786	4.12112
ENSMUSG00000045136	33.5913	35.8703	36.4377	28.7999	31.1477	31.6406	3.9115	0.496419	3.69922
ENSMUSG00000036285	15.7191	12.2349	12.643	10.9476	9.81067	9.3089	4.98944	4.39664	5.05239
ENSMUSG00000097772	2.82689	2.98834	2.92711	3.48853	2.82868	3.66997	7.33721	8.15211	7.63025
ENSMUSG00000030739	1.78667	3.10799	3.19182	6.98371	9.50729	9.10245	7.41534	11.3009	11.2395
ENSMUSG00000028893	5.92088	6.60219	7.53421	8.8607	10.367	10.6526	16.0068	18.1607	20.6232
ENSMUSG00000024014	5.41552	5.41541	7.89845	15.2372	16.6465	15.9565	16.1695	19.5706	16.7853
ENSMUSG00000030231	3.88711	4.38643	4.21932	5.06594	5.52079	6.01885	9.05986	10.1656	11.356
ENSMUSG00000050965	2.77811	2.60023	2.89543	2.80671	2.87099	2.98586	5.52667	6.4636	7.24072
ENSMUSG00000022090	4.19751	2.8803	2.64572	5.76221	4.12458	4.93439	10.0484	9.79466	10.7168
ENSMUSG00000055653	15.9938	12.2236	14.6911	12.684	8.81698	11.8533	5.2263	4.02699	4.0744
ENSMUSG00000025153	55.2938	85.1721	76.8089	55.2429	72.8915	74.9269	14.2892	22.5182	23.4454
ENSMUSG00000027333	13.0042	16.0569	14.0114	18.5698	19.0055	22.2704	32.9602	35.9576	35.28
ENSMUSG00000022705	6.21661	8.72828	5.81842	4.51062	4.9112	4.87997	0.921119	0.625591	1.51086
ENSMUSG00000027710	6.48848	5.78495	5.29455	5.85842	5.29232	5.00103	2.47714	2.19979	1.95468
ENSMUSG00000001482	12.0137	11.864	12.9305	10.007	11.8412	10.8766	4.52349	5.33757	3.83911
ENSMUSG00000034799	0.964782	1.1135	1.09047	0.951955	1.1078	0.78887	2.23638	2.78064	2.76036
ENSMUSG00000047554	20.2846	16.0418	18.7956	22.889	23.6631	22.2771	10.6116	7.8228	7.47431
ENSMUSG00000020044	8.41889	8.55343	8.40897	15.4946	15.8917	14.9848	18.2889	19.0533	20.0327
ENSMUSG00000037278	62.6687	58.5581	56.1682	39.8902	35.7647	33.5738	23.8807	20.7181	24.7016
ENSMUSG00000030209	0.0555786	0.0804938	0.102213	0.1766	0.231521	0.248912	0.362263	0.568696	0.565417
ENSMUSG00000074158	0.897257	0.981232	0.854917	0.859357	0.907323	0.706149	0.129123	0.0680604	0.0381
ENSMUSG00000114828	0.400829	0.511791	0.407299	0.661435	0.517204	0.249639	0	0	0
ENSMUSG00000085795	15.9672	17.4659	18.4237	26.0264	28.1798	28.4282	38.72	39.1446	49.2646
ENSMUSG00000042599	1.48826	1.84645	1.59629	1.57203	2.47232	2.24421	4.03145	5.67341	4.78391
ENSMUSG00000100212	4.24271	6.6031	6.41243	3.87472	4.83027	5.20669	0.118437	0.342454	0
ENSMUSG00000101892	22.3099	23.0851	20.9936	19.1024	18.8154	19.4517	7.96714	9.25309	9.29245
ENSMUSG00000027456	39.127	33.3372	34.9281	57.4803	54.3913	54.5099	102.232	96.2573	74.2762
ENSMUSG00000020029	147.642	131.347	135.113	140.51	137.758	131.267	62.9092	56.9858	51.993
ENSMUSG00000022419	0.98175	1.49988	1.37691	1.54399	1.97814	1.36333	3.33147	4.2799	4.33959
ENSMUSG00000026395	0.0821151	0.0506406	0.0620489	0.0842058	0.0912253	0.175715	0.00249152	0	0
ENSMUSG00000022962	29.317	29.7118	29.4693	24.2859	26.2409	24.5142	12.6151	14.2566	11.0982
ENSMUSG00000025357	7.99279	8.55622	7.71685	13.2244	13.6051	13.1271	18.4653	19.148	20.2676
ENSMUSG00000040359	4.66609	3.87716	3.70057	5.07304	4.99886	4.33871	9.87009	10.6191	9.46539
ENSMUSG00000090191	1.6614	0.579885	0.812114	1.92326	1.02985	0.871149	0	0.037807	0
ENSMUSG00000021226	2.04031	1.99442	2.17494	1.87951	1.84003	2.35814	6.77998	6.35843	6.47359
ENSMUSG00000028926	0.0353376	0.0378691	0.0222282	0.0656699	0.0766699	0.0460682	0.275861	0.338119	0.24622
ENSMUSG00000018983	1.8991	1.92598	2.21093	2.60671	3.32167	2.59158	5.39565	6.12468	6.09827
ENSMUSG00000027954	7.14906	7.04486	6.92969	12.6427	12.8262	14.4028	19.8436	17.5557	21.9788
ENSMUSG00000027220	2.68615	3.64879	3.37831	2.5878	2.48406	2.61308	0.802713	0.586789	0.818048
ENSMUSG00000030499	1.0268	0.947429	1.18439	1.44057	1.74406	1.79364	4.08173	3.67522	4.05208
ENSMUSG00000038205	1.45081	1.31001	1.11403	1.34975	1.57583	1.4948	4.20196	4.45052	3.37648
ENSMUSG00000028972	0	0	0	0.0430209	0	0	1.11895	0.619341	1.18653
ENSMUSG00000026817	2.46389	2.26103	3.07712	2.81717	1.86156	3.81365	0.498911	0.407439	0.294164
ENSMUSG00000029314	2.12585	1.7964	3.20807	3.22984	3.09377	2.59068	8.41838	7.70144	7.47119
ENSMUSG00000055013	2.95466	3.45514	3.34857	3.07156	3.83556	3.87167	7.51791	6.5847	7.42385
ENSMUSG00000030711	11.6055	10.6296	8.87508	9.35286	7.6105	8.97044	3.10419	2.70255	2.36902
ENSMUSG00000021068	1.06727	1.7173	1.78648	1.12558	1.2559	1.29392	0.292384	0.380631	0.50928
ENSMUSG00000045672	0.736179	1.19345	0.980778	0.34735	0.465698	0.474765	0.165513	0.112354	0.214195
ENSMUSG00000072082	10.1864	9.44551	9.84286	6.65777	6.30769	7.20467	3.82303	4.08342	4.11236
ENSMUSG00000024747	7.13579	6.36184	5.50104	6.73324	4.43794	5.15745	1.36826	1.74838	1.09339
ENSMUSG00000103475	1.12011	1.55241	0.97083	1.29002	1.51345	1.63017	0.080465	0.011216	0.081384
ENSMUSG00000057604	3.78179	3.50594	4.28906	3.31718	3.67659	3.44465	0.133872	0.263687	0
ENSMUSG00000024247	11.6488	11.1842	12.4886	3.56844	3.96584	4.63682	5.91834	6.92039	5.13727
ENSMUSG00000019699	0.536943	0.717898	0.943771	0.821115	0.688662	0.68684	2.43782	2.6673	2.80719
ENSMUSG00000040212	43.6967	37.7992	41.0456	54.539	51.8498	54.5823	21.8741	16.6177	21.751
ENSMUSG00000041781	23.1624	22.2036	23.0515	20.898	21.7664	19.4911	10.766	10.3327	10.4216
ENSMUSG00000027919	1.57912	2.4399	2.14823	1.10908	1.45598	0.997682	0.055837	0	0
ENSMUSG00000020183	7.07341	7.81404	7.70019	4.49339	4.56674	4.40358	10.0124	11.4339	13.591
ENSMUSG00000003665	0.345748	0.414289	0.457407	1.39403	1.57352	1.15438	0.0277002	0.160039	0.0433097
ENSMUSG00000066357	11.2497	14.224	14.0091	10.0813	11.306	11.6851	5.04397	5.51538	4.78994
ENSMUSG00000005378	11.1802	10.8426	10.696	8.32823	7.39645	8.47623	3.99346	4.40477	3.98705
ENSMUSG00000024981	143.104	119.956	127.152	129.901	116.979	124.707	56.0612	51.2143	40.79
ENSMUSG00000039509	14.9968	15.3569	16.2769	11.3151	12.4964	12.1371	6.57314	6.82003	6.97629
ENSMUSG00000047104	2.68846	2.63632	2.93881	8.03342	9.4683	9.42347	2.6828	2.17886	2.47342
ENSMUSG00000017950	1.60128	1.5666	1.95265	0.7085	0.876733	0.762653	0.202162	0.330329	0.294038
ENSMUSG00000035683	23.8852	21.5348	23.8159	20.7101	19.8627	19.1823	9.19503	10.6487	8.76268
ENSMUSG00000028024	0.0335253	0	0.00953208	0.0104045	0.0190473	0	0.673672	0.513733	0.700459
ENSMUSG00000057346	0.690495	0.758028	0.670679	0.821734	0.989921	1.01496	2.39957	2.56805	2.348
ENSMUSG00000032392	1.76526	1.62577	1.68319	2.86097	2.46509	2.20632	5.71163	4.9777	5.42259
ENSMUSG00000062054	2.52602	1.84476	2.20603	3.28349	3.46008	2.88979	8.4577	7.39772	6.4946
ENSMUSG00000017929	54.9178	69.7025	69.4863	53.9935	72.1282	71.7743	23.4875	29.1609	28.5647
ENSMUSG00000041828	0.528854	0.378122	0.420343	0.547644	0.373763	0.75072	0.0554195	0.0339066	0.0413819
ENSMUSG00000026167	3.08093	2.84361	2.38409	4.47105	4.18231	4.34387	0.904984	0.951556	1.00417
ENSMUSG00000037972	3.54232	3.50848	3.82714	3.32517	3.54343	3.82263	1.03752	1.06225	0.982514
ENSMUSG00000003865	10.2018	11.5303	10.6715	9.70638	10.0517	10.9934	20.3584	24.0348	20.0288
ENSMUSG00000028698	3.04168	3.35962	3.17069	1.80228	1.72991	2.02208	0.900347	0.920978	0.616232
ENSMUSG00000040616	9.54411	11.0268	10.529	8.37932	9.05115	8.77281	2.64307	2.13539	3.83382
ENSMUSG00000031762	175.659	145.412	151.595	207.808	210.002	204.994	98.3419	81.413	73.6239
ENSMUSG00000036580	8.86595	8.61579	8.04536	7.74862	7.40835	7.31684	3.52775	3.50838	3.83674
ENSMUSG00000058388	3.42014	3.01957	3.14137	3.46298	3.22781	3.30111	1.20439	1.08388	1.43337
ENSMUSG00000063659	5.9944	3.05624	3.99775	6.84534	5.72145	5.25696	17.5836	17.1742	10.0578
ENSMUSG00000021273	9.39251	8.19316	9.54723	7.17244	5.74213	6.13304	3.69479	2.9116	3.13133
ENSMUSG00000038388	23.1656	18.5977	19.9751	15.1633	14.1103	12.8793	9.40335	8.0746	8.14695
ENSMUSG00000069890	11.627	10.8282	9.47205	12.469	9.91267	10.914	3.81537	3.42807	4.04901
ENSMUSG00000097993	0.419664	0.565894	0.600391	0.470248	0.683934	0.647491	0.0403097	0.0395993	0.0952269
ENSMUSG00000091175	3.27816	1.63499	2.98354	0.009293	0	0.092456	0	0	0
ENSMUSG00000037685	0.17951	0.242699	0.16598	0.313989	0.389618	0.401188	0.796572	0.93276	0.827658
ENSMUSG00000054509	3.30367	4.74527	4.59476	4.15336	4.57558	5.42563	9.12731	10.3836	11.9646
ENSMUSG00000113241	0.85986	0.55843	0.411963	0.361371	0.75685	0.450139	0	0	0
ENSMUSG00000026259	2.30197	2.6966	3.01107	5.3454	5.65238	5.55398	7.19076	7.19365	7.6526
ENSMUSG00000031024	3.70058	4.73496	4.12192	2.6471	3.13235	2.55143	1.34716	1.26475	1.41551
ENSMUSG00000040618	2.72716	2.95214	3.00939	5.60927	6.0307	4.92679	7.80583	8.85527	6.36696
ENSMUSG00000028089	5.91637	5.43415	5.34452	4.50123	4.70198	4.18507	2.07117	1.95571	2.01968
ENSMUSG00000051177	0.705003	0.828249	0.822583	0.741765	0.834918	0.768514	1.71755	2.05641	2.48692
ENSMUSG00000055866	0.208196	0.434397	0.371805	0.195668	0.135332	0.162004	0.950861	1.13417	1.43574
ENSMUSG00000020897	22.5111	18.5606	20.2368	18.0726	15.5882	15.4827	9.10867	7.6227	6.54274
ENSMUSG00000058881	4.50576	5.35419	5.67187	4.05271	4.79044	4.6675	8.23877	12.2489	11.7978
ENSMUSG00000059895	6.02785	6.53428	6.42311	6.46056	5.6346	6.23648	2.66084	3.06502	2.27249
ENSMUSG00000031216	0.861282	0.920978	1.21115	0.882997	0.732416	0.783846	0.158645	0.187293	0.115718
ENSMUSG00000033166	7.28531	7.62393	7.09788	5.71755	5.72143	5.77538	11.7665	12.0467	13.7941
ENSMUSG00000057092	9.50796	2.98552	6.68189	5.70126	8.16143	2.98918	0.956491	0.267729	0.290692
ENSMUSG00000031657	26.5565	26.8882	28.2084	19.6569	20.4731	20.4044	12.1969	12.2639	12.4749
ENSMUSG00000043068	54.4101	54.4927	49.3891	61.4229	63.4248	61.7964	25.7324	30.6443	24.5393
ENSMUSG00000113948	146.786	151.511	120.389	141.334	119.902	146.078	317.037	243.662	292.794
ENSMUSG00000033720	0.260779	0.222174	0.279457	0.180478	0.103343	0.141359	0.752543	0.885305	0.693094
ENSMUSG00000020227	2.02382	2.15246	2.33181	2.83989	2.14942	2.52371	4.85321	6.44254	9.03256
ENSMUSG00000028716	0.546651	0.898462	0.729396	0.281483	0.462611	0.192797	0	0	0
ENSMUSG00000027671	21.1511	18.8277	20.5076	18.6114	16.1015	17.8494	9.04177	9.31043	8.65914
ENSMUSG00000031788	9.24632	12.0361	11.1505	15.8098	19.4239	17.641	6.21543	7.79209	7.39974
ENSMUSG00000063193	0.560643	0.511425	0.485896	1.1195	1.25569	0.908362	2.86116	2.8439	2.33738
ENSMUSG00000007888	25.8815	24.7312	23.7733	40.7839	45.7083	43.7013	17.6365	19.0251	19.4732
ENSMUSG00000025192	3.59445	4.57353	4.75677	2.96318	3.43625	3.77071	1.39455	1.64245	1.72133
ENSMUSG00000045545	90.165	93.7133	94.0403	107.039	127.253	124.225	51.735	57.6694	48.4992
ENSMUSG00000051650	16.9472	14.7924	15.5873	20.054	17.4467	17.6307	9.01579	7.0749	6.02363
ENSMUSG00000013846	15.4996	16.6869	15.8579	15.2347	16.6968	16.7185	28.6654	30.9172	32.919
ENSMUSG00000028039	0.679616	0.483104	0.766687	0.656943	0.633911	0.358834	2.58327	3.03926	2.94294
ENSMUSG00000035165	4.84418	3.55246	3.53677	3.99309	3.59284	3.60011	0.309776	0.905103	0.596409
ENSMUSG00000057836	6.54458	4.7713	5.8388	8.03953	6.61028	6.33079	20.1382	16.3509	11.2987
ENSMUSG00000031770	17.6331	22.267	22.2809	41.6087	38.6476	36.8218	46.8911	45.0517	52.3598
ENSMUSG00000074336	3.53687	3.17157	3.30167	3.3443	4.28713	2.96853	1.00478	0.748912	0.641935
ENSMUSG00000044313	0.782756	0.775573	0.801078	0.876017	0.958553	0.874718	0.0358944	0.0467961	0.123549
ENSMUSG00000028587	9.36816	8.54484	8.66533	6.95192	6.16578	6.36358	3.57351	3.26755	3.25079
ENSMUSG00000027737	2.44365	3.17257	3.1226	6.24707	7.68771	7.89997	4.83094	6.11485	5.92329
ENSMUSG00000014599	27.8127	28.3361	28.663	18.4275	17.6652	17.9928	12.1529	12.9207	7.76707
ENSMUSG00000024990	195.444	149.698	155.684	91.4832	74.3504	76.6683	85.8685	72.8651	57.2388
ENSMUSG00000041075	13.6001	14.3488	13.2882	10.4347	11.6925	10.3278	22.5263	23.4626	23.3742
ENSMUSG00000058624	0.116375	0.114739	0.106986	0.207041	0.129262	0.111929	0.821435	0.634796	0.853309
ENSMUSG00000022351	27.4261	24.1486	24.3691	14.904	13.7539	13.506	13.2095	12.0382	11.1305
ENSMUSG00000016559	180.124	141.039	150.728	225.549	202.705	199.277	512.969	428.596	365.628
ENSMUSG00000041935	9.54838	10.5194	9.54876	15.603	15.4931	15.3424	22.1995	21.8703	20.8459
ENSMUSG00000092203	39.5144	28.2378	37.3175	31.7561	27.7108	25.0046	92.6759	71.9381	55.081
ENSMUSG00000029802	9.5584	7.54882	8.35424	8.93009	7.21726	7.51467	3.83028	3.52415	2.50266
ENSMUSG00000040473	1.07889	1.00696	1.26479	1.0813	1.05733	1.09831	0.294759	0.278905	0.303795
ENSMUSG00000053253	1.4016	1.52299	1.78616	1.78327	1.49523	1.70123	3.57752	3.17831	4.09978
ENSMUSG00000028195	64.0792	70.0403	71.4104	57.3438	62.1624	61.3083	29.0345	30.0732	35.8497
ENSMUSG00000031594	4.84494	4.00401	4.63296	1.78806	2.27085	1.67666	6.95139	5.76712	4.80523
ENSMUSG00000032554	175.998	148.577	172.894	115.037	100.55	104.193	74.3022	58.5243	45.989
ENSMUSG00000028047	1.3172	1.55567	1.32038	1.25305	1.03936	1.1302	0.232418	0.32087	0.248648
ENSMUSG00000020038	3.98677	3.05747	2.91735	2.01292	2.54776	2.10456	7.48368	6.9151	6.23668
ENSMUSG00000111243	1.98428	1.38477	2.69725	1.84541	1.35684	3.54348	0	0	0.095267
ENSMUSG00000021850	1.08435	1.00376	0.971764	0.208977	0.0507737	0.212712	0.0132191	0	0.0459859
ENSMUSG00000025921	18.1183	16.3415	16.8689	27.5074	25.4183	26.2736	12.3344	12.3418	10.1554
ENSMUSG00000041355	71.9971	77.8424	61.3598	38.7065	52.6132	35.4486	144.261	86.8962	130.27
ENSMUSG00000031661	70.6367	68.421	65.9044	85.218	86.1897	85.8276	34.806	32.7945	41.7722
ENSMUSG00000037395	1.06068	0.919369	1.13637	1.3051	1.44415	1.38015	2.15378	2.98718	3.01537
ENSMUSG00000028064	4.68759	5.57828	5.75546	5.47331	5.75901	5.85227	10.2711	11.7159	12.8954
ENSMUSG00000023832	7.9184	4.20764	7.15561	4.35453	3.82021	4.28768	0.883624	1.74833	0.825375
ENSMUSG00000048373	12.3352	10.1619	9.11214	8.29187	6.73175	6.50893	3.74013	3.05482	3.15212
ENSMUSG00000024621	0.330451	0.40334	0.52443	0.444855	0.672324	0.361817	0.0413353	0.0403591	0.0387202
ENSMUSG00000021178	128.674	111.237	107.577	109.408	91.2673	95.5875	56.8734	48.2036	45.7151
ENSMUSG00000043029	1.24774	0.883474	1.43552	1.46419	1.99128	1.48574	0.313997	0.341378	0.366752
ENSMUSG00000090272	0.858436	0.599538	0.569776	0.367824	0.273218	0.28206	1.97505	1.75862	1.73841
ENSMUSG00000046718	85.2302	60.8994	64.6101	87.688	75.4091	75.3454	35.7948	30.7555	30.8872
ENSMUSG00000039191	12.1542	12.2623	12.4575	14.2672	15.8558	15.9568	22.9262	28.0481	29.1951
ENSMUSG00000024028	365.487	270.419	299.085	388.575	347.104	334.239	168.626	127.028	91.9686
ENSMUSG00000053332	17.5718	13.0823	14.4801	19.5141	12.9202	19.1489	63.5686	37.7886	30.3153
ENSMUSG00000052131	0.017743	0	0	0.11938	0.123856	0	1.69213	1.38411	1.62298
ENSMUSG00000042677	9.1368	10.8692	10.4603	9.32266	9.25518	8.95882	2.90805	4.20164	4.27291
ENSMUSG00000027536	9.27615	11.1382	10.6882	11.5852	13.1479	12.4291	4.8389	5.87814	5.9063
ENSMUSG00000044254	95.7461	87.1631	98.223	79.5971	86.6393	87.9341	40.8878	47.5471	36.6209
ENSMUSG00000063011	5.9535	5.57504	6.95969	11.3054	12.7822	13.4434	16.0244	17.4906	13.2993
ENSMUSG00000033060	10.6483	14.5596	12.9842	12.0521	14.1294	13.8543	22.6641	28.8002	31.9432
ENSMUSG00000029378	4.66538	2.83791	3.80399	14.2654	10.5328	9.97627	14.152	14.0025	12.4567
ENSMUSG00000042349	14.6515	17.1136	17.0647	14.8267	17.3845	17.0872	6.68629	8.36386	8.42241
ENSMUSG00000021242	50.1244	40.1214	43.3347	43.4612	38.7818	39.1157	19.8491	17.0243	9.58892
ENSMUSG00000020019	1.92898	1.74601	1.42665	4.03224	3.94607	4.84445	4.97099	5.34843	5.14623
ENSMUSG00000005481	51.1776	40.102	45.5004	39.7181	40.2928	40.2592	20.999	20.0231	12.5557
ENSMUSG00000021948	7.078	7.3555	6.70738	7.36737	7.76171	7.78282	13.2133	15.1031	15.1164
ENSMUSG00000024899	3.089	3.3617	3.16277	2.4306	2.8114	2.57586	0.624507	1.02545	0.867634
ENSMUSG00000024885	0.59468	0.731394	0.944893	0.59529	1.25151	0.900508	3.20562	4.12747	3.89279
ENSMUSG00000053279	229.18	166.916	186.188	185.59	157.961	150.492	73.5386	70.1396	45.9559
ENSMUSG00000020883	2.81331	2.75955	2.69798	4.68665	5.52667	5.28323	5.53295	6.50151	6.40323
ENSMUSG00000071745	2.4292	2.6226	2.27757	1.8106	1.06698	2.5595	5.77449	9.03317	6.72921
ENSMUSG00000020826	0.0407603	0.0728505	0.311148	0.0114919	0.0699655	0.214542	1.83733	2.07729	2.82265
ENSMUSG00000079534	0.923755	1.51096	1.36738	1.25668	1.80647	1.75663	4.44704	5.11943	4.39636
ENSMUSG00000006732	6.29979	7.75164	7.3838	7.18605	7.8504	7.23306	12.608	17.6353	20.2587
ENSMUSG00000022385	24.033	25.4941	26.8718	14.8547	18.6005	16.4384	9.89516	10.778	11.312
ENSMUSG00000052837	129.381	121.345	124.624	191.286	183.415	201.135	87.6809	84.7138	90.775
ENSMUSG00000051220	8.29129	9.1928	9.39784	6.47833	6.74942	6.06221	3.59851	3.27737	4.06244
ENSMUSG00000043013	1.10472	1.94915	1.78235	0.334941	0.435585	0.197762	0.1535	0.180277	0.343611
ENSMUSG00000039529	0.414586	0.404464	0.744865	0.793918	0.741111	0.71414	0.092217	0.062678	0.119769
ENSMUSG00000020326	107.593	99.3505	101.331	93.6517	92.4397	90.7311	50.1484	46.4186	46.28
ENSMUSG00000056492	16.9521	20.1083	19.807	25.6664	26.9353	27.8191	9.3804	11.7606	13.0113
ENSMUSG00000012350	26.101	26.1804	25.4919	27.7028	29.9177	29.0958	13.5017	15.0048	14.2414
ENSMUSG00000058216	11.2815	9.00411	9.73499	16.4125	16.0836	16.2606	5.00554	4.85852	3.75822
ENSMUSG00000030413	213.952	140.35	166.541	224.074	208.019	203.943	91.6935	73.6951	50.1254
ENSMUSG00000086591	3.96744	2.17608	3.41664	3.02108	4.20058	2.23945	0.268765	0.09868	0.314859
ENSMUSG00000021125	3.92136	4.33449	3.08024	2.07882	1.11707	1.71897	0.571541	0.481522	0.431191
ENSMUSG00000063253	19.8299	18.874	18.3319	17.6402	17.4847	15.9375	9.21239	5.57314	8.18709
ENSMUSG00000014837	0.154718	0.371836	0.172178	0.409705	0.304368	0.314027	1.52255	1.47693	1.46343
ENSMUSG00000024978	1.5916	2.07558	1.98686	0.425405	0.476611	0.439102	0.66093	0.861584	0.406944
ENSMUSG00000024486	17.1362	15.5823	15.4222	29.6758	26.8263	25.9524	13.8198	13.1365	12.8079
ENSMUSG00000021118	22.9502	21.5145	21.8387	26.6548	23.4228	25.16	10.598	9.96773	11.5003
ENSMUSG00000041645	14.6885	15.687	15.3555	8.55787	12.9528	13.0428	6.25402	6.35792	6.31124
ENSMUSG00000053470	5.72747	6.2114	5.84152	6.32711	6.0278	7.19608	11.1718	11.3955	14.3166
ENSMUSG00000027864	16.441	19.7239	19.5422	16.2191	19.0073	18.0295	7.45182	9.6756	8.79515
ENSMUSG00000006958	0.332117	0.243013	0.217194	0.429895	0.325501	0.572932	1.25317	1.52132	1.19125
ENSMUSG00000065979	7.79547	7.53137	8.82603	6.03646	5.88618	6.24752	3.2098	3.12536	3.61173
ENSMUSG00000028300	5.15061	5.2021	4.57633	6.20661	5.87316	6.70951	12.9511	12.0025	9.66882
ENSMUSG00000042029	10.1373	11.0527	12.1229	10.915	11.696	12.2441	5.09971	6.34968	4.74776
ENSMUSG00000025403	55.9841	57.481	55.0802	62.2855	64.5899	61.4555	104.818	110.077	124.317
ENSMUSG00000025742	14.7546	12.3727	12.971	12.9538	12.7423	13.2521	6.45988	6.22947	5.59621
ENSMUSG00000038949	3.83348	4.04424	4.1187	4.73566	4.83112	5.25214	8.37271	8.22212	9.08242
ENSMUSG00000023030	12.7056	12.6588	13.9126	12.9178	15.0139	14.6518	6.09951	7.5305	6.10467
ENSMUSG00000022788	0.186222	0.205087	0.259688	0.151585	0.226454	0.220051	0.0263899	0.0134871	0.0356282
ENSMUSG00000031985	23.5552	21.6891	19.857	18.1485	17.036	17.3982	9.86655	10.5757	8.547
ENSMUSG00000051339	3.68743	5.80065	5.95464	4.74779	6.65842	6.44261	1.67409	2.51206	1.46324
ENSMUSG00000043263	3.25548	3.19113	3.56481	5.24801	4.39692	5.71463	1.61837	1.70151	1.58098
ENSMUSG00000035329	6.18229	6.3124	5.13223	5.46008	5.09265	5.6382	2.59633	2.32648	2.22034
ENSMUSG00000035172	3.82529	3.35851	3.76582	5.01625	5.42247	5.74607	8.7674	11.6258	8.16455
ENSMUSG00000036672	10.9232	10.7653	9.81773	8.4547	7.81672	7.21048	3.99671	4.0436	4.82539
ENSMUSG00000058672	125.188	118.498	120.549	88.4612	97.5297	92.9614	55.0153	63.0526	45.2095
ENSMUSG00000098557	3.1049	3.99085	2.9321	0	0	0	3.75091	4.06267	0
ENSMUSG00000027993	1.02274	1.12929	1.28786	2.00461	2.22034	1.94324	2.63793	2.8853	2.59256
ENSMUSG00000032487	0.318887	0.322914	0.133643	0.29353	0.267044	0.41423	0	0	0.0098423
ENSMUSG00000085830	0.073108	0.139596	0.093103	0.350067	0.363791	0.502177	0	0	0
ENSMUSG00000006575	3.69935	4.74041	4.05033	3.85922	5.14751	3.37187	9.52221	9.95948	10.1655
ENSMUSG00000052373	0.00836606	0.015997	0.0180728	0.0305381	0.0335805	0.0450357	0.243324	0.274529	0.215891
ENSMUSG00000071226	0.0122099	0.0142618	0.0106697	0.000407697	0.0403447	0.0135637	0.224334	0.262761	0.284164
ENSMUSG00000041886	1.87293	2.25068	1.93983	1.4299	1.40168	1.64462	0.568533	0.333277	0.684307
ENSMUSG00000044469	1.93602	2.00785	1.91133	1.99632	1.97473	1.8886	0.586579	0.682533	0.677263
ENSMUSG00000074280	133.153	107.697	112.36	76.8311	56.6771	61.9469	53.8266	34.9095	40.4034
ENSMUSG00000024357	3.52076	3.86554	3.88745	4.9056	3.69038	4.09989	8.92225	8.35355	9.04198
ENSMUSG00000018166	4.33109	4.78509	5.03458	7.0161	9.51656	9.80889	10.0508	12.0761	13.4347
ENSMUSG00000034667	18.4515	18.5756	19.2388	23.4134	24.2777	24.7735	37.8692	41.6796	35.6873
ENSMUSG00000038151	2.52331	2.41614	2.73458	6.24679	5.8316	6.89033	3.81058	4.28309	4.5191
ENSMUSG00000031906	14.5332	19.0659	17.7686	16.3058	19.3292	21.3512	5.37682	8.44063	8.65209
ENSMUSG00000056216	13.3544	11.772	12.7114	20.5089	20.6981	17.851	33.9041	34.3683	22.1796
ENSMUSG00000041773	55.3291	56.4676	56.6566	66.7344	69.2064	71.24	31.8651	33.7129	31.7091
ENSMUSG00000047638	1.57146	1.10146	1.00749	0.643829	1.14669	0.610046	4.3673	3.54255	3.80256
ENSMUSG00000043004	0.064927	0.20798	0.0408746	0.0727306	0.0817465	0.0780155	1.0136	0.813532	0.743974
ENSMUSG00000085133	0.14167	0.169724	0.318391	0.386922	0.433487	0.51573	1.14673	1.30611	1.57336
ENSMUSG00000026626	5.8654	5.77543	5.65439	5.79826	5.46774	5.24315	10.5205	10.7132	10.22
ENSMUSG00000024594	5.17914	5.63852	5.43654	6.40521	6.59386	6.5423	10.0661	11.3829	10.9632
ENSMUSG00000048458	5.74975	5.36079	5.26006	4.44381	3.68278	3.93091	2.22266	2.0252	2.09042
ENSMUSG00000052861	2.27357	2.50664	2.35762	1.39972	1.22402	1.16328	1.017	0.822999	1.07883
ENSMUSG00000020484	16.6174	14.3232	14.1871	17.7299	15.8625	18.4299	34.9434	39.6412	25.505
ENSMUSG00000031430	1.78718	1.83311	1.14393	1.49119	1.54643	1.54234	0.214615	0.183854	0.356381
ENSMUSG00000004043	3.65918	4.72277	4.72384	5.29175	5.57944	6.61234	8.74737	11.1429	11.0364
ENSMUSG00000058240	5.28017	4.91799	5.60921	5.95322	6.72383	5.69162	14.5911	14.0435	9.06213
ENSMUSG00000028675	25.6732	20.935	22.2446	36.1002	35.3743	31.6462	58.0176	52.0152	44.1673
ENSMUSG00000036752	175.679	166.042	164.411	135.499	133.617	124.817	83.175	77.0439	74.0241
ENSMUSG00000046318	0.27093	0.274567	0.251499	0.188946	0.227584	0.109169	0.0140869	0.0274888	0.0208094
ENSMUSG00000056025	0.368928	0.0887138	0.109667	0.241905	0.233907	0.477212	0	0	0
ENSMUSG00000021067	27.5442	24.4043	25.2318	22.1575	19.662	19.5829	12.2007	12.1127	12.8173
ENSMUSG00000022218	1.45046	2.03814	1.56035	1.36523	1.71696	1.73192	0.347075	0.407894	0.258361
ENSMUSG00000039908	2.24826	2.64247	2.05464	3.24993	3.7475	3.86345	6.13599	7.27651	6.08019
ENSMUSG00000116024	0	0.0187884	0.000318596	0.000589876	0.201374	0.00112061	1.02535	1.07644	3.1588
ENSMUSG00000041313	18.7498	24.4058	24.8428	32.3597	40.5791	39.3016	48.2973	63.4498	65.6568
ENSMUSG00000032289	4.21464	6.58412	6.23875	4.79556	6.47219	6.38145	9.61107	14.814	16.2898
ENSMUSG00000037419	15.8117	16.1516	15.1312	24.8021	25.9988	25.8464	13.137	12.079	12.839
ENSMUSG00000069135	4.38533	4.45222	5.17921	8.44904	7.3244	8.37491	2.05293	2.59103	3.69075
ENSMUSG00000036368	4.10787	3.1609	3.91071	4.23889	3.49809	3.88769	1.26019	1.51206	0.816745
ENSMUSG00000052271	0.075613	0.296947	0.038518	0.059626	0.038	0.039957	0.869329	0.991507	1.08176
ENSMUSG00000030867	62.7838	66.5338	68.4948	44.8134	44.5947	43.5907	28.3082	27.0448	36.4437
ENSMUSG00000042699	77.2926	85.9631	86.3604	71.9522	75.4749	74.7406	34.3346	35.9542	36.5212
ENSMUSG00000006356	80.2371	68.4143	74.8332	75.0981	113.855	73.2251	42.0928	32.8752	28.8417
ENSMUSG00000033863	12.334	16.3209	15.0704	17.9898	19.1612	20.3548	27.2095	32.7403	33.3017
ENSMUSG00000032254	11.078	11.5953	11.0356	10.0714	9.84736	9.89246	5.3993	5.10372	5.86407
ENSMUSG00000047250	31.1226	27.1687	27.239	40.6256	38.2638	38.5539	19.2475	19.0182	18.7288
ENSMUSG00000021185	8.76947	12.1241	11.3112	8.5256	9.25317	9.612	4.36956	4.91478	4.41514
ENSMUSG00000031349	7.66444	5.69181	5.91016	4.48469	3.90766	2.96213	2.14529	1.74737	1.8266
ENSMUSG00000079652	1.8057	2.64821	1.64074	1.77529	1.88999	2.00603	6.23517	5.95868	9.15673
ENSMUSG00000012428	2.63662	1.95815	2.10332	2.18635	1.74306	1.69687	0.602436	0.436331	0.313274
ENSMUSG00000039740	19.5548	14.8696	15.9397	18.3981	15.2344	16.7412	37.4726	36.0569	28.0258
ENSMUSG00000026271	0.0543274	0.0179968	0	0.0215263	0.0463105	0.0397382	0.508524	0.632781	0.643383
ENSMUSG00000022407	10.9415	10.8454	11.2415	11.0041	10.9165	9.87413	4.58348	5.93693	4.88445
ENSMUSG00000039231	26.7716	25.4651	25.5035	17.6766	19.029	20.2651	12.6159	13.3026	11.5426
ENSMUSG00000010755	11.5262	11.3248	12.3342	21.1702	20.1056	19.7275	22.405	23.7822	23.1778
ENSMUSG00000055053	6.09848	7.50164	7.12491	10.639	12.6079	12.98	13.4405	16.0959	21.7869
ENSMUSG00000041028	58.273	48.0256	48.5763	62.638	56.8213	57.3233	130.229	120.869	88.2899
ENSMUSG00000073418	1.26133	1.48291	1.48494	1.92459	1.86937	1.93033	0.588207	0.519845	0.52251
ENSMUSG00000031400	47.4517	46.0431	41.528	35.9545	34.8728	31.4804	70.5922	65.0261	73.9406
ENSMUSG00000030002	13.3009	14.8921	14.4082	15.1563	15.508	15.9693	25.4203	27.8924	28.0068
ENSMUSG00000027896	3.41379	2.87293	3.29007	3.93105	3.09963	3.92469	7.91518	7.65818	6.78088
ENSMUSG00000024238	2.1304	2.86001	2.55947	1.62639	2.44375	2.65342	4.58934	5.39238	6.46787
ENSMUSG00000031824	1.76837	1.70373	1.49075	2.04082	2.67945	2.4121	3.76562	4.17829	4.81212
ENSMUSG00000037936	9.79539	10.6672	10.2165	8.41342	9.50202	9.93251	4.73426	4.41829	5.49289
ENSMUSG00000024912	6.62536	8.19596	5.84864	12.6791	12.5148	11.8215	20.3988	14.3978	32.7274
ENSMUSG00000097415	22.3235	18.7753	18.1543	15.6414	15.8164	14.4146	9.74415	8.05059	7.07377
ENSMUSG00000029363	16.5644	13.9448	13.9126	13.3582	13.0769	12.4503	7.7941	5.97171	6.07208
ENSMUSG00000035021	22.2275	23.9275	24.6747	20.7892	22.9423	22.2407	10.0983	11.325	13.5016
ENSMUSG00000030319	0.140008	0.282305	0.171665	0.280597	0.227961	0.423867	1.21112	1.00299	1.171
ENSMUSG00000085385	7.97624	6.26188	6.82397	10.0744	10.2067	10.1005	17.3089	16.4981	12.892
ENSMUSG00000001053	12.2523	11.7962	11.8586	18.125	19.5225	18.6768	8.17555	8.89985	8.68893
ENSMUSG00000031639	1.65949	2.66168	1.54259	0.859468	1.06947	1.32564	0.483503	0.240635	0.3608
ENSMUSG00000035964	7.60183	5.39768	6.0885	7.47937	5.27994	5.37867	1.43186	0.986295	2.16419
ENSMUSG00000044894	38.0614	30.0133	38.7066	36.8912	32.8963	32.6444	88.1621	71.1533	56.3952
ENSMUSG00000069769	2.99189	3.42819	3.39125	3.88753	3.77883	3.71354	6.74589	6.25707	7.25866
ENSMUSG00000042303	5.06617	5.46824	4.97379	3.78731	4.37332	4.12215	1.68794	1.98507	2.27625
ENSMUSG00000041703	3.77386	4.08969	3.29246	2.91382	3.52633	2.9489	6.78573	6.91687	7.66763
ENSMUSG00000083847	4.38769	6.22658	3.88575	4.99343	2.17343	4.0433	19.2377	18.8022	12.0791
ENSMUSG00000097316	0.877844	1.05026	0.670894	1.5826	1.25503	0.998044	3.27426	3.1178	4.2257
ENSMUSG00000048249	1.85107	2.33571	2.15719	4.05381	4.45136	4.33188	4.33879	5.59822	4.73459
ENSMUSG00000021114	20.3115	16.3364	16.1261	16.8356	13.5287	13.3358	8.25553	6.76794	8.03419
ENSMUSG00000076441	62.4469	60.3564	54.931	54.2522	53.8227	52.6866	34.009	25.7677	26.4056
ENSMUSG00000048388	1.47468	2.04202	1.96518	1.78025	2.15157	1.84102	3.59644	5.0178	4.97176
ENSMUSG00000041712	19.6331	18.4828	18.2253	20.1473	19.5025	20.0228	10.1668	10.0047	7.77296
ENSMUSG00000027933	16.5303	19.3978	19.8044	15.4194	17.4349	16.9089	7.13953	8.06137	10.306
ENSMUSG00000075555	0.300458	0.358738	0.365159	0.486645	0.664968	0.285401	0	0	0
ENSMUSG00000005410	51.9352	53.8138	53.9117	40.8264	40.6346	44.8797	25.7151	27.4061	25.0052
ENSMUSG00000053617	8.25878	10.9525	10.0808	11.8792	14.3692	14.4065	4.45552	6.27419	6.53466
ENSMUSG00000041992	0.189879	0.147228	0.0978155	0.164067	0.108241	0.0725087	0.00608108	0	0
ENSMUSG00000039304	0.552077	0.554364	0.701449	0.6309	0.925549	0.725986	0.121438	0.119845	0.050607
ENSMUSG00000017697	8.47473	8.62177	8.69798	6.59343	5.82557	6.08248	2.90404	2.1106	3.2719
ENSMUSG00000005374	5.3291	5.28791	5.01142	3.55638	3.91967	3.91649	7.67341	9.35094	7.85398
ENSMUSG00000078899	0.200045	0.106349	0.129973	0	0	0	0.959968	0.018865	0.522418
ENSMUSG00000041046	5.74886	5.70666	5.25949	6.13581	7.07247	6.02189	1.85653	1.68809	1.91146
ENSMUSG00000047534	5.68784	6.86002	7.04148	5.99458	5.63141	4.92302	2.74258	2.47325	3.21954
ENSMUSG00000006736	47.0442	45.3775	50.1405	54.9234	49.6187	53.0739	94.5886	83.8922	88.2698
ENSMUSG00000020532	5.46165	8.04956	7.93738	5.77492	7.44222	7.60755	2.28834	3.20384	3.4947
ENSMUSG00000005951	3.67815	2.62507	2.78927	8.04823	7.70908	7.75058	6.46274	7.67792	6.06775
ENSMUSG00000024359	189.357	161.167	167.824	201.245	178.292	180.659	459.472	405.321	352.585
ENSMUSG00000026473	98.4904	104.012	95.794	48.1161	50.0887	50.3603	58.277	58.795	64.872
ENSMUSG00000026638	6.18702	5.93236	6.10286	7.3962	7.54266	6.81191	3.08447	3.66674	3.20619
ENSMUSG00000021213	17.6729	14.216	14.7834	28.6141	20.8767	23.1423	41.8869	34.9371	35.0544
ENSMUSG00000029338	6.60254	6.10785	5.91013	8.67803	7.17455	7.34003	13.451	12.3616	12.3546
ENSMUSG00000040675	10.1599	11.3273	10.2306	10.2523	11.8868	11.5052	19.0387	21.4266	20.3981
ENSMUSG00000081904	0.448995	1.00253	1.27415	3.32543	0.909027	2.58668	12.7734	11.3107	11.8052
ENSMUSG00000052539	9.30243	12.0802	11.866	9.85409	10.6533	10.1945	16.5515	21.25	24.8277
ENSMUSG00000027531	7.70179	7.085	8.21771	7.73576	8.12635	6.88939	3.82579	3.73981	2.76174
ENSMUSG00000041789	0.199061	0.105755	0.417894	0.822184	0.29994	0.279266	0	0	0
ENSMUSG00000058756	2.88294	3.43048	3.64921	3.89359	4.42267	4.3093	6.56297	7.9991	8.67107
ENSMUSG00000027630	4.3297	4.44644	4.87507	5.77281	5.37526	8.37885	2.02443	2.9098	2.50713
ENSMUSG00000026864	149.74	128.074	140.279	145.75	132.842	127.622	326.634	338.941	246.239
ENSMUSG00000019256	8.43126	9.95745	9.84792	13.3703	14.3228	14.3802	18.3702	19.2702	20.6315
ENSMUSG00000030107	11.2997	8.7791	10.3387	18.8848	17.4378	16.4233	30.4949	24.5596	19.7236
ENSMUSG00000025237	1.69244	1.7597	1.44188	2.22493	2.00035	1.90711	3.97393	3.53017	3.8527
ENSMUSG00000095180	340.974	319.871	303.581	283.001	247.685	252.021	173.043	148.154	140.118
ENSMUSG00000051375	12.2038	14.9683	14.5356	16.4402	18.7006	22.3028	25.7595	31.2176	36.145
ENSMUSG00000000738	10.7613	9.60879	9.78301	10.9104	12.144	10.7291	5.24712	5.67012	4.70516
ENSMUSG00000022557	31.4449	33.7306	35.1144	25.0467	28.2847	29.1937	12.3233	15.9363	17.6074
ENSMUSG00000070044	24.6692	28.3204	25.6727	18.9816	19.8837	20.4571	11.6706	12.0547	14.5313
ENSMUSG00000039601	4.86902	5.47464	4.3407	2.80928	2.65268	2.39984	1.38655	1.23976	2.12076
ENSMUSG00000024803	135.06	125.832	120.79	164.09	143.588	143.991	71.5411	63.2348	74.2458
ENSMUSG00000042675	3.57756	4.41439	1.90596	8.59665	7.15238	8.06205	11.7501	12.4433	10.8518
ENSMUSG00000048371	6.24371	7.71667	6.56666	3.0899	4.08268	3.83826	2.55142	3.30271	3.00113
ENSMUSG00000029547	15.5228	21.4327	22.8291	14.7304	19.2433	19.4022	5.95443	8.3741	9.85229
ENSMUSG00000110218	1.32628	1.04929	1.51771	0.718461	1.09484	0.780397	3.82369	3.55009	6.32153
ENSMUSG00000038602	0.339871	0.562647	0.318921	0.992309	0.848825	0.936811	0.118937	0.085899	0.159494
ENSMUSG00000024776	4.3924	4.376	4.01452	5.38381	4.85102	5.65507	9.52404	7.88203	10.2953
ENSMUSG00000028164	9.87034	9.31103	9.36295	11.9195	12.0657	11.0769	5.92326	5.82569	4.87243
ENSMUSG00000029250	27.0277	25.6471	26.5929	21.6146	20.0932	20.7557	12.8455	12.9949	13.9165
ENSMUSG00000071637	7.77621	9.58136	8.07195	5.06719	4.36287	3.75249	1.52128	0.228784	1.51267
ENSMUSG00000090362	0.0626859	0.0853856	0.0621586	0.225375	0.230237	0.245681	0.023491	0.0119145	0.034315
ENSMUSG00000070436	0.901166	0.615677	0.836019	1.21656	1.66385	1.72492	0.104214	0.0173487	0.166065
ENSMUSG00000020893	1.49649	2.18125	1.72236	2.14091	2.08344	1.92708	3.82669	4.68154	4.8538
ENSMUSG00000034111	4.68908	5.89397	5.95111	4.35758	5.66291	5.50812	1.99041	2.80419	2.15374
ENSMUSG00000074578	37.0318	21.3587	29.0328	46.8276	33.2528	34.1973	183.824	118.417	45.3173
ENSMUSG00000115160	0.723183	0.552602	0.504862	0.607809	0.45189	0.754857	6.45755	3.57555	4.31078
ENSMUSG00000031642	17.5452	22.4184	22.6403	20.1067	24.3883	26.1292	8.54415	10.7336	12.5157
ENSMUSG00000066235	1.60926	2.18924	2.01637	1.78626	1.73431	2.04696	0.495687	0.446195	0.507006
ENSMUSG00000064373	110.612	109.125	105.185	60.9256	61.4105	55.4762	53.6177	54.3504	66.3067
ENSMUSG00000028851	101.655	98.0693	94.8017	88.0591	77.7778	83.6865	47.8341	45.0496	54.8183
ENSMUSG00000021196	3.61912	5.33609	4.39963	3.80959	4.29586	3.78453	6.68161	11.4986	8.88523
ENSMUSG00000008090	1.97367	1.42158	2.23623	3.29304	3.69986	4.32644	5.38179	6.6046	6.20906
ENSMUSG00000087370	2.56934	1.62886	0.802153	0.274259	0.359448	0.0767951	3.29642	3.40328	1.15335
ENSMUSG00000117399	0.797099	0.515653	0.556366	0.229287	0.151347	0.27162	0.0353797	0.0145162	0.0153846
ENSMUSG00000031557	4.44956	6.21426	16.6735	15.6054	16.2938	16.0839	3.2027	3.79066	3.38997
ENSMUSG00000026447	0.696101	1.20385	1.10724	0.940642	1.30334	1.94269	2.20382	4.02077	4.51374
ENSMUSG00000007827	6.66705	9.12573	9.09122	5.84118	7.96514	7.37931	2.79943	3.97362	3.3264
ENSMUSG00000054263	20.1056	27.3776	27.3001	29.519	37.1848	37.244	49.0034	68.3465	64.576
ENSMUSG00000022805	0.351825	0.353045	0.295643	0.197166	0.0897305	0.0797038	1.224	0.923491	0.787409
ENSMUSG00000020099	15.9681	19.1549	19.6884	17.2455	20.8614	20.9819	30.1215	38.7172	38.9296
ENSMUSG00000028132	0.176931	0.110445	0.0623082	0.280841	0.176815	0.238012	0.645854	0.788242	0.76598
ENSMUSG00000029134	0.556583	0.790914	0.80736	1.45061	1.27533	1.4371	1.67373	1.99577	2.32974
ENSMUSG00000027160	3.76762	3.84847	3.84962	3.44987	3.43849	3.67472	1.6758	1.6363	1.82312
ENSMUSG00000033186	8.51156	5.89072	8.9618	11.0475	9.76275	9.37736	22.4673	19.7341	15.2486
ENSMUSG00000020900	18.3467	28.8299	27.799	21.0716	27.5494	26.9216	7.18197	11.6609	11.5983
ENSMUSG00000022358	2.08404	2.25649	1.61114	4.36222	4.71434	4.17691	2.17717	2.32864	2.10527
ENSMUSG00000113679	0.375407	0.370533	0.264059	0.348231	0.732965	0.620948	0.0591904	0.0668557	0.0275481
ENSMUSG00000015289	18.583	17.1665	16.573	14.7278	14.5831	13.8999	8.98264	6.28092	7.01784
ENSMUSG00000032939	35.0563	34.4628	32.3649	27.246	25.5227	24.2974	17.3617	16.5102	17.7928
ENSMUSG00000001918	34.1399	33.6372	34.159	33.9262	34.432	37.75	60.7566	64.393	58.4901
ENSMUSG00000033446	8.54555	7.55334	7.45389	7.72116	5.77564	5.89539	3.67589	3.31321	3.06568
ENSMUSG00000031913	33.0001	26.7838	27.8984	28.4273	25.799	25.6051	14.9665	12.9773	14.8632
ENSMUSG00000046027	1.77709	1.84988	1.51056	1.25221	1.33785	1.07274	3.94359	3.55301	2.82151
ENSMUSG00000058755	0.368172	0.347503	0.364791	0.524105	0.629516	0.48494	0.022813	0	0
ENSMUSG00000019768	0.553663	0.358643	0.480892	1.03386	0.849059	0.713265	1.50992	1.42698	1.32415
ENSMUSG00000087516	1.46255	2.03643	1.99408	1.79669	1.48775	2.63056	5.12159	4.62315	6.6161
ENSMUSG00000003346	23.2556	19.4323	21.6178	23.605	23.2155	25.6215	11.5709	11.5205	9.23713
ENSMUSG00000021670	15.6586	17.7722	18.5911	10.6868	12.2651	12.9319	8.75433	8.76608	7.6811
ENSMUSG00000042195	7.6153	5.76934	6.66006	7.95421	6.71921	7.5686	14.9214	14.3385	13.1719
ENSMUSG00000030492	0.419338	0.249322	0.416368	0.267344	0.176535	0.0695606	0	0	0
ENSMUSG00000025196	5.57712	5.01839	5.60851	2.88266	3.16255	3.30549	1.97064	2.26919	1.87589
ENSMUSG00000004221	9.4931	6.13261	9.18629	12.4748	8.07563	13.4066	4.69613	4.33064	3.76176
ENSMUSG00000033004	0.952522	1.7683	1.80082	1.39238	1.64448	2.1187	2.67398	5.30472	5.25091
ENSMUSG00000033083	0.830364	0.941976	0.769318	0.778916	0.713681	0.835016	1.8975	2.03162	1.98734
ENSMUSG00000020886	1.36838	1.43997	1.21164	1.32553	1.43671	1.70673	2.34647	3.17401	3.32848
ENSMUSG00000034522	3.52971	3.45038	3.30874	3.31303	4.29995	4.13996	6.28749	8.27945	8.08665
ENSMUSG00000050201	3.70836	4.49336	4.38352	3.23623	3.33221	3.23021	6.93776	8.13935	9.74527
ENSMUSG00000030882	0.336411	0.543571	0.535399	0.329887	0.518883	0.386103	0.913882	1.46595	1.3998
ENSMUSG00000048455	2.80736	2.40088	1.71717	1.42052	1.04765	1.20506	0.119398	0	0
ENSMUSG00000049493	7.194	8.00855	7.88671	8.30777	8.18284	8.22957	3.84495	3.80464	4.08975
ENSMUSG00000038859	30.3887	34.8676	32.5596	32.777	32.6524	31.239	54.1073	52.6762	76.732
ENSMUSG00000020788	0.0100057	0.0276973	0	0	0.0499648	0	0.563047	0.839991	0.892979
ENSMUSG00000000127	2.70217	2.92946	2.90017	3.32541	2.98369	3.3647	6.23114	5.52111	6.59438
ENSMUSG00000074030	8.79876	10.5567	10.7785	8.03616	9.09756	8.72578	3.97618	5.3551	3.98589
ENSMUSG00000020706	41.4106	41.5948	42.2896	34.7044	32.8222	32.9766	22.3219	21.4837	21.1265
ENSMUSG00000031304	4.63061	3.83712	4.05794	5.37856	5.33587	4.71453	0.838871	0.924543	1.98272
ENSMUSG00000090610	8.73547	5.81843	5.33346	3.53965	3.82846	3.11404	0.968139	1.78317	1.07632
ENSMUSG00000040659	34.6541	37.3212	38.0027	43.9581	50.9933	50.9737	21.5751	24.7266	25.1116
ENSMUSG00000029594	15.1494	18.0454	18.9505	10.3361	12.162	12.699	6.41707	8.31144	8.84938
ENSMUSG00000048865	0.167576	0.190712	0.13218	0.159121	0.15238	0.209197	0.00603313	0.0141867	0.0104942
ENSMUSG00000007682	0.085203	0.182405	0.192836	0.03147	0.01897	0.016005	0	0	0
ENSMUSG00000035062	2.38355	1.95589	2.4003	2.21834	2.35489	1.99826	0.203772	0.0187126	0.33734
ENSMUSG00000115902	0.636296	0.544097	0.541609	0.468938	0.363709	0.432976	0.069133	0.01588	0.023433
ENSMUSG00000020423	26.0809	27.7093	31.0849	37.3516	36.1609	38.5792	18.9031	19.4508	15.5443
ENSMUSG00000037148	0.896836	1.12515	0.788053	1.17436	1.31603	1.16476	0.185503	0.244215	0.150837
ENSMUSG00000024382	19.7538	23.4213	20.4029	18.1689	19.651	17.6541	9.18583	10.6107	10.4173
ENSMUSG00000022014	0.451323	0.560907	0.189944	0.121524	0.259532	0.157576	0	0	0
ENSMUSG00000042903	3.07823	2.6895	3.25398	3.6719	4.32354	3.95529	7.21412	8.07622	6.27414
ENSMUSG00000001281	1.17776	1.2223	1.14615	0.766078	0.964813	0.719702	2.85743	3.3186	2.66946
ENSMUSG00000041438	52.1344	48.657	50.297	39.7423	35.128	35.1617	25.2779	25.7048	26.9232
ENSMUSG00000032060	28.0875	20.0595	28.1397	19.984	19.8285	17.5288	10.5323	10.0448	11.6536
ENSMUSG00000031683	17.6173	13.8547	13.5074	11.6296	7.82754	8.92323	7.05187	5.50348	4.18675
ENSMUSG00000059142	0.542954	0.383219	0.554205	0.788721	0.901432	0.646916	1.54724	1.88343	1.31496
ENSMUSG00000040550	34.1694	33.8564	33.0891	27.7566	27.6225	25.2193	17.5082	15.6011	17.7262
ENSMUSG00000003354	0.955483	1.24282	2.02047	0.829685	0.816308	0.792809	0.179923	0.112165	0.0611319
ENSMUSG00000042406	53.5013	49.3605	48.0079	96.6017	99.0356	99.0623	161.415	101.373	92.4384
ENSMUSG00000018585	129.341	89.3894	93.9865	112.103	99.873	97.8642	50.4118	42.2769	23.441
ENSMUSG00000039982	8.7125	8.90295	8.50825	5.625	6.21771	7.38676	3.46627	3.60587	4.39914
ENSMUSG00000071042	2.67316	3.72345	2.82973	4.5324	4.8066	5.28236	6.55618	7.25338	7.62479
ENSMUSG00000021276	12.9711	11.2238	12.0644	10.5603	8.12834	7.20018	5.7176	4.8145	4.72022
ENSMUSG00000007721	48.8944	53.0394	43.9942	38.1762	38.3324	34.1227	23.0438	20.0978	25.5788
ENSMUSG00000046295	4.58744	6.27795	5.14183	3.97581	3.95536	4.92525	1.36242	2.01534	1.63864
ENSMUSG00000103183	0.628153	0.640296	0.581107	0.689607	0.6174	0.364283	2.02351	2.35017	1.60502
ENSMUSG00000025533	11.1379	11.4347	12.2172	12.7681	14.4078	14.9172	6.8551	7.10634	6.31689
ENSMUSG00000047180	37.1373	30.7979	33.4119	44.9086	43.8225	43.0047	23.1374	21.519	14.5287
ENSMUSG00000031765	117.706	94.478	93.5884	104.516	93.1297	93.468	55.8716	46.6024	54.3351
ENSMUSG00000020462	6.12115	4.58034	4.47263	5.48446	5.36206	4.46951	2.2165	1.59942	1.34796
ENSMUSG00000034640	9.38792	8.784	9.1086	15.8413	13.8103	12.6215	19.1625	17.9784	18.959
ENSMUSG00000039748	7.14172	7.06045	7.55902	5.17211	5.61512	6.05753	3.47226	3.67165	3.02932
ENSMUSG00000006517	6.01093	5.76558	5.71602	2.26444	3.22316	3.44092	1.43511	1.66053	1.87494
ENSMUSG00000041415	5.15392	7.43296	6.92879	5.0974	5.47024	6.09218	2.29089	3.07106	3.32587
ENSMUSG00000025407	3.2972	3.70513	4.45602	2.40521	3.0227	2.76459	5.40733	6.8319	7.50875
ENSMUSG00000026090	0.378553	0.308512	0.219228	0.229844	0.157883	0.260044	0	0.0167618	0.00878823
ENSMUSG00000032578	2.17505	1.87023	2.14968	3.23026	3.12395	3.28696	1.35679	1.25535	0.980676
ENSMUSG00000017314	2.65837	3.40863	3.06055	2.73544	2.60198	2.98742	5.31585	6.20589	6.33812
ENSMUSG00000050914	0.730101	0.348399	0.763526	0.749844	0.584611	0.385453	3.21547	3.0603	2.69573
ENSMUSG00000023072	3.2117	3.03435	2.94463	3.11389	3.13788	2.85023	1.19621	1.23675	1.3695
ENSMUSG00000019832	12.2823	10.9849	9.94811	10.9569	9.09123	9.92518	5.45245	4.17762	4.73878
ENSMUSG00000057101	9.11795	8.28774	2.82365	2.25187	2.33719	2.16916	2.11907	2.18172	2.06642
ENSMUSG00000039976	0.541455	0.828228	0.545738	1.05891	0.841163	1.04248	1.33397	3.16954	2.74252
ENSMUSG00000028889	23.9796	18.8616	18.5354	26.7899	23.3527	20.4742	58.6125	44.7564	34.2442
ENSMUSG00000024421	0.437523	0.614636	0.244985	1.20295	1.12641	1.48837	1.31929	1.56369	2.23139
ENSMUSG00000027087	9.05916	14.175	14.5011	12.4676	17.6513	18.962	27.5001	32.4793	28.4776
ENSMUSG00000031562	8.97745	9.40435	8.78957	8.64303	7.84497	8.60525	4.2752	4.05404	4.55636
ENSMUSG00000021127	84.8318	82.9977	83.5084	90.1655	82.3659	81.1039	42.9188	34.2485	50.8823
ENSMUSG00000001670	3.13406	3.1039	2.71734	1.52601	0.995306	0.5816	0.688057	0.1875	0.307283
ENSMUSG00000090935	16.5963	14.0096	14.5618	15.8251	15.3665	14.4026	8.32899	7.93093	5.0842
ENSMUSG00000009350	0.163816	0.378576	0.335538	0.0583409	0.0654482	0.246483	0	0	0
ENSMUSG00000052396	19.7673	22.4205	24.2141	29.9668	30.4377	31.1797	45.9368	45.766	41.179
ENSMUSG00000115326	2.64168	3.20667	1.93358	1.2373	1.11094	0.841131	0.554284	0.584925	0.366133
ENSMUSG00000027999	3.45221	3.18835	2.7626	2.15869	2.17072	1.78096	5.20414	5.5578	5.1693
ENSMUSG00000029715	28.0976	25.1025	22.5755	20.5505	23.2806	21.0062	12.0923	11.1815	8.14208
ENSMUSG00000071656	0.203011	0.284649	0.120717	0.433017	0.361939	0.390174	1.30777	1.23618	1.72288
ENSMUSG00000028007	5.68696	4.46553	4.92057	3.44607	3.26932	3.56112	2.21617	2.20544	2.192
ENSMUSG00000078664	3.63415	2.71399	1.61277	2.26766	4.26917	2.52804	0.509747	0.431669	0.834207
ENSMUSG00000070461	2.80149	3.20508	3.40875	2.28376	2.15967	2.15062	5.65702	5.48295	5.58628
ENSMUSG00000022564	49.2264	56.6573	45.3538	55.0392	60.4553	58.5535	88.5951	91.3939	103.426
ENSMUSG00000039628	0.291819	0.288242	0.165169	0.181637	0	0.137072	2.18287	2.27409	1.89494
ENSMUSG00000045658	4.55047	3.81616	3.96223	3.36922	4.05768	3.34015	7.36114	7.0613	7.01543
ENSMUSG00000031877	9.91446	8.87724	7.83754	12.6746	12.2542	12.6406	6.11851	5.38381	5.65819
ENSMUSG00000027684	9.46558	11.3494	9.96501	10.9517	11.9566	12.8904	5.69212	6.69977	5.9362
ENSMUSG00000083899	38.1677	28.6476	32.5593	34.9751	24.1724	22.7045	16.5306	11.2339	12.4875
ENSMUSG00000030659	3.88107	3.55644	4.38339	5.42821	4.90474	4.9307	8.53097	9.00426	11.5521
ENSMUSG00000036748	29.2406	20.7726	23.4861	28.4518	26.6274	26.5817	13.9244	13.0023	10.9772
ENSMUSG00000016498	8.37349	7.3023	8.21799	16.6109	11.4005	10.0095	4.64172	4.29783	5.16204
ENSMUSG00000002343	7.05073	6.26627	5.56707	4.15333	3.7406	4.06246	2.35121	2.72312	1.84493
ENSMUSG00000023473	0.205603	0.293311	0.185797	0.154465	0.217463	0.214307	0.0249578	0.0375926	0.0288942
ENSMUSG00000039055	6.55556	5.7073	7.09018	6.19211	5.02337	5.51142	2.19212	2.79495	2.50493
ENSMUSG00000028713	6.50924	5.5054	7.06319	5.26755	5.12351	4.82254	2.02694	2.43633	1.22644
ENSMUSG00000024750	10.8585	8.00109	5.37484	5.70614	5.02112	6.19219	15.697	14.5067	11.8313
ENSMUSG00000032741	21.53	26.3911	25.0914	20.8988	24.0029	24.3511	9.81782	11.5374	14.4082
ENSMUSG00000033933	17.5655	15.6411	16.7408	10.1005	17.2455	15.5172	35.8495	36.1349	24.9035
ENSMUSG00000024727	2.79005	2.72421	3.57534	3.59981	3.86268	4.02787	1.29126	1.49055	1.90672
ENSMUSG00000025900	2.29253	2.33888	2.5928	3.63766	3.89014	4.17873	4.82365	5.36513	4.81774
ENSMUSG00000072812	3.60365	4.313	4.82519	8.09131	8.9055	9.66299	3.87232	4.93623	5.97768
ENSMUSG00000035530	141.299	88.0086	99.8164	156.263	126.739	119.959	412.529	289.119	190.202
ENSMUSG00000036854	6.06516	6.573	5.21987	6.28897	5.17569	5.77569	11.4088	10.39	17.7444
ENSMUSG00000026077	0.0540207	0	0.0507595	0.127237	0.224285	0.0381894	0.748819	0.689205	1.4873
ENSMUSG00000107008	0.133354	0.24679	0.274614	0.254121	0.278248	0.151641	0.00719881	0.0135649	0.00910741
ENSMUSG00000032816	1.89921	2.66264	2.31164	2.47701	3.27574	3.57448	4.45192	5.42988	6.58496
ENSMUSG00000052563	5.93992	5.54213	4.86864	7.52824	7.663	7.29812	3.60981	2.97597	2.74286
ENSMUSG00000105402	0.919362	1.09501	0.543779	0.757801	1.08732	0.993215	3.31026	3.59519	2.25515
ENSMUSG00000024413	4.73141	4.01369	3.40288	4.94592	4.83291	5.21556	7.41731	8.00472	9.00407
ENSMUSG00000068739	42.5927	41.203	43.5869	54.3327	49.2089	51.8859	85.047	86.1988	76.512
ENSMUSG00000019960	57.7175	60.5618	60.9219	60.8202	59.9756	64.462	31.2882	35.267	34.5589
ENSMUSG00000027488	2.79101	2.80475	3.2752	2.64917	3.6574	2.6682	7.59684	8.18455	5.36293
ENSMUSG00000029596	6.0506	5.74749	6.27294	5.06469	4.75063	4.45352	1.99029	1.94127	1.56899
ENSMUSG00000022139	2.10473	2.91063	2.70722	2.13808	3.07086	3.01881	4.11452	6.48684	7.1914
ENSMUSG00000033819	3.39437	3.56407	4.20495	3.53896	4.46331	2.99706	1.42303	1.29543	1.5652
ENSMUSG00000020929	20.28	22.6346	21.1366	16.699	18.8225	18.2461	9.36195	11.8493	11.5847
ENSMUSG00000017057	6.86163	5.72658	7.48	5.88976	6.28003	5.66143	11.3171	12.8497	11.8466
ENSMUSG00000029086	0.318769	0.249929	0.415802	0.236138	0.166122	0.232872	0.0143967	0.0296397	0
ENSMUSG00000029394	53.5039	68.1533	46.1767	32.4681	30.5063	32.0994	22.0359	23.3534	32.449
ENSMUSG00000024338	2.27429	1.93924	2.49853	2.63513	2.88193	2.73295	0.983338	0.776273	0.747182
ENSMUSG00000020620	7.44443	8.52342	9.19534	9.51883	10.5377	10.4443	4.34451	5.56732	4.95663
ENSMUSG00000042444	4.63177	5.16918	5.19836	5.84043	6.71949	6.12268	8.75345	9.92621	10.4829
ENSMUSG00000034610	2.99631	4.07836	3.58572	3.8284	4.93458	4.91301	6.1944	8.48802	9.94979
ENSMUSG00000049516	8.11202	8.08092	8.08816	11.4343	10.4221	10.7033	15.0123	17.0023	14.7559
ENSMUSG00000053641	0.480349	0.617767	0.71405	0.431099	0.594179	0.638324	1.08741	1.43545	1.681
ENSMUSG00000118219	0	0	0	0	0	0	0.186556	0.215503	0.009164
ENSMUSG00000006494	8.19582	8.48722	8.97144	7.4957	7.36337	8.16089	14.4149	15.8459	12.4663
ENSMUSG00000034792	2.86229	3.00921	2.74879	3.65321	2.76676	3.21955	1.10871	0.593697	0.786121
ENSMUSG00000034765	5.46997	5.10272	4.96038	9.3872	9.83955	10.3439	9.95787	11.186	12.3796
ENSMUSG00000000386	0.451172	0.993424	0.426159	1.0642	1.13247	0.786603	0.147981	0.12353	0.11308
ENSMUSG00000062590	1.15365	1.09351	1.01836	0.755129	1.01582	0.724833	0.320058	0.418254	0.2079
ENSMUSG00000042660	26.3025	24.4281	24.395	21.9018	19.1624	19.5047	12.6286	12.4942	10.6761
ENSMUSG00000039519	2.80838	2.08252	1.86771	2.24025	1.90181	1.85775	0.612629	0.176729	0.347583
ENSMUSG00000027699	20.661	25.513	27.2	25.5973	23.6323	23.9051	12.7163	14.42	12.5515
ENSMUSG00000052566	10.6259	12.3943	11.9463	13.1311	15.049	15.4366	6.38327	7.58021	6.89922
ENSMUSG00000021252	9.49374	8.7737	8.23322	6.63573	6.32937	6.19893	4.04099	4.0701	4.39157
ENSMUSG00000025323	4.38298	4.58022	5.05018	1.28859	3.65814	3.71373	0.42688	1.17952	1.17058
ENSMUSG00000024410	3.70068	3.52021	3.61943	3.63929	4.0554	3.31782	6.82431	7.43131	6.32663
ENSMUSG00000025577	5.03928	5.45805	5.44266	4.91974	5.63935	5.74667	9.48625	9.25546	12.295
ENSMUSG00000080193	13.1279	9.2332	9.1043	13.2532	9.60491	8.97403	56.0881	39.1999	21.219
ENSMUSG00000027599	15.1104	12.9375	15.2945	12.3266	12.3287	11.9356	7.64284	7.09533	5.45451
ENSMUSG00000035934	0.152082	0.271521	0.220117	0.338014	0.280897	0.305443	0.73789	0.799173	0.800208
ENSMUSG00000058318	3.14474	3.19566	3.23144	3.10019	3.70556	3.42013	5.22925	6.06357	7.76886
ENSMUSG00000054034	21.2314	17.4234	19.1893	18.5398	13.0085	13.478	34.6412	29.3821	35.3528
ENSMUSG00000036078	39.9757	46.5016	37.1718	35.6903	35.1579	32.7123	18.4355	16.2038	24.3982
ENSMUSG00000021039	13.8781	11.7443	13.8378	13.0549	11.6618	12.029	7.61421	6.65724	6.18577
ENSMUSG00000030729	3.44422	3.60411	3.54387	4.61086	5.12621	4.7685	2.24386	2.34653	2.41566
ENSMUSG00000027808	48.7308	39.3784	43.3045	45.9339	43.7589	38.2627	99.4851	86.4964	64.1168
ENSMUSG00000030909	0.853738	0.500656	0.566079	0.292299	0.149073	0.181002	0.039262	0.065435	0.011558
ENSMUSG00000050714	2.68909	2.92143	2.86517	2.96276	3.58781	3.18052	1.50971	1.61611	1.3609
ENSMUSG00000089669	3.06748	3.6035	2.90272	1.87926	2.41845	1.59624	0.827066	0.558257	0.532863
ENSMUSG00000026688	46.0779	39.9983	37.2512	40.32	35.0434	39.1088	20.3793	21.8493	18.4464
ENSMUSG00000032042	46.5217	42.8543	41.498	52.0046	47.7033	45.4952	80.4647	82.266	73.6064
ENSMUSG00000044042	0.83663	0.891776	0.939339	0.851714	0.487178	1.03167	0.227321	0.345336	0.203746
ENSMUSG00000021876	57.4647	47.0575	45.9417	62.7005	51.5849	54.647	112.354	83.2368	92.4213
ENSMUSG00000019916	30.3967	24.8238	26.6471	36.3258	33.7108	32.9962	58.8321	53.8112	46.0634
ENSMUSG00000041957	2.88355	2.87321	2.38004	2.706	2.83563	2.76878	5.73911	5.29358	5.08065
ENSMUSG00000031789	0.585481	0.52857	0.502946	0.897652	0.809191	1.01758	1.57291	1.28613	1.90756
ENSMUSG00000116597	0.118098	0.189297	0.151481	0.198889	0.142328	0.226483	0.00954174	0	0
ENSMUSG00000020523	19.0846	16.8425	15.8465	21.3504	20.8892	20.4053	35.5882	33.1965	29.6791
ENSMUSG00000094885	0	0	0	0	0	0	0.91926	0	0.813115
ENSMUSG00000030287	1.10709	1.44061	1.69019	1.1555	1.44283	1.91836	2.4127	3.96761	3.68223
ENSMUSG00000030257	0.00528782	0.0309385	0	0.00792992	0.0182133	0.00944717	0.205939	0.169985	0.40185
ENSMUSG00000021775	7.67015	7.80103	7.74072	13.4291	13.0967	13.1953	15.2705	15.7247	13.0092
ENSMUSG00000044676	1.80908	1.75332	1.70121	1.81209	1.76369	2.24136	0.631086	0.716092	0.772924
ENSMUSG00000020116	52.7934	47.779	47.644	39.4653	33.3542	30.5675	26.8997	22.1708	23.1974
ENSMUSG00000044149	4.90319	4.7741	4.75082	3.52542	3.1339	3.27166	1.9628	2.00645	1.84337
ENSMUSG00000039835	4.49357	7.51048	7.2627	6.30559	8.02982	8.5567	1.42205	2.6684	3.50631
ENSMUSG00000015837	148.627	150.22	152.618	194.988	200.793	190.962	329.081	330.616	307.885
ENSMUSG00000026826	1.32817	1.38396	1.71626	2.89774	2.67415	2.58184	0.828812	0.991508	0.591027
ENSMUSG00000041084	36.4931	29.8368	27.8871	31.5282	26.2224	26.989	62.6864	48.7011	49.8657
ENSMUSG00000020088	14.3284	14.8333	11.8374	13.5782	16.1288	37.5922	52.1629	49.2051	32.9603
ENSMUSG00000021767	0.812912	1.01258	1.1511	1.06901	1.47004	1.42994	1.70337	2.61524	3.29388
ENSMUSG00000015291	20.2187	13.7367	18.6212	23.0952	20.5808	21.8707	35.45	31.1306	37.5212
ENSMUSG00000111960	1.46238	0.443476	5.10635	0.11413	0.671472	0	0	0	0
ENSMUSG00000027784	1.10901	1.23485	1.27546	1.14923	1.505	1.46321	2.29095	2.84061	2.62383
ENSMUSG00000020424	4.84396	6.3292	4.21138	5.31815	5.06607	8.38561	1.75096	1.98755	1.60881
ENSMUSG00000033949	0.388501	0.405215	0.328772	0.54247	0.471459	0.358153	0.0210141	0.0482523	0
ENSMUSG00000050549	3.54584	2.99787	3.36105	2.95533	3.53313	2.49464	7.70664	7.24128	7.00883
ENSMUSG00000024462	3.44145	3.71911	2.97994	4.19767	4.78364	3.99099	5.66542	7.47764	9.3306
ENSMUSG00000040195	7.20678	6.84495	7.38841	10.0291	9.87028	9.68601	12.8475	14.39	13.1952
ENSMUSG00000008167	9.28108	8.20261	9.35465	7.31711	8.28057	8.87871	3.94473	4.79719	3.57372
ENSMUSG00000001123	126.83	99.2488	103.624	88.9315	69.6364	70.5229	58.7812	48.932	52.4355
ENSMUSG00000002578	1.32836	1.27558	0.979627	0.761522	1.10777	0.666453	0.269709	0.243145	0.367979
ENSMUSG00000031665	12.654	17.8665	15.5827	17.6825	20.1561	20.9895	25.091	32.164	42.1563
ENSMUSG00000019823	0.252925	0.394531	0.167884	0.296123	0.493433	0.317028	0.0247175	0.0436204	0.00745425
ENSMUSG00000026207	0.193156	0.143948	0.138522	0.205806	0.273052	0.319737	0.466629	0.65971	0.751481
ENSMUSG00000042759	47.3885	53.6326	53.9004	47.7256	52.0222	65.862	21.1203	27.4096	31.7433
ENSMUSG00000029177	9.92164	9.66967	9.23349	8.44462	9.27965	8.68448	5.47376	4.27335	4.74359
ENSMUSG00000052139	5.52557	4.74696	4.65763	5.25259	5.00877	4.83679	9.18581	8.15234	11.4876
ENSMUSG00000035274	0.0137523	0.304642	0.174711	0.190004	0.313854	0.230679	0	0	0
ENSMUSG00000025950	56.5486	44.316	46.9973	38.7476	32.3536	37.6	27.5779	24.0642	18.8675
ENSMUSG00000046056	8.9113	8.39882	8.4871	4.75423	6.39876	6.17137	12.3464	11.5603	12.844
ENSMUSG00000117748	1.83379	2.61945	1.78559	1.76542	0.583333	1.48213	3.14615	45.6014	2.86526
ENSMUSG00000024892	3.34679	3.56638	3.55756	2.52312	2.82856	3.37185	1.0584	1.35517	1.55791
ENSMUSG00000025899	4.06823	3.86581	4.20981	4.32769	4.21079	3.92757	2.04942	2.34272	1.94179
ENSMUSG00000007950	12.0428	11.5415	12.0247	11.1003	11.9129	11.8274	6.76169	6.37686	5.57815
ENSMUSG00000027338	1.31476	0.0279846	0.81272	0.238365	0.0458487	0.00275545	0	0	0
ENSMUSG00000001419	8.80349	8.83778	10.0702	10.7649	12.183	13.7877	16.3277	17.3672	28.0825
ENSMUSG00000034156	1.4585	1.09943	1.644	1.25625	2.18657	2.32891	0.578421	0.72281	0.536752
ENSMUSG00000021116	56.4598	45.238	47.0698	51.0174	43.0646	40.2337	28.2834	24.8964	20.0902
ENSMUSG00000085183	8.75992	9.7685	6.93014	13.1677	9.73363	8.95123	32.5793	22.5507	17.8034
ENSMUSG00000035049	15.0095	19.1324	19.6099	10.7742	14.0238	14.5516	6.27888	8.92283	8.83438
ENSMUSG00000026385	67.9131	45.8775	53.8536	44.3172	33.7764	30.4468	28.1283	20.2351	14.6833
ENSMUSG00000030704	23.3032	22.22	20.1434	25.2284	23.9065	22.0384	39.0226	36.7953	39.0973
ENSMUSG00000033676	0.517097	0.628438	0.53965	0.376078	0.569439	0.568907	1.11146	1.6207	1.90617
ENSMUSG00000022629	7.65404	8.6185	8.38325	9.39193	11.7595	11.9437	13.395	18.1623	18.674
ENSMUSG00000095115	53.6122	61.4246	62.6607	70.121	74.3321	73.3522	34.453	39.2624	33.2741
ENSMUSG00000022204	21.3687	17.5264	16.8048	14.4284	13.7502	12.8206	8.47423	8.92594	7.15676
ENSMUSG00000022332	8.4529	6.92736	6.43524	6.03958	5.30612	5.82289	12.2747	11.1286	11.9074
ENSMUSG00000020604	2.12678	1.87635	1.80548	1.74021	1.58107	1.6689	4.12125	3.77832	4.18089
ENSMUSG00000032496	1.04582	0.838673	1.27253	0.748832	0.755777	0.55734	0.198913	0.108739	0.0388294
ENSMUSG00000026672	25.8377	25.5639	25.5555	31.4206	32.0054	32.7939	45.5608	43.5419	49.2751
ENSMUSG00000051335	0.96376	1.37484	1.41189	2.17649	2.3603	2.24236	2.55264	4.03017	3.15958
ENSMUSG00000017446	1.22547	1.24613	1.15384	1.66249	2.57596	2.52532	0.347094	0.615314	0.631983
ENSMUSG00000020325	4.28599	4.54359	5.09816	5.67744	7.13664	6.23832	9.34399	9.67821	13.3651
ENSMUSG00000030605	28.5291	28.756	32.4524	43.6126	48.1032	47.7871	52.1107	58.2893	59.4885
ENSMUSG00000073399	0.813523	0.526371	0.463323	0.906873	0.801047	0.513295	0.0684529	0	0.0174074
ENSMUSG00000058976	0.847168	0.823198	0.787213	0.454041	0.534355	0.815222	0.0421852	0	0.0735055
ENSMUSG00000031626	6.81148	8.61915	8.17755	6.32393	7.06777	6.93793	3.15215	3.43973	4.76766
ENSMUSG00000097187	8.38513	5.08688	7.38181	7.27861	6.61011	7.9632	1.08397	2.46388	0.903366
ENSMUSG00000096727	1.01129	1.12241	1.10255	0.960971	1.21656	1.18198	0.354452	0.217833	0.19454
ENSMUSG00000016319	186.646	149.871	167.441	160.352	152.485	146.648	94.1893	86.497	55.4518
ENSMUSG00000058022	6.69237	5.77397	5.42217	6.82859	5.75123	5.95483	11.2142	11.5315	11.8521
ENSMUSG00000089774	0.970066	1.26751	1.25496	0.805251	0.80873	1.28613	0.395648	0.422426	0.251894
ENSMUSG00000026471	1.14467	1.32986	1.20495	1.55484	1.3318	1.2307	2.79014	2.45827	3.58721
ENSMUSG00000040891	15.3971	16.1128	16.5667	16.9494	15.7647	19.0786	7.33748	8.35124	9.68951
ENSMUSG00000020246	2.85025	2.6399	2.90967	4.13709	3.21304	3.73213	6.03203	5.62065	6.05676
ENSMUSG00000021270	463.303	393.235	409.918	412.756	372.329	372.444	209.011	164.74	165.452
ENSMUSG00000048764	1.02071	0.93388	1.01623	1.80787	1.96781	2.14229	2.09438	2.87066	2.53899
ENSMUSG00000026315	8.18322	8.20552	7.59417	10.0189	9.77354	10.5156	5.00554	4.93725	5.29529
ENSMUSG00000037106	0.315891	0.319993	0.407539	0.580412	0.909626	0.89396	0.884817	1.46929	1.49156
ENSMUSG00000044864	17.0615	25.5685	24.1461	20.0777	27.7455	24.6962	8.08209	12.6546	11.8308
ENSMUSG00000026640	0.327426	0.505232	0.551358	0.565945	0.626952	0.753897	0.930709	1.32284	1.66595
ENSMUSG00000025885	4.96919	6.92951	7.0802	5.29743	6.69584	6.83482	2.30167	3.2133	3.36807
ENSMUSG00000117042	0.404191	0.357737	0.688483	0.43391	0.468944	0.465265	1.25214	1.43212	1.71661
ENSMUSG00000031453	5.16807	12.0508	7.05022	13.12	14.5056	14.578	18.7922	21.5841	22.9963
ENSMUSG00000036867	6.7519	6.20094	6.09688	4.24629	5.22886	5.09225	2.36892	2.83364	2.75212
ENSMUSG00000075419	9.05507	8.76626	9.5235	8.29589	8.21971	8.22879	4.60331	3.75754	3.6329
ENSMUSG00000029101	1.77894	2.03098	2.67651	2.55605	3.07719	2.58189	1.12249	1.2656	0.975791
ENSMUSG00000051497	0.246615	0.210078	0.278553	0.0264655	0.0456278	0	0	0	0
ENSMUSG00000025582	2.06286	2.22741	2.267	0.951307	0.598413	0.99484	0.567076	0.944945	0.678823
ENSMUSG00000038545	1.55026	1.84479	2.16062	1.53858	2.04716	1.83523	0.520905	0.769398	0.787695
ENSMUSG00000042747	21.6343	17.5008	14.8491	19.6809	18.1273	17.7591	40.5109	31.8507	32.2189
ENSMUSG00000027709	2.44054	2.66754	2.74683	1.93927	1.8444	2.25029	1.26842	1.25477	1.10541
ENSMUSG00000026958	6.43853	6.34587	5.87333	7.2926	6.84325	5.6162	3.05984	3.29123	2.86243
ENSMUSG00000038774	6.40746	8.12753	8.13346	8.83737	9.63635	9.39089	12.1985	15.8052	15.8862
ENSMUSG00000030691	2.09022	2.19545	2.19468	2.05672	2.27379	2.17433	0.981871	1.12877	1.25449
ENSMUSG00000067212	5.95746	6.53259	6.20523	8.56593	9.36854	9.26283	13.8611	14.7727	10.8173
ENSMUSG00000046881	0.157239	0.339617	0.189637	0.154845	0.122445	0.286895	0.0117189	0.0288484	0.00509618
ENSMUSG00000020514	44.4516	43.0642	42.8913	30.7184	31.9938	25.6433	23.1331	16.1336	20.4714
ENSMUSG00000029763	6.7403	7.33014	7.77854	7.17412	8.03434	8.00892	3.75152	4.52052	4.39337
ENSMUSG00000007987	5.76898	5.42322	4.77669	5.74114	6.7053	5.95248	2.86989	2.85318	2.66295
ENSMUSG00000031513	22.7991	16.551	16.8446	22.7568	20.3884	20.1317	41.7288	34.4535	32.2044
ENSMUSG00000046441	9.88732	8.57715	8.41725	8.58631	8.23242	10.1234	4.50602	4.9617	4.33092
ENSMUSG00000002625	2.30298	2.29677	2.79867	2.35014	2.96277	2.33995	4.70716	4.84266	5.5249
ENSMUSG00000035547	25.7983	31.0923	29.3177	35.8785	40.591	42.3189	47.5334	57.3196	71.1061
ENSMUSG00000004929	7.64349	9.05162	8.31745	6.75931	7.19519	7.73833	3.48728	4.23677	4.50484
ENSMUSG00000041035	6.2581	5.25826	5.27385	5.21269	5.11394	5.34617	2.44752	2.06212	2.15222
ENSMUSG00000027510	10.5442	8.80194	10.2627	4.88721	4.01819	9.31324	18.2048	17.5239	14.8541
ENSMUSG00000029372	113.396	104.48	93.5604	128.303	101.545	106.944	68.958	49.3282	52.9437
ENSMUSG00000028463	0.583026	0.724512	0.736041	0.565989	0.982469	0.724984	0.087961	0.0698506	0.100038
ENSMUSG00000068922	13.9353	14.2342	13.4263	9.32475	9.82057	10.2357	6.09229	7.18858	7.96721
ENSMUSG00000025477	3.32563	3.79314	3.31758	3.18756	3.87267	4.22908	6.31928	6.80276	7.02728
ENSMUSG00000025232	41.0964	38.7177	37.3549	42.2643	42.0005	42.9864	25.8271	20.9925	21.7894
ENSMUSG00000112290	1.92925	1.67201	2.50563	1.63989	0.840113	0.616771	0.060004	0	0
ENSMUSG00000073489	3.12395	2.52276	2.50055	1.83133	1.62752	1.76963	4.19174	4.74597	4.53047
ENSMUSG00000022052	23.9627	19.9276	18.8962	25.1103	22.6235	14.6456	44.2014	36.3512	39.9308
ENSMUSG00000069662	13.8021	12.5072	12.8352	14.0355	15.4475	15.5198	24.1577	22.5523	23.3911
ENSMUSG00000031775	3.83099	4.61919	5.56163	3.32608	6.35033	3.34251	1.50332	1.42989	0.846325
ENSMUSG00000027715	50.9304	45.2032	44.7154	41.9922	36.9083	35.497	26.1492	21.4311	26.0166
ENSMUSG00000098188	12.5425	12.0766	12.6751	15.3098	14.9776	15.8931	22.6154	23.8898	21.2153
ENSMUSG00000037104	10.9405	11.8872	10.7707	15.1845	15.2296	15.95	8.41259	8.5866	7.88343
ENSMUSG00000029370	3.43928	2.96036	2.7381	5.79763	5.45371	4.60825	8.15358	7.01481	5.75249
ENSMUSG00000018377	18.8378	18.7226	18.4507	24.7912	26.6947	24.6595	32.9117	31.0534	40.9177
ENSMUSG00000029385	6.64401	6.10374	6.08497	14.2738	13.463	12.8384	12.2144	11.4943	7.53785
ENSMUSG00000026870	4.69382	4.10395	3.86905	3.44997	3.08785	3.73366	1.56255	1.59586	1.09851
ENSMUSG00000035775	51.1725	44.5245	46.0626	60.185	55.2738	51.7475	30.6451	31.1162	26.6898
ENSMUSG00000027227	21.7257	21.4449	21.0207	11.794	10.6448	11.5634	21.8208	18.2858	19.7315
ENSMUSG00000118391	0.248276	0.194227	0.188712	0.541565	0.460187	0.51681	0.0508129	0.0358673	0.0506191
ENSMUSG00000001247	89.3101	100.328	94.3184	86.313	92.5157	93.2755	45.2587	48.6641	60.1242
ENSMUSG00000024799	0.858916	0.664697	0.923372	0.476898	0.911195	0.98722	0.115437	0.180149	0.178367
ENSMUSG00000024664	17.1985	18.4567	17.4184	18.3834	18.307	19.7323	31.0658	30.1496	29.6784
ENSMUSG00000024026	4.31273	3.68554	4.03554	3.35854	3.22481	3.1238	1.87161	2.29486	1.60298
ENSMUSG00000033545	4.21835	2.70658	3.2146	4.0478	3.08199	4.37317	1.43467	1.74005	1.72981
ENSMUSG00000010830	23.0269	19.9006	18.6477	24.4373	18.0961	15.1767	43.9251	36.6149	35.8871
ENSMUSG00000116657	0.316436	0.304759	0.274527	0.430426	0.585071	0.488486	0.134972	0.114096	0.121215
ENSMUSG00000074006	4.20575	3.78275	4.17586	5.1864	6.82226	5.56146	2.24684	2.12248	1.97567
ENSMUSG00000117656	0.419062	0.763672	0	0.641288	1.4788	0.826991	6.34104	4.83286	8.78682
ENSMUSG00000075304	86.2212	86.9038	83.3631	75.5442	80.8373	79.6514	44.7911	45.7917	52.8549
ENSMUSG00000071369	5.30682	5.61395	5.65038	7.46986	7.31239	7.57637	9.93179	11.1434	10.7841
ENSMUSG00000026970	36.5339	37.088	35.1447	47.2828	45.0846	44.855	63.1886	66.574	71.6035
ENSMUSG00000075271	2.69862	2.46286	1.98106	2.02578	2.15351	1.32809	0.862122	0.580573	0.575601
ENSMUSG00000008036	59.7708	56.3841	53.575	49.9145	42.6253	41.9442	30.0271	31.5503	25.9825
ENSMUSG00000030337	0.781737	0.883652	0.88185	0.780469	1.15006	1.025	1.66725	1.89986	2.48513
ENSMUSG00000042750	25.4737	25.2551	29.1933	14.4044	15.8645	12.0007	13.1231	13.5779	10.8839
ENSMUSG00000033282	1.14027	1.49645	1.39611	1.119	1.15036	1.22235	0.548669	0.574725	0.63103
ENSMUSG00000035370	0.884849	0.514383	0.435657	0.87738	0.894874	1.23847	6.6302	0.452491	9.11359
ENSMUSG00000023411	1.63884	1.38687	2.04781	2.16886	2.13905	2.87139	0.579024	0.450386	1.02071
ENSMUSG00000006418	28.5989	24.9019	25.8523	29.6505	27.1468	28.6229	48.6031	41.6377	45.7809
ENSMUSG00000096929	0.20512	0.15901	0.244373	0.414787	0.416408	0.213297	0.78524	0.969727	0.68011
ENSMUSG00000028158	1.50291	1.09868	0.922791	1.09964	1.08291	0.837767	2.59018	2.56526	2.55861
ENSMUSG00000038371	4.60757	6.64514	5.9393	4.9054	5.68478	6.03602	8.60973	9.81083	13.5169
ENSMUSG00000019851	102.382	83.745	85.8572	126.875	105.849	108.145	66.2037	53.3646	52.9302
ENSMUSG00000032218	34.0558	29.7643	31.9541	33.042	28.0806	28.6471	16.8626	16.9094	16.711
ENSMUSG00000040102	10.3986	11.1801	10.9706	7.20807	8.8002	8.59015	5.24983	6.02948	5.375
ENSMUSG00000037161	0.631243	0.881369	0.895177	0.339369	0.151018	0.299022	0.0250757	0.0411541	0.0654241
ENSMUSG00000031976	14.5467	16.3638	17.3859	10.1622	12.4234	12.7268	7.82404	8.64421	8.70932
ENSMUSG00000045288	6.27268	5.183	4.9074	6.21715	4.73907	6.06022	1.68456	2.32197	2.8814
ENSMUSG00000030557	4.58092	4.72259	4.63028	6.45222	5.98567	6.45223	7.82065	8.36174	9.14765
ENSMUSG00000021133	13.5531	15.617	15.4748	14.5936	17.0576	18.2243	7.96919	9.56061	9.37932
ENSMUSG00000078965	264.265	277.985	239.392	145.543	140.684	157.573	221.98	331.526	386.509
ENSMUSG00000026484	20.8816	17.7871	18.0165	21.982	19.0254	18.3216	33.4693	31.1552	32.9594
ENSMUSG00000018931	6.71474	7.48918	6.25918	7.85528	9.26843	8.14536	11.1134	14.1359	16.0708
ENSMUSG00000029313	3.72671	4.72207	4.45343	4.15783	5.28491	5.18332	6.57085	8.59559	11.82
ENSMUSG00000041120	2.94914	1.76568	3.16794	5.44842	7.33096	5.36238	1.75005	1.9856	2.31866
ENSMUSG00000039474	5.50299	6.29832	6.55271	8.01372	8.02534	9.74052	11.3767	11.5001	16.5785
ENSMUSG00000028961	27.4006	28.103	29.0707	23.5083	25.8421	27.4014	14.7679	16.8087	15.5802
ENSMUSG00000109675	0.359776	0.80076	0.405794	0.183026	0.520451	0.0257671	0	0	0
ENSMUSG00000022244	10.5521	8.90528	8.55458	4.31507	4.11544	5.43779	5.00271	4.64284	3.68766
ENSMUSG00000034848	0.26237	0.193223	0.31321	0.258036	0.151626	0.196126	0.0223168	0	0
ENSMUSG00000036427	43.3205	47.2843	46.2769	36.5771	37.4241	42.7126	71.8836	65.7147	83.3921
ENSMUSG00000031217	19.0705	20.6233	18.9041	16.4556	18.5201	18.1954	8.96351	10.7184	11.3046
ENSMUSG00000055994	0.870692	1.22177	0.907347	1.26601	1.59252	1.39972	0.386145	0.426178	0.402681
ENSMUSG00000050747	3.14683	3.26884	1.93831	5.9679	5.3337	4.20046	1.58841	1.60677	0.896571
ENSMUSG00000026170	3.94743	3.47934	3.09725	4.6395	3.87537	4.49127	8.31228	7.22862	9.3576
ENSMUSG00000026420	6.55133	4.43537	5.48678	7.15343	6.24236	5.51838	1.91329	2.39729	1.725
ENSMUSG00000046245	1.38514	0.868417	0.546706	1.30736	0.985884	1.10962	0.128308	0.149574	0.257848
ENSMUSG00000032226	0.302118	0.252887	0.176982	0.398466	0.518411	0.682411	0.068233	0.059334	0.031442
ENSMUSG00000050910	12.9616	15.071	13.7683	13.4352	15.4412	16.843	23.1593	23.7173	29.094
ENSMUSG00000054087	0.0256	0	0	0	0	0.0681977	0.767595	0.964238	0.654047
ENSMUSG00000035173	8.95606	10.5872	10.0583	11.2868	12.0498	12.3066	15.6622	18.1425	20.6399
ENSMUSG00000002897	2.5515	2.96214	2.89077	2.78344	3.17909	3.36661	4.73415	5.56412	5.62167
ENSMUSG00000096215	5.13117	2.03425	4.15241	3.39426	4.39427	3.13023	0.461957	0	0.0792205
ENSMUSG00000057666	21.6823	24.5201	22.0291	13.5176	13.6265	12.8188	87.481	20.8705	34.7629
ENSMUSG00000079342	0	0	0.08	0.091138	0	0.045439	1.4798	1.51923	0.863038
ENSMUSG00000021254	4.38874	4.58876	5.33788	4.31012	4.42058	4.58983	2.10996	2.83935	2.17762
ENSMUSG00000039879	4.36369	4.11793	4.67529	7.10299	7.32896	7.83083	8.95415	9.02119	7.46786
ENSMUSG00000071176	2.49561	2.72793	2.68997	2.50343	3.04877	3.72905	4.74908	5.54018	5.4527
ENSMUSG00000079018	79.2873	64.5099	71.7481	92.606	80.5316	101.395	137.787	130.169	133.376
ENSMUSG00000003033	32.6996	29.5277	25.6928	25.3801	24.4228	24.3308	15.5347	12.9527	17.0276
ENSMUSG00000026166	5.30083	3.5358	4.80493	1.65234	1.44331	1.32425	1.64682	1.46323	1.67123
ENSMUSG00000001211	9.90332	14.8549	11.1734	9.45795	10.866	13.0966	6.0995	5.72448	6.16021
ENSMUSG00000033319	13.7903	13.3405	13.789	15.5171	15.4493	16.191	24.6556	24.2906	21.96
ENSMUSG00000035873	26.0217	21.1757	24.9779	26.9239	22.7794	25.2654	44.6094	42.8546	40.283
ENSMUSG00000059401	1.11895	1.7885	1.49143	1.14801	1.00054	2.03068	0.313053	0.23616	0.502299
ENSMUSG00000027381	5.83434	8.03707	5.22531	7.61441	7.56606	7.06024	11.7211	17.1117	10.8817
ENSMUSG00000027800	19.65	12.4512	17.5357	15.7792	13.4166	13.1794	8.25444	7.8155	4.67419
ENSMUSG00000025487	29.0334	23.3225	26.8164	24.5866	23.1629	24.2868	15.6072	14.1396	10.0309
ENSMUSG00000000056	5.16477	4.3893	4.71948	6.00529	6.38199	6.3673	9.58339	10.0562	8.42952
ENSMUSG00000044477	16.1277	16.6175	15.5792	18.3442	17.5113	18.9068	26.7044	26.9778	30.4819
ENSMUSG00000046687	50.3478	26.1184	44.7327	52.8121	43.7264	43.382	20.3616	19.2904	21.0449
ENSMUSG00000031347	10.159	7.76289	8.57723	8.88925	7.05107	7.04023	4.17578	3.0081	2.62144
ENSMUSG00000032558	0.239862	0.284231	0.119215	0.218274	0.12095	0.0931814	0.764138	0.857005	0.607956
ENSMUSG00000025283	26.2668	18.5665	21.4298	27.3118	20.9508	20.2961	56.2505	45.6161	32.0277
ENSMUSG00000008373	18.9644	18.0637	17.4061	17.7304	14.4746	14.9537	10.6047	9.46817	9.23401
ENSMUSG00000038587	9.79138	15.124	13.3604	10.6295	12.8952	13.0122	5.26943	6.49982	7.22725
ENSMUSG00000045071	0.386601	0.558903	0.496078	0.366439	0.457502	0.427097	0.802914	1.06352	1.48626
ENSMUSG00000035506	0.777348	0.569956	0.429009	0.261595	0.285272	0.37271	0.0615924	0.086396	0.0149653
ENSMUSG00000061111	21.3879	21.3221	20.3354	24.2713	23.0167	21.3759	35.5827	38.8786	39.5867
ENSMUSG00000089712	0.939992	1.06636	1.1739	1.99681	1.52426	2.17491	0.169523	0.504334	0.331463
ENSMUSG00000025036	1.60583	1.77478	1.95642	1.78334	1.67169	2.02242	0.676391	0.830351	0.414095
ENSMUSG00000020917	55.4507	62.4832	61.935	45.6629	50.8048	52.9147	29.625	33.8194	32.5115
ENSMUSG00000040828	5.49857	4.93823	4.23249	5.51716	4.75449	4.18727	10.3937	9.37393	8.22632
ENSMUSG00000079042	37.5949	17.0442	28.3998	11.3237	8.33502	4.93183	15.432	12.4868	8.00898
ENSMUSG00000040220	13.0115	16.3861	14.3951	12.1376	12.5303	12.072	6.35792	8.00046	7.77117
ENSMUSG00000059810	1.82261	2.00748	1.99038	3.49411	3.34746	2.51051	4.17115	3.69472	4.20119
ENSMUSG00000037813	0.892297	1.31426	0.741502	0.704866	0.676791	0.967568	0.214817	0.245126	0.253714
ENSMUSG00000038213	6.74571	6.6336	6.72181	6.6893	7.19144	9.07977	13.1438	13.4504	12.8852
ENSMUSG00000103081	0.162712	0.038072	16.7363	0.012223	0.041835	0.040967	0.585496	0.061358	0.029131
ENSMUSG00000037447	0.725439	1.25376	1.31212	1.61475	2.58161	2.38363	2.49127	3.16221	2.73305
ENSMUSG00000029379	26.1166	24.1596	20.8519	16.1732	11.9335	12.5221	13.6103	8.46632	12.3198
ENSMUSG00000032115	22.0977	26.3314	26.6104	22.0956	26.8646	28.5106	38.5416	50.9244	44.5447
ENSMUSG00000038126	3.66938	4.45558	4.00412	3.01717	3.47475	3.09689	1.49002	1.9579	2.20179
ENSMUSG00000029167	1.24823	1.72903	1.51193	0.719938	0.632119	0.757648	0.415406	0.577266	0.540193
ENSMUSG00000054702	5.05956	4.5976	5.25441	4.43668	4.99505	4.16169	1.85078	2.2232	0.92934
ENSMUSG00000028268	102.225	90.8641	93.656	112.491	102.373	98.7797	190.93	172.479	162.208
ENSMUSG00000018476	3.43257	4.76091	5.35042	4.40679	5.7984	5.35742	7.01857	10.0116	14.0835
ENSMUSG00000024487	14.5604	11.2227	11.3253	13.4345	11.8264	12.9647	23.8143	21.5956	19.9481
ENSMUSG00000032372	9.89555	6.30862	9.51308	5.48428	4.92791	4.50916	3.96798	4.01213	2.90196
ENSMUSG00000017493	263.338	236.442	233.698	185.251	77.2187	79.007	85.4241	76.9572	100.582
ENSMUSG00000062210	9.08577	6.98493	8.00427	9.95452	9.93829	9.43944	5.82665	4.95435	4.35104
ENSMUSG00000087326	0.473072	0.71199	0.837778	0.525942	0.575603	0.481027	0.016575	0.112846	0.057662
ENSMUSG00000001761	20.9943	22.3504	21.8117	19.864	22.0256	21.5977	12.0922	13.3985	12.8495
ENSMUSG00000079484	1.30626	1.16953	1.25811	2.52582	1.26687	2.52181	5.37734	3.39759	3.94795
ENSMUSG00000025085	8.02016	20.3403	19.4121	20.3412	21.3887	14.3588	8.47478	3.475	4.33108
ENSMUSG00000044080	72.2605	65.9152	57.3569	82.5213	66.124	71.7203	43.6908	32.2947	30.7731
ENSMUSG00000046186	2.34627	2.81542	3.23854	5.1552	5.29813	5.21469	5.09207	5.4135	5.52792
ENSMUSG00000022463	12.1466	17.7616	17.5398	8.79129	10.5842	11.5702	3.29613	6.44912	7.99496
ENSMUSG00000019647	6.47011	4.36739	4.97518	3.34373	3.9808	7.00871	1.09807	2.36078	1.96919
ENSMUSG00000019990	0.0374674	0.0594856	0.0198144	0.0612981	0.0138741	0.0212423	0.154957	0.250509	0.350391
ENSMUSG00000022641	1.31496	1.34496	1.69102	1.55883	1.78836	1.5491	2.33127	3.83135	2.79537
ENSMUSG00000112573	0	0.061228	0.159334	0.313507	0.308455	0.456549	0.855159	2.2736	1.90342
ENSMUSG00000074465	0.630573	1.00961	0.71764	1.07414	1.2281	1.17471	0.027799	0.065514	0.049754
ENSMUSG00000004508	1.0748	1.36105	1.36685	1.09084	1.37898	1.18628	0.297429	0.490567	0.474033
ENSMUSG00000028518	3.57201	4.82518	4.20189	3.28797	3.86402	3.40983	1.6606	2.30206	1.96604
ENSMUSG00000054843	4.21131	2.88425	4.21216	4.80447	5.26345	5.24717	2.28381	2.61321	2.03196
ENSMUSG00000036687	0.659671	0.514816	0.881883	0.866444	0.825766	1.10036	0.249255	0.218132	0.10419
ENSMUSG00000101013	0.245962	0.010656	0.814053	0.271361	0.391138	0.054735	0.003508	0	0
ENSMUSG00000046694	8.9055	7.92972	7.42485	7.71395	9.40841	7.2652	3.4123	4.35538	2.27424
ENSMUSG00000037946	13.9871	15.2398	15.8278	14.5679	15.8815	16.1212	7.71954	9.80584	8.74795
ENSMUSG00000031714	33.1671	36.9751	34.1746	31.6108	35.7191	32.5044	18.3089	18.8609	22.2741
ENSMUSG00000022876	0.430451	0.263304	0.472785	0.293252	0.148827	0.0842704	1.23345	1.02799	0.865177
ENSMUSG00000025993	6.85764	6.01614	5.7923	4.77328	5.28571	5.40807	3.18118	3.51724	2.88507
ENSMUSG00000021115	11.279	9.45177	9.70052	8.09419	8.72287	8.45776	5.31623	5.58652	3.58109
ENSMUSG00000031708	39.9888	37.5125	39.837	38.4894	32.7593	32.053	17.4917	19.7668	24.6244
ENSMUSG00000056050	13.6022	17.9015	19.5755	14.0213	16.927	18.0992	25.6391	30.8643	31.9512
ENSMUSG00000057788	20.1708	19.7926	19.3406	15.3364	14.0118	15.8812	9.73149	11.0324	10.3635
ENSMUSG00000027654	14.1214	13.3562	12.4115	8.74477	9.39509	9.70038	6.75334	6.57252	7.48446
ENSMUSG00000027947	4.18472	4.90651	4.78392	5.26865	6.16904	6.02264	7.32539	8.78765	10.7496
ENSMUSG00000000085	4.07002	3.91824	2.59639	2.72796	4.80528	4.83137	1.70655	1.28726	1.78447
ENSMUSG00000025986	10.7525	11.33	11.6818	6.28947	5.4851	6.68351	9.43645	10.581	9.98741
ENSMUSG00000017652	1.4775	1.50235	1.61578	1.29896	1.72696	1.38723	0.58869	0.31157	0.409724
ENSMUSG00000040339	12.93	13.6264	13.9022	17.2636	18.6763	18.0107	11.2529	5.54742	5.74463
ENSMUSG00000030237	0.527929	0.485709	0.550718	0.850096	0.53874	0.384699	0.160738	0.10122	0.0624453
ENSMUSG00000049659	7.35767	7.62524	7.81887	9.52466	9.55223	9.53486	13.1703	15.5548	12.4294
ENSMUSG00000073838	58.4538	49.2938	48.4004	50.2357	48.7537	47.0395	31.2007	30.2362	21.8682
ENSMUSG00000113780	0.632572	0.390415	0.294103	0.322844	0.142847	0.326447	0.022179	0	0
ENSMUSG00000033039	4.31773	4.28035	3.04548	6.41908	6.68764	7.04839	3.49714	3.31183	3.79193
ENSMUSG00000025558	1.24693	1.41532	1.74072	1.73273	2.24928	2.3904	2.67427	3.39689	3.42635
ENSMUSG00000023723	27.1605	27.6061	25.6456	24.7045	23.8059	24.2506	14.6452	10.907	15.3186
ENSMUSG00000037960	16.8564	17.0508	14.3593	19.6721	17.5235	18.6181	30.5878	25.3361	41.1506
ENSMUSG00000034949	0.181834	0.196992	0.142192	0.200755	0.156388	0.266016	0.670964	0.497075	0.819645
ENSMUSG00000045934	3.98088	4.55213	4.32944	6.00921	6.12945	5.95399	3.10353	2.7281	2.54269
ENSMUSG00000031787	2.36961	2.87834	2.49805	2.17236	2.11365	2.82938	0.878582	1.16481	1.19507
ENSMUSG00000019066	3.056	3.85768	3.83988	4.88995	4.87219	5.29212	7.04754	7.57436	7.2402
ENSMUSG00000051076	10.6536	10.8819	10.6031	13.6709	13.6923	12.6443	6.04648	5.88955	7.80743
ENSMUSG00000035828	20.1762	18.3819	18.923	18.5922	20.0454	19.8591	34.46	33.987	28.5594
ENSMUSG00000047669	0	0	0	0.073014	0	0	0.581032	0.604045	0.25277
ENSMUSG00000101210	0.41785	0.592545	0.714732	0.262769	0.422685	0.433064	0.032731	0.067337	0.057032
ENSMUSG00000053198	0.991876	1.48908	1.4237	0.856028	1.52666	1.21242	2.47982	3.58617	2.96758
ENSMUSG00000028318	7.04053	5.60557	6.01203	4.28926	4.25347	3.70383	3.07356	2.98949	2.56785
ENSMUSG00000022757	23.4214	23.0029	20.2158	21.0199	19.5612	18.4025	33.3721	31.5453	41.9815
ENSMUSG00000039530	16.0895	10.9326	15.1951	17.2892	15.3956	14.1372	8.48225	7.27469	4.47963
ENSMUSG00000053886	23.0086	21.7732	23.5567	19.3875	18.5804	18.2245	13.3332	11.761	8.83176
ENSMUSG00000110140	2.64675	2.33394	1.90442	3.32028	2.90716	2.48219	0.880165	1.1755	0.769469
ENSMUSG00000107881	3.98588	4.4421	3.80836	6.06357	4.90255	4.93763	7.95726	8.17558	8.15954
ENSMUSG00000026875	0.274977	0.307396	0.347303	0.609117	0.633618	0.80887	0.926234	1.20935	0.814756
ENSMUSG00000040570	1.94763	1.64509	1.55928	1.67031	1.79995	1.66309	4.42637	4.07349	2.96462
ENSMUSG00000058070	8.54185	8.46352	9.06684	11.0075	11.01	11.1789	5.94183	6.67728	4.90718
ENSMUSG00000020905	0.11614	0.160819	0.126741	0.111275	0.213056	0.274538	0.0109232	0	0
ENSMUSG00000097636	2.04366	2.56993	1.89316	3.89478	3.76976	3.19017	4.59453	4.54602	4.15708
ENSMUSG00000027534	9.91649	8.42345	9.36721	9.93707	9.68773	10.5317	5.67344	5.04756	4.30503
ENSMUSG00000022636	5.12684	5.00621	4.43643	3.15803	4.52391	4.02433	7.0577	8.06039	7.68958
ENSMUSG00000044224	11.8241	10.2706	10.669	12.1358	10.1607	9.37529	18.9749	16.2293	20.1379
ENSMUSG00000044456	5.98016	7.57664	7.04993	6.49597	7.72586	7.43089	2.79075	3.17286	4.56795
ENSMUSG00000034413	3.09646	3.98584	4.01832	2.80415	2.73285	3.46716	1.0647	0.737576	0.118968
ENSMUSG00000044167	3.33098	3.58027	3.71204	3.45351	3.21866	3.95829	1.87611	1.62902	2.10652
ENSMUSG00000024335	25.3264	27.6601	25.3089	25.9173	25.5943	25.6033	38.6994	42.6478	48.0656
ENSMUSG00000031622	13.2876	12.5921	12.7448	10.5449	9.86547	9.82402	7.16794	7.70256	6.29087
ENSMUSG00000019214	5.05027	5.48518	5.68055	4.27985	4.84117	5.20206	2.19696	2.96113	2.75173
ENSMUSG00000037151	4.94454	5.79745	5.19935	5.7776	7.93301	7.14528	10.0695	10.0856	12.7898
ENSMUSG00000104968	4.21475	2.45139	2.84615	1.21444	1.70886	1.01483	0.298133	0.441478	0.469595
ENSMUSG00000067071	10.8264	9.75231	9.24759	9.26193	10.6507	10.0318	19.6279	19.05	15.7384
ENSMUSG00000025128	0.682838	0.6778	0.705662	0.285399	0.283205	0.288028	0.132622	0.063237	0.0674
ENSMUSG00000094932	0	0	0	0	0	0	0	0.654214	0.839797
ENSMUSG00000002845	5.25074	5.37232	4.8399	5.56823	4.95932	5.10464	9.80577	8.11137	9.53021
ENSMUSG00000010517	13.4177	12.1224	11.1963	14.7138	12.1541	12.6508	25.0181	21.799	18.4097
ENSMUSG00000052485	31.6703	27.7947	28.2341	30.9889	24.2705	28.4683	14.6226	13.0698	17.8955
ENSMUSG00000059173	0.799059	0.737187	0.709024	0.258697	0.287933	0.139275	0.201934	0.0732126	0.168702
ENSMUSG00000040124	6.95774	7.10329	6.49175	7.85054	6.98805	6.26511	12.4301	11.3194	13.6275
ENSMUSG00000041926	20.8925	21.8142	18.5976	17.991	18.0091	18.8043	12.0368	11.8287	11.5317
ENSMUSG00000030259	2.58344	3.91376	3.15366	2.70009	3.2306	3.83133	5.65637	6.56025	6.55881
ENSMUSG00000091337	22.8353	18.6137	20.1302	21.5025	15.8914	16.5601	41.0965	36.7271	28.2903
ENSMUSG00000019718	3.42789	3.69038	4.61047	4.00662	3.49362	4.02924	1.50617	1.71457	1.60211
ENSMUSG00000035227	9.8506	16.6845	8.57488	9.83097	7.78865	9.62558	18.2252	17.9886	27.4403
ENSMUSG00000033047	65.565	65.1554	63.8947	55.8968	54.8343	53.6601	37.9134	33.819	38.5203
ENSMUSG00000021009	9.46315	11.6371	12.1289	10.7892	13.8484	12.6111	5.56525	7.40145	6.60605
ENSMUSG00000054814	9.91377	9.07985	8.99493	10.1696	9.1376	9.26632	5.6992	5.8439	4.40515
ENSMUSG00000020111	3.89714	4.30693	4.09058	4.42042	3.36098	4.60015	6.25552	8.03333	7.75457
ENSMUSG00000068196	13.4533	14.9521	15.7597	19.5868	21.1921	22.321	10.773	12.7696	12.2316
ENSMUSG00000050064	5.80313	7.22706	6.33391	6.37906	6.69026	7.79512	2.93055	4.14471	3.61974
ENSMUSG00000050315	0.0980278	0.335345	0.124786	0.206795	0.314858	0.182081	0.00790611	0.0256531	0
ENSMUSG00000058290	7.16761	9.54563	9.4925	5.1105	6.83481	6.96066	2.99974	4.24943	4.7764
ENSMUSG00000074151	7.24206	9.39594	9.76237	9.47133	11.8182	10.5825	4.2338	6.0508	5.62215
ENSMUSG00000034480	1.02734	1.6137	1.55349	1.75911	1.35353	2.35399	2.71014	3.31627	3.8315
ENSMUSG00000047123	4.00863	5.66713	4.94928	4.32462	5.23062	4.52892	7.78966	8.65164	12.5062
ENSMUSG00000028096	12.3378	10.8572	10.9261	9.99931	9.76271	10.876	5.77477	6.49172	6.28093
ENSMUSG00000116114	3.64553	3.53886	0.985295	5.91874	1.8906	5.04186	15.4059	6.58537	16.9139
ENSMUSG00000003955	29.2032	25.3743	27.806	32.5305	24.801	29.743	64.2097	58.9131	39.2683
ENSMUSG00000019841	1.42138	2.42433	2.54909	2.02808	3.04051	2.42354	3.55674	5.9541	5.18265
ENSMUSG00000070730	7.26374	6.88362	7.12887	6.91213	6.80668	7.77924	13.075	13.5276	10.8757
ENSMUSG00000034731	0.10777	0.30318	0.424079	0.469832	0.571751	0.571256	0.709846	1.19911	1.56481
ENSMUSG00000011114	59.6803	45.9311	48.5314	57.2178	48.5661	46.0264	106.317	81.8893	81.4505
ENSMUSG00000043953	0.344317	0.184364	0.373675	0.239794	0.421382	0.411477	1.41034	1.35957	1.2937
ENSMUSG00000034602	3.57354	3.98108	4.30403	3.44896	4.28445	4.01517	5.98482	6.66312	7.15171
ENSMUSG00000045193	4.48283	4.16511	4.36978	7.16421	6.29809	6.34308	10.8877	11.1531	7.11677
ENSMUSG00000074874	6.43201	4.27222	4.35914	6.05759	4.50004	4.90588	2.30336	1.52086	1.50547
ENSMUSG00000076258	397.196	2157.66	2990.49	393.058	1112.06	431.623	378.485	315.168	187.529
ENSMUSG00000001228	43.3581	56.3068	57.0251	43.2035	60.3484	61.5881	24.154	32.0336	29.5964
ENSMUSG00000041841	141.067	157.286	145.591	142.486	132.885	126.588	244.702	216.409	239.226
ENSMUSG00000050425	4.18242	3.35582	3.32465	5.25016	3.7727	3.3517	1.52661	1.42264	0.729882
ENSMUSG00000021537	20.1181	16.0849	15.7062	13.6563	10.8987	11.8755	9.81693	8.33604	7.04969
ENSMUSG00000020894	6.45502	5.4693	6.66063	6.65387	6.85963	6.41881	11.4939	9.95324	12.4806
ENSMUSG00000039960	10.3335	9.93674	9.45282	18.4063	19.6897	18.2488	15.123	15.4739	11.8697
ENSMUSG00000026153	7.91701	10.3587	12.9781	11.1375	12.2623	10.6095	16.0963	23.4345	19.6247
ENSMUSG00000036513	10.3292	8.93142	9.17372	7.89177	6.35965	5.77463	5.07699	4.39489	3.41295
ENSMUSG00000025860	9.44311	9.35628	9.12263	11.081	12.2735	11.3736	5.94048	7.35633	5.42909
ENSMUSG00000026245	55.4124	46.3497	44.3268	54.2748	45.0887	45.0667	89.1875	73.185	81.6706
ENSMUSG00000089999	15.5588	7.11569	9.72143	19.6861	14.2023	15.6805	48.695	32.8521	24.0347
ENSMUSG00000009585	4.60719	4.67918	4.18481	3.39149	3.737	3.64005	1.79055	2.10426	2.70332
ENSMUSG00000116498	2.94782	1.64991	3.89697	4.54599	4.28646	3.46191	0.652523	0.761009	0.284257
ENSMUSG00000044217	0.44283	0.255129	0.21979	0.533169	0.41363	0.435554	0.0198728	0.0327304	0
ENSMUSG00000024759	20.8623	21.5913	23.817	28.3993	31.9126	31.6616	16.3123	18.8081	13.3925
ENSMUSG00000032329	2.40986	2.45935	2.66013	3.32619	3.08292	3.31524	4.38406	4.57538	5.30955
ENSMUSG00000028480	5.48872	3.68732	5.70902	5.57315	6.00092	4.66194	11.9884	11.3	8.57844
ENSMUSG00000067889	0.737767	1.16053	1.04606	0.702764	1.03587	0.777964	0.277481	0.35129	0.347629
ENSMUSG00000026615	20.5705	25.3809	25.5003	24.0698	27.894	27.4071	38.5394	50.9357	48.1139
ENSMUSG00000042428	11.1669	11.6897	11.8429	11.6231	12.2676	13.3694	18.4869	20.5177	19.2762
ENSMUSG00000046223	23.4918	27.4427	23.7066	43.7578	44.7234	44.5838	40.2338	34.6152	46.6617
ENSMUSG00000026158	0.740099	0.70987	0.608312	0.727486	0.687418	0.654487	1.25335	1.54294	1.82127
ENSMUSG00000044197	0.120628	1.20958	0.776096	1.15116	1.37842	1.44179	3.60811	4.14771	3.65474
ENSMUSG00000018796	18.5833	20.8028	18.1246	25.3946	15.4882	13.8087	9.347	5.79082	10.2337
ENSMUSG00000030588	14.2	14.8436	11.8616	10.1994	11.616	10.3059	23.4635	20.971	19.6056
ENSMUSG00000032849	5.00688	6.20414	5.5299	4.33238	5.61381	5.66114	9.46972	11.1856	8.27833
ENSMUSG00000058922	76.9909	66.8211	62.9323	78.6072	57.4739	66.8834	41.1736	36.8079	36.0956
ENSMUSG00000039157	7.80779	10.35	9.45823	9.17603	11.3809	10.9719	4.68899	5.28036	6.14445
ENSMUSG00000110949	9.37393	9.90258	11.0596	7.85031	7.47962	6.08043	4.21708	3.6269	3.72368
ENSMUSG00000040447	6.76755	6.60504	6.64389	11.7759	15.1961	11.6651	10.7948	10.3089	9.68345
ENSMUSG00000020810	0.022668	0	0.019245	0.144456	0.057614	0.067554	0.423105	0.352532	0.693111
ENSMUSG00000034761	8.09413	7.97654	8.17977	7.94373	8.68672	8.27992	2.97905	5.03157	4.9272
ENSMUSG00000039000	7.6255	7.67621	7.58281	7.38455	8.14	8.01954	4.49701	4.98008	4.19073
ENSMUSG00000013150	6.07776	5.32705	6.72239	5.3932	6.25864	6.1011	3.18805	3.47417	2.26869
ENSMUSG00000031983	21.2714	21.1455	23.5673	25.6251	25.4236	23.9925	36.2367	38.369	36.8332
ENSMUSG00000040213	6.50903	5.30751	5.46067	5.49577	4.09884	3.98139	11.638	8.56272	7.47115
ENSMUSG00000029860	7.03349	7.46791	5.56864	9.10639	10.7991	11.052	12.7671	13.2659	12.2863
ENSMUSG00000049971	5.5521	5.36174	5.42276	5.63587	4.64995	5.25394	9.08361	9.18787	9.05254
ENSMUSG00000036381	0.232621	0.105608	0.393863	1.01035	1.04841	0.92124	0.847495	0.57392	0.66707
ENSMUSG00000021385	6.39931	5.86942	5.75768	5.63322	4.38948	5.25813	3.10841	3.18887	2.1965
ENSMUSG00000022124	3.2986	2.72598	2.74525	4.52763	3.73333	2.92706	7.41954	6.85558	4.90009
ENSMUSG00000001416	69.1729	58.7622	61.6835	61.47	56.6342	58.1434	37.5163	36.0824	26.3787
ENSMUSG00000005883	0.538719	0.781623	0.665293	0.733892	0.642539	0.791092	1.99928	1.89518	1.55921
ENSMUSG00000008136	1.37037	0.860851	1.53011	1.76813	2.15215	2.55526	5.30045	3.73114	3.79655
ENSMUSG00000032009	5.70763	7.45489	7.90663	9.96522	12.8166	12.3072	11.3826	14.7109	14.1322
ENSMUSG00000046733	69.6113	70.7674	69.2578	104.942	102.157	101.105	120.778	112.913	137.208
ENSMUSG00000026502	8.11754	7.03407	7.64052	10.0365	9.91109	10.0512	14.7445	15.8216	11.1966
ENSMUSG00000049134	0.367129	0.531259	0.473056	0.256103	0.724616	0.604887	0.0527405	0.0681047	0.122797
ENSMUSG00000022885	2.1715	2.71701	1.81227	3.31541	3.4678	3.91993	1.44144	1.53931	1.48446
ENSMUSG00000040511	21.2736	21.7033	20.8256	29.471	28.328	29.3083	35.2542	35.8714	40.0338
ENSMUSG00000027075	0.838283	0.703444	0.706428	0.37275	0.577146	0.361795	0.175098	0.193117	0.139896
ENSMUSG00000044068	4.17054	2.82109	3.00403	3.48044	3.65742	2.64557	6.0239	7.52812	5.94335
ENSMUSG00000040693	0.792576	0.924577	0.701735	0.446505	0.325819	0.458141	0	0	0.073476
ENSMUSG00000024660	39.2915	43.9987	39.8118	32.4613	34.8659	35.9887	20.0771	20.5439	27.0135
ENSMUSG00000034108	17.0028	20.0114	16.2627	20.1351	17.1611	19.4976	9.39124	11.4242	8.58906
ENSMUSG00000092216	1.14206	1.47068	1.33675	1.06601	1.2062	1.50856	4.5188	6.32543	2.91111
ENSMUSG00000078485	2.71206	3.22624	3.02511	3.80772	3.73606	4.04741	4.92069	5.58128	6.72902
ENSMUSG00000020439	22.1167	31.343	27.3104	17.4503	18.8509	22.8121	9.35291	12.1017	16.1305
ENSMUSG00000078879	0.154405	0.0255273	0.0408881	1.41995	0.0296517	1.54144	1.38606	4.00228	1.99209
ENSMUSG00000020919	5.87467	7.92198	8.45514	7.22941	9.21942	9.08724	11.8197	16.1855	14.6985
ENSMUSG00000028121	9.01367	10.0436	9.4953	12.0495	13.2634	13.6349	6.16134	7.71203	7.16448
ENSMUSG00000024846	0.374468	0.564256	0.478971	0.452563	0.542661	0.352718	0.0202422	0.061846	0.0993089
ENSMUSG00000020642	3.31108	4.97429	4.43255	6.62563	7.05773	5.92081	3.09366	2.5552	3.66634
ENSMUSG00000049091	54.7412	42.0816	47.5348	32.5176	28.8351	32.289	29.0402	27.4935	20.5733
ENSMUSG00000039886	27.5224	24.1983	25.2417	23.9653	24.6493	22.2682	44.714	41.2679	37.1754
ENSMUSG00000021690	4.63459	4.8619	4.612	5.41354	6.33594	6.60965	7.30069	9.2202	9.46843
ENSMUSG00000048200	1.70077	1.48538	1.22302	1.54841	1.55412	1.14092	0.401156	0.473955	0.348968
ENSMUSG00000049580	6.62699	5.35458	7.05536	8.2083	9.25256	11.1428	10.3766	17.5742	14.2338
ENSMUSG00000041571	46.8199	37.6017	41.9025	52.4238	48.639	49.1976	79.673	73.2098	75.8313
ENSMUSG00000032815	5.10474	6.44331	5.69425	4.611	5.49371	5.14496	2.3842	3.30612	3.16043
ENSMUSG00000020684	0.617188	0.601678	0.239419	0.652655	0.420837	1.23923	0.859927	2.94072	4.85972
ENSMUSG00000024036	0.93712	0.965795	1.1073	1.45007	1.59778	1.75154	1.936	2.16829	2.08955
ENSMUSG00000073198	5.84363	6.70785	6.26766	7.03633	6.40329	5.39346	12.8996	14.6344	12.3043
ENSMUSG00000006941	7.84939	8.28117	7.6503	7.57778	6.81388	4.99327	17.4387	14.4582	13.1098
ENSMUSG00000027533	22.5617	14.4396	14.9447	12.6152	8.09059	8.65213	9.24389	5.99597	4.01418
ENSMUSG00000027673	7.05574	5.75491	5.12361	7.33401	5.48344	6.14062	3.21354	3.54422	2.39638
ENSMUSG00000044017	0.904095	1.19687	0.977428	1.31044	1.22613	1.76911	1.97674	2.50839	2.79209
ENSMUSG00000022111	3.8687	3.39881	4.49097	3.45626	4.1968	3.22173	8.76335	5.41437	8.28471
ENSMUSG00000094103	21.7197	19.4788	17.8019	22.7463	18.8218	17.0258	9.86731	8.26567	12.9496
ENSMUSG00000064337	222.093	383.702	376.015	137.081	171.641	138.789	235.606	172.154	251.999
ENSMUSG00000016206	2.60304	1.41419	1.80397	2.4846	1.42304	2.48558	6.1737	7.12793	4.45837
ENSMUSG00000046324	17.937	21.4987	20.0523	16.2404	26.1227	18.6101	8.56589	11.4938	11.6349
ENSMUSG00000020010	1.62905	1.13557	0.687479	0.199393	0.121666	0	0.056938	0.023238	0
ENSMUSG00000027086	3.93739	2.8375	3.45863	4.3988	3.22133	3.75488	7.1101	7.44995	5.46413
ENSMUSG00000029554	14.4459	15.886	16.3819	12.8626	13.8558	14.1977	7.3287	9.29125	8.53924
ENSMUSG00000026571	2.59943	2.47602	3.02789	3.10192	2.44442	2.98544	4.90753	5.22113	4.77975
ENSMUSG00000051444	6.10971	5.48662	5.46284	6.32089	5.1132	5.62691	3.02134	2.57129	2.06881
ENSMUSG00000020251	0.529407	0.483271	0.444583	0.875172	0.675285	0.61122	0.0522074	0.0972718	0
ENSMUSG00000028068	14.7628	19.3625	20.3612	13.7439	17.0469	17.2886	7.90974	10.0539	10.6081
ENSMUSG00000106106	648.745	4232.62	5570.63	730.983	1904.78	748.173	572.643	483.171	550.45
ENSMUSG00000016496	1.68217	1.57494	1.36674	4.43604	3.6985	3.39444	2.86889	2.79665	3.82793
ENSMUSG00000042082	17.6078	17.7728	16.5239	18.302	16.987	17.2068	8.12307	8.37005	12.4613
ENSMUSG00000102224	0.668186	0.452752	0.152808	0.497989	0.510176	0.768657	2.66379	1.33809	3.77381
ENSMUSG00000021124	38.3175	33.2389	36.5348	36.4908	28.6296	30.6763	21.2599	18.9654	16.8756
ENSMUSG00000020311	6.43294	4.15667	4.52656	7.75267	6.68444	7.20823	10.6535	10.5265	10.2068
ENSMUSG00000028343	23.9978	20.5431	21.3034	24.1098	19.8354	20.3494	40.9787	34.1734	32.699
ENSMUSG00000027680	24.8321	24.3167	26.1257	24.2377	24.6599	23.4283	15.4987	15.0682	15.224
ENSMUSG00000014776	1.40618	1.32844	1.42342	1.07964	1.44155	0.891682	3.48122	2.66372	2.94965
ENSMUSG00000024847	27.6881	25.4756	28.112	25.9972	23.9418	24.1812	16.6392	14.9915	12.0022
ENSMUSG00000013076	3.40058	4.92355	5.06924	4.49983	5.84825	6.37212	2.12942	3.05849	1.31477
ENSMUSG00000027377	0.965873	0.464597	0.645848	1.07032	1.2935	0.910784	0.202976	0.031804	0.066634
ENSMUSG00000021411	13.8189	6.56493	12.9332	18.0653	18.6807	19.4198	30.915	21.2474	26.5784
ENSMUSG00000079669	0.925873	0.965351	0.536512	0.56877	0.568817	0.67301	0.073837	0.063887	0.084308
ENSMUSG00000004040	11.2402	12.2477	11.5674	9.03349	10.3964	9.94435	15.1797	17.1833	17.3818
ENSMUSG00000041594	1.21902	1.02425	1.29372	1.54245	1.28953	1.49179	2.452	2.39291	2.52308
ENSMUSG00000106825	4.65374	5.54108	5.72882	4.44834	5.35572	5.15217	1.38852	1.72555	2.06002
ENSMUSG00000016262	0.865017	0.8596	0.813914	1.61314	1.28841	1.3359	2.45979	2.11283	2.45118
ENSMUSG00000043421	79.683	64.9721	65.9929	99.0507	93.5787	89.2539	140.166	124.265	111.476
ENSMUSG00000050240	0.537834	0.722816	0.952446	0.403729	0.552123	1.05918	1.74683	2.20704	1.99635
ENSMUSG00000034586	8.19825	9.79885	8.29753	8.00076	9.30276	9.82966	12.771	16.0326	17.571
ENSMUSG00000025418	0.187622	0.221194	0.194295	0.113323	0.195148	0.061715	0.854009	0.742374	0.934658
ENSMUSG00000024790	10.5933	11.1796	9.10175	6.13487	6.57672	6.17393	4.83804	4.14342	3.8579
ENSMUSG00000041895	3.17077	4.75042	4.14591	5.45339	6.53356	7.15997	6.94796	9.0371	9.66564
ENSMUSG00000020572	12.817	12.0248	11.6221	9.93253	8.77992	9.75765	17.0356	16.7535	15.9041
ENSMUSG00000038260	0.24231	0.236483	0.286653	0.412978	0.435515	0.409237	0.574399	0.869966	0.834892
ENSMUSG00000059363	11.1676	13.3335	8.79505	9.57262	7.56623	9.35954	5.99512	4.21471	4.21904
ENSMUSG00000042845	6.03839	3.61165	4.09957	5.09784	4.87734	4.58553	1.46334	1.30729	1.16247
ENSMUSG00000051341	6.81276	9.38411	7.94313	6.83425	7.82248	9.36712	4.10594	4.60087	3.30885
ENSMUSG00000031880	1.68036	1.60274	2.01208	1.47086	2.40433	1.40579	0.29349	0.379165	0.500124
ENSMUSG00000118087	6.61034	4.4251	4.41443	4.04799	4.25497	4.01846	2.12878	1.51351	1.72262
ENSMUSG00000003573	13.0014	13.8142	13.2343	15.1351	16.3363	15.013	7.56883	8.2005	9.46559
ENSMUSG00000046546	9.75225	10.1644	11.015	18.4921	19.7164	18.429	15.0892	14.8818	14.4021
ENSMUSG00000002068	29.8969	22.6713	23.0422	18.8763	15.594	16.9657	14.7961	12.3235	12.1591
ENSMUSG00000033105	2.88448	3.26806	3.09535	1.68285	1.8892	2.19912	1.4099	1.82116	1.50155
ENSMUSG00000047496	0.0185795	0.0255178	0.0535418	0.00601865	0.021012	0.0544664	0.190698	0.299667	0.267385
ENSMUSG00000043003	0.205326	0.219763	0.299917	0.31183	0.274739	0.174399	0.0270615	0	0
ENSMUSG00000021036	26.3252	23.5447	24.5229	27.9111	22.7771	23.9656	16.2166	14.713	12.1779
ENSMUSG00000033938	11.9834	12.8326	12.0501	11.1268	9.50582	9.85504	7.59907	6.15305	5.55194
ENSMUSG00000020496	95.7452	98.8552	95.0081	80.6234	93.5838	90.3849	53.1405	58.3514	58.7206
ENSMUSG00000028772	3.4599	3.407	3.96709	2.5141	2.41933	2.23239	1.77257	1.40142	1.5628
ENSMUSG00000074796	5.40458	6.523	6.22796	8.179	10.1834	8.79581	3.64005	3.86251	5.60419
ENSMUSG00000001424	18.2369	20.6987	20.6206	19.0235	23.1514	21.8914	31.7878	38.4507	31.5357
ENSMUSG00000054057	1.82106	1.98285	2.01575	2.08176	1.97316	2.24224	0.805515	0.851339	0.665872
ENSMUSG00000031967	22.3084	20.5858	25.419	24.0141	25.944	24.6135	13.1886	16.5937	11.9597
ENSMUSG00000052415	0.460192	0.49101	0.453583	0.197254	0.199848	0.227231	0.733438	0.812164	0.737927
ENSMUSG00000020334	0.695432	0.636074	0.782871	0.698846	1.16188	0.981818	1.96059	2.67515	2.18333
ENSMUSG00000031143	6.62443	8.25279	8.18892	8.30742	7.81555	9.93774	3.41652	5.32002	3.5203
ENSMUSG00000021703	16.6902	17.3726	16.1386	16.7518	17.9075	16.9382	10.2366	11.3439	9.56566
ENSMUSG00000026029	44.9328	34.6154	33.0843	41.8232	36.7544	34.6872	25.7347	16.8053	17.7494
ENSMUSG00000062785	0.205965	0.467201	0.689561	0.290437	0.71434	0.694467	1.42284	1.65563	2.12989
ENSMUSG00000020312	2.12349	2.34164	2.19953	2.71855	2.81024	2.95811	1.09359	1.26257	1.37779
ENSMUSG00000029601	0.988069	1.06824	1.20162	0.639274	0.730839	0.737507	0.157317	0.149979	0.116094
ENSMUSG00000021760	68.5642	50.6822	51.2439	61.3234	46.1703	47.5036	34.2548	26.3764	21.5901
ENSMUSG00000027831	0.286149	0.227517	0.40665	0.214398	0.434332	0.397142	0.0468494	0.0298253	0.0822739
ENSMUSG00000117655	0.275086	0.19762	0.404949	0.539175	0.197391	0.320151	0.0249534	0	0
ENSMUSG00000111977	0.755157	0.713294	0.697861	1.45965	1.02147	1.03325	0.06226	0.152642	0.188752
ENSMUSG00000032640	9.96739	10.4101	11.5193	8.87662	10.1006	10.7116	5.16696	5.9489	6.37857
ENSMUSG00000090322	0.299949	0.342941	0.402632	0.105949	0	0	2.60038	0.868652	2.32675
ENSMUSG00000000339	33.9618	31.736	30.5695	28.9456	26.9672	24.7705	17.4279	18.9238	15.8321
ENSMUSG00000035504	7.71241	9.95919	8.28872	8.89164	11.4882	11.3076	16.9519	19.3255	14.3519
ENSMUSG00000030590	1.96591	2.07973	2.52701	1.14646	1.70196	1.59081	3.53646	3.79452	4.55628
ENSMUSG00000028937	63.3716	56.042	59.658	57.4448	57.9356	60.8644	39.213	35.6789	34.9992
ENSMUSG00000015222	0.00959868	0	0	0.0247272	0.0296584	0.0522767	0.11279	0.0899469	0.135785
ENSMUSG00000001380	63.6866	59.9503	64.2669	60.2095	57.773	56.488	39.8552	39.23	33.1614
ENSMUSG00000024163	3.90581	5.09462	5.12936	4.10777	4.861	4.33059	6.19452	8.58071	8.65232
ENSMUSG00000010914	12.262	12.4032	10.6366	10.1341	10.2033	10.2679	7.05264	6.08333	6.10244
ENSMUSG00000029375	14.8832	10.0353	13.9075	11.8144	8.95566	9.10694	7.38529	4.39588	4.16352
ENSMUSG00000000751	43.8328	25.9543	41.2449	23.055	26.0646	24.5889	19.0735	19.8908	19.0207
ENSMUSG00000032116	38.0533	34.6071	33.5602	38.7949	34.8152	35.4996	65.6383	59.8659	55.1161
ENSMUSG00000041180	0.768872	0.709054	0.79381	0.691111	0.847711	0.702019	1.71369	1.67555	1.30569
ENSMUSG00000068250	0.772789	0.727879	0.606024	1.30051	0.952193	1.22698	1.41748	1.5002	1.36224
ENSMUSG00000004798	4.44887	5.96992	5.37907	5.7546	6.84661	6.90296	2.9885	2.91082	3.83813
ENSMUSG00000027018	47.7198	34.3535	37.241	38.8539	31.8758	30.3943	24.1592	20.0428	15.0059
ENSMUSG00000031502	33.9935	43.8222	52.4751	50.6134	64.3478	65.4248	22.5637	31.6057	31.9397
ENSMUSG00000028410	54.9315	41.1606	48.4664	41.7433	34.8111	34.0198	27.4482	25.4548	17.4058
ENSMUSG00000045098	3.44082	3.96989	3.917	3.99697	4.4221	4.72564	2.52573	2.54349	1.78987
ENSMUSG00000005161	87.4777	67.5223	76.2078	77.6565	75.2911	70.7265	50.1323	43.7853	30.9989
ENSMUSG00000003644	2.26206	2.59294	2.70442	1.56332	2.02429	1.36332	3.18253	4.28777	4.42893
ENSMUSG00000031617	20.3114	18.6359	20.8851	14.5852	14.2967	14.6354	10.3171	10.2329	12.121
ENSMUSG00000057123	0.900375	1.19862	1.70338	1.27467	1.45697	0.997601	0.556393	0.263202	0.322087
ENSMUSG00000030101	18.7398	15.7469	17.5659	16.5474	16.5511	17.0212	10.5382	10.4034	8.60231
ENSMUSG00000105501	0.120442	0.563662	0.18107	0.260038	0.204178	0.427842	0.958677	1.84502	2.00626
ENSMUSG00000040747	3.94735	3.97507	3.46682	4.49505	3.43828	4.38521	9.37425	6.96679	8.71034
ENSMUSG00000023036	1.00774	0.698827	0.85464	10.1847	0.77646	0.51307	0.312437	0.394088	0.334266
ENSMUSG00000038843	0.360307	0.374495	0.482646	0.805175	0.794471	0.670373	0.173351	0.221239	0.191156
ENSMUSG00000044030	20.4867	19.1066	18.7694	15.832	16.9418	14.7957	9.92244	11.8708	9.78266
ENSMUSG00000037993	18.5507	24.8685	25.3574	15.3731	20.9067	20.7649	9.14551	13.0374	12.5124
ENSMUSG00000026657	1.77131	2.97926	2.88505	1.8117	2.46786	2.53845	0.783889	1.07193	1.45115
ENSMUSG00000023089	34.2266	27.7421	29.8504	25.9485	25.6538	24.0923	16.2311	17.3535	11.6631
ENSMUSG00000047866	12.8897	11.1215	14.4588	14.1028	12.837	11.0399	6.98581	6.80268	8.16644
ENSMUSG00000026285	0.716636	1.28386	1.21881	0.77842	0.781707	1.5497	0.107234	0.219601	0.185101
ENSMUSG00000001313	3.10118	4.29565	3.26418	3.83815	4.84141	3.94429	1.84055	1.22658	0.69574
ENSMUSG00000026229	42.8005	44.3772	41.0881	35.7209	35.5729	35.2093	24.0238	24.7923	25.1108
ENSMUSG00000079852	3.02145	1.74749	2.62517	1.48741	0.862459	2.27328	0.447981	0.390521	0.412935
ENSMUSG00000110033	2.24118	1.3461	2.55366	1.93132	1.37197	2.16072	0.407806	0.169947	0.351542
ENSMUSG00000030714	16.4863	18.0033	18.2183	12.5436	13.2894	13.2336	9.79095	7.42508	9.44106
ENSMUSG00000025969	12.7117	16.6142	16.2133	11.7945	14.7119	14.0737	5.78292	8.22882	9.58318
ENSMUSG00000045005	6.92252	7.46062	7.61887	4.39007	5.04808	5.46417	8.16165	9.25607	9.83055
ENSMUSG00000049800	5.61763	7.47465	6.43477	6.34898	6.75809	7.17656	10.1935	11.1928	11.8405
ENSMUSG00000074863	1.06869	1.15107	0.987292	1.09062	1.25501	1.19913	0.504089	0.451412	0.316303
ENSMUSG00000036019	0.910406	1.10751	0.994136	1.08637	1.13906	0.875118	1.97118	2.02026	2.15445
ENSMUSG00000028964	22.7383	19.3871	21.5993	21.3595	22.5409	21.7213	12.3933	14.0619	9.64161
ENSMUSG00000024925	14.7179	14.2276	15.1516	13.8524	11.6151	12.143	7.87376	7.54133	4.15627
ENSMUSG00000030123	1.53167	1.77283	1.50084	1.58154	1.48286	1.64272	0.511806	0.787205	0.759442
ENSMUSG00000025130	306.752	268.432	282.428	322.084	304.191	306.992	605.171	570.355	471.629
ENSMUSG00000058427	7.35823	8.16413	5.86976	10.9134	9.41915	6.76276	4.60907	3.04733	3.21017
ENSMUSG00000037531	6.23902	4.10232	4.85811	4.8412	4.18795	4.24117	2.80662	2.31442	1.84299
ENSMUSG00000035910	0.346365	0.432593	0.321725	0.306188	0.375597	0.479156	0.1165	0.0945617	0.0816032
ENSMUSG00000026785	3.91095	4.28392	5.22978	5.79446	6.9455	6.71498	2.65479	3.50313	3.31091
ENSMUSG00000015363	6.62074	5.05581	6.44538	5.87215	7.02046	7.97082	9.02903	14.1572	11.9026
ENSMUSG00000002055	11.79	13.1969	13.5902	10.1645	10.9792	11.2826	7.82897	7.23492	6.89671
ENSMUSG00000031864	8.66219	7.76034	7.3001	6.44418	6.5276	6.82906	4.05266	4.59007	4.42998
ENSMUSG00000040462	29.3524	35.8724	37.3562	36.4866	44.1667	43.8367	51.7647	61.8292	66.863
ENSMUSG00000021504	8.23959	7.67112	8.48894	10.4212	11.7792	10.934	5.74601	6.27401	4.96226
ENSMUSG00000002043	4.23318	4.67799	4.06188	6.52683	5.64851	5.92403	10.3011	10.3998	8.5901
ENSMUSG00000059552	61.0432	60.9525	56.6873	48.6554	48.305	44.2749	30.2581	31.8101	39.1621
ENSMUSG00000056888	24.1007	28.4363	18.6861	30.8442	29.5034	23.6622	15.2665	11.7509	14.2749
ENSMUSG00000025024	15.7828	12.9412	10.3423	15.3662	13.2166	14.5133	28.5356	22.2494	21.895
ENSMUSG00000022070	2.37141	2.59361	2.84934	2.3	1.73051	1.98427	3.92145	4.26662	4.28281
ENSMUSG00000027349	26.2509	22.3189	21.4472	20.4449	19.136	19.3769	14.5328	11.9311	12.7174
ENSMUSG00000024507	32.7734	31.7895	33.5034	28.4972	27.368	26.8826	19.1693	20.5607	17.2432
ENSMUSG00000032221	1.04084	0.874226	1.20968	0.797273	0.746726	0.375148	0.314054	0.19894	0.0791631
ENSMUSG00000050379	0.754781	0.66509	0.679138	0.651079	0.689766	0.83044	1.25793	1.58402	1.5726
ENSMUSG00000022865	16.9567	18.2586	18.3088	23.0375	23.058	22.137	29.8665	32.0016	29.11
ENSMUSG00000026020	15.9626	16.019	14.383	15.9007	13.881	14.5223	23.5246	22.9907	24.5587
ENSMUSG00000025245	0.767998	0.841133	0.912649	1.03608	0.846353	0.903705	0.422888	0.325292	0.417844
ENSMUSG00000053897	2.90941	2.75329	2.51436	2.24696	2.07585	2.18869	1.20827	1.45694	1.36366
ENSMUSG00000026047	23.7174	20.0285	20.8138	16.4372	16.3364	14.2595	13.2411	10.8853	11.101
ENSMUSG00000097814	0.562941	0.527994	0.457158	0.548533	0.754145	0.316264	0.121154	0.108023	0.0765876
ENSMUSG00000030120	73.8567	77.7615	74.5927	64.1086	65.7377	69.476	41.9125	39.5148	48.6397
ENSMUSG00000086649	2.50245	1.75036	2.84868	2.47566	1.14099	0.685046	0.430528	0.168087	0.281106
ENSMUSG00000081441	3.86426	7.31139	4.10227	5.52873	4.29086	0.968007	0.710021	1.0245	0.268953
ENSMUSG00000031833	2.57229	2.90848	2.77789	2.33996	3.11344	3.3478	4.23105	5.33185	5.98019
ENSMUSG00000002984	22.9733	20.8082	20.7847	16.8841	19.1152	20.0946	12.7837	13.4198	9.91311
ENSMUSG00000037070	121.958	119.926	110.393	87.1055	79.3078	78.6141	75.7411	65.6708	68.8875
ENSMUSG00000070337	0.611915	0.854729	0.76956	0.653309	0.650206	0.514224	0.183766	0.290298	0.270305
ENSMUSG00000031637	0.0304515	0.0858333	0.033991	0.125975	0.0919536	0.0241749	0.443942	0.472734	0.446353
ENSMUSG00000003154	4.45823	5.52056	5.00942	5.132	5.84479	6.48878	8.00048	8.88507	10.5079
ENSMUSG00000054517	3.73942	3.91239	3.65745	2.92119	2.72072	2.98061	1.94324	1.979	1.77473
ENSMUSG00000028100	2.26477	2.35404	1.33556	1.14617	1.15139	1.47239	0.370267	0.575259	0.14093
ENSMUSG00000026187	27.1841	23.1247	23.7434	25.0678	22.8336	23.2316	15.87	13.9086	13.1521
ENSMUSG00000034333	3.85576	5.26584	5.5033	3.92183	4.18209	3.08872	1.59117	2.73793	2.15124
ENSMUSG00000028678	22.6749	23.0151	21.3481	20.1391	20.0611	17.8727	13.4027	12.6887	13.2665
ENSMUSG00000001767	17.6848	17.4737	16.927	16.2134	14.8099	14.8802	10.4546	9.81408	9.87329
ENSMUSG00000012609	0.62212	1.01297	1.0949	0.748016	0.795929	0.841621	0.257005	0.413032	0.401888
ENSMUSG00000041920	2.08539	2.32014	1.98028	1.74807	1.58932	1.68971	3.10511	3.62283	3.87643
ENSMUSG00000032905	5.24986	4.90123	4.88711	6.79323	6.26244	5.6637	10.2908	9.46732	7.54467
ENSMUSG00000021065	6.09739	4.97021	5.26141	7.22377	6.60269	6.83179	4.10614	3.60354	3.49226
ENSMUSG00000060961	5.77775	6.3485	6.76077	5.26114	5.90951	5.11465	2.88417	3.96141	3.61527
ENSMUSG00000034159	4.47498	3.39672	3.97031	5.83733	5.97817	5.49514	2.21627	2.14932	2.78259
ENSMUSG00000069744	49.3494	45.5981	46.1968	39.8891	38.243	39.6701	29.6347	28.2362	22.0698
ENSMUSG00000005958	0.797464	0.935164	0.829504	1.69304	2.13595	2.04918	0.853084	1.18725	1.05601
ENSMUSG00000010025	53.8763	47.9479	50.0159	50.8535	49.299	45.1055	32.6943	29.5652	27.9469
ENSMUSG00000026430	2.54612	2.62708	3.13488	2.39706	2.54696	1.95061	4.17808	4.70235	5.65024
ENSMUSG00000028954	13.4829	13.6061	13.2369	15.1024	17.2162	16.3494	21.2243	22.6751	23.9785
ENSMUSG00000030844	4.09909	1.98863	2.49591	3.21891	2.43071	2.0864	0.727047	0.792494	0.922072
ENSMUSG00000004231	6.38379	7.56747	7.46945	4.52454	5.13142	6.38361	2.50676	2.96071	4.40603
ENSMUSG00000032068	1.58187	1.67245	1.72147	2.60781	2.9974	2.63522	0.632161	0.920425	0.934892
ENSMUSG00000111291	1.38821	1.17681	1.6989	1.69956	1.89924	4.14619	5.39698	5.27983	3.63406
ENSMUSG00000024544	0.736954	1.57864	0.767523	1.06339	1.35281	1.28158	0.168097	0.372973	0.398241
ENSMUSG00000090145	1.08749	0.968109	1.38858	0.556161	0.350187	0.565447	0.261256	0.198164	0.0896903
ENSMUSG00000028708	3.02509	3.42253	3.64619	3.04456	3.03572	2.82485	5.68179	4.61367	6.91433
ENSMUSG00000005370	23.2728	24.2868	24.8923	18.605	20.1861	18.4368	14.0228	14.9798	13.572
ENSMUSG00000038633	57.8781	48.7297	49.997	46.1606	39.6936	40.1128	34.9548	26.2725	25.5022
ENSMUSG00000013629	11.5352	16.1325	15.6389	9.54086	12.8077	12.4921	5.70535	8.67483	7.53163
ENSMUSG00000024589	6.33439	8.78371	7.85614	6.68357	7.85134	6.14542	3.84641	4.38746	4.70894
ENSMUSG00000086395	0.746707	0.856323	0.794478	0.94999	1.16013	0.737315	0.189967	0.141473	0.28718
ENSMUSG00000082896	4.96725	4.14461	1.26669	1.75047	0.660316	0.864992	0.759009	0.923176	0.610551
ENSMUSG00000033763	0.38714	0.444963	0.553853	0.580488	0.540093	0.959699	0.100002	0.155611	0.0159238
ENSMUSG00000003423	11.638	10.2077	12.1761	12.3688	10.0215	12.565	6.67116	6.2083	5.7975
ENSMUSG00000037251	6.83459	5.88579	6.28649	6.09284	5.94444	5.50509	3.74265	2.88926	3.29505
ENSMUSG00000041360	22.6596	21.7462	21.8889	21.4714	18.231	19.5979	12.6877	11.1111	14.6251
ENSMUSG00000058833	10.4139	9.43718	8.91349	8.47649	6.68203	7.06222	4.83522	4.43886	3.7486
ENSMUSG00000079057	3.33171	2.61274	2.67176	3.03224	2.72534	1.87149	5.86785	5.49124	4.75342
ENSMUSG00000037010	1.05037	0.75324	1.01592	1.4575	1.37035	2.16576	0.569018	0.301429	0.428739
ENSMUSG00000020647	0.695996	1.18895	0.989879	0.932753	1.20185	1.30186	1.7808	2.14397	2.70543
ENSMUSG00000015880	8.38937	8.55606	9.241	8.27974	8.17743	8.83488	4.90064	5.64203	4.89602
ENSMUSG00000020892	0.269438	0.295639	0.359345	0.326916	0.241836	0.138363	0.633614	0.869461	0.957502
ENSMUSG00000041460	0.387804	0.524462	0.381394	0.807875	0.595346	0.94956	1.00584	1.2657	1.20301
ENSMUSG00000042807	0.301502	0.361203	0.3812	0.291415	0.357521	0.260771	0.654662	0.772467	0.766428
ENSMUSG00000024029	6.49218	4.29178	4.76597	1.35405	3.7347	2.3379	0.51679	0	0
ENSMUSG00000037474	5.68332	5.43009	5.65079	5.82127	6.07608	5.86681	8.80716	9.61096	8.28662
ENSMUSG00000118086	0.284091	0.098555	0.163335	0.282164	0.223201	0.324414	0.800605	0.817392	1.1896
ENSMUSG00000032575	37.9454	29.5282	29.5721	30.9048	23.2013	24.4726	57.2271	45.3649	40.7751
ENSMUSG00000060904	49.7978	37.9173	43.0668	46.0746	44.3133	44.0234	85.1465	75.3387	57.5906
ENSMUSG00000050530	8.3519	9.82481	9.37007	7.15216	7.07408	8.54514	4.54435	5.07159	5.20906
ENSMUSG00000062127	6.5568	7.77236	7.59328	11.7974	13.1157	14.6651	7.95352	9.13864	11.1345
ENSMUSG00000029455	60.8615	60.1406	61.5477	74.3933	76.9465	73.5706	42.4518	42.719	43.7973
ENSMUSG00000030774	12.7451	12.6245	11.0313	17.0766	14.92	15.6281	8.37324	7.83397	9.7362
ENSMUSG00000024958	3.59091	4.03111	4.55596	3.34487	3.19031	3.89325	2.11034	1.60671	1.56991
ENSMUSG00000115263	0	0.101737	0.034569	0	0.049865	0	0.761007	0.431223	1.49229
ENSMUSG00000076490	48.4832	38.2731	42.2393	87.2761	76.6379	78.8612	62.2666	51.1501	40.7761
ENSMUSG00000031232	15.4256	13.6638	16.3993	14.8702	14.0852	13.0656	23.2136	23.8943	21.3736
ENSMUSG00000034258	6.51207	5.92288	6.91107	8.9912	8.37826	8.06166	4.13265	4.45027	4.74957
ENSMUSG00000021013	3.60707	3.53505	3.27964	3.73376	4.12328	2.85285	1.64919	1.85774	1.38677
ENSMUSG00000033701	7.71137	4.79384	3.87694	4.34026	5.60084	3.52644	9.80679	9.27579	9.79451
ENSMUSG00000034442	14.2872	14.4743	12.3809	12.7176	9.16095	10.2878	6.87222	5.97967	7.68893
ENSMUSG00000038845	50.6837	38.1688	39.3629	41.3717	38.9549	36.446	27.5651	23.8101	16.792
ENSMUSG00000022286	0.189894	0.222444	0.0687439	0.258202	0.40724	0.229019	0.799819	0.61151	0.651377
ENSMUSG00000087611	0.330901	0.227767	0.242204	0.18409	0.224804	0.058035	0.774658	0.985722	0.91615
ENSMUSG00000031629	5.28827	5.36714	4.93332	5.11247	4.58381	4.52078	2.07053	2.61667	3.10945
ENSMUSG00000015776	19.0224	17.251	19.3064	17.4878	17.7115	18.7888	12.2119	11.1803	7.81469
ENSMUSG00000076435	5.29138	5.28016	4.7716	5.06773	5.52569	5.55487	8.21387	8.38915	10.3633
ENSMUSG00000041193	0.0546415	0.135566	0.0621094	0.629448	0.659412	0.594814	0.0824562	0	0.0312602
ENSMUSG00000038225	3.85053	3.23314	3.20336	4.30096	3.77527	3.85552	6.52342	5.39608	6.66176
ENSMUSG00000029207	2.09753	1.93977	2.52118	2.20383	2.58914	2.92803	0.861686	1.1356	1.56371
ENSMUSG00000032249	31.3089	33.4018	25.667	29.6971	21.1527	22.9824	48.7753	37.9518	46.3363
ENSMUSG00000028639	355.382	461.58	412.434	338.376	345.567	339.574	184.759	190.326	237.299
ENSMUSG00000003534	18.0461	21.0445	22.094	21.3488	23.8494	25.6296	11.5626	13.6813	15.0493
ENSMUSG00000027848	3.9525	1.63116	4.05578	6.91846	6.71086	6.63045	4.79662	11.6758	14.5419
ENSMUSG00000037716	0.438706	0.710092	0.640165	0.745893	0.669785	0.763572	1.28039	1.6246	1.80029
ENSMUSG00000046032	42.76	29.9809	35.4092	34.572	29.7971	34.9662	23.2973	18.6565	12.7579
ENSMUSG00000007891	227.51	242.534	223.207	273.096	277.075	271.489	151.49	158.639	138.8
ENSMUSG00000085156	12.0482	9.81581	10.4024	10.9979	11.3678	9.84394	19.8018	19.4524	15.1907
ENSMUSG00000037573	30.1926	26.8349	25.037	35.0252	32.1442	33.9987	46.1197	44.043	48.1976
ENSMUSG00000021211	1.89054	1.33425	1.57584	3.65878	3.49705	2.5961	5.71302	4.95697	4.20712
ENSMUSG00000024587	53.8404	46.9557	56.3334	71.5737	65.3678	70.1915	98.2548	92.0391	86.5015
ENSMUSG00000083396	36.2335	27.5632	29.394	26.7112	19.1072	19.705	18.7605	12.4008	9.91793
ENSMUSG00000022761	8.49903	9.18509	9.73855	9.114	9.88274	9.68343	5.40168	6.30569	4.72833
ENSMUSG00000040084	23.283	23.8163	24.5284	18.4548	18.3445	19.2895	13.4406	14.6455	14.5811
ENSMUSG00000030591	64.0353	55.1665	64.5631	73.8729	62.0486	74.8778	116.231	83.6475	131.971
ENSMUSG00000022421	0.0303371	0.0252672	0	0.0550176	0.056349	0.0270034	0.46343	0.252541	0.205726
ENSMUSG00000020708	105.127	90.5818	98.729	90.2647	85.4179	84.8886	65.7289	57.7442	44.1102
ENSMUSG00000028494	77.7868	69.8433	68.3815	83.8577	79.6972	78.7895	139.054	131.905	102.984
ENSMUSG00000028101	2.67486	3.15925	2.09986	2.77234	3.18767	2.954	4.4952	5.12476	6.92014
ENSMUSG00000004665	54.4797	52.9956	57.5229	63.8441	68.4407	66.5259	37.5166	40.4188	41.8406
ENSMUSG00000024772	52.9297	53.4728	50.9199	52.5684	55.9448	57.1487	32.5844	31.9484	36.487
ENSMUSG00000048327	27.1554	30.3359	25.7432	24.4101	25.1021	23.4455	15.0774	15.0943	18.2415
ENSMUSG00000040690	1.22473	1.1513	1.59408	2.1631	2.09541	2.15084	0.823762	1.08468	0.745718
ENSMUSG00000022952	0.227857	0.175521	0.201779	0.253869	0.26506	0.129929	0.053621	0.00530536	0.0243398
ENSMUSG00000008734	29.5725	30.2884	26.4561	29.7884	33.7067	29.5558	18.8043	17.1646	20.3271
ENSMUSG00000030786	2.71978	2.60648	2.13171	2.90051	2.63443	3.27458	1.31762	1.40401	1.32494
ENSMUSG00000044162	0.791421	0.637893	0.61368	0.391628	0.494498	0.50757	0.218042	0.211063	0.27573
ENSMUSG00000022614	18.6489	18.2827	21.1688	14.8984	18.1562	20.8486	9.54751	10.1109	12.6809
ENSMUSG00000045038	1.91409	2.25185	1.42959	2.23804	2.58102	2.72684	3.22672	4.28005	3.97047
ENSMUSG00000045027	1.60284	2.6169	1.53878	3.7709	3.25067	2.56878	0.200511	0.719068	0.032581
ENSMUSG00000031835	14.2679	16.5504	17.258	15.8141	17.5633	19.2576	8.61684	11.6819	10.0421
ENSMUSG00000030747	2.00208	1.75094	1.69941	2.82884	4.32109	3.80175	4.37382	4.18951	4.01942
ENSMUSG00000026980	23.5475	27.5318	28.6495	22.4188	24.5205	24.2286	14.133	17.6076	15.1455
ENSMUSG00000057321	1.52657	0.958354	1.71512	1.5048	0.994043	1.13345	0.388249	0.267418	0.108318
ENSMUSG00000030061	20.3175	16.3776	17.6124	23.8296	22.0031	20.145	34.5419	30.5159	27.8483
ENSMUSG00000036098	0.169592	0.352362	0.392317	0.0785195	0.051406	0.0861207	0.0498659	0.0908903	0.0416551
ENSMUSG00000005802	12.2224	12.1809	13.9687	13.4971	14.1045	13.9789	20.514	23.7568	18.5063
ENSMUSG00000025485	4.63003	4.35501	3.86157	5.91112	6.43374	5.58317	7.67964	9.56101	6.73269
ENSMUSG00000013155	4.52182	4.72969	4.82966	3.75778	3.78682	3.19142	2.37699	2.2457	2.04072
ENSMUSG00000025650	0.830225	1.0416	0.806441	1.04622	0.790304	0.943656	1.64937	1.85211	1.73423
ENSMUSG00000019139	40.992	37.7596	38.3783	30.6754	30.9361	31.8771	23.6285	24.6953	19.6481
ENSMUSG00000033454	4.17688	3.85336	3.84517	4.1535	4.30104	4.55719	2.46409	2.72509	2.31587
ENSMUSG00000038079	10.2808	6.95763	7.6848	7.06241	6.38158	5.69167	4.46244	3.54475	2.88605
ENSMUSG00000040472	8.81842	7.84933	8.54038	10.1832	9.6537	9.24638	14.5899	16.1775	12.8852
ENSMUSG00000027932	0.614358	0.279307	0.439479	0.552929	0.271648	0.638626	0.0287326	0.0330203	0.0767388
ENSMUSG00000022514	0.190169	0.151679	0.130142	0.145268	0.0487627	0.0487821	0.0136881	0.0205923	0.0110064
ENSMUSG00000113831	0.798267	0.837852	0.533174	0.502508	0.615046	0.498585	0.155345	0.128887	0.036875
ENSMUSG00000022246	23.7117	27.0798	17.9488	38.0094	38.0378	40.8767	16.4144	21.0672	26.6493
ENSMUSG00000020415	74.4492	61.0925	55.8451	60.078	42.859	40.54	40.4888	28.3324	26.5246
ENSMUSG00000008575	4.98731	6.03441	5.91976	4.68865	6.10517	6.87175	2.89869	3.45945	3.66885
ENSMUSG00000029822	5.37309	5.90855	5.75583	7.01935	6.92733	6.68109	3.67317	4.06609	4.04455
ENSMUSG00000034175	2.62159	2.9091	3.76354	3.59208	3.99507	3.68091	1.66421	1.55194	1.47893
ENSMUSG00000049717	2.40408	2.70162	3.13719	2.06868	2.43876	1.93251	1.25294	1.32697	0.966069
ENSMUSG00000028962	11.4165	12.1771	12.3551	12.2339	16.965	14.8673	6.94938	8.66176	9.05566
ENSMUSG00000022996	0.29971	0.388263	0.458869	0.501431	0.230678	0.257753	0.01524	0.0500237	0
ENSMUSG00000022037	455.039	498.332	458.28	465.252	462.77	566.534	200.853	169.093	309.441
ENSMUSG00000045624	24.2943	23.7099	25.1929	23.4671	22.1086	21.7989	33.042	34.4042	38.997
ENSMUSG00000020669	1.34715	1.17379	1.48117	1.03548	1.07702	1.20852	0.475379	0.295057	0.220909
ENSMUSG00000006651	2.17741	2.04838	2.14931	2.12329	2.76094	2.99013	1.03856	0.947647	1.0205
ENSMUSG00000105699	4.27138	3.17214	2.79645	4.83983	5.10959	7.51434	1.33566	1.34139	1.85766
ENSMUSG00000010307	2.89499	2.76841	2.0239	4.57834	6.1262	4.22926	6.37424	5.96966	6.29744
ENSMUSG00000057421	12.9411	13.5753	13.1418	11.8873	12.5039	12.6093	8.31678	7.85697	8.30786
ENSMUSG00000036568	2.65306	3.44943	3.36389	3.82551	4.83354	4.41341	4.76833	6.29688	8.4806
ENSMUSG00000083327	52.3703	53.4699	39.0015	39.8148	48.7141	50.6767	29.9451	29.3638	20.5511
ENSMUSG00000008690	24.7836	25.9909	26.1638	23.9425	27.1271	26.7485	16.607	16.3704	16.2721
ENSMUSG00000072594	0.790748	0	0.384461	0.086526	0.340402	0	17.8643	24.5342	0
ENSMUSG00000073722	0.039813	0.17097	0.075185	0.096326	0.301592	0.113471	0.526172	0.631968	0.823426
ENSMUSG00000104953	8.4e-05	0.141927	0.155116	0.162469	27.5283	31.9763	46.2302	30.7258	0.166271
ENSMUSG00000040918	14.303	8.17819	15.4846	4.98668	6.54594	6.48211	10.2702	10.8355	16.7394
ENSMUSG00000112711	0.390403	0.284894	0.51993	0.763242	1.24088	0.716518	0.057568	0.11113	0
ENSMUSG00000027670	0.375359	0.477672	0.675657	0.597969	0.751436	0.971372	0.120023	0.148494	0.189112
ENSMUSG00000027858	14.2774	11.3406	13.7983	12.2612	11.7298	11.1222	7.92956	7.17551	7.43295
ENSMUSG00000033629	45.9537	37.7141	39.0486	38.2191	33.9149	35.067	26.1805	24.1976	16.9687
ENSMUSG00000034168	12.7854	15.4639	14.0512	21.6622	25.6121	23.7044	19.966	21.3088	22.8244
ENSMUSG00000046753	3.72342	4.08466	3.21062	5.10381	4.52932	4.34245	6.56523	6.35861	7.80345
ENSMUSG00000027194	3.61586	3.87844	3.35411	4.50159	4.70671	4.82318	5.40949	6.38344	8.22385
ENSMUSG00000032370	10.8068	10.0891	10.5791	9.33077	9.68327	8.1246	6.3659	4.95817	4.52838
ENSMUSG00000028399	1.02375	1.3776	1.54106	1.57667	1.65515	1.77215	0.719851	0.907454	0.927742
ENSMUSG00000028633	84.0642	71.2972	76.5813	76.8325	73.2392	72.0136	50.1486	49.2067	39.4392
ENSMUSG00000039206	0.799582	0.944679	0.925724	0.727934	0.830113	0.876447	0.334908	0.415561	0.356747
ENSMUSG00000011034	0.269149	0.167407	0.355328	0.126641	0.292786	0.214806	0	0.025909	0
ENSMUSG00000028381	29.1251	32.2018	27.255	32.3366	34.5466	35.6752	20.3392	21.3968	20.0286
ENSMUSG00000037965	11.6076	11.0406	12.3581	14.515	13.1124	14.4539	20.414	20.37	16.926
ENSMUSG00000002308	6.08143	4.54744	5.38842	4.69203	4.04168	3.7253	2.85567	2.20077	1.72237
ENSMUSG00000004105	0.358335	0.314258	0.221131	0.443344	0.588308	0.487485	0.0612031	0.151078	0.0940717
ENSMUSG00000038759	22.7953	25.4469	26.2004	19.736	21.8173	23.1576	13.2518	15.9699	14.9001
ENSMUSG00000026439	17.7665	17.7008	19.5516	15.9236	14.7935	15.7815	25.4799	24.8578	25.705
ENSMUSG00000022587	97.6174	74.9036	66.2397	106.076	81.181	65.9228	43.4542	47.4451	43.9709
ENSMUSG00000029019	1.87838	3.25137	2.67012	6.58992	6.16765	4.13425	10.6762	6.77425	8.40805
ENSMUSG00000031168	16.5059	13.7573	16.2822	12.6268	10.9189	11.5845	9.1528	8.68631	6.55842
ENSMUSG00000067199	0.101069	0.116605	0.257361	0.149085	0.154312	0.142296	0.873498	0.863632	0.613337
ENSMUSG00000037536	1.62596	5.63112	2.67569	1.09753	1.07746	0.593809	4.34493	1.68158	5.5178
ENSMUSG00000066026	12.7371	11.7975	10.3949	10.5899	9.62578	12.0132	18.401	17.0238	19.2057
ENSMUSG00000024590	84.8118	89.0368	93.9536	63.8674	67.7505	67.818	52.1098	57.4526	51.3954
ENSMUSG00000053128	14.4373	19.1491	18.1837	10.1594	12.5032	13.3981	7.14816	9.41062	10.3633
ENSMUSG00000020392	55.806	49.6393	49.8194	67.8509	60.485	68.4305	88.5092	88.8242	79.0165
ENSMUSG00000029992	23.9402	24.4441	25.3851	23.1681	23.0598	23.3467	35.9788	39.9309	35.5365
ENSMUSG00000019558	19.4376	21.2549	22.5225	18.0881	26.7089	20.4489	12.6194	13.3833	12.5503
ENSMUSG00000092225	0.064773	0.080181	0.044056	0.05115	0.091452	0.022851	0.494423	0.552871	0.197381
ENSMUSG00000034781	15.6012	17.6794	16.3618	17.6684	19.8926	20.8896	11.3544	12.3885	10.3297
ENSMUSG00000054716	11.4384	10.2975	8.27509	6.71998	6.53525	8.38557	5.31834	4.48156	4.10414
ENSMUSG00000025246	14.9791	15.3784	15.878	17.0238	18.204	17.7141	22.6906	24.7431	26.3914
ENSMUSG00000027944	18.8585	15.5082	15.6978	22.2463	18.506	17.3442	31.5293	27.121	29.403
ENSMUSG00000003809	8.94411	7.86908	8.48642	8.01091	7.02847	7.5442	4.49029	4.85799	2.56168
ENSMUSG00000078851	2.01017	1.72598	1.86694	4.05694	4.44936	4.13031	4.26124	4.31686	3.49367
ENSMUSG00000095562	8.84276	8.00165	7.70647	7.08772	6.49273	7.04138	11.4113	12.96	16.3507
ENSMUSG00000037973	0.612688	0.893939	0.549819	1.11512	0.841479	0.832309	0.249353	0.238037	0.0928186
ENSMUSG00000074221	9.88499	4.89431	6.55656	3.78263	4.39105	4.45051	11.5455	6.43773	11.209
ENSMUSG00000110235	1.05737	0.373461	0.714707	0.660876	0.353232	0.363727	0.0240293	0.0985924	0.0626943
ENSMUSG00000041540	0.435647	0.47674	0.371757	0.490187	0.403021	0.448744	0.696119	0.977201	1.0426
ENSMUSG00000025402	8.27408	8.3876	8.03544	12.4711	13.9898	14.2501	7.58759	8.9222	8.31704
ENSMUSG00000031776	68.2652	62.2427	63.5003	52.6307	51.2531	50.1264	42.8535	13.4518	16.6791
ENSMUSG00000078949	2.48593	2.70517	1.75151	1.25458	1.16643	1.19496	0.327945	0.56305	0.10301
ENSMUSG00000034118	8.08476	7.99917	8.67247	6.68177	6.53094	6.00105	4.52077	4.48873	4.01779
ENSMUSG00000004473	0.501677	0.540997	0.56018	1.31885	1.4297	1.09838	0.401107	0.39025	0.304013
ENSMUSG00000056708	39.8704	36.72	38.4038	38.3749	36.8614	34.9527	66.032	64.5865	47.2559
ENSMUSG00000044786	4.32487	3.95457	3.95873	6.29665	7.44346	7.2233	6.54216	7.04919	9.34132
ENSMUSG00000000538	6.72586	8.0559	7.60809	7.58639	8.30116	9.0499	10.6235	12.7384	13.7745
ENSMUSG00000043885	3.26073	3.39834	3.52338	4.43997	4.25663	3.90449	6.02694	6.55293	5.40718
ENSMUSG00000030067	0.777727	1.13646	0.7386	0.883385	0.659873	0.904133	1.37547	1.70947	1.88294
ENSMUSG00000078249	58.6161	65.7999	63.8227	57.1938	58.772	60.5673	84.4281	86.1432	113.118
ENSMUSG00000021223	0.514371	0.926255	0.745816	0.465311	0.471069	0.592117	0.125749	0.261949	0.143259
ENSMUSG00000057723	0.291963	0.186611	0.282693	0.390797	0.36853	0.115562	1.34091	1.27133	1.53402
ENSMUSG00000074817	0.291345	0.205298	0.179608	0.536463	0.465175	0.402787	0.069876	0.070271	0.011795
ENSMUSG00000069008	13.135	8.90637	9.12289	11.633	8.30986	8.60713	26.1441	16.8652	16.2118
ENSMUSG00000034126	2.01355	2.26947	2.48416	2.16994	2.2122	2.34439	1.0579	1.23374	1.28774
ENSMUSG00000021236	5.40516	5.38813	6.81195	4.25405	4.77469	3.92136	3.0724	3.45534	2.89361
ENSMUSG00000022365	66.8364	63.9218	64.003	60.5434	61.7464	64.4538	105.442	109.091	85.2927
ENSMUSG00000004633	2.87952	2.89109	3.18551	2.76339	3.05522	2.45965	1.32155	1.47442	1.71291
ENSMUSG00000030213	4.61314	6.00747	5.18627	4.75258	6.12146	6.04359	2.71359	2.92794	3.89725
ENSMUSG00000042821	5.74568	6.19588	4.24313	6.06609	6.57812	7.18596	10.458	8.63565	20.672
ENSMUSG00000024524	0.174206	0.066919	0.127544	0.132745	0.188798	0.164827	0.535165	0.389294	0.375458
ENSMUSG00000028108	85.1094	99.6691	92.5993	114.306	120.973	118.805	45.8361	46.7378	83.7658
ENSMUSG00000045662	0.555623	0.429948	0.280573	0.506145	0.712704	0.228611	0	0.051534	0
ENSMUSG00000037706	36.253	41.3505	35.4286	45.7576	45.7981	48.262	58.5426	57.4191	73.0365
ENSMUSG00000024854	7.6679	8.86885	9.27704	11.4598	13.4476	13.6956	18.9991	15.4263	17.9723
ENSMUSG00000095315	5.8493	6.54456	7.24969	6.51603	7.20092	6.46143	10.5994	11.372	11.8738
ENSMUSG00000028367	452.498	311.699	385.322	357.729	326.027	326.326	229.59	197.691	105.048
ENSMUSG00000021969	4.40646	5.37613	4.46438	6.12375	6.31293	5.88464	8.43656	8.59829	7.82986
ENSMUSG00000040380	0.087033	0.267763	0.16432	0.178229	0.257865	0.267524	0.635339	0.686154	0.853565
ENSMUSG00000026923	0.420221	0.646575	0.516009	0.27588	0.316108	0.389491	0.569756	0.930849	1.13855
ENSMUSG00000050271	1.90469	3.04436	2.59104	2.50526	3.73161	3.21112	3.94732	5.04434	6.56234
ENSMUSG00000039396	4.92659	5.13815	5.13554	4.85864	4.70804	3.92224	3.03369	2.64117	2.61999
ENSMUSG00000060803	146.719	123.501	127.895	126.182	138.281	103.854	84.4997	81.0672	61.0645
ENSMUSG00000022883	3.90409	5.78821	5.47972	3.96933	5.54369	5.31932	1.98036	2.50962	3.40307
ENSMUSG00000068245	0.739941	0.868283	0.496377	1.05382	0.769794	1.07818	2.0849	1.74445	1.85314
ENSMUSG00000086995	0.65561	0.256656	0.556882	0.746358	0.364348	0.506236	1.5791	1.30192	2.24377
ENSMUSG00000067771	2.14075	2.19133	2.4376	1.81975	4.67086	2.71714	5.43223	5.13477	7.13419
ENSMUSG00000025915	3.15504	3.64641	3.58207	2.27159	2.06198	1.58092	2.35707	2.15233	1.70664
ENSMUSG00000022064	0.444614	0.378141	0.385018	0.35553	0.36127	0.402288	0.871929	0.874631	0.790449
ENSMUSG00000029649	44.9763	31.8028	34.4633	38.3118	32.3012	31.5045	24.648	19.3993	13.3402
ENSMUSG00000028559	15.9776	11.4034	14.003	18.7179	17.2944	17.0141	25.4422	22.6041	22.0853
ENSMUSG00000028397	5.87888	6.18409	5.49348	6.66642	6.39851	6.61499	9.47302	10.1806	9.42169
ENSMUSG00000031523	3.50455	3.75678	3.41961	2.42581	3.65532	3.65402	4.75102	5.81756	6.61031
ENSMUSG00000025764	4.24842	4.88216	5.38287	5.26317	7.26408	7.19299	1.68966	4.21297	1.56504
ENSMUSG00000032480	4.34707	4.4007	5.08538	4.38464	4.6136	4.43908	2.65869	2.8432	2.81274
ENSMUSG00000052713	2.42903	3.23057	3.84808	3.58506	4.46037	3.64276	4.6569	6.42225	7.72701
ENSMUSG00000038766	5.85894	5.87846	7.05004	5.47593	5.9407	6.2041	8.42736	10.7224	8.99138
ENSMUSG00000034591	3.81451	4.41791	3.71883	4.71737	4.39123	4.16816	6.40283	7.70309	6.48369
ENSMUSG00000022586	0.899356	0.357575	0.319742	0.339181	0.336636	0.040256	2.86505	1.81621	1.74238
ENSMUSG00000036353	0.351374	0.436591	0.140959	0.407605	0.0678204	0.304085	0.0203576	0	0
ENSMUSG00000021792	9.60824	8.52084	7.87809	9.99841	8.72641	8.10323	5.54551	4.85723	4.54266
ENSMUSG00000020538	15.6507	19.865	18.449	15.9762	16.1264	19.1134	10.1516	11.4438	11.0266
ENSMUSG00000021795	1.29401	1.22011	1.34754	0.403433	0.486143	0.190019	0	0	0.148807
ENSMUSG00000073490	0.386511	0.579064	0.418407	0.574285	0.423909	0.48595	0.056716	0.137466	0.051021
ENSMUSG00000031628	97.9911	90.0938	88.8432	92.5168	80.3669	79.6002	59.5033	55.2308	50.9962
ENSMUSG00000041827	9.71811	11.9447	20.3405	13.1358	28.8833	25.3126	29.5914	34.9409	38.748
ENSMUSG00000040446	5.08098	4.66743	5.45194	4.6007	4.13091	4.16039	7.78645	8.31108	6.31344
ENSMUSG00000021539	29.111	20.57	17.61	16.2271	12.2945	10.9656	11.0287	9.10164	4.52417
ENSMUSG00000002102	55.613	48.4753	51.4909	45.7398	43.3667	49.762	34.9489	31.5913	27.745
ENSMUSG00000019428	35.1159	41.3428	39.7166	35.9235	37.302	38.8487	23.1857	24.9665	25.0362
ENSMUSG00000021994	1.65916	1.68905	1.67796	2.97585	2.79037	2.96796	2.62332	4.01543	2.80973
ENSMUSG00000032727	5.55556	6.65985	6.81417	5.74609	5.87973	6.09188	8.4048	10.6912	10.4818
ENSMUSG00000041112	1.50304	1.73004	1.55344	1.11963	1.06516	1.16789	2.01114	1.77534	2.70341
ENSMUSG00000025324	20.36	24.7978	23.8799	15.7625	17.5206	17.3727	10.7592	13.4721	15.5688
ENSMUSG00000024870	53.1244	51.02	51.1438	45.0801	46.3673	49.5732	32.7075	32.9999	31.1593
ENSMUSG00000035847	3.58781	4.66342	3.75235	3.10081	2.71466	3.00655	1.75346	1.7444	2.28978
ENSMUSG00000027679	5.73899	4.62019	5.04006	4.11217	3.20943	3.27231	2.97365	2.24268	1.95301
ENSMUSG00000028729	34.4457	33.2433	32.6208	31.7835	30.3336	26.133	22.1154	17.6279	20.2935
ENSMUSG00000089809	3.08139	3.08171	2.70592	5.14428	4.44805	5.15388	3.25734	3.19149	3.38312
ENSMUSG00000005417	22.0672	27.8472	27.6225	22.1431	26.1182	27.106	12.1537	15.4814	17.0228
ENSMUSG00000021900	5.31864	4.90793	5.55732	5.38198	6.35572	5.52725	3.16869	2.31716	2.70069
ENSMUSG00000067547	28.6888	18.3641	22.6246	17.8712	16.0469	19.7126	12.8429	10.0502	8.15447
ENSMUSG00000074445	0.414554	0.330044	0.345147	0.449157	0.721342	0.620395	0.106357	0.0869594	0.0469066
ENSMUSG00000039967	5.44864	7.37676	7.81422	6.33066	7.58008	7.11105	8.90389	12.6043	13.6634
ENSMUSG00000074277	1.50579	1.85202	2.55975	2.19913	2.68911	1.86989	3.70233	4.63962	4.92492
ENSMUSG00000071141	25.172	24.3279	12.3933	25.7509	5.91972	15.9934	6.70778	2.50912	2.29629
ENSMUSG00000020021	3.01097	3.30909	3.679	4.46526	5.15774	5.30271	5.11578	6.41481	6.17976
ENSMUSG00000040270	0.030625	0.0303248	0.0708424	0.0596674	0.17786	0.071791	0.164416	0.353595	0.342417
ENSMUSG00000111080	2.23938	1.58586	1.37217	2.85804	2.19622	2.65638	1.10315	0.94499	0.739723
ENSMUSG00000026743	2.868	4.09653	4.64532	3.73811	4.2107	5.02431	5.73711	7.8011	8.73028
ENSMUSG00000036158	6.28529	7.13871	7.18652	8.40569	9.75358	10.4271	10.41	12.532	14.3466
ENSMUSG00000023345	4.74596	4.10268	4.11886	3.31825	3.74082	3.95799	2.06902	2.19233	1.98977
ENSMUSG00000038860	0.493797	0.417556	0.545016	0.495537	0.544895	0.423651	0.247325	0.136637	0.162429
ENSMUSG00000019977	13.1648	11.9338	12.646	12.9582	12.0023	12.5561	19.8131	21.8623	16.6188
ENSMUSG00000032883	34.7869	35.6762	34.9618	41.2446	42.4802	41.4423	55.9991	53.9997	58.817
ENSMUSG00000029480	7.80584	10.4415	10.5535	6.66167	8.00633	8.4643	3.62312	4.42794	6.26819
ENSMUSG00000060429	2.18932	2.66195	2.42126	1.38436	1.47234	1.39767	2.42053	3.27165	3.18829
ENSMUSG00000017405	2.675	2.99387	3.17447	2.97568	3.6223	3.27517	1.51731	1.45358	1.93048
ENSMUSG00000009614	0.818526	0.705147	1.53883	0.979942	1.01262	1.33944	1.98739	2.94834	2.48133
ENSMUSG00000053414	4.67064	5.73765	5.85756	4.8652	5.57563	6.01908	7.5505	9.09456	9.69684
ENSMUSG00000045176	3.79797	2.69849	2.95743	3.08773	3.00074	3.05058	6.2588	5.48615	6.9897
ENSMUSG00000010911	25.4847	23.0607	21.2031	27.7897	24.1564	24.1553	15.8913	13.4553	12.0553
ENSMUSG00000032056	0.173315	0.0473484	0.179165	0.0585343	0.37002	0.0531329	0.852745	1.47246	0.77214
ENSMUSG00000030157	1.63781	1.0754	1.10883	1.19485	0.517154	0.497522	0	0.174086	0.037162
ENSMUSG00000053560	30.3191	31.2376	26.5178	50.1777	47.6433	49.8718	38.8078	33.7289	36.4896
ENSMUSG00000026627	10.7244	9.3973	9.70914	10.9382	11.5534	11.9165	17.0757	17.0608	16.4523
ENSMUSG00000032324	20.8286	15.8006	19.4011	20.3918	20.1881	17.7345	12.0205	11.9355	6.38574
ENSMUSG00000019302	15.6422	17.7575	16.646	16.406	19.1374	17.1973	10.0713	11.6133	11.2047
ENSMUSG00000055760	12.3781	9.72329	10.2675	8.52415	7.33625	7.83561	5.53197	5.21099	4.10012
ENSMUSG00000023272	19.7957	16.7719	14.6322	12.3074	10.9972	12.9063	27.1978	23.6476	19.069
ENSMUSG00000033948	0.37107	0.439905	0.440008	0.274164	0.152555	0.347863	0.742806	0.762883	1.22413
ENSMUSG00000011148	4.25728	5.27994	4.81187	7.25792	10.1845	8.30156	4.67425	4.06512	4.39326
ENSMUSG00000100291	1.44205	1.08806	1.09457	2.40767	1.42787	1.23079	0.50245	0.0670866	0.127534
ENSMUSG00000042063	3.95472	5.22387	4.29102	4.15733	4.88656	4.60502	2.45828	2.60914	2.90013
ENSMUSG00000028207	4.15734	4.20718	4.19054	3.81994	3.57486	3.8707	5.92212	6.3466	5.58385
ENSMUSG00000038578	5.28981	6.61384	5.89481	6.21586	7.28051	6.36177	9.23464	11.1332	9.88271
ENSMUSG00000059325	0.276862	0.170617	0.84272	0.566267	0.382561	0.276162	1.74716	1.71474	2.46209
ENSMUSG00000029096	0.0531875	0	0.149205	0.170246	0.164568	0.0943512	0.904632	0.508635	0.885806
ENSMUSG00000035900	12.5136	14.4363	14.7125	19.7097	24.6168	24.6089	13.3512	16.8386	16.2673
ENSMUSG00000003344	2.7642	2.7206	3.14274	3.24621	4.06302	4.14103	5.06384	5.65348	6.46113
ENSMUSG00000078784	28.1955	25.212	20.9286	21.0111	14.5024	14.4328	15.3033	11.2882	9.9972
ENSMUSG00000053559	27.1372	24.2035	16.9702	22.044	16.0202	17.4729	45.3516	28.9018	35.5078
ENSMUSG00000038803	50.6699	42.604	41.0504	37.9227	33.5935	32.7011	25.1713	23.0434	27.6417
ENSMUSG00000099767	0.5439	0.727878	0.407511	0.370412	0.335659	0.51104	0.097239	0.124115	0.111949
ENSMUSG00000083424	73.8085	12.5746	14.519	16.0706	4.36562	11.0361	2.97063	7.60126	5.51217
ENSMUSG00000027111	32.617	44.1996	45.5157	57.9901	67.8208	69.5769	61.6204	91.5018	88.1
ENSMUSG00000043207	25.7004	24.5069	24.8987	21.4964	20.8475	20.9648	16.1156	15.8802	14.5294
ENSMUSG00000083307	18.3621	12.2788	14.8916	9.18057	7.22877	7.97162	8.65644	7.52081	4.69111
ENSMUSG00000020589	0.285503	0.156598	0.140841	0.30619	0.344092	0.290944	0.0778561	0.0453953	0.0977595
ENSMUSG00000040459	27.1897	20.4315	23.1778	27.5477	22.2616	21.3836	39.0634	36.8221	35.8981
ENSMUSG00000028163	9.67611	10.5973	10.9657	9.07336	9.12496	8.75584	6.27996	6.64025	6.50167
ENSMUSG00000033020	9.5579	9.29308	9.70269	7.85127	8.17042	9.2067	5.87402	5.25645	3.85887
ENSMUSG00000074735	1.29729	2.5896	0	0	0	0	2.64382	3.31819	0
ENSMUSG00000035164	17.1629	21.5886	22.6239	19.7684	24.222	26.0488	11.9927	5.02673	13.7733
ENSMUSG00000031533	8.04949	6.98485	6.98231	6.9732	6.63106	5.67105	11.6041	10.1288	11.505
ENSMUSG00000046879	7.79716	6.72469	6.75792	5.8805	4.66625	4.93462	4.41812	3.56595	3.69821
ENSMUSG00000019802	14.5827	14.2432	13.021	16.4518	15.7257	15.0803	21.7002	22.1886	22.0867
ENSMUSG00000022108	93.9097	71.8735	74.3154	111.102	98.2731	93.8585	167.995	134.19	125.542
ENSMUSG00000108825	0.113323	0.209142	0.027914	0.148992	0.02297	0.095771	0.500793	1.03551	0.818885
ENSMUSG00000036478	23.3375	18.9968	17.6396	34.0128	27.9194	27.0659	42.935	34.2098	29.9302
ENSMUSG00000020130	20.9899	17.7659	17.4218	24.4894	21.6033	23.2374	31.9261	31.2371	28.5636
ENSMUSG00000042389	3.44395	3.47504	3.46689	2.27786	2.12467	2.4344	1.8013	1.66885	2.13831
ENSMUSG00000031075	0.965566	0.971003	1.16077	1.08181	1.10464	0.917834	0.48292	0.457184	0.29455
ENSMUSG00000026536	5.75867	7.90177	6.25097	6.14182	6.45382	4.78151	10.2642	12.0296	11.6681
ENSMUSG00000035078	8.60141	9.19675	10.4334	9.19022	9.80009	10.6567	5.06467	6.56261	5.34787
ENSMUSG00000019883	3.84846	2.51892	3.19536	3.13603	2.93258	2.23739	1.50931	1.27965	1.41643
ENSMUSG00000027953	12.747	11.9476	14.1765	15.4198	16.4456	17.0401	25.4099	20.8643	22.6717
ENSMUSG00000009905	5.92681	6.84046	6.55922	7.27934	7.56376	7.11846	4.04224	4.89406	3.75314
ENSMUSG00000038068	2.41494	2.14875	2.31814	2.99202	3.21666	2.84623	3.99608	4.81456	4.24189
ENSMUSG00000038572	2.91647	2.54279	2.62054	2.45995	2.6822	2.68002	5.7604	5.49248	5.27543
ENSMUSG00000114554	0.27101	0.0414834	0.204483	0.161727	0.0293704	0.20135	1.38103	1.13907	0.995316
ENSMUSG00000043391	4.99034	5.23896	6.08566	6.25507	7.71823	6.94956	8.83067	9.81709	9.68677
ENSMUSG00000037139	0.189225	0.210178	0.227748	0.244509	0.215236	0.156288	0.543165	0.680285	0.599498
ENSMUSG00000085586	1.08097	0.662109	0.729102	1.06337	1.12002	1.33909	2.78114	2.6985	2.08752
ENSMUSG00000044026	14.7789	14.1231	16.588	12.7789	11.9147	12.2186	9.83284	9.14276	7.00902
ENSMUSG00000024646	16.6919	13.128	11.1137	14.92	11.0167	8.87146	7.86328	5.45774	6.54818
ENSMUSG00000049382	330.004	305.982	323.666	419.034	422.812	421.98	240.582	242.279	211.143
ENSMUSG00000097639	3.23725	3.81174	4.751	3.67229	4.2594	3.21095	1.53676	1.88248	1.84519
ENSMUSG00000053553	12.543	13.9764	12.7569	9.73232	9.46774	10.2688	7.01384	8.3062	6.77424
ENSMUSG00000047604	0.599911	0.492675	0.61502	1.17385	1.30479	1.27493	2.14083	2.09613	1.49263
ENSMUSG00000038252	26.488	30.5142	31.9533	28.1029	31.6869	32.8358	16.2696	20.3098	20.1573
ENSMUSG00000074829	0.847139	0.70558	0.751255	1.08021	1.08691	1.38722	2.20344	1.72009	2.01736
ENSMUSG00000020773	22.0694	22.0932	21.4725	22.4296	23.094	24.2404	15.1168	13.9817	13.8201
ENSMUSG00000020580	14.2725	17.9894	16.7056	19.2226	21.2035	21.6199	24.3728	29.5555	30.6965
ENSMUSG00000039523	5.27126	5.63424	6.17933	4.89506	5.93027	6.04497	3.04784	3.09023	3.76077
ENSMUSG00000003604	5.3861	4.14602	4.22882	4.21728	3.52235	3.15458	2.87135	1.85469	1.72861
ENSMUSG00000107877	0.911447	0.182367	0.343109	0.111431	0.1556	0.129376	0.055024	0.116574	0.114407
ENSMUSG00000027854	5.61328	5.22802	5.09578	6.61221	4.68502	6.47435	9.05756	8.26031	9.12367
ENSMUSG00000033871	0.75092	1.31761	1.37514	0.556582	0.758917	0.856463	1.44605	2.77212	2.29829
ENSMUSG00000038495	6.89498	8.1491	8.14144	9.13566	9.99704	10.9335	5.90556	6.0289	6.02163
ENSMUSG00000045348	6.24753	8.27348	8.23247	11.8563	13.8186	13.8932	9.92806	12.7266	12.8676
ENSMUSG00000037725	25.3021	21.5237	23.1411	20.3047	16.7657	14.8329	15.1193	12.293	12.4926
ENSMUSG00000104394	0.722887	0.73057	0.685888	0.908829	0.931911	1.01273	2.26955	1.81636	1.4401
ENSMUSG00000002617	0.809129	1.02503	0.673565	0.45443	0.522418	0.368748	1.54158	1.2394	1.16866
ENSMUSG00000023971	10.1689	7.27727	9.33188	4.9328	5.56704	7.29132	4.81411	4.05248	3.8584
ENSMUSG00000086494	5.97361	6.23436	4.23155	4.41476	3.867	4.71409	1.63259	1.34787	1.4299
ENSMUSG00000089715	8.70061	12.4275	12.4363	9.17228	12.0679	12.6843	6.4396	7.28658	6.33849
ENSMUSG00000027067	116.268	113.204	108.94	104.143	100.645	84.7245	69.3273	65.6098	62.443
ENSMUSG00000059791	3.33383	6.01787	5.097	6.18827	5.27724	6.8565	10.9255	9.58724	11.5326
ENSMUSG00000052146	101.428	78.6684	77.8181	99.2991	78.3363	79.3549	153.122	111.713	161.969
ENSMUSG00000033880	11.0537	18.8286	11.9238	20.3899	14.1258	20.6855	8.449	8.40225	10.0491
ENSMUSG00000021271	2.4639	2.4931	2.49324	3.40032	3.32784	3.09365	1.16015	1.88184	1.10037
ENSMUSG00000082809	49.5785	1.6338	2.93472	3.93438	2.47185	1.84182	3.35847	1.20443	1.50752
ENSMUSG00000078517	4.0419	5.21386	5.62681	3.86661	4.86022	5.03339	2.37797	2.9757	2.83319
ENSMUSG00000026984	1.75327	1.10951	2.19209	2.35793	0.756181	1.34428	0.205448	0	0
ENSMUSG00000035493	0	0	0.0233729	0.0138117	0	0.0360222	0.217448	0.40815	0.244587
ENSMUSG00000055737	0.538791	0.531556	0.482937	0.725389	0.410364	0.643218	0.243311	0.143058	0.212299
ENSMUSG00000029432	5.09047	7.15378	8.47256	12.6017	12.8057	12.3926	13.6948	11.963	10.7133
ENSMUSG00000050567	7.78264	9.39168	9.45805	10.0816	11.759	11.3585	12.2479	16.2268	17.7023
ENSMUSG00000024158	11.4995	9.13468	11.6447	11.5941	11.6661	10.2861	21.7788	19.7813	14.5379
ENSMUSG00000020173	3.21329	2.84636	3.93321	3.91482	3.45559	3.97114	1.91075	1.90739	2.35186
ENSMUSG00000023017	0.999361	1.14982	1.30039	1.37173	1.19874	1.48794	0.512634	0.660363	0.301991
ENSMUSG00000023980	3.65308	3.91647	4.10693	3.82454	3.76527	3.36467	5.26949	6.02373	8.00859
ENSMUSG00000021981	4.08754	3.89525	4.12829	3.57829	3.13571	3.11515	5.57456	5.76747	5.47578
ENSMUSG00000025271	2.13292	1.85379	2.17789	1.60449	1.60075	1.4398	0.848386	0.713298	0.937005
ENSMUSG00000020962	8.11302	5.83214	6.1115	7.28959	6.61827	6.70151	4.59527	3.83514	2.82042
ENSMUSG00000020027	0.579787	0.241942	0.454749	0.740258	0.846739	0.563545	1.33965	1.10163	1.08983
ENSMUSG00000038241	7.27912	11.9424	11.3475	6.89627	10.0948	10.2207	3.59723	5.63406	5.91701
ENSMUSG00000020387	3.01438	3.01415	4.18043	3.53871	4.84244	4.71962	1.70249	2.60871	2.32795
ENSMUSG00000041408	8.21165	10.0802	10.1974	9.43459	11.8252	12.005	15.1093	16.6533	15.3671
ENSMUSG00000038398	5.52524	5.50559	4.97313	5.02638	4.57911	4.04324	3.18841	2.7221	3.03271
ENSMUSG00000032323	0.493403	0.553193	0.401865	0.150482	0.00932983	0.172458	0	0	0.037401
ENSMUSG00000069910	11.8168	11.9674	12.1683	9.5267	8.53616	8.99534	6.69581	6.72474	7.40593
ENSMUSG00000034796	0.165676	0.139854	0.335777	0.350386	0.332016	0.405239	0.0720948	0.047704	0.0332032
ENSMUSG00000024477	4.83596	5.17991	5.40458	5.51148	5.94472	5.57987	7.99134	8.05956	8.10449
ENSMUSG00000041498	3.62396	3.80385	4.97774	2.86022	3.68931	3.62875	1.77363	2.47485	2.31068
ENSMUSG00000033373	8.22244	7.32595	7.71475	6.35286	5.81714	5.93092	4.12627	4.41621	4.4949
ENSMUSG00000071528	48.7856	27.6125	35.7691	41.9561	32.1319	30.9648	24.6098	16.7545	11.2472
ENSMUSG00000005483	30.1132	26.8169	26.893	20.6304	20.3476	20.6874	18.8028	15.4835	16.7644
ENSMUSG00000053931	123.294	125.855	113.894	99.95	100.052	104.034	71.6589	64.139	79.0677
ENSMUSG00000038598	0.111266	0.157989	0.335468	0.353536	0.177178	0.292197	0.0408474	0.0294294	0.00473177
ENSMUSG00000070546	2.7952	1.37225	1.69558	2.42209	1.48179	2.02751	0.511521	0.278291	0.044675
ENSMUSG00000027109	18.3769	16.9159	17.3998	20.2811	17.6256	20.08	26.5671	26.5268	28.7408
ENSMUSG00000029727	10.5651	8.93279	8.76864	17.8099	16.5321	14.1275	20.4511	17.1393	12.91
ENSMUSG00000026278	13.832	10.2915	13.7826	5.57257	12.9035	12.3918	6.56593	4.525	2.80348
ENSMUSG00000046434	325.913	321.904	319.83	336.349	319.971	336.901	199.742	195.702	161.548
ENSMUSG00000045092	12.6341	12.7486	12.0908	10.8915	10.7476	9.05337	6.26366	5.5555	8.41691
ENSMUSG00000024999	19.6535	20.2116	20.1583	17.7289	16.2369	16.3595	12.4081	12.636	11.7353
ENSMUSG00000082629	0.029383	0.009145	0.025077	0.650775	0.244082	0.264814	0.286872	1.05925	0.099243
ENSMUSG00000035941	10.8357	11.1737	9.96184	12.6752	15.8334	17.011	20.4439	17.8846	15.4742
ENSMUSG00000072115	9.44502	8.31429	8.75007	9.01554	8.50011	8.09905	16.6579	14.0976	15.1118
ENSMUSG00000045838	9.5018	10.818	10.6372	14.3688	15.6643	13.8514	7.51535	8.7745	9.70613
ENSMUSG00000031521	17.5129	13.5267	13.8657	17.0521	16.4992	16.0651	10.4205	9.62932	7.01155
ENSMUSG00000039254	3.02993	3.01177	3.19987	2.8934	3.85438	3.61729	1.56792	1.99546	1.9778
ENSMUSG00000026692	7.75243	7.18669	6.42621	6.81507	4.90553	5.10463	11.5315	9.37168	9.69993
ENSMUSG00000027712	245.61	188.627	198.95	274.509	241.933	242.762	163.324	139.75	110.26
ENSMUSG00000052917	0.598914	0.660001	0.736401	0.749113	0.564624	0.759563	1.16424	1.20266	1.37651
ENSMUSG00000116835	162.58	119.184	15.9974	38.0489	13.7806	114.556	4.78495	13.7498	15.4516
ENSMUSG00000061451	1.34091	1.61368	1.02384	0.76402	1.35631	1.24508	0.386356	0.429911	0.555253
ENSMUSG00000021606	48.759	35.9563	45.0399	40.0134	40.421	37.192	27.0289	23.3868	23.4159
ENSMUSG00000021765	10.8737	8.08719	9.22965	17.0205	15.9754	14.4196	15.7061	14.7532	13.2004
ENSMUSG00000029570	6.21942	5.4632	5.94004	8.00212	8.07745	8.72826	4.33378	4.29084	4.36599
ENSMUSG00000054387	7.36397	7.36089	8.04092	7.62635	8.26549	8.10373	11.4615	12.3376	10.7585
ENSMUSG00000037621	11.258	13.4285	10.9187	8.42362	9.00945	8.83631	12.5217	15.9382	21.5326
ENSMUSG00000036620	43.054	39.5888	36.5745	45.005	40.0703	44.804	29.1582	25.8536	25.9103
ENSMUSG00000058443	11.0334	3.32865	4.91791	10.2777	29.8271	16.3697	30.5573	102.233	7.09033
ENSMUSG00000018068	4.98399	5.48141	5.65486	4.32204	5.36035	4.53874	2.77857	3.33273	3.28453
ENSMUSG00000092274	1.85757	1.65851	1.64347	2.75567	3.0222	2.76154	3.17097	2.90007	2.31231
ENSMUSG00000024826	4.02023	4.16338	3.09253	3.47523	4.1259	4.04883	5.30705	6.50039	7.42787
ENSMUSG00000079363	0.240366	0.120097	0.2298	0.219203	0.125467	0.100756	0.615988	0.57139	0.430448
ENSMUSG00000024805	2.1087	1.62076	1.56228	1.17323	1.81388	1.47949	4.0116	3.40708	1.90856
ENSMUSG00000071506	0.52957	0.367809	0.533693	0.399833	0.406048	0.384126	0.0798325	0.0163774	0
ENSMUSG00000036097	46.1092	48.2148	54.1718	45.7706	47.233	46.8221	28.5137	32.5866	29.6971
ENSMUSG00000033952	6.1709	8.50253	8.72767	5.6103	7.63043	7.30347	3.37719	4.65236	4.78299
ENSMUSG00000039286	12.0777	13.4196	14.7327	15.1363	16.3668	17.658	9.13564	11.3816	6.67346
ENSMUSG00000029599	19.4353	22.0048	23.6693	17.7902	20.4753	19.8836	11.3291	14.1781	14.2582
ENSMUSG00000062310	8.01448	6.73599	6.07601	13.2748	11.9032	11.847	13.5805	10.5204	11.509
ENSMUSG00000047044	51.6175	38.9691	40.9052	45.2328	37.7494	40.1561	29.1773	24.7029	14.5921
ENSMUSG00000031015	3.97393	5.2346	4.7643	4.97741	5.10584	5.18642	6.74426	8.90397	7.6746
ENSMUSG00000058709	14.6634	15.2569	14.4872	12.4218	14.58	13.7985	8.60542	8.47062	9.37786
ENSMUSG00000026979	2.16069	2.58003	3.74055	3.5943	2.51041	2.6828	0.786357	1.76378	1.43219
ENSMUSG00000109674	0.111959	0.154288	0.168231	0.144011	0.24366	0.176669	0.34337	0.645952	0.510574
ENSMUSG00000029440	6.2442	6.12551	6.43419	5.66346	5.62513	5.27901	4.1982	3.30353	3.51554
ENSMUSG00000078348	14.1304	12.5196	12.0252	10.3036	9.24939	9.21136	7.34668	7.20256	8.09847
ENSMUSG00000078931	8.29816	12.0138	12.3718	7.12181	6.27533	6.13043	6.2985	3.65413	5.07067
ENSMUSG00000060601	8.34358	9.9709	8.84561	9.19709	9.84516	9.34222	13.32	13.2451	18.6551
ENSMUSG00000059981	6.39086	9.43938	7.90558	6.40048	6.48501	7.40619	3.46335	4.86639	4.83034
ENSMUSG00000028755	16.5571	13.5144	11.5381	18.4265	17.7014	20.3123	32.3553	26.2185	21.7727
ENSMUSG00000023456	193.118	175.707	175.432	162.9	164.768	165.735	302.544	291.628	241.841
ENSMUSG00000035765	1.66339	1.68323	1.5719	1.48805	1.40245	1.86833	2.83997	2.16905	3.58357
ENSMUSG00000006014	0.47838	0.399798	0.275126	0.188526	0.473647	0.258	1.00702	1.02021	1.06055
ENSMUSG00000086390	6.87921	6.5178	6.73535	4.12801	3.08422	3.4695	1.8199	0.585346	3.05043
ENSMUSG00000000555	10.0184	11.6034	12.207	11.8412	12.6262	13.428	16.2452	19.585	18.5134
ENSMUSG00000029782	6.71104	5.01939	5.78676	6.41502	7.41465	6.98026	9.56202	10.3629	8.95954
ENSMUSG00000029463	34.277	32.4037	35.1228	32.2855	28.9088	32.4629	23.0082	18.1699	19.1365
ENSMUSG00000024789	27.3352	25.4412	26.9815	35.7918	36.224	36.0918	41.2813	47.0311	39.5002
ENSMUSG00000056076	241.541	233.861	227.874	210.466	217.965	216.615	136.765	138.425	130.188
ENSMUSG00000020228	4.10527	5.37726	5.4043	4.34484	4.58835	5.09138	7.01576	8.37142	8.13092
[truncated: 2,298 more rows]

## Sheet: Sheet2
gene_id	Inter1	Inter2	Inter3	LM_phenotype1	LM_phenotype2	LM_phenotype3	Parental1	Parental2	Parental3
ENSMUSG00000000001	79.3772	63.2035	72.7818	75.6705	74.2406	74.005	89.3266	82.7997	63.0113
ENSMUSG00000000028	8.57638	7.62675	6.32225	7.9561	6.77247	8.37497	7.19292	5.87909	8.04295
ENSMUSG00000000031	0.0214791	0.0154723	0	0	0	0	0	0	0
ENSMUSG00000000049	0.36224	0	0	0.338655	0	0	0.483857	0	0.0266862
ENSMUSG00000000056	5.16477	4.3893	4.71948	6.00529	6.38199	6.3673	9.58339	10.0562	8.42952
ENSMUSG00000000058	29.3647	22.3236	24.5126	30.6754	30.4657	29.3349	29.298	26.8508	17.0392
ENSMUSG00000000078	87.8612	85.2671	90.7367	127.95	127.144	130.029	113.49	117.032	111.296
ENSMUSG00000000085	4.07002	3.91824	2.59639	2.72796	4.80528	4.83137	1.70655	1.28726	1.78447
ENSMUSG00000000088	50.9573	26.9824	34.4592	38.4912	27.6739	32.1514	28.3662	19.4702	14.2732
ENSMUSG00000000093	0	0	0	0.014364	0	0.051336	0	0.058608	0.071566
ENSMUSG00000000094	0	0	0	0.030628	0	0	0	0	0
ENSMUSG00000000120	0.718669	0.465083	0.655725	5.3616	5.35777	5.87821	0.035378	0.012343	0.065037
ENSMUSG00000000125	0	0	0	0.033864	0	0	0	0	0
ENSMUSG00000000126	0	0.117721	0	0	0	0	0.0155698	0	0
ENSMUSG00000000127	2.70217	2.92946	2.90017	3.32541	2.98369	3.3647	6.23114	5.52111	6.59438
ENSMUSG00000000131	4.59839	7.20973	6.65514	4.69206	5.84148	6.43106	3.99711	5.71605	5.97507
ENSMUSG00000000134	5.17506	5.61683	5.03474	5.81433	5.6244	5.51907	7.09179	6.77619	8.16947
ENSMUSG00000000142	33.1665	41.4357	41.6634	42.0929	45.0822	51.6834	39.0191	48.7862	59.1834
ENSMUSG00000000148	4.86165	5.54751	5.28635	4.40795	5.8108	5.38876	3.65911	3.9162	3.72864
ENSMUSG00000000149	13.2387	15.3275	18.7442	12.4722	13.9476	14.9649	11.2254	14.295	14.1944
ENSMUSG00000000154	0.539714	0.846648	0.480171	0.906162	1.33294	1.46022	0.736214	0.658952	0.759066
ENSMUSG00000000157	0.122918	0.134543	0.153698	0.0612721	0.101634	0.207053	0.0441187	0.0739863	0.0754972
ENSMUSG00000000159	6.80295	5.88323	4.85899	5.50864	6.83518	4.96359	4.27755	3.47108	4.25175
ENSMUSG00000000167	0.161439	0.203832	0.214699	0.148492	0.255926	0.149048	0.149093	0.162594	0.0801231
ENSMUSG00000000168	18.5381	15.8657	17.0206	17.4559	17.1176	15.8178	15.5969	14.6422	12.1081
ENSMUSG00000000171	82.6969	76.0891	75.9926	68.3059	64.3149	61.7162	70.7116	64.2675	48.1488
ENSMUSG00000000182	0	0	0.09892	0	0	0.051308	0	0	0
ENSMUSG00000000184	0	0	0	0.00553547	0.0190539	0	0	0	0.0191636
ENSMUSG00000000194	5.49912	4.81146	5.20294	6.21385	6.39418	6.08764	7.32591	8.3373	7.1078
ENSMUSG00000000197	0.00550884	0	0.00304869	0	0.00910524	0	0.00647925	0.0124198	0.00168721
ENSMUSG00000000202	0.380021	0.23035	0.491665	0.324709	0.646266	0.40742	0.041231	0.198392	0.0282882
ENSMUSG00000000204	0.379706	0.579385	0.564807	0.452028	0.518307	0.320526	0.0769903	0.146704	0.101705
ENSMUSG00000000214	0	0	0	0	0	0.0191305	0	0	0
ENSMUSG00000000223	0.0370665	0	0.0653773	0.0419069	0.0565161	0.00544072	0.0544979	0.0557205	0.185908
ENSMUSG00000000244	0.119398	0.178717	0.253714	0.115687	0.0707552	0.104505	0.0502373	0.142787	0.0786741
ENSMUSG00000000248	0.863811	0.462746	0.664331	0.937466	1.71709	0.533914	0.241488	0.59616	0.489322
ENSMUSG00000000253	1.27135	1.30269	1.2669	0.314682	0.710754	0.771545	0.564564	0.305683	0.210925
ENSMUSG00000000266	0.0550278	0.032199	0.0975506	0.079333	0.0929726	0.0915024	0.0063877	0	0.0166668
ENSMUSG00000000275	23.3025	23.2174	26.2618	23.9345	26.2239	26.1534	36.8583	39.0586	34.2975
ENSMUSG00000000276	1.10817	0.79377	1.02397	1.05498	0.768574	1.13874	1.42424	1.40629	1.23939
ENSMUSG00000000278	104.365	85.6697	91.7287	84.5981	77.0708	72.324	126.896	117.842	97.0571
ENSMUSG00000000282	9.19638	9.93985	10.8611	11.9075	13.2155	13.0968	13.8629	17.1948	20.5754
ENSMUSG00000000290	0.0172517	0.102272	0.0587947	0	0	0.015248	0.0339652	0.0139362	0.146294
ENSMUSG00000000295	0.0142008	0.0111053	0	0	0	0	0	0.0473464	0
ENSMUSG00000000296	0	0	0	0	0.0334	0	0	0	0
ENSMUSG00000000301	1.24028	0.745149	1.37442	0.925596	1.15255	0.828937	1.06557	0.747875	0.80501
ENSMUSG00000000303	0.361758	0.397037	0.213834	0.149793	0.186071	0.293037	0.0679502	0	0.0767938
ENSMUSG00000000305	0.0142108	0	0	0.00717671	0	0.00641265	0	0	0.00569612
ENSMUSG00000000308	0.690095	0.271886	0.662114	0.373718	0.419288	0.125952	0.0622973	0	0
ENSMUSG00000000317	0	0	0	0	0	0.0125128	0	0	0.0121209
ENSMUSG00000000318	0	0	0.0464228	0	0	0	0	0	0
ENSMUSG00000000320	0.0116381	0.0241072	0.0219635	0.0353604	0.0109718	0.0227841	0.0067146	0	0.0222252
ENSMUSG00000000325	0.345324	0.606528	0.642618	0.479916	0.480751	0.612455	1.09055	1.35943	1.11278
ENSMUSG00000000326	15.283	16.3606	17.3063	15.521	16.4304	18.3308	18.3186	19.3089	20.0798
ENSMUSG00000000339	33.9618	31.736	30.5695	28.9456	26.9672	24.7705	17.4279	18.9238	15.8321
ENSMUSG00000000340	5.80854	4.64766	4.46229	4.38992	3.85679	4.33811	5.69264	6.32823	6.41165
ENSMUSG00000000346	90.758	93.9283	88.2834	84.5165	75.802	79.7095	82.7773	79.07	92.5201
ENSMUSG00000000355	10.0044	8.26763	8.87822	9.42157	6.74177	6.25166	11.5316	8.13566	3.93851
ENSMUSG00000000374	6.26644	7.43298	7.81344	6.53475	7.21589	6.9905	6.3478	8.29654	7.53796
ENSMUSG00000000378	18.2793	20.2168	19.4255	17.2958	20.1261	18.2694	11.9675	12.3116	12.5261
ENSMUSG00000000384	20.5328	19.4636	23.1378	14.1897	17.8607	21.463	16.0399	21.0968	21.4181
ENSMUSG00000000385	15.8459	14.7129	15.5907	15.3926	16.3706	15.6332	20.0173	19.9063	19.7955
ENSMUSG00000000386	0.451172	0.993424	0.426159	1.0642	1.13247	0.786603	0.147981	0.12353	0.11308
ENSMUSG00000000392	0	0	0	0.0183975	0	0	0	0	0
ENSMUSG00000000399	59.2292	38.8048	46.073	48.4641	45.4208	43.9629	37.0459	33.099	20.2139
ENSMUSG00000000409	0.0265442	0	0	0	0	0	0	0	0
ENSMUSG00000000416	1.24193	1.16478	1.14344	1.96147	1.62204	1.6461	0.849803	0.983732	0.806636
ENSMUSG00000000420	21.4662	18.8153	20.2343	21.9356	22.6311	20.1955	15.8633	18.4086	13.6388
ENSMUSG00000000439	4.53586	4.63186	4.26095	4.16507	4.3561	4.66216	6.32671	6.34037	6.60463
ENSMUSG00000000440	1.34393	1.75112	1.61596	1.32327	0.922405	1.53662	1.52872	1.86387	2.00057
ENSMUSG00000000441	14.9343	14.9273	15.4823	14.5204	14.5451	14.4581	14.9982	14.4694	14.5532
ENSMUSG00000000486	1.4087	0.7745	0.663809	0.41685	0.57778	0.53124	0.666133	0.534207	0.687356
ENSMUSG00000000489	13.6688	13.8094	14.2874	24.0919	27.5632	25.985	6.47068	7.6346	6.63157
ENSMUSG00000000530	0.345777	0.351257	0.475169	0.316555	0.305449	0.494867	0.0771808	0.0624122	0.12998
ENSMUSG00000000531	15.62	17.0591	17.8676	18.177	19.6377	16.6268	13.3981	15.1552	15.9746
ENSMUSG00000000532	3.60783	3.53054	3.4434	4.48081	4.43224	5.12715	5.27264	6.45335	5.99636
ENSMUSG00000000538	6.72586	8.0559	7.60809	7.58639	8.30116	9.0499	10.6235	12.7384	13.7745
ENSMUSG00000000544	11.6026	14.2304	12.8696	23.8696	23.849	24.1861	1.47502	1.44842	2.22612
ENSMUSG00000000552	8.99924	9.52229	8.53036	8.54854	7.54096	7.64477	7.67353	5.85706	9.23537
ENSMUSG00000000555	10.0184	11.6034	12.207	11.8412	12.6262	13.428	16.2452	19.585	18.5134
ENSMUSG00000000560	0	0	0.00587192	0	0	0	0	0	0
ENSMUSG00000000561	15.5726	14.8122	15.9268	12.572	15.9251	11.2377	11.6676	16.5495	18.8055
ENSMUSG00000000563	67.8736	56.5768	55.232	58.4068	49.4744	47.634	69.2417	58.711	47.0096
ENSMUSG00000000567	17.939	21.9874	20.8869	20.9883	24.0108	23.9297	13.0822	13.2486	19.6999
ENSMUSG00000000568	25.1081	23.4593	24.5192	20.4082	18.1096	18.9197	19.8852	18.372	17.5615
ENSMUSG00000000579	6.78727	6.57282	4.63397	7.0865	5.17742	4.88439	5.47256	4.14015	5.50929
ENSMUSG00000000581	10.5442	7.32611	4.08119	8.3055	6.98606	7.44794	6.59861	5.1191	1.78872
ENSMUSG00000000594	8.83468	8.39104	7.50738	13.4522	13.2906	12.454	11.4613	10.5217	14.445
ENSMUSG00000000600	1.24452	1.55254	1.45559	1.42999	1.55548	1.31736	1.26125	1.19553	1.35105
ENSMUSG00000000605	3.96414	3.96247	3.94371	4.18038	4.13347	4.36149	3.40519	1.786	2.48215
ENSMUSG00000000627	0.0100585	0.0493881	0.00818127	0.0803751	0.11335	0.0174084	0.0292902	0.0317078	0
ENSMUSG00000000628	38.8649	48.132	49.9349	36.7094	41.3528	43.6844	24.1353	32.4076	27.911
ENSMUSG00000000631	8.33747	13.5488	12.8493	10.3673	14.3644	14.8497	9.01306	14.6236	15.9765
ENSMUSG00000000632	0	0	0	0	0.0232664	0	0	0	0
ENSMUSG00000000673	0.0225362	0	0	0	0	0	0.0259033	0.109921	0.0192595
ENSMUSG00000000686	0.0389696	0.143117	0.140419	0.118858	0.0590692	0.0765577	0.173847	0.15376	0.147513
ENSMUSG00000000690	2.92454	3.76116	2.42342	2.64724	2.29089	2.35413	1.12316	1.34095	1.72315
ENSMUSG00000000693	0.00561861	0.263486	0.462888	0.345968	0.265342	0.217904	0.0269882	0.340933	0.0887787
ENSMUSG00000000706	0.440395	0.59275	0.41061	0.953763	0.926393	1.01975	0.704261	0.513258	0.783855
ENSMUSG00000000708	7.28254	7.04534	8.12198	8.21932	8.03214	7.89635	7.97962	8.01193	8.15035
ENSMUSG00000000711	43.3219	45.5435	41.7099	52.0145	50.4182	50.512	54.4958	52.7065	60.5106
ENSMUSG00000000724	0	0	0	0	0	0	0	0	0.0232656
ENSMUSG00000000730	0	0	0	0	0.029999	0	0	0	0
ENSMUSG00000000731	0	0	0	0	0	0	0	0	0.0117849
ENSMUSG00000000732	0.0114369	0.055702	0	0.0484678	0.0485058	0.0268834	0.0336565	0	0.0389252
ENSMUSG00000000738	10.7613	9.60879	9.78301	10.9104	12.144	10.7291	5.24712	5.67012	4.70516
ENSMUSG00000000739	0.011915	0	0	0	0.0202847	0	0	0	0
ENSMUSG00000000740	337.347	257.946	270.385	299.735	257.137	251.681	347.261	269.013	173.214
ENSMUSG00000000743	37.5898	36.2097	43.0062	36.7066	41.7204	40.5369	26.6786	32.5456	22.4058
ENSMUSG00000000751	43.8328	25.9543	41.2449	23.055	26.0646	24.5889	19.0735	19.8908	19.0207
ENSMUSG00000000753	0.145418	0.0184582	0.0451981	0.166621	0.0189995	0.109846	0.093029	0.0250904	0.0189751
ENSMUSG00000000759	3.72794	4.28959	3.77222	3.78808	4.13528	3.71756	2.51134	2.42453	2.66059
ENSMUSG00000000776	14.936	14.6257	12.578	11.1007	9.40304	10.8353	11.3818	11.1097	9.28332
ENSMUSG00000000782	31.1038	37.1275	33.2265	29.9176	33.3046	31.0487	19.1393	20.3769	26.8227
ENSMUSG00000000787	130.007	129.816	134.968	114.994	122.357	119.278	115.96	129.365	108.249
ENSMUSG00000000791	0.488955	0.586708	1.08339	0.437222	0.30964	0.356713	0.122155	0.423938	0.172444
ENSMUSG00000000792	0.316694	0.198863	0.382972	0.170452	0.21822	0.227475	0.143676	0.195278	0.113221
ENSMUSG00000000794	0	0	0	0	0.00851683	0	0.00991935	0.00813978	0.00431317
ENSMUSG00000000804	6.90904	8.56195	8.45764	7.62452	9.92641	8.79202	8.26924	10.7329	10.9529
ENSMUSG00000000805	0	0	0	0.0253723	0	0	0	0	0
ENSMUSG00000000811	3.81645	4.35836	3.12992	3.25454	3.37231	4.40288	6.8252	6.4609	5.22286
ENSMUSG00000000823	8.00817	9.37358	9.08871	7.46361	9.14638	9.12443	6.42218	8.34957	7.97785
ENSMUSG00000000826	13.7649	13.4145	14.2788	14.31	16.4469	16.1701	19.5515	22.2288	20.5364
ENSMUSG00000000827	10.8282	11.7525	8.33013	12.6496	10.0712	10.7906	13.3339	10.0972	11.8178
ENSMUSG00000000838	10.7361	12.105	10.834	9.25154	10.3728	9.87092	7.55516	8.1051	8.22742
ENSMUSG00000000869	0.160646	0.21468	0.239338	0.192603	0.246846	0.160494	0.25627	0.122565	0.228397
ENSMUSG00000000876	1.36026	1.64204	1.86955	1.98964	1.77081	1.81087	2.21913	1.96203	2.30577
ENSMUSG00000000881	2.55119	2.26476	2.36033	2.99951	2.95713	3.26308	3.23247	3.35121	3.09134
ENSMUSG00000000884	0.793175	0.824569	0.582075	0.602225	0.552357	0.922722	0.527308	0.589072	0.635753
ENSMUSG00000000901	2.88864	2.84238	2.73853	4.06815	3.69191	3.117	4.35618	5.80058	5.33814
ENSMUSG00000000902	4.90277	4.75009	4.83956	5.00806	4.54564	4.8106	5.06699	4.35762	4.71706
ENSMUSG00000000903	0	0	0	0	0	0	0.0575774	0	0
ENSMUSG00000000915	6.39316	8.62196	7.31816	8.74685	10.3063	9.56953	5.94782	8.03338	7.69859
ENSMUSG00000000916	6.46538	4.31457	5.4426	4.08769	4.03921	4.01564	3.36702	3.02423	3.9864
ENSMUSG00000000934	7.02743	7.01079	6.4755	4.87668	6.64249	5.60265	3.86031	5.45854	4.08751
ENSMUSG00000000938	6.83719	7.19381	8.34231	6.66683	6.11199	6.76811	7.0941	7.31189	7.21058
ENSMUSG00000000942	0.132594	0.027317	0.028143	0.065324	0	0	0.262795	0.133227	0.04309
ENSMUSG00000000957	27.4801	36.3058	37.4029	31.9923	41.1251	39.4802	32.0346	44.4166	44.4974
ENSMUSG00000000958	16.1882	14.0046	14.1543	16.2989	16.4499	16.207	13.4246	12.7823	15.7656
ENSMUSG00000000959	8.45149	7.80646	8.78089	7.48089	7.32029	6.77571	10.9954	10.1664	11.5042
ENSMUSG00000000976	5.42822	5.82885	6.71376	5.31621	5.52737	5.79637	3.91634	5.73234	6.1345
ENSMUSG00000000983	0.130084	0	0	0.213457	0	0	0.169939	0.0301373	0
ENSMUSG00000001014	0.175091	0.226938	0.680197	0.336446	0	0.18866	0.417316	0.626837	0.0201058
ENSMUSG00000001016	15.3801	13.8553	14.6133	13.6648	12.6468	13.1737	11.9261	10.523	10.248
ENSMUSG00000001017	21.2152	23.1124	23.8127	18.3942	21.4853	21.1077	26.9841	28.2238	21.2748
ENSMUSG00000001018	13.5967	19.6338	12.2974	14.7881	16.7207	19.087	12.2619	13.4839	8.78604
ENSMUSG00000001020	8.63038	3.3513	4.24106	9.47434	5.83568	6.26734	6.73392	3.00629	2.61648
ENSMUSG00000001021	0.438581	0.260935	0.395177	0.789212	1.29799	0.352439	0.306241	0.708543	1.02909
ENSMUSG00000001025	630.083	341.064	437.811	688.466	554.574	547.477	422.069	318.951	149.135
ENSMUSG00000001027	0.0261596	0.105612	0.0188447	0.0811101	0.100548	0.134909	0.014596	0.0181222	0.0557236
ENSMUSG00000001029	1.62427	1.79346	1.71121	1.67384	1.56785	1.27004	1.66909	1.30446	1.42203
ENSMUSG00000001034	5.99815	6.3492	7.12235	4.5135	5.90651	6.14865	4.56452	4.3062	6.30385
ENSMUSG00000001036	23.4346	14.4671	26.2354	31.4796	30.8222	29.6245	21.4306	25.1022	20.1961
ENSMUSG00000001039	3.62093	3.39313	3.29335	4.01435	3.55542	3.67835	1.83603	2.27781	1.63995
ENSMUSG00000001052	17.5679	21.3185	20.0048	17.6368	20.7095	20.9717	15.8113	18.4471	26.6676
ENSMUSG00000001053	12.2523	11.7962	11.8586	18.125	19.5225	18.6768	8.17555	8.89985	8.68893
ENSMUSG00000001054	13.7061	15.5637	13.7763	12.5396	12.3969	13.2444	9.11876	11.7937	9.10049
ENSMUSG00000001056	183.229	150.798	152.197	153.082	130.596	121.036	129.772	105.1	95.7906
ENSMUSG00000001062	1.88205	1.87536	1.81278	1.83444	2.21366	1.921	2.09031	2.03306	2.20971
ENSMUSG00000001065	2.19875	2.73422	3.27647	2.07666	2.31972	2.77927	2.03007	2.63316	3.01381
ENSMUSG00000001076	0	0	0.228257	0.068538	0	0	0	0.115421	0.038815
ENSMUSG00000001082	7.56116	8.8254	8.53878	8.51272	7.44145	8.31304	7.53977	7.65697	8.24024
ENSMUSG00000001089	12.5764	15.3243	15.566	12.8358	7.72855	16.2256	4.20189	16.7109	18.7393
ENSMUSG00000001095	0	0.225059	0	0	0	0	0	0	0
ENSMUSG00000001098	40.4597	38.0807	42.9016	41.0645	42.1821	44.2153	34.0271	40.0168	31.4271
ENSMUSG00000001100	27.5937	26.3484	25.747	26.1651	25.9425	25.497	18.0093	17.3298	18.3276
ENSMUSG00000001105	12.5373	10.729	10.8974	9.1859	7.82598	8.43223	13.0186	12.4591	8.56726
ENSMUSG00000001119	1.03746	1.00447	0.828648	1.14677	0.99768	1.43631	0.380008	0.620269	0.340639
ENSMUSG00000001120	0.784518	0.793563	0.836354	0.588428	0.683831	0.383729	0	0	0
ENSMUSG00000001123	126.83	99.2488	103.624	88.9315	69.6364	70.5229	58.7812	48.932	52.4355
ENSMUSG00000001127	7.36019	7.3438	8.05857	6.40093	6.88783	7.02879	5.78833	6.71977	6.84184
ENSMUSG00000001128	0.367596	0.427212	0.285304	0.45816	0.603024	0.684645	0.344528	0.372437	0.65247
ENSMUSG00000001131	77.8544	75.8003	64.6613	86.4122	68.5109	70.9107	66.9754	51.0357	85.0338
ENSMUSG00000001134	4.33591	3.21813	4.51205	3.02769	4.22968	2.64608	3.68775	3.49303	1.94657
ENSMUSG00000001138	3.25756	3.92563	3.93029	3.16027	4.41815	3.91118	3.98537	4.82314	5.00853
ENSMUSG00000001143	2.30375	2.14797	2.59029	2.72796	2.61671	3.12599	2.4866	2.94611	2.74725
ENSMUSG00000001150	7.83968	11.0532	11.499	8.31563	10.5221	9.95278	5.21732	8.23929	7.7662
ENSMUSG00000001151	3.66943	5.92197	5.27791	4.04119	5.50483	6.19169	3.16975	5.08983	5.37441
ENSMUSG00000001155	0.0163785	0	0	0.030565	0	0.0145791	0.0803322	0	0
ENSMUSG00000001156	0.525927	0.591585	0.588755	1.08505	0.9848	1.29278	0.939869	0.990102	0.961888
ENSMUSG00000001157	5.21156	4.1747	5.08156	4.83398	4.63199	5.14495	6.45311	6.16561	3.81004
ENSMUSG00000001158	15.7803	15.346	13.0548	13.9906	11.3193	11.3493	22.492	15.1946	21.3038
ENSMUSG00000001166	4.06712	3.23166	2.38888	2.51245	1.85786	1.89934	1.87864	1.44601	0.927361
ENSMUSG00000001168	0	0.222021	0	0.021721	0	0.1659	0	0.019647	0
ENSMUSG00000001173	2.48261	2.81554	2.69314	3.17433	2.89837	3.04914	2.90334	2.9854	3.29851
ENSMUSG00000001175	95.9041	83.3608	85.1668	91.3498	85.7364	83.075	59.3401	55.6564	51.7018
ENSMUSG00000001211	9.90332	14.8549	11.1734	9.45795	10.866	13.0966	6.0995	5.72448	6.16021
ENSMUSG00000001225	0	0	0.0421123	0	0	0	0	0	0
ENSMUSG00000001227	4.44198	4.66551	5.58975	4.19855	5.15395	6.0834	2.73045	3.5743	3.83755
ENSMUSG00000001228	43.3581	56.3068	57.0251	43.2035	60.3484	61.5881	24.154	32.0336	29.5964
ENSMUSG00000001229	9.75738	11.3602	11.1454	9.28195	10.3228	10.5754	6.47849	8.54703	9.43274
ENSMUSG00000001240	0	0.0129123	0	0	0	1.20221	0	0	0
ENSMUSG00000001247	89.3101	100.328	94.3184	86.313	92.5157	93.2755	45.2587	48.6641	60.1242
ENSMUSG00000001248	4.47197	4.20033	4.289	6.693	6.09419	7.0012	4.37352	5.50501	5.16397
ENSMUSG00000001249	2.24754	2.01977	2.21343	2.83645	3.38907	3.02908	0.0759275	0.187225	0.0438085
ENSMUSG00000001270	0	0	0.0138263	0	0.0154816	0	0	0	0.0311417
ENSMUSG00000001280	16.3723	18.9777	18.9125	17.9851	19.13	19.7333	23.9564	28.8212	25.0522
ENSMUSG00000001281	1.17776	1.2223	1.14615	0.766078	0.964813	0.719702	2.85743	3.3186	2.66946
ENSMUSG00000001285	8.51859	9.735	9.05968	8.38125	8.53033	8.28383	7.71952	7.38267	7.76231
ENSMUSG00000001288	18.1152	22.7594	21.766	19.0632	21.0103	21.3672	19.1321	21.8392	27.546
ENSMUSG00000001289	41.514	29.8029	29.7497	40.5013	27.222	28.4149	37.2878	28.5449	26.8006
ENSMUSG00000001300	0.0840827	0.063297	0.085028	0.0637794	0.0196146	0.0407318	0.0149894	0.0364848	0.0588354
ENSMUSG00000001305	37.9757	29.4427	28.8556	26.1764	21.5908	19.6649	24.6632	19.0596	19.9355
ENSMUSG00000001313	3.10118	4.29565	3.26418	3.83815	4.84141	3.94429	1.84055	1.22658	0.69574
ENSMUSG00000001323	2.73304	1.88225	1.37633	1.62281	1.12487	1.13091	2.87465	2.86313	3.23536
ENSMUSG00000001333	0	0	0	0.0238324	0.0469802	0.0487802	0.123656	0.0317041	0.028284
ENSMUSG00000001334	0	0.031353	0.032472	0	0.129769	0.075792	0	0.028966	0.113513
ENSMUSG00000001348	24.449	17.6859	17.548	17.2193	22.4907	19.7915	20.2351	20.0443	18.5639
ENSMUSG00000001349	0	0	0	0	0.0975949	0	0	0.010309	0.032603
ENSMUSG00000001366	5.05121	5.39646	4.51703	3.6003	3.52761	3.62368	3.64665	2.98235	3.07004
ENSMUSG00000001376	5.9984	5.01383	5.79828	5.5589	5.91241	5.33912	3.99572	4.0293	3.49436
ENSMUSG00000001380	63.6866	59.9503	64.2669	60.2095	57.773	56.488	39.8552	39.23	33.1614
ENSMUSG00000001383	36.458	32.8433	30.8221	32.3962	25.8467	27.0522	27.2895	20.6036	22.9828
ENSMUSG00000001403	96.5729	91.3079	83.5111	80.7243	71.9927	71.524	73.1614	60.5466	87.2287
ENSMUSG00000001415	18.2507	22.5871	22.4548	18.4206	19.3606	20.884	18.2415	23.3405	25.1693
ENSMUSG00000001416	69.1729	58.7622	61.6835	61.47	56.6342	58.1434	37.5163	36.0824	26.3787
ENSMUSG00000001418	19.3522	19.1731	19.7206	16.8917	19.9535	20.6115	11.0823	10.7942	14.9388
ENSMUSG00000001419	8.80349	8.83778	10.0702	10.7649	12.183	13.7877	16.3277	17.3672	28.0825
ENSMUSG00000001420	4.74257	5.17693	5.06777	4.57842	4.65651	4.65389	2.63477	3.0073	3.68238
ENSMUSG00000001424	18.2369	20.6987	20.6206	19.0235	23.1514	21.8914	31.7878	38.4507	31.5357
ENSMUSG00000001435	1.87186	2.59755	2.19897	2.63299	3.10315	3.61113	2.54565	3.18918	3.13812
ENSMUSG00000001436	5.26964	6.33307	5.6376	4.53146	5.07934	5.15622	5.3423	6.52545	6.38906
ENSMUSG00000001440	122.015	117.887	119.47	113.435	114.732	120.277	113.521	122.165	108.312
ENSMUSG00000001441	14.1889	11.718	12.7027	10.6204	11.9488	11.8952	15.9879	16.7511	18.0627
ENSMUSG00000001444	0	0.017501	0	0	0	0	0	0	0.036236
ENSMUSG00000001445	37.6197	34.7805	36.2131	36.5989	32.8841	34.9162	41.0795	38.0265	42.7697
ENSMUSG00000001467	22.1795	22.248	22.5746	16.3009	15.5869	15.8322	7.76875	7.48609	7.21892
ENSMUSG00000001472	35.5931	36.9678	35.9895	34.6608	37.2561	37.5161	31.4364	35.4533	36.0441
ENSMUSG00000001473	116.906	116.038	115.465	96.8954	98.7333	94.5514	100.288	102.562	106.949
ENSMUSG00000001482	12.0137	11.864	12.9305	10.007	11.8412	10.8766	4.52349	5.33757	3.83911
ENSMUSG00000001493	0.023632	0.058631	0	0	0	0	0	0	0.020232
ENSMUSG00000001497	0.020754	0.00849078	0.0088415	0	0.0442293	0	0.0205029	0	0.106988
ENSMUSG00000001504	0	0	0	0.0313475	0	0	0.0472668	0	0
ENSMUSG00000001506	0.0396884	0.0179183	0.0136707	0.081287	0.0772491	0.180338	0	0.0962063	0.0137367
ENSMUSG00000001507	115.398	145.685	146.566	118.903	153.383	151.548	87.6508	119.549	128.503
ENSMUSG00000001508	0	0	0.0247491	0.0561386	0	0.0268219	0	0	0
ENSMUSG00000001510	1.77523	2.13252	1.54874	2.53134	2.38657	3.37933	1.0433	1.8862	1.60519
ENSMUSG00000001517	21.9278	32.567	23.2149	20.3507	27.5726	28.1616	14.6133	15.1765	18.9539
ENSMUSG00000001518	2.75973	3.04438	2.77834	3.24909	3.44734	4.23331	4.17952	4.71836	4.21766
ENSMUSG00000001520	0.493061	0.110159	0.471918	0.322023	0.485578	0.329837	0.891638	1.14903	1.2494
ENSMUSG00000001521	4.87102	4.83606	5.92793	4.1638	4.84707	5.02166	4.47718	4.13346	4.23333
ENSMUSG00000001524	5.33437	5.27718	4.75263	3.88262	4.13375	3.33082	2.83602	3.46296	2.39583
ENSMUSG00000001525	287.826	296.941	300.187	256.38	258.836	269.633	285.074	275.395	263.272
ENSMUSG00000001542	3.25769	3.67714	3.76116	3.62041	3.78438	4.2089	3.48428	3.75032	4.74037
ENSMUSG00000001552	42.7685	43.35	47.9457	45.9561	50.8985	39.4536	24.4967	34.7099	47.4164
ENSMUSG00000001555	0.0540087	0.00779338	0.0152848	0	0	0	0.0296316	0.0855214	0.107874
ENSMUSG00000001558	0.12852	0.139956	0.0518969	0.0958229	0.189076	0.267817	0.0648884	0	0.104298
ENSMUSG00000001566	0	0	0	0	0	0	0.0179171	0	0.0385172
ENSMUSG00000001569	5.534	5.91063	5.24592	4.4974	4.43489	4.43579	3.6087	3.84167	3.19666
ENSMUSG00000001576	18.6358	19.6373	18.3092	21.3479	22.9403	22.3806	22.2334	22.709	27.9952
ENSMUSG00000001583	0.0183779	0.0118497	0.0883578	0	0	0	0.0182886	0	0.0364801
ENSMUSG00000001588	0.438196	0.156838	0.424464	0.334556	0.158815	0.417153	0.56283	0.830728	0.67888
ENSMUSG00000001604	0.0377418	0.0311025	0	0.235901	0.0305485	0.03324	0.232197	0.627796	0.272323
ENSMUSG00000001622	9.4813	8.81143	6.98218	10.6997	7.59098	8.07243	31.3007	20.2056	34.7402
ENSMUSG00000001627	23.8681	19.2902	20.6171	25.397	21.5649	21.5351	28.6827	24.5694	26.7444
ENSMUSG00000001630	9.35513	10.0901	8.99979	11.4954	10.676	10.9349	13.0954	12.1257	8.99267
ENSMUSG00000001632	7.3216	8.75502	8.18491	7.85454	8.82547	9.27536	8.27474	11.0848	10.563
ENSMUSG00000001642	20.3278	15.5411	16.729	16.3681	13.9098	15.5819	19.5613	15.6692	12.6869
ENSMUSG00000001655	0.021244	0	0	0.021163	0	0	0	0	0
ENSMUSG00000001657	0.0186577	0	0	0	0	0	0	0	0
ENSMUSG00000001661	0	0	0	0	0.0160976	0	0	0	0
ENSMUSG00000001663	0.648742	0.422038	0.338052	0.368586	0.11206	0.723641	1.23358	1.01169	1.26459
ENSMUSG00000001665	0.0108958	0	0	0.0264447	0	0	0	0	0
ENSMUSG00000001666	12.5774	7.36483	9.041	9.11031	9.30077	7.92736	10.1384	8.19533	5.79559
ENSMUSG00000001670	3.13406	3.1039	2.71734	1.52601	0.995306	0.5816	0.688057	0.1875	0.307283
ENSMUSG00000001672	0.072907	0.0725777	0.114161	0.0323058	0.109181	0.0615729	0.0453783	0.0403566	0.101121
ENSMUSG00000001674	89.109	79.7338	84.3995	67.0754	61.2542	67.4426	74.7807	73.2298	67.976
ENSMUSG00000001687	10.4494	9.37096	10.0172	10.4214	10.1021	11.2126	15.3305	14.2744	10.4922
ENSMUSG00000001700	2.37506	2.10059	1.90879	1.64054	1.49812	1.12059	0.840482	1.10385	0.935204
ENSMUSG00000001707	25.6517	20.177	21.5543	24.4624	16.727	18.3801	24.7977	20.8617	18.382
ENSMUSG00000001729	88.0005	88.8303	88.6783	80.535	84.186	86.7067	34.2202	35.2336	36.099
ENSMUSG00000001739	0.511751	0.580503	0.500595	0.247454	0.161805	0.42626	0.19099	0.0913984	0.474614
ENSMUSG00000001741	0	0.0821198	0.0461522	0.0198435	0.0256031	0.171422	0.0177069	0.115129	0.0227034
ENSMUSG00000001750	8.79347	11.3023	10.2353	8.10949	8.81654	9.63823	7.40878	8.66601	9.21875
ENSMUSG00000001751	2.20145	2.27832	2.54551	3.54462	2.99299	3.27788	2.98284	3.96715	2.95901
ENSMUSG00000001755	8.89685	8.98052	8.46955	8.56732	9.60932	9.27392	5.555	6.51633	5.83707
ENSMUSG00000001761	20.9943	22.3504	21.8117	19.864	22.0256	21.5977	12.0922	13.3985	12.8495
ENSMUSG00000001763	0.100994	0.200042	0.17131	0.148798	0.0528266	0.0544057	0.477313	0.325655	0.602065
ENSMUSG00000001767	17.6848	17.4737	16.927	16.2134	14.8099	14.8802	10.4546	9.81408	9.87329
ENSMUSG00000001768	7.59647	7.18061	7.52056	8.84381	8.88295	9.42336	2.89769	3.05885	2.45721
ENSMUSG00000001774	15.9699	13.3667	15.5303	15.2565	14.2752	13.0503	12.3869	12.6494	9.21825
ENSMUSG00000001783	77.622	65.7913	64.7896	78.8429	69.7376	66.5532	73.7708	69.0328	59.2794
ENSMUSG00000001785	26.101	21.6741	23.9837	19.5936	17.5121	18.4555	18.5227	16.8181	13.6912
ENSMUSG00000001786	1.93892	1.72853	2.0727	2.06062	1.93438	2.02691	2.53265	2.08536	2.17351
ENSMUSG00000001794	100.296	89.3913	89.1115	111.624	97.2804	97.1885	110.474	91.9812	96.3884
ENSMUSG00000001802	5.29402	5.65381	6.308	4.64587	5.30383	5.79485	5.19357	7.61406	8.64619
ENSMUSG00000001804	0.12142	0.24159	0.294666	0.179424	0.319513	0.201326	0.10571	0.088946	0.150385
ENSMUSG00000001819	0.06384	0	0	0	0	0	0	0	0
ENSMUSG00000001827	0.06901	0.0397381	0	0.0216917	0	0.0387578	0.0900208	0.220505	0.0775304
ENSMUSG00000001829	4.34391	4.68597	4.55021	3.87595	4.15653	3.99438	3.08245	3.83041	3.18625
ENSMUSG00000001833	18.987	18.6389	18.349	17.0429	22.209	15.5435	14.7927	13.3472	17.852
ENSMUSG00000001844	6.64813	7.32084	6.23194	6.61995	5.86513	6.39067	4.63996	4.19725	5.84509
ENSMUSG00000001847	142.034	122.888	118.185	143.348	127.104	126.4	153.069	124.788	145.906
ENSMUSG00000001855	7.78391	10.5287	10.7109	7.36084	9.82353	10.5158	5.67191	9.48898	12.0358
ENSMUSG00000001864	8.64911	7.00098	7.62475	9.83631	8.83758	8.11961	7.3955	7.27182	7.02684
ENSMUSG00000001870	0.00952135	0.0770194	0.010106	0.0146149	0.0293378	0.0579562	0.027245	0.0119349	0.0421425
ENSMUSG00000001891	166.073	130.415	148.784	189.169	146.573	156.833	121.944	114.58	76.0176
ENSMUSG00000001901	0	0.0622658	0	0	0	0	0	0	0
ENSMUSG00000001909	12.9346	10.1777	10.4996	8.1551	11.7793	8.99436	7.77165	9.45562	9.49106
ENSMUSG00000001910	37.3982	50.4743	45.5474	33.5061	43.5876	42.7572	28.5057	34.285	41.6384
ENSMUSG00000001911	8.10643	12.5468	14.9599	6.40091	12.0131	4.39214	5.89591	7.24033	5.81792
ENSMUSG00000001918	34.1399	33.6372	34.159	33.9262	34.432	37.75	60.7566	64.393	58.4901
ENSMUSG00000001924	101.253	105.694	103.7	95.8332	103.041	101.721	84.0738	91.867	91.8191
ENSMUSG00000001930	0.0864596	0.160406	0.110792	0.105353	0.187398	0.107916	0.183031	0.337029	0.265667
ENSMUSG00000001942	2.23165	2.01758	2.25489	2.34854	2.07674	2.43129	1.75376	1.65338	1.87307
ENSMUSG00000001943	0.261555	0.199239	0.319498	0.29609	0.249066	0.255348	0.381274	0.596713	0.328756
ENSMUSG00000001946	13.154	13.1383	13.4535	15.9177	16.0096	15.867	21.8123	20.9258	15.1915
ENSMUSG00000001948	1.00548	1.24012	0.68111	1.55671	0.946284	1.11814	1.30472	0.899569	1.24465
ENSMUSG00000001962	29.9674	23.5792	23.196	24.7066	18.6459	17.946	18.5035	13.466	13.9676
ENSMUSG00000001964	36.0434	34.0512	31.7754	32.2266	28.0043	27.9725	34.0373	28.3068	37.6777
ENSMUSG00000001983	6.5961	5.14888	6.96443	6.61164	6.63728	5.9144	7.03398	8.44212	5.55668
ENSMUSG00000001985	0.012814	0.004836	0	0.014511	0.014985	0	0	0	0
ENSMUSG00000001986	1.20855	2.34635	1.77838	1.41498	2.31218	1.91561	2.22076	1.60662	2.65212
ENSMUSG00000001988	0.159615	0.304571	0.228622	0.19544	0.148342	0.223327	0.116064	0.211809	0.177701
ENSMUSG00000001995	0.642598	0.948392	1.03018	0.837125	1.17974	0.982884	0.791664	0.911178	1.00063
ENSMUSG00000001998	1.65279	2.35562	2.36012	1.80288	1.81137	2.58953	1.6212	3.15235	2.37697
ENSMUSG00000001999	9.26196	7.82839	8.35841	8.17157	8.24732	6.98597	7.30987	6.09407	5.39438
ENSMUSG00000002006	0.036626	0.238206	0.15304	0.103526	0.155095	0.111195	0.133982	0.287946	0.190032
ENSMUSG00000002007	0	0	0	0.0187082	0.0732554	0.0120632	0.0186177	0.0332	0.178568
ENSMUSG00000002010	27.3557	26.9127	24.7817	26.3789	25.1788	25.2839	23.1843	20.2209	22.8011
ENSMUSG00000002012	0	0.0662762	0	0	0	0	0.0208338	0.0420679	0
ENSMUSG00000002014	21.7451	16.6676	18.809	18.9812	17.7394	17.5106	23.3688	23.066	22.0953
ENSMUSG00000002015	244.584	169.596	181.58	251.856	193.223	200.701	180.119	140.187	103.971
ENSMUSG00000002017	23.8205	20.7251	22.4553	17.5564	15.9768	17.1109	16.2905	16.6281	14.5768
ENSMUSG00000002020	0.0379425	0.0250463	0.0164444	0.0378928	0.087198	0.0227048	0.0190887	0.0103942	0.00550767
ENSMUSG00000002028	6.21949	11.5706	12.2212	7.95893	13.5207	13.6145	7.03559	11.6272	14.965
ENSMUSG00000002031	4.34399	3.57217	3.54878	4.51555	4.98441	4.62712	5.15615	5.54423	6.56389
ENSMUSG00000002032	0	0.0948955	0.069586	0.1028	0.111628	0	0.117441	0.120624	0.0334054
ENSMUSG00000002043	4.23318	4.67799	4.06188	6.52683	5.64851	5.92403	10.3011	10.3998	8.5901
ENSMUSG00000002052	27.6132	36.2185	34.4998	28.6136	33.1072	34.4932	24.0827	30.6026	35.9171
ENSMUSG00000002055	11.79	13.1969	13.5902	10.1645	10.9792	11.2826	7.82897	7.23492	6.89671
ENSMUSG00000002057	0	0	0	0.016205	0	0	0.016127	0	0
ENSMUSG00000002058	2.90322	2.28278	3.94565	2.40611	3.79071	2.62761	2.48461	2.62666	1.95144
ENSMUSG00000002059	14.8215	11.7592	10.1917	15.3293	13.8468	13.8846	15.8454	12.8619	10.7799
ENSMUSG00000002064	25.1166	22.3969	23.4364	19.5792	23.8303	24.9243	28.0911	29.8968	25.1154
ENSMUSG00000002068	29.8969	22.6713	23.0422	18.8763	15.594	16.9657	14.7961	12.3235	12.1591
ENSMUSG00000002076	0.618562	0.385728	0.42256	0.495847	0.494156	0.398499	0.314757	1.29652	0.569696
ENSMUSG00000002083	4.42318	4.9373	4.86339	6.0767	7.1822	6.55746	7.12006	9.37979	5.86566
ENSMUSG00000002100	0	0.071781	0.260595	0	0.306756	0.552159	0	0.065199	0.458383
ENSMUSG00000002102	55.613	48.4753	51.4909	45.7398	43.3667	49.762	34.9489	31.5913	27.745
ENSMUSG00000002103	6.46076	5.9502	7.22845	6.1185	7.5638	7.77111	5.80075	6.35795	9.75216
ENSMUSG00000002104	0.0828558	0.159217	0.229444	0.211162	0.331553	0.205052	0.0429422	0.0269295	0
ENSMUSG00000002105	5.29388	5.61128	6.811	5.53927	5.88406	6.21879	4.62666	4.56837	6.35811
ENSMUSG00000002107	0.00709431	0.012611	0	0.0140853	0.0291311	0.00163339	0	0.00327498	0
ENSMUSG00000002108	4.12635	3.3005	3.80005	2.47641	2.71873	2.74863	0.680498	0.749759	0.696176
ENSMUSG00000002109	4.92023	6.34426	5.26696	6.30274	5.72003	5.51015	6.11035	5.09643	6.35257
ENSMUSG00000002111	0.0686217	0.0921071	0.168406	0.0346942	0.04913	0.0577613	0.084108	0.0354841	0.0334527
ENSMUSG00000002129	24.5846	23.9892	23.1761	20.2534	19.8196	21.3588	18.291	18.4706	21.28
ENSMUSG00000002147	31.1159	36.3923	32.9136	36.4773	37.9848	38.779	37.1732	39.706	45.9221
ENSMUSG00000002204	0.196893	0.143984	0.072506	0.376757	0.244136	0.173223	3.014	3.03154	2.8988
ENSMUSG00000002205	3.0162	3.318	3.35509	3.5558	3.37892	3.32242	2.9839	3.52285	3.18844
ENSMUSG00000002210	5.9558	8.44746	6.25277	6.39951	5.92125	6.54633	7.02094	7.61731	8.63033
ENSMUSG00000002221	3.10693	3.65387	3.91203	2.97158	2.92415	3.23363	2.49305	3.17876	3.22842
ENSMUSG00000002222	9.20349	8.68367	8.83805	12.1673	11.3842	11.9864	14.311	9.15316	11.9533
ENSMUSG00000002227	9.16955	10.5359	9.63442	8.08759	10.0388	9.47827	8.14443	8.50741	11.0304
ENSMUSG00000002228	0.943763	0.857415	0.789589	1.47424	1.83531	1.25247	0.556671	1.12572	0.884605
ENSMUSG00000002233	114.375	124.095	116.843	85.1035	129.191	123.178	122.363	114.856	127.316
ENSMUSG00000002249	1.64912	1.88395	0.993745	2.05496	1.31461	2.23504	1.86182	2.53553	3.06581
ENSMUSG00000002250	3.14268	2.04567	1.95493	1.77768	2.12068	2.30618	1.71738	2.33013	2.95412
ENSMUSG00000002257	1.72543	2.12104	1.69773	1.96154	3.11332	1.9759	0.0677561	0	0.015789
ENSMUSG00000002265	0	0.00639598	0	0	0	0.00341793	0	0.00312359	0
ENSMUSG00000002274	1.40217	2.04833	1.2147	1.22948	2.05758	2.12739	2.66651	3.73487	2.49114
ENSMUSG00000002279	0.916252	1.03251	0.892903	0.904687	0.938789	0.969766	1.24176	1.38226	1.62303
ENSMUSG00000002280	3.43609	3.54476	3.46561	3.24544	3.69191	3.42956	2.60381	2.42797	2.91627
ENSMUSG00000002289	3.15202	4.67009	4.86973	2.91755	4.35444	3.55962	6.56401	5.19832	7.33995
ENSMUSG00000002297	7.28983	7.19314	7.09373	7.15339	6.51038	5.94785	7.17394	6.69706	6.95393
ENSMUSG00000002307	5.94825	7.83994	5.99669	6.44151	6.87776	5.48577	7.19989	5.77242	5.05133
ENSMUSG00000002308	6.08143	4.54744	5.38842	4.69203	4.04168	3.7253	2.85567	2.20077	1.72237
ENSMUSG00000002319	15.5643	17.1517	13.4272	11.5447	16.9533	16.1995	10.8372	12.4252	12.6252
ENSMUSG00000002320	8.81638	9.3684	10.711	8.40548	11.6562	9.01271	7.08744	9.385	5.14647
ENSMUSG00000002324	0	0.00649098	0	0	0	0	0	0	0
ENSMUSG00000002325	2.00365	1.88438	2.09185	2.18829	2.15704	1.88452	2.174	2.03158	2.61096
ENSMUSG00000002326	4.78516	4.02951	5.32319	4.04242	3.69838	3.58708	3.13718	3.04431	1.89271
ENSMUSG00000002329	9.56133	7.42869	8.4183	9.60974	8.82153	8.1992	10.3677	8.98347	8.25431
ENSMUSG00000002332	5.36435	5.3728	5.58856	5.22839	5.18858	5.49202	5.10746	5.79204	4.27631
ENSMUSG00000002341	0	0	0	0	0.031146	0	0	0	0
ENSMUSG00000002342	9.47123	9.22443	5.63224	10.7483	5.71452	10.4959	9.38831	10.9177	10.1747
ENSMUSG00000002343	7.05073	6.26627	5.56707	4.15333	3.7406	4.06246	2.35121	2.72312	1.84493
ENSMUSG00000002345	12.0345	15.6153	14.5937	14.4609	15.2114	13.4382	10.6488	9.56475	13.1057
ENSMUSG00000002346	0.654945	0.557258	0.454174	0.323569	0.337774	0.382921	0.263	0.348039	0.308893
ENSMUSG00000002365	26.4781	28.7502	26.964	29.1962	32.0168	31.9042	28.1809	30.5692	27.9628
ENSMUSG00000002372	11.5717	14.4182	13.2614	10.6431	12.4686	10.8935	10.637	12.5057	11.2521
ENSMUSG00000002379	26.0122	25.208	24.9629	24.4525	23.4074	28.4728	23.832	16.8872	24.7333
ENSMUSG00000002384	12.3782	12.7592	13.3385	11.8816	13.3083	12.1306	12.2637	13.1399	13.1163
ENSMUSG00000002393	10.629	9.38113	11.4555	10.8409	9.06005	11.7077	7.57521	7.53407	4.80983
ENSMUSG00000002395	9.48534	10.0897	7.4907	10.6317	11.1867	10.9411	12.675	12.5738	9.09526
ENSMUSG00000002396	4.10421	4.2033	4.51132	3.49316	3.77041	4.04777	2.82095	2.88712	3.29125
ENSMUSG00000002409	1.56915	1.43598	1.44168	2.46882	2.28832	2.33695	1.48539	1.84788	2.77121
ENSMUSG00000002413	1.93792	2.49022	2.49957	2.43589	2.45673	2.5328	2.75249	3.18826	3.6483
ENSMUSG00000002416	3.58333	1.88785	2.77443	3.05903	4.01808	2.83269	3.58925	2.70945	1.37557
ENSMUSG00000002428	2.74102	3.66672	2.91261	2.98187	4.11488	2.95486	1.26717	2.10073	2.09485
ENSMUSG00000002455	30.0225	33.4995	33.2123	31.7502	30.7581	29.6506	28.9699	33.3495	31.0729
ENSMUSG00000002458	0	0	0	0	0	0	0	0.0190732	0
ENSMUSG00000002475	0.209558	0.166986	0.0384406	0.189286	0.180126	0.158874	0	0.0716735	0
ENSMUSG00000002477	49.6567	42.9537	37.952	40.2178	30.2575	27.6404	41.5589	30.371	36.7774
ENSMUSG00000002486	1.88415	2.42901	2.36405	2.10212	2.68673	1.65336	1.93687	2.15216	2.35461
ENSMUSG00000002489	1.92872	2.03817	2.36357	4.54882	5.22962	4.51699	0.35286	0.362579	0.245385
ENSMUSG00000002496	5.40469	6.3731	7.02065	5.56282	7.01192	6.88553	4.27528	5.63357	5.47672
ENSMUSG00000002500	0.0577517	0.0530049	0.105905	0	0.0771013	0.0542543	0.0456102	0	0
ENSMUSG00000002504	6.62703	6.19918	5.40558	4.61467	7.80153	7.95683	8.60241	8.37371	10.6482
ENSMUSG00000002524	21.858	18.2155	20.8459	20.7273	21.198	18.6035	19.0794	17.86	16.4734
ENSMUSG00000002546	10.0643	12.1619	12.4986	11.2528	13.3744	11.972	12.072	14.7974	16.401
ENSMUSG00000002550	17.2743	16.7653	17.0268	15.8674	14.4899	15.8023	24.2673	21.4449	21.717
ENSMUSG00000002565	0.408297	0.22206	0.608762	1.51719	1.67433	1.10427	0	0	0
ENSMUSG00000002578	1.32836	1.27558	0.979627	0.761522	1.10777	0.666453	0.269709	0.243145	0.367979
ENSMUSG00000002580	41.1631	29.5052	31.7692	30.5414	20.0014	25.0099	20.2503	16.3642	11.3577
ENSMUSG00000002588	0.144836	0	0	0.157953	0	0	0.0536556	0	0
ENSMUSG00000002602	33.0924	36.8864	38.3079	38.0941	40.1539	42.1318	27.0127	29.0081	33.3161
ENSMUSG00000002603	18.786	17.9896	15.4192	23.0006	20.757	20.2168	12.9629	11.4341	17.5334
ENSMUSG00000002608	8.51229	9.64108	9.19128	8.49117	9.15889	9.96302	8.53749	10.1517	13.8063
ENSMUSG00000002617	0.809129	1.02503	0.673565	0.45443	0.522418	0.368748	1.54158	1.2394	1.16866
ENSMUSG00000002625	2.30298	2.29677	2.79867	2.35014	2.96277	2.33995	4.70716	4.84266	5.5249
ENSMUSG00000002635	6.67838	5.24559	4.46954	5.32876	4.38451	7.279	8.45939	7.25044	3.89016
ENSMUSG00000002658	55.8538	54.9098	56.3077	43.94	43.3657	47.8109	43.2046	44.2639	48.4103
ENSMUSG00000002660	37.5404	34.3131	34.7023	30.4983	31.9687	34.4647	26.4001	24.1877	23.1736
ENSMUSG00000002661	5.53967	3.79953	3.55582	4.49481	4.1967	3.64102	4.84978	3.76883	2.64446
ENSMUSG00000002664	0.103511	0	0.273452	0.419222	0.274209	0.145199	0.175286	0.491163	0.299191
ENSMUSG00000002668	0.31591	0.37147	0.584373	0.377953	0.442883	0.404113	0.364502	0.291003	0.422983
ENSMUSG00000002679	25.6581	21.4466	20.0963	13.4537	17.463	10.1463	14.2343	9.28973	5.87849
ENSMUSG00000002688	0	0	0	0	0	0.07639	0	0	0
ENSMUSG00000002699	0	0	0.050303	0.00708369	0	0	0.00970068	0	0.0397963
ENSMUSG00000002718	56.1812	56.9791	53.2246	50.4548	46.7962	50.8446	37.5706	40.5991	37.391
ENSMUSG00000002728	27.6192	21.1218	21.4904	22.8841	19.3193	18.8639	22.8497	16.812	15.8258
ENSMUSG00000002731	11.6268	9.91994	10.4322	10.1294	9.92282	8.47859	12.5171	10.1265	8.2907
ENSMUSG00000002732	2.27596	0.819139	1.5847	2.11746	1.80563	2.40179	2.41014	1.70498	1.36479
ENSMUSG00000002733	17.0685	17.7826	15.2623	15.0759	15.1388	15.3524	14.696	11.2384	16.8076
ENSMUSG00000002741	52.4044	41.7459	46.3091	50.48	43.6622	46.5612	56.3308	50.9091	41.8337
ENSMUSG00000002748	25.2041	31.0224	31.8638	26.2965	31.275	31.4546	16.9106	22.4594	21.0607
ENSMUSG00000002763	2.44893	2.8174	3.04049	3.02144	3.54271	3.32245	2.39921	3.15818	1.66903
ENSMUSG00000002767	19.5921	18.7066	18.6719	20.5313	20.5038	19.0647	24.1298	21.3851	19.057
ENSMUSG00000002768	26.609	25.0389	27.7254	29.2766	25.3269	25.8813	32.2163	28.1138	28.35
ENSMUSG00000002769	1.24864	1.03003	1.24329	1.04462	0.59093	0.28564	1.40655	0.539331	0.243086
ENSMUSG00000002771	0.229334	0.166777	0.242219	0.178733	0.212338	0.208749	0.170185	0.137651	0.160344
ENSMUSG00000002778	46.1694	39.0484	38.835	44.6214	46.9079	51.1303	39.0113	35.6145	36.3733
ENSMUSG00000002781	1.33789	1.37457	1.43097	1.45747	1.59066	1.67792	1.52653	1.57823	1.80644
ENSMUSG00000002791	0.0666897	0.0418819	0.0575363	0.0494493	0.0126027	0.081419	0.196785	0.207667	0
ENSMUSG00000002797	0.828301	0.558954	0.64777	0.962956	1.02805	0.878864	0.558102	0.515825	0.646926
ENSMUSG00000002799	0.257193	0.369769	0.302914	0.280877	0.292085	0.276556	0.234839	0.409206	0.394615
ENSMUSG00000002803	1.01288	4.43512	1.43701	1.0125	1.93787	5.33068	4.77543	1.75413	3.5741
ENSMUSG00000002804	7.18646	5.2302	5.84316	7.74483	7.33263	6.11764	4.8901	4.90933	3.52424
ENSMUSG00000002808	0	0	0	0	0	0	0.0188825	0	0
ENSMUSG00000002812	28.2433	31.9587	30.4607	26.9596	30.4545	31.827	19.8368	26.0402	26.832
ENSMUSG00000002814	4.82108	6.14433	5.12717	4.17354	4.37029	5.28027	4.28159	5.09493	5.05197
ENSMUSG00000002820	3.37669	3.28531	3.01781	2.68137	3.04207	2.90421	3.62818	3.91683	3.46727
ENSMUSG00000002825	7.42945	9.94323	6.55933	6.48847	7.08651	7.95439	9.66798	10.3043	10.0944
ENSMUSG00000002831	0.103251	0.132437	0.232971	0.060933	0.245393	0.216337	0.016325	0.024113	0.088735
ENSMUSG00000002833	12.0713	14.2809	14.2059	11.2333	13.9704	13.9768	8.81692	9.87389	10.6748
ENSMUSG00000002835	13.7504	15.3444	15.1306	11.3288	13.4643	14.1818	8.67577	10.8462	10.846
ENSMUSG00000002844	9.18051	8.51905	8.13616	8.20276	7.95685	7.0117	13.1001	13.7104	10.3302
ENSMUSG00000002845	5.25074	5.37232	4.8399	5.56823	4.95932	5.10464	9.80577	8.11137	9.53021
ENSMUSG00000002846	6.63705	6.17969	6.42721	6.07657	6.0257	6.83829	7.65595	7.45967	5.32043
ENSMUSG00000002847	23.8349	20.2705	20.0501	20.4977	21.7274	19.1242	23.2672	21.1899	19.885
ENSMUSG00000002870	31.2189	34.7096	33.1795	28.9146	30.2549	31.2899	28.0542	32.6761	33.1321
ENSMUSG00000002871	3.97401	3.98408	4.25622	4.9535	5.35503	5.70792	3.79714	3.92273	3.54811
ENSMUSG00000002881	28.3372	28.69	28.9543	28.5852	27.9334	26.3821	28.2665	26.229	27.2564
ENSMUSG00000002885	9.63123	10.2495	10.8229	11.6373	12.7423	13.873	9.04579	10.2304	13.5957
ENSMUSG00000002897	2.5515	2.96214	2.89077	2.78344	3.17909	3.36661	4.73415	5.56412	5.62167
ENSMUSG00000002900	0.104844	0.174324	0.118622	0.243853	0.189364	0.251333	0.170706	0.241275	0.148819
ENSMUSG00000002908	0.0471629	0.0375029	0.0563024	0.0677279	0.121081	0.23334	0.18011	0.106993	0.12367
ENSMUSG00000002910	1.86618	2.12216	1.87414	2.66478	1.4387	2.07223	2.5417	2.45974	1.98787
ENSMUSG00000002930	0.029861	0	0	0	0	0	0	0	0
ENSMUSG00000002944	0	0.0655994	0.171729	0	0.0992593	0.332182	0	0.0694159	0.0845843
ENSMUSG00000002948	6.18005	7.54844	6.32567	8.63789	12.7183	8.49301	15.2023	13.4262	7.50307
ENSMUSG00000002949	10.6953	10.4663	11.5728	8.70851	10.111	10.2619	10.709	11.2838	10.8001
ENSMUSG00000002957	18.7	20.6303	20.2037	17.1691	19.8909	20.6264	21.7436	27.6538	24.5328
ENSMUSG00000002963	3.41668	4.5671	4.30202	3.86502	4.20518	4.15385	4.10616	3.88562	3.69226
ENSMUSG00000002968	6.80916	6.70562	6.81225	5.39805	5.64198	5.23669	5.02499	4.83699	6.54333
ENSMUSG00000002980	168.463	178.986	181.505	194.401	204.385	214.912	132.658	140.067	141.3
ENSMUSG00000002981	31.1379	25.6355	22.6704	23.7132	29.9698	23.5454	23.1101	22.1883	32.5438
ENSMUSG00000002983	6.35008	6.40346	5.69574	8.99387	8.8769	8.83951	6.11886	6.33908	5.83926
ENSMUSG00000002984	22.9733	20.8082	20.7847	16.8841	19.1152	20.0946	12.7837	13.4198	9.91311
ENSMUSG00000002985	30.4875	38.7152	36.9899	40.9147	37.7793	39.566	10.389	8.5555	10.198
ENSMUSG00000002992	1.52495	2.03839	2.44047	2.0311	1.32692	0.856315	0.192792	0.872791	0.110891
ENSMUSG00000002996	5.0963	4.39923	4.33203	7.42815	6.86769	6.8997	7.39947	6.90383	6.23125
ENSMUSG00000002997	0.0283763	0.0118813	0	0.0285234	0.0118406	0	0	0	0
ENSMUSG00000003031	7.15857	5.77629	6.3703	9.38921	8.5371	10.2034	19.4073	16.9094	16.5702
ENSMUSG00000003032	38.5035	43.1661	43.8041	59.9704	63.2833	62.9393	96.9687	100.712	112.314
ENSMUSG00000003033	32.6996	29.5277	25.6928	25.3801	24.4228	24.3308	15.5347	12.9527	17.0276
ENSMUSG00000003037	16.7819	19.3141	15.1964	16.1142	16.3166	16.5852	20.155	20.0547	23.3871
ENSMUSG00000003038	29.0735	17.9434	23.5802	19.5978	17.1442	14.6381	30.7706	22.4132	18.0386
ENSMUSG00000003039	29.5459	30.8074	28.5162	28.012	27.3262	27.2481	21.8864	21.4007	21.0985
ENSMUSG00000003051	65.7654	45.1381	62.0644	68.3996	65.5354	65.7486	72.3621	67.0746	47.056
ENSMUSG00000003053	0.150665	0.0850509	0	0.296867	0	0	0.0994374	0	0
ENSMUSG00000003062	5.88287	3.73534	4.37498	5.4128	4.72578	4.6191	5.66807	4.48801	3.67589
ENSMUSG00000003068	9.34984	9.61435	12.4977	13.2952	12.4038	15.1474	8.59742	13.1072	12.771
ENSMUSG00000003070	0.158899	0.236135	0.182567	0.340279	0.084054	0.127489	0.315595	0.559065	0.572327
ENSMUSG00000003072	44.2111	39.3248	42.447	42.3009	43.8562	39.5437	61.9318	52.6974	47.694
ENSMUSG00000003099	25.8063	26.99	27.9071	22.5795	23.265	21.6813	17.8735	16.1895	17.139
ENSMUSG00000003119	4.55627	6.73498	6.60053	4.2728	5.46805	6.01654	3.5534	6.63768	7.90726
ENSMUSG00000003123	1.06177	1.22126	1.471	1.28876	1.72422	1.54432	0.974559	1.29583	1.47403
ENSMUSG00000003131	26.9495	22.8919	23.6256	25.9338	24.0762	25.0592	20.213	18.917	16.5352
ENSMUSG00000003134	2.66962	2.41866	3.14902	2.47146	2.60547	3.1068	1.48862	1.92479	2.58833
ENSMUSG00000003135	19.6138	19.2699	18.0519	16.9393	16.9981	16.0916	16.1185	15.0238	19.0376
ENSMUSG00000003153	0.0144324	0.0119778	0.0483306	0.0825966	0.0610127	0.096348	0.0912043	0.179483	0.0217323
ENSMUSG00000003154	4.45823	5.52056	5.00942	5.132	5.84479	6.48878	8.00048	8.88507	10.5079
ENSMUSG00000003161	15.4751	10.679	11.8459	14.3005	10.5145	12.239	14.1413	12.1023	8.41443
ENSMUSG00000003166	8.43172	8.78188	9.10391	8.1067	9.16991	10.3955	7.68388	9.11586	7.72919
ENSMUSG00000003184	10.1618	10.2046	9.14856	10.5898	9.37232	9.5012	7.83314	7.94028	8.44393
ENSMUSG00000003190	4.01957	5.29775	4.85132	3.50942	3.57114	3.42435	2.41101	1.84737	3.18286
ENSMUSG00000003198	2.80161	2.92116	2.56934	1.17398	2.76439	3.60024	2.83771	1.10331	0.317483
ENSMUSG00000003199	16.9941	16.5854	16.3938	17.7315	17.9998	18.5654	16.8426	17.8754	16.5003
ENSMUSG00000003200	15.5826	15.3789	16.2756	13.0208	12.8231	13.5724	13.335	13.9214	14.2338
ENSMUSG00000003208	2.5244	2.60762	2.43179	1.91334	2.55887	2.25564	2.34402	2.28463	2.20641
ENSMUSG00000003226	23.7756	32.1285	32.6106	27.421	33.8204	35.8046	25.7407	38.9344	36.1741
ENSMUSG00000003227	0.014528	0	0.008053	0	0	0	0	0	0
ENSMUSG00000003228	1.01968	0.994954	0.94524	1.12302	0.800217	0.980819	0.663564	0.629304	0.610379
ENSMUSG00000003233	4.37403	5.61506	5.60828	4.0422	5.67169	4.82033	4.00524	4.9213	7.2418
ENSMUSG00000003234	10.2241	8.28773	8.89709	7.64109	6.95349	7.39926	7.27283	8.96535	7.34757
ENSMUSG00000003235	33.1129	32.1827	34.7825	28.4048	29.3993	26.3755	21.5907	21.5884	17.5805
ENSMUSG00000003269	23.4554	23.6244	19.9496	30.3579	28.9598	28.2396	23.5123	24.8439	23.1975
ENSMUSG00000003271	0.67549	0.265733	0.475501	0.786519	0.725405	0.675047	1.16164	1.53396	1.13623
ENSMUSG00000003273	0.0274342	0.0452165	0.0459271	0.0946482	0.0656074	0	0.226663	0.277559	0.0796868
ENSMUSG00000003279	0.0581369	0.0386417	0.0496357	0.0491453	0.0962493	0.0606268	0.077359	0.0555745	0.0688099
ENSMUSG00000003282	0.0498067	0.0461757	0.0686776	0.0368212	0.00528082	0.0240691	0.0917365	0.134603	0.0928546
ENSMUSG00000003283	0.008624	0	0	0	0	0	0	0	0
ENSMUSG00000003299	10.087	12.0104	9.96527	10.2419	8.65655	10.3818	11.7367	11.503	12.1448
ENSMUSG00000003308	9.12034	10.459	11.5209	10.2964	8.84848	10.9211	6.59425	8.33986	8.05081
ENSMUSG00000003309	0.0168271	0	0	0	0	0	0.0164491	0	0
ENSMUSG00000003316	32.3069	42.4827	43.0225	40.0583	48.9427	53.2269	33.8312	55.32	48.7499
ENSMUSG00000003341	0.378648	0.680954	0.512589	0.29484	0.526628	0.436305	0.150701	0.345604	0.162049
ENSMUSG00000003344	2.7642	2.7206	3.14274	3.24621	4.06302	4.14103	5.06384	5.65348	6.46113
ENSMUSG00000003345	16.3001	18.6038	18.2351	16.5109	18.068	19.9566	12.4514	14.0297	15.1803
ENSMUSG00000003346	23.2556	19.4323	21.6178	23.605	23.2155	25.6215	11.5709	11.5205	9.23713
ENSMUSG00000003348	7.09626	8.26239	7.97756	7.31693	7.91073	7.58027	6.92102	8.13569	7.45702
ENSMUSG00000003352	12.2757	14.7667	12.4087	14.9078	16.7633	17.5446	19.4535	21.1853	24.6704
ENSMUSG00000003354	0.955483	1.24282	2.02047	0.829685	0.816308	0.792809	0.179923	0.112165	0.0611319
ENSMUSG00000003355	11.1786	11.6597	11.1941	10.9303	10.4498	9.50484	17.759	15.4614	13.0371
ENSMUSG00000003360	36.2191	37.3651	37.7562	30.4717	31.5869	33.9605	22.1843	25.7687	23.3356
ENSMUSG00000003363	4.07793	4.47305	3.04816	4.71649	4.57551	4.45288	2.11851	2.55943	3.44482
ENSMUSG00000003378	0.333013	0.392518	0.321403	0.345262	0.676483	0.384588	0.263989	0.43116	0.443696
ENSMUSG00000003379	0.146984	0.195302	0.151207	0.237803	0.3911	0.036502	0.071148	0	0.067405
ENSMUSG00000003380	28.7559	27.0484	30.2488	32.6595	26.3441	31.992	51.3443	35.5779	22.4959
ENSMUSG00000003382	8.87281	10.9837	11.6377	10.5097	12.7867	13.2931	10.1224	12.4403	10.3351
ENSMUSG00000003402	31.8201	37.056	35.7931	34.4718	38.2835	41.2413	34.1241	40.4972	41.0985
ENSMUSG00000003410	0.00766873	0	0	0.0151184	0	0	0	0.00617326	0.0130619
ENSMUSG00000003411	0.196007	0.146144	0.270913	0.2843	0.144074	0.137765	0.080118	0.224305	0.0713112
ENSMUSG00000003418	0.00689437	0	0	0	0.00584769	0	0	0.00554949	0
ENSMUSG00000003420	8.38441	9.28853	16.0188	10.7868	16.9575	11.5484	16.311	23.1813	19.5553
ENSMUSG00000003421	12.3487	12.7829	12.2758	11.1916	12.7954	12.304	13.2341	12.6978	16.5294
ENSMUSG00000003423	11.638	10.2077	12.1761	12.3688	10.0215	12.565	6.67116	6.2083	5.7975
ENSMUSG00000003429	744.613	504.224	479.308	656.4	440.426	447.346	927.449	629.334	579.027
ENSMUSG00000003435	24.6173	28.4209	28.5881	25.8848	31.671	30.2751	32.9671	42.4663	42.1552
ENSMUSG00000003436	0	0	0	0	0	0.0140104	0.0371463	0.13661	0
ENSMUSG00000003437	11.4248	10.6222	11.4481	9.69741	10.7963	9.12153	7.34266	6.74011	8.24572
ENSMUSG00000003438	23.6802	20.2762	23.2412	20.9629	22.1235	20.9356	22.9151	23.4916	17.3453
ENSMUSG00000003444	16.5006	16.9382	15.0864	14.2322	11.3099	12.6843	11.4424	9.9695	12.5853
ENSMUSG00000003458	44.2288	44.1109	41.434	43.5478	41.7348	41.6777	42.3649	43.2131	42.3738
ENSMUSG00000003464	16.5545	15.8109	15.4028	14.8435	14.8375	13.738	17.0354	14.9455	14.4368
ENSMUSG00000003469	0.031456	0	0	0.0178979	0.015293	0	0.0356232	0.0292324	0.092943
ENSMUSG00000003476	0	0	0	0	0.00876204	0	0	0	0
ENSMUSG00000003477	0.0330242	0	0	0.259042	0	0	0.0638768	0.0265831	0
ENSMUSG00000003484	0.0284844	0	0.0241831	0	0	0	0.0544071	0	0
ENSMUSG00000003500	16.0253	13.7802	13.4705	16.982	17.6635	19.4098	22.4012	27.5344	18.1182
ENSMUSG00000003518	16.8739	10.0918	9.9948	11.076	19.5685	11.3254	14.6736	22.9161	10.9481
ENSMUSG00000003526	0.444568	0.224173	0.432422	0.309092	0.401025	0.468241	0.834078	0.565486	0.532189
ENSMUSG00000003527	3.16608	2.9619	3.50126	2.48177	1.99428	2.31847	2.40889	2.68366	3.11292
ENSMUSG00000003528	24.7271	31.3062	32.6498	27.2374	19.0599	25.6123	29.3011	21.5971	30.0361
ENSMUSG00000003531	3.65684	3.51029	3.93884	2.82221	3.45387	2.3359	3.36649	3.25239	2.21475
ENSMUSG00000003534	18.0461	21.0445	22.094	21.3488	23.8494	25.6296	11.5626	13.6813	15.0493
ENSMUSG00000003541	134.975	122.477	122.535	146.54	140.514	144.365	33.5777	33.7099	25.8954
ENSMUSG00000003545	0.403007	0.56088	0.376994	0.67858	0.513874	0.404044	0.402735	0.522748	0.530057
ENSMUSG00000003546	5.61266	6.207	7.86869	7.61067	9.60463	8.56853	7.19161	9.32679	6.73485
ENSMUSG00000003549	4.48264	5.98615	5.81949	6.05266	6.63799	6.57219	3.39245	3.72812	4.04281
ENSMUSG00000003555	0	0.0305586	0	0	0	0	0	0	0
ENSMUSG00000003559	0	0	0	0.0324306	0	0	0	0	0
ENSMUSG00000003573	13.0014	13.8142	13.2343	15.1351	16.3363	15.013	7.56883	8.2005	9.46559
ENSMUSG00000003575	0.838753	0.958429	0.633923	0.693514	0.802921	0.814456	0.395077	0.635509	0.666261
ENSMUSG00000003581	4.54014	4.50177	3.72353	4.93204	4.98826	5.77258	3.5925	4.07296	3.3985
ENSMUSG00000003585	3.61818	3.42957	4.06026	3.67671	3.84809	3.56488	2.68986	3.32072	2.3062
ENSMUSG00000003604	5.3861	4.14602	4.22882	4.21728	3.52235	3.15458	2.87135	1.85469	1.72861
ENSMUSG00000003617	7.37163	8.27682	7.68366	5.04815	5.37334	5.02968	1.51017	1.24001	1.4912
ENSMUSG00000003623	4.3983	2.91308	3.83633	4.35831	3.47418	4.00768	3.80736	3.65161	3.15315
ENSMUSG00000003644	2.26206	2.59294	2.70442	1.56332	2.02429	1.36332	3.18253	4.28777	4.42893
ENSMUSG00000003657	0	0	0	0	0.077141	0	0	0	0
ENSMUSG00000003660	30.0457	38.291	37.5968	26.8509	33.8298	33.8553	25.7873	35.1692	36.3528
ENSMUSG00000003662	16.961	15.768	15.9235	15.661	15.7141	15.7026	14.7127	14.023	11.0731
ENSMUSG00000003665	0.345748	0.414289	0.457407	1.39403	1.57352	1.15438	0.0277002	0.160039	0.0433097
ENSMUSG00000003680	1.40034	1.4905	1.38561	0.896821	1.22951	1.57213	0.684052	0.948403	0.757979
ENSMUSG00000003721	13.7726	8.35453	10.2137	15.8204	14.6857	12.5305	22.0167	18.99	14.4582
ENSMUSG00000003731	12.3411	13.1957	13.0936	10.6458	11.4789	11.8922	8.67406	10.6044	10.6518
ENSMUSG00000003746	2.20812	1.87746	2.28381	1.31958	1.71716	1.60011	2.38935	2.29255	2.49584
ENSMUSG00000003752	1.36816	1.25367	1.44624	1.16926	1.90118	1.37205	1.49353	1.9031	1.33478
ENSMUSG00000003762	0.927058	1.23093	1.24511	1.24877	1.42479	1.55719	1.53616	1.42979	1.29425
ENSMUSG00000003778	7.96911	8.00878	8.19714	6.82718	7.99082	6.66167	7.90293	9.77607	9.66397
ENSMUSG00000003779	40.9207	38.2269	39.6027	34.8549	30.4042	33.417	15.1551	17.424	16.568
ENSMUSG00000003808	14.5048	13.7212	16.0798	11.9886	14.4819	16.537	10.3179	12.4603	12.3108
ENSMUSG00000003809	8.94411	7.86908	8.48642	8.01091	7.02847	7.5442	4.49029	4.85799	2.56168
ENSMUSG00000003810	23.9869	27.2103	26.6813	20.3878	26.7518	28.8717	16.1531	22.2635	30.4097
ENSMUSG00000003812	7.38662	7.30828	6.67472	7.02518	6.60132	6.3949	5.49933	5.24022	4.17245
ENSMUSG00000003813	24.6122	24.624	23.5168	22.4228	24.2851	24.5815	22.7632	22.0691	26.5347
ENSMUSG00000003814	452.048	388.883	377.59	362.347	310.055	316.765	359.03	300.348	343.245
ENSMUSG00000003824	0.109747	0.27613	0.09777	0.255633	0.103165	0.125472	0.221455	0.232791	0.118891
ENSMUSG00000003847	7.58898	9.2031	9.1334	10.7877	12.0535	11.5098	11.4166	13.5057	14.6429
ENSMUSG00000003848	25.4812	27.2023	24.4387	18.2402	22.0065	21.0772	17.2347	17.3866	18.9674
ENSMUSG00000003849	4.03365	2.17396	2.27651	4.27991	2.7381	3.14002	1.33054	1.47536	1.61779
ENSMUSG00000003863	0.353335	0.356123	0.248265	0.225555	0.252823	0.352227	0.395784	0.403615	0.586746
ENSMUSG00000003865	10.2018	11.5303	10.6715	9.70638	10.0517	10.9934	20.3584	24.0348	20.0288
ENSMUSG00000003868	31.5159	33.9648	32.5012	29.3362	29.147	30.4119	23.2843	23.6025	21.6308
ENSMUSG00000003872	0.143272	0.117458	0.0938752	0.0769494	0.0919049	0.087047	0.181914	0.145082	0.118256
ENSMUSG00000003873	78.6291	70.4529	69.3093	69.7278	64.6538	77.1642	67.2313	81.1562	56.8096
ENSMUSG00000003923	12.749	10.2275	11.8068	14.7502	13.7527	12.9132	14.0415	13.0143	8.97121
ENSMUSG00000003929	2.4638	2.38729	2.49578	2.48947	2.46243	2.58886	2.79133	2.97825	2.54471
ENSMUSG00000003934	1.25659	1.08743	0.963752	0.782375	0.589331	0.466445	0.602212	0.912225	0.785318
ENSMUSG00000003948	10.8243	8.93332	8.15546	7.09412	5.67375	6.18704	8.34636	7.85011	6.49064
ENSMUSG00000003949	0.0079086	0.032679	0	0	0.0200785	0.00696531	0.00775828	0	0.0337118
ENSMUSG00000003955	29.2032	25.3743	27.806	32.5305	24.801	29.743	64.2097	58.9131	39.2683
ENSMUSG00000003970	493.245	400.571	448.29	464.538	431.528	461.329	603.226	541.665	344.245
ENSMUSG00000004018	6.95699	5.75949	5.55433	4.48433	4.48657	3.72364	4.65984	3.3335	2.54815
ENSMUSG00000004032	5.37244	3.12175	4.07566	6.30881	4.30954	5.89804	7.64698	4.36328	5.40375
ENSMUSG00000004035	0.236204	0.299175	0.391599	0.333795	0.0559891	0	0.273017	0.097066	0.373067
ENSMUSG00000004038	0	0	0	0.056095	0	0	0.052955	0	0
ENSMUSG00000004040	11.2402	12.2477	11.5674	9.03349	10.3964	9.94435	15.1797	17.1833	17.3818
ENSMUSG00000004043	3.65918	4.72277	4.72384	5.29175	5.57944	6.61234	8.74737	11.1429	11.0364
ENSMUSG00000004044	136.531	152.847	153.071	116.917	138.731	145.064	93.3254	105.139	98.8248
ENSMUSG00000004054	7.33331	10.0647	11.3071	7.01708	7.82564	7.33524	5.90617	8.96931	10.0278
ENSMUSG00000004056	14.0741	14.6022	14.0452	13.3606	14.2537	14.7242	11.8725	12.7264	13.1602
ENSMUSG00000004069	19.1057	18.4544	19.2329	15.9808	17.2241	18.6463	17.0093	17.11	17.2129
ENSMUSG00000004070	27.7631	19.0477	20.9954	22.2367	17.3238	17.5015	18.9277	13.3982	14.1148
ENSMUSG00000004071	7.29884	6.81058	7.23584	6.24296	6.05002	6.1744	6.49092	5.48651	3.78899
ENSMUSG00000004085	6.46532	7.82072	7.7006	6.52483	7.62483	8.01838	4.21158	5.47948	5.44876
ENSMUSG00000004096	69.178	60.3531	55.4265	64.0354	53.6591	49.2057	75.8216	58.6069	75.1131
ENSMUSG00000004098	0.0155199	0.0766048	0.00644881	0.0111776	0.00658271	0	0.0228368	0	0.0198605
ENSMUSG00000004099	41.1111	57.6634	55.8332	40.2073	48.3233	50.0961	26.4191	34.7857	41.1706
ENSMUSG00000004100	16.8592	15.8774	16.0646	12.888	13.9911	12.7372	16.8063	17.0488	19.5964
ENSMUSG00000004105	0.358335	0.314258	0.221131	0.443344	0.588308	0.487485	0.0612031	0.151078	0.0940717
ENSMUSG00000004110	0.00209431	0.0137227	0.00175955	0	0.00355282	0	0	0	0
ENSMUSG00000004113	0	0	0.0180491	0	0.0225401	0	0.0182469	0	0
ENSMUSG00000004127	3.27427	3.01493	3.32578	3.10441	3.13536	2.72459	3.55305	3.30679	3.08206
ENSMUSG00000004151	0.00397399	0	0.00843465	0.0114482	0.00840349	0.00350018	0.00675356	0	0
ENSMUSG00000004187	0.0730581	0.0411491	0.148316	0.0525626	0.266269	0.161026	0.244218	0.0216339	0.0656858
ENSMUSG00000004207	231.445	230.281	235.281	266.505	275.122	281.877	190.162	201.346	173.386
ENSMUSG00000004221	9.4931	6.13261	9.18629	12.4748	8.07563	13.4066	4.69613	4.33064	3.76176
ENSMUSG00000004231	6.38379	7.56747	7.46945	4.52454	5.13142	6.38361	2.50676	2.96071	4.40603
ENSMUSG00000004233	2.22368	2.38847	1.7621	1.86885	1.88227	2.08792	2.26408	2.24835	2.0892
ENSMUSG00000004263	32.7554	46.483	40.9481	32.0108	38.7149	39.3257	35.5245	41.977	75.6457
ENSMUSG00000004264	87.721	71.7899	79.7569	74.3376	75.4773	74.423	86.6175	81.0157	65.872
ENSMUSG00000004266	10.1381	9.98921	10.7297	10.0596	10.8681	10.7332	8.79773	7.58092	10.2926
ENSMUSG00000004267	0.494479	0.184911	0.475082	0.285244	0.562907	0.3852	0.256046	0.480732	0.531705
ENSMUSG00000004268	28.1213	24.1735	22.8737	21.0951	19.8491	19.2052	26.3136	24.104	18.2646
ENSMUSG00000004270	45.6566	43.4373	45.5366	39.8024	45.1673	39.1358	41.2245	43.6037	47.4621
ENSMUSG00000004285	57.0601	50.0352	51.1613	53.6197	50.1803	49.1689	50.6788	45.3344	33.1565
ENSMUSG00000004317	33.1431	40.5374	42.9385	28.3458	33.8124	33.4674	12.089	15.6944	14.257
ENSMUSG00000004319	4.73058	4.99805	5.48565	4.44447	4.90325	5.37203	6.80778	7.90509	7.27447
ENSMUSG00000004328	0.00790184	0	0	0	0	0	0	0	0
ENSMUSG00000004344	0	0.077852	0	0	0	0	0	0	0
ENSMUSG00000004347	0.0198722	0.0440242	0	0.0150593	0.013105	0.00453582	0	0.00621822	0
ENSMUSG00000004356	16.3766	21.6552	22.6882	15.6079	18.4578	18.7648	10.7146	15.4201	14.214
ENSMUSG00000004359	0	0.0680189	0	0	0	0	0	0	0
ENSMUSG00000004364	37.0565	35.8298	34.8511	37.8217	35.9579	34.6436	42.4545	40.171	37.7248
ENSMUSG00000004371	0.0874381	0.170678	0.107633	0.262317	0.237205	0.113186	0.0328046	0.158688	0.0950646
ENSMUSG00000004383	0.0359645	0.0160231	0.0305973	0.0221424	0.0337154	0.034925	0.00974787	0	0.0328352
ENSMUSG00000004393	33.4438	29.5497	28.607	26.6046	24.8523	26.6961	21.3738	23.0763	20.0342
ENSMUSG00000004394	34.786	30.3478	31.923	33.8509	33.0093	29.5179	35.8821	32.8371	29.7467
ENSMUSG00000004415	0.0129254	0.00526948	0.0073804	0	0	0	0.00633956	0	0.00551336
ENSMUSG00000004446	29.9401	13.3183	25.3694	29.4305	28.0514	27.5543	23.501	22.4631	24.0312
ENSMUSG00000004451	17.6775	16.7529	18.2279	19.552	18.4478	20.3258	18.3053	16.1978	14.5779
ENSMUSG00000004455	30.7989	34.343	34.3132	42.3933	24.5802	26.0746	27.2625	40.1093	24.7104
ENSMUSG00000004460	24.9722	20.9207	21.0767	20.2444	19.5119	16.7061	27.2022	22.7471	21.1317
ENSMUSG00000004462	0.990063	1.27282	1.23486	0.846943	0.627492	0.868906	0.880021	0.846673	0.744976
ENSMUSG00000004473	0.501677	0.540997	0.56018	1.31885	1.4297	1.09838	0.401107	0.39025	0.304013
ENSMUSG00000004500	2.74381	2.66038	1.93548	2.51056	2.78795	2.08731	1.75608	2.23358	2.51139
ENSMUSG00000004508	1.0748	1.36105	1.36685	1.09084	1.37898	1.18628	0.297429	0.490567	0.474033
ENSMUSG00000004530	12.6454	16.9072	16.5669	12.1648	16.0124	16.0502	13.3166	17.5089	17.9935
ENSMUSG00000004535	16.7065	16.2022	17.1652	20.8911	17.9458	18.3796	18.3491	17.7046	17.4938
ENSMUSG00000004540	6.61863	8.04869	4.98878	9.76748	7.351	7.1534	9.60552	7.31979	10.6977
ENSMUSG00000004542	0.578794	0.353807	0.175596	0.534102	0.481203	0.569483	0.541742	0.274949	0.24868
ENSMUSG00000004552	1.29144	1.05766	0.612185	1.74666	1.58219	1.41821	1.02415	1.214	1.11905
ENSMUSG00000004558	4.75013	4.36037	4.22604	4.75379	4.76598	4.46333	12.6417	12.9921	11.4849
ENSMUSG00000004561	1.49508	1.25504	1.0492	1.35879	1.20866	1.45376	1.44779	1.3742	1.59757
ENSMUSG00000004562	3.87868	4.1612	4.68904	4.52088	4.74607	4.86444	3.38263	4.06646	4.62814
ENSMUSG00000004565	5.2768	6.44394	5.93701	4.39151	4.98258	5.15585	3.94538	5.62767	4.47854
ENSMUSG00000004567	4.07109	3.98473	4.16967	4.43464	4.10648	3.94101	4.13265	4.62374	5.12141
ENSMUSG00000004568	4.0432	2.78065	4.09035	4.19265	4.98154	5.06812	1.67679	3.91036	3.01618
ENSMUSG00000004591	10.3864	9.30277	10.5672	11.5152	12.3562	11.6674	11.5312	11.6437	11.1715
ENSMUSG00000004609	0.098018	0.117512	0.092161	0.125119	0.0922392	0.137125	0.043096	0.0886604	0.0398491
ENSMUSG00000004610	37.2376	39.2151	38.8386	35.6767	35.0741	40.4294	46.1212	57.2653	31.6632
ENSMUSG00000004612	0	0	0.147243	0	0	0	0	0	0
ENSMUSG00000004626	18.0978	18.6022	18.3044	18.3747	17.9873	18.9111	23.2812	24.6773	26.2375
ENSMUSG00000004630	0.00861268	0.141664	0	0	0	0	0.0385736	0	0.00857206
ENSMUSG00000004631	0	0.0287226	0	0	0.00633522	0	0	0	0
ENSMUSG00000004633	2.87952	2.89109	3.18551	2.76339	3.05522	2.45965	1.32155	1.47442	1.71291
ENSMUSG00000004637	0.975599	0.94413	1.03883	0.734195	0.939325	0.933141	0.662763	0.870964	0.855459
ENSMUSG00000004642	6.28391	5.68386	5.7752	5.46243	4.78747	4.79613	5.50551	5.15293	4.45391
ENSMUSG00000004655	0.080455	0.016575	0.066502	0.039652	0.017061	0.289312	0	0.064762	0
ENSMUSG00000004661	0.486355	0.56739	0.432524	0.526081	0.474432	0.411653	0.822634	0.980176	1.09217
ENSMUSG00000004665	54.4797	52.9956	57.5229	63.8441	68.4407	66.5259	37.5166	40.4188	41.8406
ENSMUSG00000004667	21.8661	23.7579	24.9971	24.3787	23.507	25.0321	29.7966	31.7282	29.9044
ENSMUSG00000004668	0.00262023	0.0132372	0	0	0	0	0	0	0
ENSMUSG00000004677	9.47231	14.8046	13.6977	9.49916	12.9421	11.5956	6.78667	10.7323	11.8206
ENSMUSG00000004698	0.024338	0.0361763	0.0331711	0.0522812	0.0512351	0.0907862	0.0280462	0.0223615	0.0484257
ENSMUSG00000004707	0.431243	0.311251	0.232805	0.264469	0.13548	0.431359	0.0546909	0.0128613	0.283753
ENSMUSG00000004709	0.0418931	0.00893039	0	0.042689	0.0550858	0	0	0	0
ENSMUSG00000004730	0	0	0	0	0	0	0.032015	0	0.041078
ENSMUSG00000004748	2.81732	1.87251	3.1577	2.01774	1.95782	2.3159	3.78588	4.61931	4.40388
ENSMUSG00000004768	2.72382	2.80029	3.2849	2.49982	2.02699	2.23604	2.01951	2.56458	2.4723
ENSMUSG00000004771	22.6003	16.2982	19.9569	23.3354	17.8844	18.2519	21.7246	16.2096	14.7418
ENSMUSG00000004788	20.8002	20.7959	22.2109	20.0328	18.2858	19.0979	15.965	12.6848	12.2177
ENSMUSG00000004789	10.2975	10.918	10.5081	9.27933	10.8775	10.2248	8.00414	9.26098	8.74088
ENSMUSG00000004791	0.0765504	0.0322584	0.0803362	0.0301073	0.0154384	0.053053	0.142099	0.168379	0.0391475
ENSMUSG00000004798	4.44887	5.96992	5.37907	5.7546	6.84661	6.90296	2.9885	2.91082	3.83813
ENSMUSG00000004815	1.93979	2.5893	1.69644	1.97392	1.27546	1.67928	0.969779	1.36372	0.928514
ENSMUSG00000004837	0.585133	0.38694	0.345252	0.215611	0.199004	0.568984	0.101075	0	0
ENSMUSG00000004843	40.8197	30.9348	33.6027	38.6654	30.6243	30.9125	37.1824	26.9462	24.744
ENSMUSG00000004846	34.3631	37.8755	38.9854	33.6622	43.2528	41.9524	31.4193	39.7914	33.8769
ENSMUSG00000004849	126.047	107.695	111.964	104.562	101.037	96.5549	88.8408	80.6879	61.3654
ENSMUSG00000004865	16.8864	18.3732	15.0157	12.4399	16.0541	14.3377	11.2975	11.8092	12.2154
ENSMUSG00000004872	0.186943	0.229005	0.200582	0.268138	0.236584	0.252874	0.262268	0.268761	0.18112
ENSMUSG00000004880	39.9456	38.8614	42.4298	30.9427	33.8348	33.1151	31.6874	32.3832	21.8561
ENSMUSG00000004885	0.457529	0	0.256218	0.210816	0.0946211	0	0.139157	0.120687	0.204025
ENSMUSG00000004891	20.3754	26.2686	30.2468	21.5876	28.34	27.1893	0.194338	0.37282	0.58458
ENSMUSG00000004892	0.0708696	0.041575	0.13127	0.0833818	0.11832	0.14992	0.0506231	0.0723573	0.107252
ENSMUSG00000004894	0	0	0.01892	0	0	0	0	0	0
ENSMUSG00000004895	27.1676	28.7541	29.2088	22.5232	24.6013	24.0201	20.9391	19.7909	27.439
ENSMUSG00000004896	2.20251	2.23558	2.1638	1.82116	1.86143	2.24957	2.43828	2.01165	1.69654
ENSMUSG00000004897	219.663	228.146	222.354	194.604	194.695	194.198	244.261	240.578	259.953
ENSMUSG00000004902	0.11936	0.160057	0.096309	0.006495	0.070287	0.097407	0.098598	0.103015	0.03801
ENSMUSG00000004929	7.64349	9.05162	8.31745	6.75931	7.19519	7.73833	3.48728	4.23677	4.50484
ENSMUSG00000004931	3.4386	3.70766	8.23537	3.04922	4.67445	4.73146	3.10835	3.52674	3.51357
ENSMUSG00000004933	0.0449132	0.0659481	0.11319	0.0328382	0.027707	0.222345	0.0413257	0.0434876	0.0392588
ENSMUSG00000004934	6.57271	6.3807	5.96949	6.27302	5.80202	6.1712	6.41593	7.87367	6.53518
ENSMUSG00000004936	25.848	23.0433	23.1294	25.5318	24.9185	23.2742	37.4634	35.9887	28.8927
ENSMUSG00000004937	27.3607	31.7238	29.4895	27.8849	28.907	30.207	26.4645	29.416	39.8174
ENSMUSG00000004945	19.5505	12.519	16.2655	14.8574	12.9645	15.7878	17.0495	15.1706	8.21848
ENSMUSG00000004947	2.86677	3.35956	3.21958	2.43081	2.7249	2.66606	2.50775	2.41154	3.40544
ENSMUSG00000004948	0	0	0	0	0.084692	0	0	0	0
ENSMUSG00000004951	0.168796	0.828605	0.016252	0.216477	0.413131	0.121988	0.18286	0.178134	0.231281
ENSMUSG00000004952	0.126503	0.211438	0.162284	0.0676974	0.0539626	0.0948751	0.215607	0.288345	0.221475
ENSMUSG00000004961	0	0.0533699	0	0	0	0	0	0	0
ENSMUSG00000004980	148.746	138.406	131.131	139.603	125.545	103.082	145.839	131.206	95.939
ENSMUSG00000004988	0	0.019257	0.200072	0.0447729	0	0	0.00690114	0.153561	0.105013
ENSMUSG00000004994	2.80683	3.33232	2.45389	2.55538	2.67347	2.9447	3.07865	3.54355	4.44573
ENSMUSG00000004996	13.5197	11.7569	13.5055	13.2465	10.7971	10.0741	12.9922	13.2094	9.25619
ENSMUSG00000005034	7.94594	7.55765	7.47404	7.7476	7.26231	7.7507	9.19319	9.86521	9.62241
ENSMUSG00000005043	4.42937	4.90384	4.55766	5.29317	6.61282	6.15571	5.10744	6.23169	7.23508
ENSMUSG00000005045	0.0988215	0.185083	0.195307	0.226113	0.290368	0.27106	0.419185	0.560926	0.545396
ENSMUSG00000005054	320.49	262.45	265.709	256.793	200.996	210.655	206.744	163.961	169.941
ENSMUSG00000005057	0.460355	0.404395	0.391476	0.231241	0.245263	0.31225	0.471759	0.469238	0.636734
ENSMUSG00000005069	18.94	18.7184	22.3367	17.6902	19.7636	21.2986	16.725	17.8299	11.4456
ENSMUSG00000005078	13.5459	10.4721	11.967	12.6396	11.1717	12.3049	8.90291	7.52698	7.11962
ENSMUSG00000005087	95.0679	84.1727	91.4658	126.113	119.958	120.828	85.8274	76.8195	72.0647
ENSMUSG00000005089	1.12545	1.75382	1.50039	0.45698	0.552881	0.352351	0.232784	0.197096	0.210704
ENSMUSG00000005102	5.59134	6.40007	7.55487	5.76519	6.60759	7.10387	5.11615	5.78447	6.79916
ENSMUSG00000005103	11.6729	12.9597	12.3467	10.5652	11.6783	11.2693	8.32629	8.59446	7.93144
ENSMUSG00000005107	0.424249	0.318903	0.443159	0.361176	0.688224	0.539021	0.185463	0.295045	0.313133
ENSMUSG00000005124	0	0.0156491	0.0161226	0	0	0	0	0.0535006	0.0242146
ENSMUSG00000005125	11.0005	10.618	10.1113	17.1788	17.438	17.4634	62.9115	61.6242	70.9819
ENSMUSG00000005131	0.247113	0.189352	0.182596	0.296361	0.0633216	0.480725	0.303591	0.252627	0.307983
ENSMUSG00000005142	6.73945	7.49954	7.61613	6.14282	7.57794	7.06506	2.60287	2.60671	3.08713
ENSMUSG00000005148	0.0406371	0.0162851	0.00862523	0	0.104379	0	0.0993761	0	0.163301
ENSMUSG00000005150	3.14376	2.11673	2.5362	3.29475	3.4394	1.97474	1.68866	2.17725	1.19151
ENSMUSG00000005161	87.4777	67.5223	76.2078	77.6565	75.2911	70.7265	50.1323	43.7853	30.9989
ENSMUSG00000005198	42.7726	47.9359	48.5836	38.5777	45.1192	44.2974	41.2392	47.0874	58.5428
ENSMUSG00000005202	0	0	0.0163524	0	0	0	0	0	0
ENSMUSG00000005204	22.591	26.1784	21.1581	23.0355	20.9558	22.3694	18.8386	18.2621	12.2993
ENSMUSG00000005220	0.00981944	0	0	0	0	0	0	0	0
ENSMUSG00000005225	3.91553	3.55546	4.11695	3.17251	3.29332	2.98105	2.76357	2.8479	2.7385
ENSMUSG00000005232	0	0	0	0	0.0847422	0	0	0	0
ENSMUSG00000005233	10.8316	9.29648	9.51398	9.2736	8.3205	7.36549	6.05237	5.00588	2.55893
ENSMUSG00000005237	0.0121045	0	0.0112586	0.0252653	0.0186736	0.00918758	0.0112109	0.0054512	0.0169734
ENSMUSG00000005251	0	0	0.024237	0	0	0	0	0	0.025106
ENSMUSG00000005262	7.20437	6.43196	5.90364	6.91775	5.67163	7.47976	8.21784	6.64996	5.5847
ENSMUSG00000005267	0	0	0	0	0.023242	0	0	0	0
ENSMUSG00000005268	0	0	0	0.0169776	0.00584358	0.00910162	0	0	0.0176327
ENSMUSG00000005299	6.25981	5.85453	6.44799	4.87734	5.12042	5.61303	3.3733	3.76656	4.01763
ENSMUSG00000005312	49.4127	51.3333	50.1618	50.4233	52.8009	53.8072	51.6401	54.2562	64.0448
ENSMUSG00000005320	6.82664	6.73047	6.52386	2.44237	3.34163	3.16355	0.161145	0.335482	0.239743
ENSMUSG00000005338	0	0	0	0	0.00618344	0	0	0	0
ENSMUSG00000005354	9.338	8.78106	11.4357	11.1595	9.34784	9.98039	7.88105	6.02593	12.8608
ENSMUSG00000005355	0.0330289	0	0.0374775	0.0435117	0	0	0.0216504	0	0
ENSMUSG00000005360	0	0	0	0.00610089	0	0	0	0	0
ENSMUSG00000005362	5.83343	5.49252	5.49968	7.00881	6.63349	6.62329	8.84291	8.62114	7.91502
ENSMUSG00000005364	0.770784	0.558052	0.621287	1.08047	1.10894	0.869139	0.419286	0.484662	0.389434
ENSMUSG00000005370	23.2728	24.2868	24.8923	18.605	20.1861	18.4368	14.0228	14.9798	13.572
ENSMUSG00000005371	11.5491	11.9117	11.7838	13.9343	12.1779	12.126	14.7974	14.7387	17.2293
ENSMUSG00000005373	0.714218	1.42474	0.813829	0.425624	0.596149	0.737946	0.028078	0.0795304	0.0569775
ENSMUSG00000005374	5.3291	5.28791	5.01142	3.55638	3.91967	3.91649	7.67341	9.35094	7.85398
ENSMUSG00000005378	11.1802	10.8426	10.696	8.32823	7.39645	8.47623	3.99346	4.40477	3.98705
ENSMUSG00000005397	36.5766	50.8686	49.4841	31.0006	37.5859	38.4852	31.6874	41.2699	45.5422
ENSMUSG00000005410	51.9352	53.8138	53.9117	40.8264	40.6346	44.8797	25.7151	27.4061	25.0052
ENSMUSG00000005413	41.839	38.5644	38.8211	17.7416	19.1229	15.6714	53.8048	54.4383	68.1561
ENSMUSG00000005417	22.0672	27.8472	27.6225	22.1431	26.1182	27.106	12.1537	15.4814	17.0228
ENSMUSG00000005442	4.78381	8.85315	8.02851	7.63188	9.78561	10.0075	7.7481	10.1975	13.6354
ENSMUSG00000005447	13.3637	12.1239	11.6838	13.7815	13.7307	11.9842	19.8354	17.5623	10.1516
ENSMUSG00000005465	0.0302367	0	0	0	0.0384712	0	0	0	0
ENSMUSG00000005469	34.1986	32.7944	35.073	27.8629	28.3931	27.2329	22.2007	19.6762	22.4903
ENSMUSG00000005470	30.1774	28.5853	27.6422	23.5588	22.1577	21.9346	19.2353	17.673	19.8236
ENSMUSG00000005474	0	0	0	0	0	0.270783	0	0	0
ENSMUSG00000005481	51.1776	40.102	45.5004	39.7181	40.2928	40.2592	20.999	20.0231	12.5557
ENSMUSG00000005483	30.1132	26.8169	26.893	20.6304	20.3476	20.6874	18.8028	15.4835	16.7644
ENSMUSG00000005493	0.00769018	0	0.0780742	0.00532193	0.0260009	0.0102412	0.00751754	0.0123375	0.00621348
ENSMUSG00000005501	4.3324	5.08637	4.95803	4.1642	4.81966	4.68316	3.87564	4.93033	4.59945
ENSMUSG00000005505	2.59629	3.7045	2.87642	2.13842	2.58446	1.88587	1.9556	2.14421	1.65677
ENSMUSG00000005506	27.1266	35.0892	33.5203	26.5267	30.7691	30.7212	28.7496	34.147	33.6076
ENSMUSG00000005510	24.6977	20.4448	20.9698	21.7583	17.9332	18.4712	18.8321	12.6742	11.1833
ENSMUSG00000005514	35.3491	38.6121	34.2688	29.325	32.6779	31.9667	31.1084	31.4548	44.1205
ENSMUSG00000005533	0.0156565	0.0181531	0.0306868	0.00926187	0	0.016629	0	0	0
ENSMUSG00000005534	3.65343	4.63757	4.52792	1.96568	5.13545	5.09411	5.86785	7.60814	7.08854
ENSMUSG00000005540	0	0	0	0.0168447	0.0289901	0.0885735	0.0250855	0	0
ENSMUSG00000005547	0	0	0	0	0	0	0.0250028	0	0
ENSMUSG00000005566	77.1452	74.2812	78.7547	64.1561	75.5866	66.5084	62.0117	64.9148	59.1523
ENSMUSG00000005575	30.8304	26.7384	25.9052	26.5131	24.697	21.8446	27.1995	22.1001	28.0194
ENSMUSG00000005580	1.06746	1.56557	1.79749	1.38526	2.1073	2.49279	1.21821	2.4359	1.91898
ENSMUSG00000005583	0.050194	0.0591532	0.0352601	0.0248219	0.0398476	0.0384964	0.0131927	0	0
ENSMUSG00000005609	10.9541	13.3025	11.8702	9.41697	10.5966	11.0232	8.52561	9.22769	10.132
ENSMUSG00000005610	102.148	97.4314	99.6365	92.2022	87.8226	90.0881	94.2013	95.2949	91.4514
ENSMUSG00000005611	0.0899595	0.0862173	0.0854229	0.113845	0.113569	0.0962737	0.0454995	0.128923	0.199519
ENSMUSG00000005615	1.46253	2.15926	2.16635	1.45917	5.68144	6.0019	4.77582	2.29631	4.90927
ENSMUSG00000005621	6.22749	7.5397	6.64445	7.72627	8.76853	8.7336	6.55909	8.34099	10.5425
ENSMUSG00000005625	52.0466	50.3596	51.8023	49.7745	48.2902	45.5966	50.5993	51.2633	43.5456
ENSMUSG00000005628	0.124066	0.0376246	0.113433	0.208778	0.0518439	0.0881721	0.167423	0	0.0839724
ENSMUSG00000005640	0	0	0.0382168	0	0.00784408	0.0429866	0.0743522	0.0868437	0.109439
ENSMUSG00000005656	38.9328	31.6952	32.3854	40.2684	35.921	34.5723	30.9377	28.588	22.871
ENSMUSG00000005667	10.9095	9.63358	9.09342	23.1517	20.6961	20.3161	60.7632	56.3497	46.6478
ENSMUSG00000005672	0.0473744	0.0759376	0.035169	0.00584503	0.0100591	0	0.0058168	0	0
ENSMUSG00000005674	9.59124	7.59335	10.4984	7.24459	7.87853	7.92617	6.0161	7.8375	3.36952
ENSMUSG00000005677	0.723163	0.129865	0.134984	0.192258	0.271999	0.231228	1.58448	0.655326	1.06354
ENSMUSG00000005681	6.29384	1.01989	2.5435	6.23941	0.332083	0.63269	6.27896	1.09962	0.881401
ENSMUSG00000005682	4.95724	5.09942	5.55795	4.90143	5.26982	5.7131	7.14003	8.41388	8.87657
ENSMUSG00000005683	92.7062	87.4046	84.8038	89.5004	88.1037	86.8474	88.6979	87.4501	88.054
ENSMUSG00000005686	1.50409	1.80646	2.09056	1.394	1.54527	2.08763	5.9582	6.06064	7.487
ENSMUSG00000005687	12.1138	10.4216	10.3936	11.3605	9.53808	10.0999	10.1553	7.4792	8.1665
ENSMUSG00000005698	22.8139	25.2052	23.8734	23.2629	24.9971	21.4509	18.2683	20.3571	18.7524
ENSMUSG00000005699	1.08504	1.19237	2.07741	1.55507	0.847596	1.69116	1.27894	1.43063	1.83374
ENSMUSG00000005705	0.109068	0.385267	0.293173	0.285906	0.351117	0.292133	0.151554	0.203756	0.346485
ENSMUSG00000005718	6.24177	7.04435	7.1863	6.29336	7.37714	6.81942	7.71906	7.6573	10.0703
ENSMUSG00000005732	110.078	105.508	99.974	93.6886	87.008	83.6974	73.1454	74.9474	84.841
ENSMUSG00000005763	0	0.00334631	0	0.00412774	0	0	0	0.0315127	0.0169178
ENSMUSG00000005774	1.88184	2.02275	1.78607	1.8082	2.42977	2.06774	2.51883	1.42378	2.53682
ENSMUSG00000005779	109.177	70.978	81.6029	96.2867	78.5002	79.391	102.405	78.8447	39.8635
ENSMUSG00000005802	12.2224	12.1809	13.9687	13.4971	14.1045	13.9789	20.514	23.7568	18.5063
ENSMUSG00000005803	2.19868	2.07158	1.83365	2.76708	2.63334	2.55447	2.50041	2.04114	1.62453
ENSMUSG00000005804	4.5153	3.88482	8.77608	10.0328	9.37045	9.10547	6.41149	6.37646	12.2171
ENSMUSG00000005813	15.7373	13.1815	13.3123	12.4817	12.368	11.5686	10.085	9.59057	8.77292
ENSMUSG00000005823	9.66432	13.6321	11.5276	11.6449	11.9965	15.2671	14.8717	14.8181	17.8251
ENSMUSG00000005824	0	0	0	0.028199	0	0	0	0	0
ENSMUSG00000005836	0	0	0	0	0	0.00687376	0.0117469	0	0
ENSMUSG00000005846	121.661	97.7702	102.962	111.237	94.6483	97.9762	113.548	90.2269	84.9264
ENSMUSG00000005864	0.0170723	0	0	0	0	0	0	0	0
ENSMUSG00000005871	5.20271	2.71915	6.61519	3.95169	4.96079	3.91835	3.94718	2.28076	3.36626
ENSMUSG00000005873	47.5773	42.1396	38.7442	50.8756	42.2304	43.8418	59.8996	52.7444	59.0297
ENSMUSG00000005881	34.6204	37.516	33.1242	34.4282	38.0179	36.6246	36.9026	37.1924	31.852
ENSMUSG00000005882	12.3627	5.47979	8.10813	10.3674	8.66413	8.86468	12.3125	11.0109	8.68641
ENSMUSG00000005883	0.538719	0.781623	0.665293	0.733892	0.642539	0.791092	1.99928	1.89518	1.55921
ENSMUSG00000005886	3.86053	5.49893	5.61474	3.76491	5.04491	5.1691	4.94407	7.28313	9.05172
ENSMUSG00000005893	1.7075	4.37316	3.08221	2.91501	4.42745	4.17623	2.80328	4.61381	3.84776
ENSMUSG00000005897	3.48556	2.6284	3.70628	5.21512	3.86644	4.30348	4.5297	4.92735	4.10186
ENSMUSG00000005899	4.40734	5.05028	5.04252	3.57918	3.40526	4.1223	3.02661	3.13492	3.76462
ENSMUSG00000005907	0.863136	0.82863	0.970832	0.851683	0.75679	0.890841	0.73824	0.991007	0.829359
ENSMUSG00000005936	9.33174	9.57412	9.19442	9.532	10.5039	9.93812	11.3405	11.7646	9.48046
ENSMUSG00000005947	0.0729811	0.044092	0.125773	0.0316094	0.042034	0.0397627	0.0230012	0.0285055	0.0271641
ENSMUSG00000005949	14.2894	15.5104	14.0104	23.9265	21.4326	21.7931	18.1221	16.3096	17.6455
ENSMUSG00000005950	0.060515	0.039077	0.078348	0	0.093568	0.214112	0.024602	0.043888	0.181977
ENSMUSG00000005951	3.67815	2.62507	2.78927	8.04823	7.70908	7.75058	6.46274	7.67792	6.06775
ENSMUSG00000005952	0.0140512	0.0477762	0.0243734	0.0211247	0.0121757	0.00637385	0.00874627	0.0217264	0
ENSMUSG00000005958	0.797464	0.935164	0.829504	1.69304	2.13595	2.04918	0.853084	1.18725	1.05601
ENSMUSG00000005968	17.9134	16.8362	17.8792	20.5499	19.859	19.6305	19.7008	18.404	17.0709
ENSMUSG00000005973	0	0.0408732	0	0	0	0	0.016046	0	0.0115872
ENSMUSG00000005980	0.124419	0.110483	0.188718	0.442664	0.157359	0.349136	0.300516	0.339246	0.377628
ENSMUSG00000005981	46.7248	48.8582	51.6048	51.7582	53.0122	51.8207	42.2123	44.5978	45.4979
ENSMUSG00000005982	3.37025	3.9171	3.39441	3.37655	2.5106	3.13273	3.33693	3.17862	4.08421
ENSMUSG00000005983	0.631936	0.631325	0.74176	0.619795	0.718914	0.366996	0.517082	0.479294	0.518288
ENSMUSG00000005986	1.58592	2.34946	2.3289	1.79393	2.14676	2.47791	1.02552	1.00794	0.481697
ENSMUSG00000005994	0	0	0	0.0184167	0	0	0.0183283	0	0
ENSMUSG00000006005	36.0024	48.9755	46.2949	38.1666	42.9238	46.0591	39.0118	48.7112	57.0779
ENSMUSG00000006007	0.0315451	0.0367975	0	0.0154923	0	0.0138425	0	0	0.0134561
ENSMUSG00000006010	8.78275	4.02814	9.09415	4.03561	7.93634	8.62015	3.83027	9.73154	4.60385
ENSMUSG00000006014	0.47838	0.399798	0.275126	0.188526	0.473647	0.258	1.00702	1.02021	1.06055
ENSMUSG00000006019	2.50047	3.284	2.37599	2.56011	2.96831	3.08141	3.20513	3.66715	3.90098
ENSMUSG00000006021	2.40602	1.84183	2.04813	2.0163	2.27542	2.16006	1.45316	1.62256	1.51057
ENSMUSG00000006024	30.1364	31.2395	28.4628	34.8918	33.4033	30.9126	34.4796	33.5247	36.8584
ENSMUSG00000006050	15.2379	14.9768	16.3937	15.5082	14.9632	12.9292	18.3147	17.2364	12.9416
ENSMUSG00000006056	0.894846	0.28376	0.875124	0.622131	0.507417	0.200756	0.031975	0.076776	0.055617
ENSMUSG00000006057	16.4413	12.1713	15.2449	10.6733	9.92481	10.8961	12.8145	12.7864	7.56516
ENSMUSG00000006058	22.8764	15.9399	18.067	19.4508	17.2517	16.3718	17.5854	14.3062	9.55168
ENSMUSG00000006095	23.818	16.148	21.2069	16.5372	17.2272	20.2653	14.4955	13.3312	10.8474
ENSMUSG00000006127	1.07672	1.72665	1.66411	1.67672	1.4873	2.38623	1.69023	1.89364	1.64319
ENSMUSG00000006134	13.1591	15.0266	13.8963	12.2574	13.3683	13.4089	12.6748	15.6307	13.3376
ENSMUSG00000006143	13.9639	13.6153	15.2283	15.911	17.2414	18.2289	14.1049	14.5136	13.2022
ENSMUSG00000006154	0.0475919	0.027977	0.0341466	0.10002	0.100167	0.0670043	0.025761	0.0211394	0.0803393
ENSMUSG00000006169	29.3041	31.2471	31.6582	26.7654	28.7548	28.6492	27.6521	28.9792	33.7863
ENSMUSG00000006179	0.334774	0.263361	0.266478	0.214404	0.20335	0.463092	0.858537	0.572142	0.237827
ENSMUSG00000006191	0.782661	0.665158	0.858258	0.725501	0.841584	0.818449	0.997998	1.10199	1.09365
ENSMUSG00000006204	0.0342505	0.0259428	0.0200495	0.000658125	0.0454135	0.0621621	0.00929672	0.0196263	0.0205902
ENSMUSG00000006205	4.97994	4.31652	3.20888	3.48572	3.36202	2.59386	3.9948	3.16785	2.27041
ENSMUSG00000006215	4.25577	5.07928	4.48436	3.78725	5.31884	5.6441	4.90534	5.18363	5.24258
ENSMUSG00000006216	0.0114668	0	0	0	0	0	0	0	0
ENSMUSG00000006218	0.390582	0.20881	0.624226	0.179169	0.343158	0.367855	1.32568	1.17632	1.21738
ENSMUSG00000006219	7.76973	18.8979	17.7519	8.11702	22.5035	23.6032	25.1342	26.6291	34.6985
ENSMUSG00000006221	0	0.123469	0.112322	0	0.028496	0.256707	0	0.075774	0.272239
ENSMUSG00000006235	0.146059	0.164191	0.112532	0.0785571	0	0.0348251	0.360662	0.0710624	0.190245
ENSMUSG00000006241	1.40247	1.12933	1.37367	0.82152	0.873678	1.44735	1.54356	1.43051	1.37725
ENSMUSG00000006262	3.65523	3.79618	3.95735	3.15794	3.38107	3.56334	3.00431	3.79004	3.08573
ENSMUSG00000006269	0.0241217	0	0	0	0	0	0	0.032624	0.0102893
ENSMUSG00000006273	35.5116	28.321	29.6689	31.1385	28.4046	26.3115	28.0619	24.8184	20.4468
ENSMUSG00000006276	8.36117	10.3016	9.60799	8.79837	10.5135	11.1394	6.93565	8.22733	11.3488
ENSMUSG00000006281	2.49172	3.24416	3.1134	2.59211	4.06101	3.63443	2.24804	3.70959	3.7437
ENSMUSG00000006288	4.92023	4.64959	4.35523	4.49126	5.36779	5.26454	5.02481	5.50785	4.12803
ENSMUSG00000006289	1.73929	1.40337	1.43319	1.50942	1.48276	1.19747	1.15144	0.968177	0.60087
ENSMUSG00000006299	40.0951	45.1152	45.1482	37.3565	42.4274	43.0996	42.388	46.4312	44.6165
ENSMUSG00000006301	8.78632	8.90921	10.65	12.9411	11.0157	16.1223	11.494	10.7411	13.6294
ENSMUSG00000006304	216.015	190.608	188.102	195.438	177.869	174.695	250.846	221.766	231.872
ENSMUSG00000006307	6.21239	9.13343	8.89375	5.69954	8.13166	7.74997	5.84391	9.51374	9.54292
ENSMUSG00000006310	0.485573	0.640586	0.813501	0.773703	0.742519	0.545844	0.522851	0.644932	0.379187
ENSMUSG00000006313	0.42118	0.809818	0.02278	0.135641	0.656862	0.347152	1.42312	1.13655	0.837942
ENSMUSG00000006315	62.0258	49.6693	54.0919	45.1718	41.4779	45.0807	44.2846	36.4532	26.6653
ENSMUSG00000006333	255.48	219.789	251.569	253.169	265.924	257.165	293.309	276.704	191.458
ENSMUSG00000006335	4.92111	7.80147	4.78926	5.14612	5.954	7.93733	5.60006	7.1497	5.59649
ENSMUSG00000006342	0.0613133	0.0496033	0	0.0303253	0.0761596	0.0135471	0.0266735	0	0.0768033
ENSMUSG00000006344	0.00882822	0	0.00757489	0	0	0	0	0	0
ENSMUSG00000006345	0.112744	0.206349	0.0394547	0.151331	0.0865819	0.0269416	0.0303907	0	0.0264306
ENSMUSG00000006356	80.2371	68.4143	74.8332	75.0981	113.855	73.2251	42.0928	32.8752	28.8417
ENSMUSG00000006360	8.02233	5.17123	6.28472	3.70959	4.24478	3.4529	0.170795	0.0642426	0.0881923
ENSMUSG00000006362	0.065728	0.0928841	0.10857	0.0768244	0.0724134	0.0830532	0.0992417	0.13955	0.17011
ENSMUSG00000006369	2.5335	2.7389	2.17952	2.77085	2.87391	2.9017	0.398478	0.699476	0.667665
ENSMUSG00000006373	50.3993	40.0425	42.3118	52.032	44.721	40.2941	63.0316	51.7424	42.6455
ENSMUSG00000006378	6.78136	5.69029	7.12702	4.38365	4.35942	4.1214	3.85248	4.33051	2.83624
ENSMUSG00000006386	0	0	0.0285275	0.0549166	0	0.0295586	0	0	0.0189982
ENSMUSG00000006390	35.1316	22.9933	22.4777	30.6122	29.1562	25.8301	23.7789	24.0693	34.5601
ENSMUSG00000006392	15.8153	12.7571	12.6133	12.9493	10.0756	11.7639	13.9053	12.0643	10.8541
ENSMUSG00000006395	6.03637	6.36767	5.74259	6.97824	8.16073	7.77024	9.94644	8.03718	6.467
ENSMUSG00000006398	85.4034	71.4898	73.143	64.7387	62.1936	60.3633	53.2562	47.6978	41.4828
ENSMUSG00000006403	31.2742	37.2182	39.5582	25.3997	30.3688	30.5255	18.2596	27.0114	22.1469
ENSMUSG00000006411	0.539909	0.510218	0.651198	0.358658	0.225555	0.414622	0.0823371	0.21501	0.144233
ENSMUSG00000006412	42.0313	40.051	37.5252	38.9802	34.7393	34.7784	58.1898	47.3249	48.826
ENSMUSG00000006418	28.5989	24.9019	25.8523	29.6505	27.1468	28.6229	48.6031	41.6377	45.7809
ENSMUSG00000006423	5.41557	5.1662	4.99628	5.18492	5.71837	1.47098	4.48052	5.08928	3.60017
ENSMUSG00000006435	4.84648	5.36504	5.15135	6.39493	6.86028	6.68939	7.09794	7.19501	6.38329
ENSMUSG00000006442	51.8691	45.6035	46.2011	40.083	38.9184	38.9137	39.0956	36.4687	42.2752
ENSMUSG00000006445	68.0538	76.9261	77.5117	82.545	96.5611	96.2591	100.465	123.416	123.841
ENSMUSG00000006456	17.0432	21.0595	23.5693	15.7001	15.9444	21.3555	7.08062	12.5239	12.2666
ENSMUSG00000006457	0.0817705	0.0959457	0.107048	0.0269304	0.0308992	0	0	0	0
ENSMUSG00000006462	0	0.0253739	0.0669539	0.0325138	0.0338173	0.0468171	0.0333504	0.0356578	0.0384565
ENSMUSG00000006463	4.22516	4.58381	5.02043	6.06495	4.62463	6.24745	5.38871	3.43492	2.3226
ENSMUSG00000006464	0.103524	0.0641339	0.16515	0.115212	0.116746	0.176916	0.180387	0.121563	0.229994
ENSMUSG00000006469	0.0116167	0	0.0303583	0	0	0	0	0.0899344	0.00932728
ENSMUSG00000006471	1.82942	2.37115	2.43862	1.86868	2.40411	2.33174	3.05954	2.67285	2.84803
ENSMUSG00000006476	1.79777	2.72144	3.71532	2.6052	2.50787	2.50328	2.23873	2.64135	4.23151
ENSMUSG00000006494	8.19582	8.48722	8.97144	7.4957	7.36337	8.16089	14.4149	15.8459	12.4663
ENSMUSG00000006498	62.7392	96.314	94.2197	58.73	71.2223	74.5856	48.2713	65.087	91.3391
ENSMUSG00000006517	6.01093	5.76558	5.71602	2.26444	3.22316	3.44092	1.43511	1.66053	1.87494
ENSMUSG00000006519	2.78558	1.29018	1.1837	1.93373	1.63357	1.51716	0	0	0
ENSMUSG00000006522	0.0653075	0	0	0.173069	0	0	0.0351167	0	0
ENSMUSG00000006526	1.7474	1.46135	1.69535	1.67918	2.33154	1.8311	1.50306	1.58099	1.37669
ENSMUSG00000006527	2.28864	2.03934	2.50411	2.41865	2.30086	2.54745	2.52902	3.29177	2.51634
ENSMUSG00000006529	0	0	0	0.0536639	0	0	0.0929428	0	0
ENSMUSG00000006538	8.32131	7.74936	9.3561	3.46599	4.51502	4.73574	1.5601	1.94683	1.92285
ENSMUSG00000006542	0	0.00557786	0	0	0	0	0.0475895	0.0346547	0.0470304
ENSMUSG00000006546	0	0	0	0	0	0	0.106606	0.167715	0
ENSMUSG00000006567	0.054586	0.046857	0.007435	0.035359	0.020645	0	0.023589	0.148451	0.110557
ENSMUSG00000006574	0	0	0	0	0	0	0	0	0.0368655
ENSMUSG00000006575	3.69935	4.74041	4.05033	3.85922	5.14751	3.37187	9.52221	9.95948	10.1655
ENSMUSG00000006576	0.330925	0.250088	0.410959	0.299413	0.280501	0.416753	0.324474	0.431404	0.416463
ENSMUSG00000006585	15.4141	17.4972	18.4361	17.8373	17.273	18.9954	16.9606	18.1744	24.6923
ENSMUSG00000006587	0.572326	0.897519	0.807254	0.736837	0.282441	0.23889	0.170286	0	0.027396
ENSMUSG00000006589	137.323	147.624	153.958	120.583	143.602	129.028	106.937	91.8486	89.5392
ENSMUSG00000006599	46.5168	42.9702	44.4992	45.3139	42.298	41.1427	41.9548	39.1245	40.4928
ENSMUSG00000006611	0.249492	0.177391	0.517933	0.423767	0.339738	0.402951	0.91508	0.695392	0.454284
ENSMUSG00000006638	0.666185	0.314229	0.508969	0.549675	0.166772	0.56357	0.427528	0.558332	0.733542
ENSMUSG00000006641	1.42708	1.35357	1.13909	0.545454	1.05752	0.74094	0.711872	0.842317	0.783082
ENSMUSG00000006642	0	0	0	0	0	0	0.009856	0	0.032855
ENSMUSG00000006649	4.21366	0.332719	1.328	1.18758	0.34662	5.43108	1.54247	0.333319	0.497407
ENSMUSG00000006651	2.17741	2.04838	2.14931	2.12329	2.76094	2.99013	1.03856	0.947647	1.0205
ENSMUSG00000006673	6.4964	6.17954	5.86213	7.32367	5.26913	6.19614	7.88396	7.50789	6.83123
ENSMUSG00000006675	0.0407495	0.0382942	0.0331344	0.0347527	0.0115216	0.0462515	0.026367	0	0.0083394
ENSMUSG00000006676	8.92859	10.0213	10.5867	9.57717	11.7596	11.3011	10.9293	13.3074	11.1306
ENSMUSG00000006678	5.48244	6.1513	6.27043	6.28245	5.98541	6.45895	6.61594	7.54307	6.52833
ENSMUSG00000006699	93.3296	75.7436	74.5491	84.463	72.4835	66.7789	82.3115	61.9653	71.68
ENSMUSG00000006705	3.03454	3.51232	3.3728	1.18009	3.41023	3.22467	3.91708	4.88899	4.40544
ENSMUSG00000006711	0.00987342	0	0	0	0	0.00882057	0	0	0
ENSMUSG00000006715	36.1579	26.0379	27.9623	33.3409	26.6838	25.9931	30.0519	22.6065	21.2126
ENSMUSG00000006717	33.4908	22.4753	25.5797	25.0378	18.8098	18.2933	25.738	16.8466	17.2308
ENSMUSG00000006720	0.722353	0.837881	0.847126	0.939961	0.865204	0.61696	0.555185	0.490386	1.20058
ENSMUSG00000006724	0.0607884	0.0826178	0.191034	0.075622	0.0522369	0.277949	0.562802	0.611063	0.886117
ENSMUSG00000006728	160.158	145.024	126.083	131.387	124.648	117.253	125.173	104.558	125.04
ENSMUSG00000006731	39.7124	47.8513	41.2035	38.9759	43.5438	44.393	26.3072	29.1575	46.3048
ENSMUSG00000006732	6.29979	7.75164	7.3838	7.18605	7.8504	7.23306	12.608	17.6353	20.2587
ENSMUSG00000006736	47.0442	45.3775	50.1405	54.9234	49.6187	53.0739	94.5886	83.8922	88.2698
ENSMUSG00000006740	19.6054	22.8985	23.614	21.8621	24.928	24.9018	20.3547	24.8699	22.5252
ENSMUSG00000006763	2.41553	2.08757	2.18106	2.19061	1.87928	2.10863	1.81552	1.788	1.48244
ENSMUSG00000006764	0.106306	0	0.0623271	0	0	0.113148	0.0897629	0	0.031315
ENSMUSG00000006777	28.2062	25.0137	24.0426	24.334	24.2786	22.2363	0.606757	1.22973	1.29443
ENSMUSG00000006782	0.0138042	0	0	0	0.0245455	0.0904174	0	0.0121165	0.0245998
ENSMUSG00000006784	0	0	0.0326864	0.0169463	0.0036201	0	0.00929726	0.0276773	0.128925
ENSMUSG00000006800	39.8108	48.2407	44.6419	44.7375	52.8549	51.0382	28.1569	34.1471	41.2041
ENSMUSG00000006818	3.32464	3.74027	4.09802	3.42358	2.1177	2.8235	3.28412	3.22052	2.72038
ENSMUSG00000006850	1.83156	1.50391	1.38562	1.95146	2.03825	2.74814	1.9226	2.35971	1.78417
ENSMUSG00000006906	1.44765	1.88068	1.78572	2.60306	1.83758	1.72773	2.06253	1.33223	2.45118
ENSMUSG00000006920	3.69809	3.56026	4.03096	4.64159	4.28104	4.65398	4.83348	5.62286	5.18136
ENSMUSG00000006930	0.921089	1.16049	1.18286	1.20474	0.544284	0.537555	2.20153	1.46804	1.7544
ENSMUSG00000006931	0.021126	0	0	0.070646	0.10289	0	0.073165	0	0
ENSMUSG00000006932	77.846	63.1738	72.5805	86.7666	81.6488	80.812	71.0704	69.5024	54.3822
ENSMUSG00000006941	7.84939	8.28117	7.6503	7.57778	6.81388	4.99327	17.4387	14.4582	13.1098
ENSMUSG00000006958	0.332117	0.243013	0.217194	0.429895	0.325501	0.572932	1.25317	1.52132	1.19125
ENSMUSG00000006998	72.004	62.1709	72.6032	63.2628	61.3497	61.8269	45.8749	46.0269	34.6725
ENSMUSG00000007021	0.761087	0.846504	0.488275	0.55369	0.585147	0.112035	0.545124	0.447594	0.152132
ENSMUSG00000007029	34.9303	38.8889	40.2604	33.4645	41.183	41.4388	26.1346	31.8619	28.9495
ENSMUSG00000007030	0.23059	0.121934	0.062107	0.108386	0.200572	0.152207	0.144221	0.068961	0.157669
ENSMUSG00000007033	1.16043	0.571758	0.945128	1.22343	1.36345	0.776691	0.951011	0.738059	1.0738
ENSMUSG00000007034	0.64954	0.405018	0.776444	0.645704	1.03519	0.44124	0.175769	0.082004	0.157859
ENSMUSG00000007035	0.297494	0.139606	0.089864	0.328934	0.279131	0.401034	0.323169	0.186002	0.446653
ENSMUSG00000007036	5.94613	6.93578	5.48603	4.85093	5.40247	4.30985	4.80557	5.0175	5.65214
ENSMUSG00000007038	19.2659	17.4501	18.4479	14.3915	14.6345	14.3011	13.4556	12.0582	12.5376
ENSMUSG00000007039	1.28299	1.29637	1.84393	1.5981	2.49585	1.6229	0.696278	0.440312	0.778417
ENSMUSG00000007041	155.832	129.25	141.454	148.133	141.463	138.349	162.954	143.322	123.495
ENSMUSG00000007050	10.1384	11.7136	9.5101	9.07573	7.98505	6.76501	7.63494	7.22111	9.88134
ENSMUSG00000007080	4.26025	6.37208	5.90311	4.33967	5.34234	5.8893	3.25703	4.81562	5.25776
ENSMUSG00000007097	7.0426	7.40738	7.64465	10.7144	11.7055	11.1605	2.13162	2.63803	2.23643
ENSMUSG00000007107	0.014409	0.0593723	0	0.0390207	0	0	0	0	0.0178335
ENSMUSG00000007122	0.973077	0.822711	1.04531	0.498319	0.67024	0.574188	0.365208	0.2684	0.408729
ENSMUSG00000007207	10.7049	10.3087	10.1003	10.6046	11.7862	10.3068	12.3167	14.2623	13.0554
ENSMUSG00000007209	0.0374476	0	0	0	0	0	0	0	0
ENSMUSG00000007216	0.0249	0	0	0.0603673	0.0528027	0.0219304	0.226129	0.0950664	0.197125
ENSMUSG00000007279	0	0.0419397	0.0324056	0.0245086	0	0	0	0	0
ENSMUSG00000007338	29.2062	30.6375	26.855	27.7481	22.109	22.626	24.8735	23.64	20.9341
ENSMUSG00000007379	1.10053	1.06077	1.42999	1.40295	1.55676	1.65236	1.62916	1.91358	1.05598
ENSMUSG00000007411	7.72281	8.49166	7.21982	8.37113	8.10791	8.42957	5.32463	5.92989	5.95128
ENSMUSG00000007415	17.8339	13.0791	14.5239	16.6016	13.3363	17.4728	15.6456	15.3275	10.9835
ENSMUSG00000007458	41.2445	42.0792	38.5681	34.438	34.7073	30.8536	34.8643	35.6427	36.1761
ENSMUSG00000007476	5.73093	9.13431	9.3897	7.35757	10.0441	10.207	5.50631	6.52193	9.40143
ENSMUSG00000007480	0.03336	0.144996	0	0	0	0	0	0	0
ENSMUSG00000007564	58.3175	56.2464	54.3827	53.3066	52.0308	52.6917	48.0739	45.6875	49.6608
ENSMUSG00000007570	2.03296	1.80267	2.0798	2.27892	1.83739	2.58111	2.15249	2.48746	2.00215
ENSMUSG00000007589	3.73036	5.11432	3.46225	4.99175	4.75253	6.00794	7.15197	6.57016	6.75547
ENSMUSG00000007591	0.295418	0.153098	0.527942	0.328995	0.306345	0.274217	0.219737	0.214693	0.0262533
ENSMUSG00000007594	0.189737	0.274057	0.157636	0.0660851	0.159302	0.162737	0.279665	0.349398	0.466158
ENSMUSG00000007603	7.21985	8.50324	7.32436	6.70538	6.28599	7.80788	6.30618	8.04539	6.91928
ENSMUSG00000007610	5.94785	5.23088	6.85827	5.30513	7.39771	7.10788	4.8717	4.48883	3.25243
ENSMUSG00000007613	8.79593	8.65095	9.42429	7.23196	8.39786	7.43889	8.13147	8.58484	6.45537
ENSMUSG00000007617	1.0908	1.12316	1.4041	1.09644	1.11285	1.02289	0.96866	1.06177	0.991439
ENSMUSG00000007646	0.447644	0.270412	0.307592	0.376741	0.601861	0.240611	1.12629	0.837705	1.00248
ENSMUSG00000007653	0	0	0.00702842	0	0	0	0	0	0
ENSMUSG00000007655	0.0152346	0	0.0651282	0	0.0886669	0.134694	0	0.0246996	0.0654894
ENSMUSG00000007656	17.9462	13.0196	14.9282	16.4859	13.2352	13.3813	15.1066	12.9234	8.76771
ENSMUSG00000007659	18.644	45.1099	19.325	42.9285	48.8427	44.0949	14.4422	36.5344	11.2336
ENSMUSG00000007670	18.254	22.1768	26.2126	15.4582	23.3063	25.648	16.7574	23.5904	25.9989
ENSMUSG00000007682	0.085203	0.182405	0.192836	0.03147	0.01897	0.016005	0	0	0
ENSMUSG00000007721	48.8944	53.0394	43.9942	38.1762	38.3324	34.1227	23.0438	20.0978	25.5788
ENSMUSG00000007739	84.3568	67.7934	66.539	80.1147	68.9809	77.2085	102.028	83.5743	66.1843
ENSMUSG00000007777	15.4934	12.915	14.3944	14.5671	10.0118	11.6654	11.1607	9.26522	8.84641
ENSMUSG00000007783	3.78108	4.63292	4.0832	3.62278	5.00479	4.96737	3.27109	4.22443	4.27388
ENSMUSG00000007805	4.23336	4.11169	4.72007	4.652	2.80583	3.16913	5.68896	4.51557	5.04655
ENSMUSG00000007812	15.654	15.1	12.8568	19.8654	19.2826	18.9697	15.8632	17.0865	15.8593
ENSMUSG00000007815	58.8456	46.1672	49.03	56.6278	47.1744	47.0036	59.5088	45.2385	45.0758
ENSMUSG00000007817	2.47294	3.5874	3.49933	2.44486	3.44527	3.65487	2.45028	3.40712	5.41785
ENSMUSG00000007827	6.66705	9.12573	9.09122	5.84118	7.96514	7.37931	2.79943	3.97362	3.3264
ENSMUSG00000007833	2.8392	3.03469	2.67638	2.43356	3.28995	3.57018	2.4959	2.52329	1.84078
ENSMUSG00000007836	74.3127	58.7399	69.8961	65.1616	58.1455	64.3422	76.1735	83.6275	51.4474
ENSMUSG00000007837	3.07949	3.4558	3.21226	3.64174	2.857	3.20051	1.76884	3.34922	2.66922
ENSMUSG00000007850	50.2624	52.4381	49.7913	53.096	54.0591	52.2519	44.3949	48.5906	44.1402
ENSMUSG00000007867	10.0216	10.479	11.7703	12.9118	9.67322	11.8039	8.92699	8.45182	6.64665
ENSMUSG00000007872	46.5252	37.0109	41.7823	52.5964	49.5913	51.6526	72.6769	68.6993	48.5185
ENSMUSG00000007877	0.034875	0.22966	0.495701	0.05494	0.235055	0.815322	0.073926	0.089732	0.282286
ENSMUSG00000007880	7.09639	10.7108	10.1182	7.31536	9.76893	10.5969	7.58118	11.4089	13.8357
ENSMUSG00000007888	25.8815	24.7312	23.7733	40.7839	45.7083	43.7013	17.6365	19.0251	19.4732
ENSMUSG00000007891	227.51	242.534	223.207	273.096	277.075	271.489	151.49	158.639	138.8
ENSMUSG00000007892	1223.33	957.368	1075.16	1222.85	1060.86	1119.73	1338.49	1179.3	870.505
ENSMUSG00000007908	0.0715661	0.0079911	0.0329307	0.00955819	0.0264134	0.0170809	0.0189909	0.0624447	0.0165453
ENSMUSG00000007944	0.032809	0	0.02203	0.094744	0.091015	0	0	0.121983	0.075908
ENSMUSG00000007946	0.238656	0.0427945	0.24109	0.27042	0.451595	0.171187	0.0690131	0.113266	0.14493
ENSMUSG00000007950	12.0428	11.5415	12.0247	11.1003	11.9129	11.8274	6.76169	6.37686	5.57815
ENSMUSG00000007987	5.76898	5.42322	4.77669	5.74114	6.7053	5.95248	2.86989	2.85318	2.66295
ENSMUSG00000008028	0.0143779	0.0507797	0	0	0.0159747	0	0	0	0
ENSMUSG00000008035	62.4348	62.2416	64.1644	52.8019	26.855	58.4053	25.8892	33.9995	68.685
ENSMUSG00000008036	59.7708	56.3841	53.575	49.9145	42.6253	41.9442	30.0271	31.5503	25.9825
ENSMUSG00000008090	1.97367	1.42158	2.23623	3.29304	3.69986	4.32644	5.38179	6.6046	6.20906
ENSMUSG00000008129	1.37346	1.89152	1.80444	1.62548	1.47546	1.35267	0.586608	0.880621	0.872992
ENSMUSG00000008136	1.37037	0.860851	1.53011	1.76813	2.15215	2.55526	5.30045	3.73114	3.79655
ENSMUSG00000008140	14.5026	12.4101	14.9424	15.448	26.8532	15.6471	18.756	10.6588	6.89263
ENSMUSG00000008153	10.3283	11.7611	12.5849	10.6744	10.3212	10.9956	7.9706	8.72768	8.58556
ENSMUSG00000008167	9.28108	8.20261	9.35465	7.31711	8.28057	8.87871	3.94473	4.79719	3.57372
ENSMUSG00000008193	0.0368467	0.0303647	0.046596	0.0725133	0.0156276	0	0.144578	0.132829	0.062869
ENSMUSG00000008200	10.6894	12.5121	11.7674	11.424	11.2669	11.03	11.9368	12.4425	16.4878
ENSMUSG00000008206	0	0.00355081	0	0	0	0.00379494	0.00422605	0	0.0073513
ENSMUSG00000008226	6.55503	5.40589	5.7334	7.18536	6.80337	4.83664	5.4423	6.21339	4.55565
ENSMUSG00000008301	35.1095	33.847	30.6719	29.9138	26.5385	30.0916	29.8869	28.288	23.8853
ENSMUSG00000008305	2.00716	2.11931	2.20604	1.77322	1.69449	2.08995	2.39904	2.86904	2.84646
ENSMUSG00000008307	0.116373	0.532292	0.49322	0.408997	0.327171	0.242389	0.579835	0.664096	0.944721
ENSMUSG00000008318	2.13991	1.76951	2.10751	1.79542	1.77162	1.89294	2.1953	2.58025	2.77688
ENSMUSG00000008333	41.842	31.6666	33.1241	33.6518	23.8702	22.9671	31.4987	21.8988	19.5948
ENSMUSG00000008348	175.44	189.173	182.354	167.776	175.727	178.974	177.863	190.211	206.898
ENSMUSG00000008373	18.9644	18.0637	17.4061	17.7304	14.4746	14.9537	10.6047	9.46817	9.23401
ENSMUSG00000008384	16.6706	15.5321	15.4818	18.4885	14.9223	15.2239	24.5388	22.5776	21.1869
ENSMUSG00000008393	72.9471	62.5232	64.3874	92.9741	84.0148	86.6228	109.094	105.319	86.9897
ENSMUSG00000008398	10.4006	10.7385	10.3007	14.0895	14.597	14.2884	13.0173	14.6801	18.8285
ENSMUSG00000008429	6.50223	6.04897	6.96149	7.46718	8.83037	7.01179	7.0729	7.74815	7.57737
ENSMUSG00000008435	4.71816	4.72771	5.1089	3.95084	4.19221	4.00584	4.61934	4.9683	4.06221
ENSMUSG00000008438	0	0	0.154105	0.080388	0.127901	0.217544	0.024813	0.079435	0.077426
ENSMUSG00000008450	60.8145	72.0006	39.4371	56.8702	51.6478	52.9505	37.1318	41.6261	41.538
ENSMUSG00000008461	0	0	0	0.0373896	0	0	0.0713371	0.139006	0.0808996
ENSMUSG00000008475	82.5011	56.8715	59.1173	75.52	59.5056	68.4492	74.7604	69.8701	39.7617
ENSMUSG00000008482	0.219025	0.419038	0.373283	0.184313	0.152631	0.076803	0.0869	0.260894	0.111969
ENSMUSG00000008489	0	0	0	0	0	0.0111962	0	0	0
ENSMUSG00000008496	0.352246	0.404525	0.440052	0.369203	0.412164	0.466978	0.231237	0.369106	0.3426
ENSMUSG00000008540	20.8869	16.4829	15.9652	20.8401	17.2883	13.5471	19.7095	16.5133	12.7932
ENSMUSG00000008575	4.98731	6.03441	5.91976	4.68865	6.10517	6.87175	2.89869	3.45945	3.66885
ENSMUSG00000008590	0	0	0	0	0	0	0	0	0.046412
ENSMUSG00000008601	0.337133	0.087606	0.139736	0.0401256	0.145738	0.0324067	0.12862	0.290396	0.33348
ENSMUSG00000008604	31.0158	33.6543	32.0134	28.2434	32.2593	30.0656	27.0717	31.8723	36.0282
ENSMUSG00000008668	207.172	160.919	187.399	207.217	193.695	178.403	316.911	270.513	180.27
ENSMUSG00000008682	223.179	164.137	187.206	218.176	207.181	195.492	377.402	321.384	184.197
ENSMUSG00000008683	99.3913	53.9076	59.8346	96.0769	64.0142	64.1961	150.876	92.8461	60.9018
ENSMUSG00000008690	24.7836	25.9909	26.1638	23.9425	27.1271	26.7485	16.607	16.3704	16.2721
ENSMUSG00000008730	10.3974	13.7942	12.7766	12.4104	13.8758	15.2828	11.5617	15.2168	16.3242
ENSMUSG00000008734	29.5725	30.2884	26.4561	29.7884	33.7067	29.5558	18.8043	17.1646	20.3271
ENSMUSG00000008763	18.989	21.6623	19.5163	19.6209	19.8246	19.6583	13.7707	13.5341	13.583
ENSMUSG00000008822	2.60135	2.93877	2.11321	2.45262	2.57271	1.9133	4.06597	3.38864	2.34899
ENSMUSG00000008845	0	0	0.0328585	0.0190746	0	0.0255643	0.0156746	0	0.0158129
ENSMUSG00000008855	0.780712	1.19482	1.07693	1.53961	2.14752	1.91391	4.40284	4.4674	4.87556
ENSMUSG00000008859	31.3145	28.017	26.6804	34.1641	29.7276	27.4604	32.42	28.2396	29.2572
ENSMUSG00000008892	36.1323	24.5827	27.1395	28.6282	23.5054	24.2756	29.4046	24.5883	17.7312
ENSMUSG00000008932	0.0471777	0.176889	0.0575957	0	0	0	0.0603154	0.0746532	0.0778392
ENSMUSG00000008958	13.4319	14.8978	11.9985	12.9432	11.9917	12.2007	11.8205	10.9416	13.7344
ENSMUSG00000008976	14.846	17.242	17.3395	17.0826	16.5172	17.4037	11.7741	11.5222	13.3292
ENSMUSG00000008999	2.50765	3.86394	3.43078	3.8574	4.37522	5.55458	13.1802	14.6903	19.9169
ENSMUSG00000009013	33.3102	33.6278	27.6028	41.1465	24.3302	24.368	25.0922	21.5187	27.169
ENSMUSG00000009030	12.4772	9.86983	9.55253	10.0016	11.1041	10.1772	12.3896	15.7219	9.73067
ENSMUSG00000009035	16.3298	18.913	16.3115	5.58078	23.199	20.9007	16.4062	18.2724	5.65325
ENSMUSG00000009070	0	0	0	0.011528	0	0	0.0172083	0.0227364	0
ENSMUSG00000009073	12.4085	16.2343	17.066	13.0242	15.978	14.3666	9.78183	11.967	12.2136
ENSMUSG00000009075	0	0.023359	0	0.079615	0.051183	0	0	0.0176	0
ENSMUSG00000009076	5.72778	4.38155	4.82612	3.88405	4.51275	5.00187	3.32608	3.32455	4.40709
ENSMUSG00000009079	47.6788	59.5581	52.4681	50.1185	53.5549	54.0244	47.2852	49.4173	61.7002
ENSMUSG00000009090	13.4853	15.1775	15.6294	13.8045	17.1564	17.5322	12.1438	15.0578	15.0682
ENSMUSG00000009092	0	0.116104	0.0673679	0.0760072	0	0.0648032	0.0996928	0.125867	0
ENSMUSG00000009108	0.931853	0.681988	0.352742	0.899462	0.545839	0.367015	1.2915	0.672481	0.742854
ENSMUSG00000009112	9.27785	10.6093	10.7403	9.22424	10.3358	10.951	10.8131	11.8215	10.6635
ENSMUSG00000009114	0	0	0	0	0	0.0136471	0	0.0342601	0
ENSMUSG00000009145	1.65448	1.90347	2.22765	2.46689	3.06373	2.51337	1.67289	2.34494	2.68888
ENSMUSG00000009185	0.264259	0	0.175577	0	0.219271	0.50561	0	0	0
ENSMUSG00000009207	4.20521	3.9006	4.43959	3.95221	3.18251	3.01192	4.50502	3.40715	4.36942
ENSMUSG00000009210	0.292918	0.837003	0.370947	0.634614	0.319018	0.714699	0.410002	0.237936	0.269296
ENSMUSG00000009214	0.0349689	0	0	0	0	0	0	0	0
ENSMUSG00000009246	0	0.018845	0	0.0356978	0.0645795	0.0287663	0.0385377	0.00600408	0.018731
ENSMUSG00000009248	0	0	0.0274455	0	0	0	0	0	0
ENSMUSG00000009281	0.11783	0	0	0.23949	0	0.0540243	0.0536671	0	0.0376316
ENSMUSG00000009291	7.58257	24.0851	9.64284	9.36475	11.3028	12.3612	10.474	33.6039	6.84983
ENSMUSG00000009292	0.00848195	0	0.00798745	0	0.00359759	0.00747028	0.0148856	0.034138	0
ENSMUSG00000009293	12.6231	21.2743	14.8776	13.2815	13.4257	33.0674	29.5518	22.1034	24.7919
ENSMUSG00000009350	0.163816	0.378576	0.335538	0.0583409	0.0654482	0.246483	0	0	0
ENSMUSG00000009356	0.0168546	0.0123993	0	0	0	0	0	0	0
ENSMUSG00000009376	8.61796	10.4313	10.2223	7.76354	10.4178	10.2199	9.86782	11.8752	13.9487
ENSMUSG00000009378	0.0988706	0.187663	0.112071	0.0874307	0.0968451	0.262804	0.202769	0.28746	0.225029
ENSMUSG00000009394	0	0.0116881	0.0255216	0.0148152	0	0	0.0144063	0	0
ENSMUSG00000009406	2.86988	3.59525	3.38246	3.16021	3.48757	3.3079	3.16452	3.36855	4.31975
ENSMUSG00000009418	1.86841	2.76617	2.8819	1.98716	2.86963	2.96961	2.33616	3.71858	5.42668
ENSMUSG00000009470	14.1869	17.447	33.3385	12.8005	33.3751	31.5592	11.4062	17.4793	38.1468
ENSMUSG00000009487	0.0102119	0.00420779	0	0	0	0	0	0	0
ENSMUSG00000009535	9.0435	7.32505	8.11716	9.37842	8.66027	9.2612	11.1325	10.014	6.43657
ENSMUSG00000009549	47.887	26.2107	25.6037	26.6868	24.542	21.1062	38.9415	51.7928	26.0613
ENSMUSG00000009555	13.738	12.9017	14.3404	13.6637	13.3679	12.3901	12.2635	11.7886	11.3558
ENSMUSG00000009563	6.50165	6.37488	4.35591	3.66132	5.91429	7.3405	4.23076	6.45652	6.81313
ENSMUSG00000009566	7.14512	8.19491	8.45838	6.82947	6.25774	6.78357	9.12633	9.56722	10.0141
ENSMUSG00000009569	2.25688	5.20087	4.93632	3.84404	5.27054	4.89354	1.96846	4.72654	6.14704
ENSMUSG00000009575	41.5709	49.7934	53.7065	39.5377	47.2093	49.7325	35.2442	44.2864	38.2893
ENSMUSG00000009585	4.60719	4.67918	4.18481	3.39149	3.737	3.64005	1.79055	2.10426	2.70332
ENSMUSG00000009596	0	0	0	0	0	0.0829149	0.0230066	0.00624157	0.067519
ENSMUSG00000009614	0.818526	0.705147	1.53883	0.979942	1.01262	1.33944	1.98739	2.94834	2.48133
ENSMUSG00000009621	1.86346	1.86785	2.18165	1.6966	1.92897	2.03213	2.02581	2.62986	2.48177
ENSMUSG00000009630	105.532	80.8395	86.196	82.6091	76.4359	72.9315	117.782	101.139	85.1541
ENSMUSG00000009633	0.179643	0.14945	0.287262	0.179181	0.614584	0.106857	0.354743	0.659062	0.155261
ENSMUSG00000009640	7.64456	6.84446	7.41847	5.72537	5.62991	6.45464	5.29877	4.74929	4.64032
ENSMUSG00000009647	4.19081	4.16684	3.91703	4.65845	4.49479	4.55389	5.9306	6.0626	5.95339
ENSMUSG00000009654	0.0743408	0	0.0160905	0.177275	0.144058	0.20024	0.453055	0.31215	0.315287
ENSMUSG00000009670	0.0291601	0	0.127819	0.014372	0	0	0	0	0
ENSMUSG00000009681	5.30989	6.54133	6.3848	6.21205	7.25286	7.53633	6.41317	7.90103	8.66312
ENSMUSG00000009687	18.9152	19.2678	17.7195	24.3794	20.6097	20.818	16.3721	15.2982	27.4687
ENSMUSG00000009731	0.399939	0.655377	0.511258	0.495753	0.577644	0.608576	0.982705	1.1823	1.5374
ENSMUSG00000009733	1.65337	1.09799	1.82713	1.07505	1.9723	2.06698	1.96002	1.88608	1.35839
ENSMUSG00000009734	0	0	0	0.0111847	0	0	0	0	0
ENSMUSG00000009739	0.728605	0.858927	0.878073	1.25665	2.24222	1.67462	1.52252	1.65574	2.33923
ENSMUSG00000009741	7.42239	8.5899	8.85842	9.28377	9.23275	8.15262	7.61405	8.9989	8.99047
ENSMUSG00000009772	8.72992	9.21861	8.94399	9.06262	8.62617	8.72467	6.0154	6.18126	5.71378
ENSMUSG00000009828	1.01353	1.14729	0.841933	0.99414	1.17588	0.969265	0.772142	0.694857	1.1177
ENSMUSG00000009863	25.2648	20.2822	21.648	21.0067	19.6074	19.8868	23.8731	23.9417	15.6008
ENSMUSG00000009876	0.0984815	0.0739186	0	0.0660956	0.0274156	0.0888883	0	0	0
ENSMUSG00000009894	12.2966	10.9099	12.1774	13.1732	11.8048	13.2863	18.9434	14.6785	13.9096
ENSMUSG00000009900	0.018935	0	0	0	0.015947	0	0	0	0
ENSMUSG00000009905	5.92681	6.84046	6.55922	7.27934	7.56376	7.11846	4.04224	4.89406	3.75314
ENSMUSG00000009907	18.4312	13.1875	15.863	17.7649	14.662	15.5984	20.6065	18.3395	16.6844
ENSMUSG00000009927	124.796	71.003	79.9694	107.523	77.6307	108.44	139.144	136.492	54.6529
ENSMUSG00000009941	0	0	0.0524063	0	0	0.0880555	0	0	0
ENSMUSG00000009995	2.74988	1.86688	2.35338	3.3652	2.87565	3.82626	4.08019	2.75646	2.55654
ENSMUSG00000010021	0.0466772	0.0856774	0	0.0125404	0	0	0	0	0
ENSMUSG00000010025	53.8763	47.9479	50.0159	50.8535	49.299	45.1055	32.6943	29.5652	27.9469
ENSMUSG00000010044	0.0993457	0	0.189638	0.114293	0.118354	0.0758511	0.0702798	0.0533722	0.143951
ENSMUSG00000010045	12.6935	12.6791	14.0555	10.9954	10.7623	13.4457	14.4942	12.7135	14.745
ENSMUSG00000010047	5.52653	9.83119	7.30623	6.16944	4.78062	5.7469	4.94377	5.92758	5.82085
ENSMUSG00000010048	15.1448	14.474	18.4752	12.9915	12.0585	13.8981	14.8123	13.2458	12.1446
ENSMUSG00000010051	3.91211	5.60232	3.76464	6.50381	6.86272	7.16426	3.74893	3.82761	6.34593
ENSMUSG00000010054	7.94548	6.41429	6.61808	7.50787	6.6823	6.85632	7.6132	6.28527	6.69132
ENSMUSG00000010057	3.18169	3.32306	2.04856	2.48083	1.64078	2.16171	2.7165	2.51302	3.65046
ENSMUSG00000010064	0.146061	0.0740898	0.0460357	0.104712	0	0.0691519	0.0716602	0.0321268	0.0251758
ENSMUSG00000010067	6.39987	5.42052	6.08915	7.31258	7.13085	7.06317	10.4062	10.7727	8.47203
ENSMUSG00000010080	7.8589	9.679	9.14769	9.07286	9.84104	9.05284	8.55341	8.74988	9.27662
ENSMUSG00000010086	0.0129945	0	0	0.0132765	0.0113846	0	0	0.0650515	0
ENSMUSG00000010095	53.3618	51.7937	50.3795	64.1296	63.6969	60.5236	123.451	124.1	136.76
ENSMUSG00000010097	27.7471	25.9282	22.9074	22.1004	18.6911	21.5162	26.1346	21.012	22.5409
ENSMUSG00000010110	2.77525	2.55789	2.80758	2.42173	2.00836	3.71679	3.06331	2.9811	3.73962
ENSMUSG00000010122	0.299187	0.325732	0.280679	0.242547	0.181308	0.362582	0.114423	0	0
ENSMUSG00000010142	0	0	0	0	0.0158038	0.0164094	0	0	0
ENSMUSG00000010154	16.5673	15.9668	13.6289	18.7333	17.1602	18.9839	15.4764	15.435	17.9474
ENSMUSG00000010175	0.860883	1.08605	1.15627	0.732018	0.719035	0.750648	0.966719	1.32443	1.25607
ENSMUSG00000010205	34.4662	42.5789	40.4858	30.9117	36.5334	35.2687	30.9898	16.6215	51.2858
ENSMUSG00000010277	34.7522	49.4793	47.1837	36.818	48.6185	47.828	23.0461	31.638	31.221
ENSMUSG00000010290	11.2731	8.45915	9.84012	11.6895	11.3792	11.9913	7.81828	6.64165	4.46747
ENSMUSG00000010307	2.89499	2.76841	2.0239	4.57834	6.1262	4.22926	6.37424	5.96966	6.29744
ENSMUSG00000010311	0	0	0	0	0	0	0.0192072	0	0
ENSMUSG00000010342	0.0728367	0.267718	0.0257101	0.0359182	0.150524	0.118606	0.0970088	0.155708	0.159198
ENSMUSG00000010358	8.82544	7.36502	9.68093	9.761	8.25084	9.27727	6.44815	5.90714	4.76741
ENSMUSG00000010362	13.6764	11.8357	11.996	15.2614	12.4977	13.2777	24.0433	21.2442	14.2156
ENSMUSG00000010376	73.2638	41.2338	38.3458	44.737	33.5137	49.8001	51.3995	30.6345	34.9223
ENSMUSG00000010392	11.2078	11.6637	12.1019	11.2445	11.6547	11.6107	12.2981	14.1839	13.6602
ENSMUSG00000010406	20.9059	18.9913	19.5522	18.9456	15.9016	15.2631	32.5593	25.7706	19.0366
ENSMUSG00000010435	0	0	0	0	0	0.105724	0	0	0
ENSMUSG00000010453	19.3623	22.9496	22.8383	21.7337	22.4682	23.7565	24.3498	28.8532	24.1767
ENSMUSG00000010461	0.140827	0.226538	0.228891	0.216897	0.195119	0.19914	0.202472	0.195905	0.168694
ENSMUSG00000010476	0	0	0.00482784	0	0.00971467	0	0	0	0
ENSMUSG00000010492	0.105797	0.242529	0.231243	0.10262	0.104428	0.162348	0.0373867	0.168192	0.276492
ENSMUSG00000010505	0	0.0242209	0	0	0	0.00644823	0	0	0
ENSMUSG00000010517	13.4177	12.1224	11.1963	14.7138	12.1541	12.6508	25.0181	21.799	18.4097
ENSMUSG00000010538	1.15337	1.75008	2.32772	1.3451	2.00013	1.26903	1.12835	1.21027	1.73066
ENSMUSG00000010554	4.44439	4.42271	4.49841	3.87321	2.53892	4.22845	3.70072	4.50283	3.51801
ENSMUSG00000010601	0.0948111	0.121939	0.147179	0.290255	0.206787	0.244626	0.38619	0.384096	0.479862
ENSMUSG00000010607	10.5276	9.71357	7.88895	7.37154	6.32248	9.25879	10.267	9.82463	6.16732
ENSMUSG00000010608	13.665	13.6868	12.4361	13.9155	13.4567	12.3365	11.5993	11.4479	12.5463
ENSMUSG00000010609	5.4124	5.38568	4.92021	5.10507	6.387	6.85482	5.53789	5.25255	4.68611
ENSMUSG00000010651	0.0808882	0	0	0.0872607	0	0	0	0	0
ENSMUSG00000010660	0.0170835	0	0.0135399	0.0269736	0	0	0	0.0546178	0.014523
ENSMUSG00000010663	23.0761	20.0362	21.7055	17.3593	16.3506	17.2013	18.9927	16.5913	19.451
ENSMUSG00000010721	0.579215	0.557569	0.745534	0.677204	0.564416	0.784649	0.455834	0.537547	0.205257
ENSMUSG00000010751	32.6786	31.4392	18.9913	32.2398	34.3385	31.8907	11.0136	9.47373	10.9201
ENSMUSG00000010755	11.5262	11.3248	12.3342	21.1702	20.1056	19.7275	22.405	23.7822	23.1778
ENSMUSG00000010803	0	0	0	0	0.0122358	0.00635241	0	0	0
ENSMUSG00000010825	0	0.0212698	0	0.00808551	0.040108	0.0068706	0.0115699	0.0281261	0
ENSMUSG00000010830	23.0269	19.9006	18.6477	24.4373	18.0961	15.1767	43.9251	36.6149	35.8871
ENSMUSG00000010841	0	0.0372038	0	0.0538507	0	0	0	0.0966517	0
ENSMUSG00000010911	25.4847	23.0607	21.2031	27.7897	24.1564	24.1553	15.8913	13.4553	12.0553
ENSMUSG00000010914	12.262	12.4032	10.6366	10.1341	10.2033	10.2679	7.05264	6.08333	6.10244
ENSMUSG00000010936	11.8435	14.2298	14.2737	9.53881	9.43816	10.2513	7.03857	8.05625	10.3641
ENSMUSG00000011008	0	0	0	0	0.0408933	0	0	0.00983015	0
ENSMUSG00000011034	0.269149	0.167407	0.355328	0.126641	0.292786	0.214806	0	0.025909	0
ENSMUSG00000011096	20.1575	18.1516	10.9278	17.9431	17.0748	14.2932	9.3767	14.5973	18.5371
ENSMUSG00000011114	59.6803	45.9311	48.5314	57.2178	48.5661	46.0264	106.317	81.8893	81.4505
ENSMUSG00000011118	0.0153872	0	0.0653173	0.00758336	0	0	0	0	0
ENSMUSG00000011148	4.25728	5.27994	4.81187	7.25792	10.1845	8.30156	4.67425	4.06512	4.39326
ENSMUSG00000011154	0	0	0.0281429	0	0	0	0.0152522	0	0.0424189
ENSMUSG00000011158	4.74213	5.39061	4.51162	4.91257	5.25691	5.58388	3.07014	3.71775	3.42721
ENSMUSG00000011179	74.5243	63.0516	66.8683	61.5442	62.3923	59.9953	78.4747	74.1013	61.2968
ENSMUSG00000011254	4.013	3.3541	3.50482	2.53272	1.82481	2.85596	2.66588	2.32508	2.40088
ENSMUSG00000011256	0	0.011981	0	0	0.0560941	0.042175	0.0145181	0.0538011	0.0501489
ENSMUSG00000011257	63.2268	64.1794	71.8419	61.4557	62.7913	59.5693	66.932	69.6664	73.711
ENSMUSG00000011263	0.064951	0.0704	0.055852	0.019408	0.02232	0.034437	0.024676	0	0
ENSMUSG00000011267	3.18837	2.93263	2.57316	2.27767	1.5294	2.22541	3.92058	3.81742	4.54096
ENSMUSG00000011305	0.0373258	0.0829809	0.0212674	0	0.0245428	0.066894	0	0	0
ENSMUSG00000011306	7.92336	9.3051	8.35503	7.84699	8.50144	8.19856	6.03222	7.84513	7.88377
ENSMUSG00000011350	0	0.0213161	0	0.0364624	0	0	0	0	0
ENSMUSG00000011382	0.125906	0.125112	0.158543	0.124411	0.105664	0.177184	0.986642	1.48095	1.27743
ENSMUSG00000011427	2.89016	3.05065	3.21271	2.30078	3.72192	3.86687	2.26046	2.9589	3.19785
ENSMUSG00000011463	0.0156364	0	0	0	0	0	0.0148381	0	0
ENSMUSG00000011589	0	0.0133053	0	0	0	0	0	0.0136151	0
ENSMUSG00000011632	0.201721	0.610885	0.071248	0.09224	0.053166	0.055203	0.187918	0	0.248723
ENSMUSG00000011658	0.46949	0.149284	0.215286	0.461907	0.130599	0.481967	0.579445	0.625833	0.081835
ENSMUSG00000011751	0.559212	0.805563	0.919319	0.800695	0.97311	1.16108	0.336353	0.752735	0.662892
ENSMUSG00000011752	253.546	229.505	266.582	241.614	201.555	247.967	237.008	247.696	234.02
ENSMUSG00000011831	6.28048	6.44514	5.95849	5.97899	6.32913	6.19432	5.67075	5.70763	5.26725
ENSMUSG00000011832	0.505555	0.457405	0.463	0.696197	0.579779	0.446679	1.03137	1.04086	0.949918
ENSMUSG00000011837	13.7776	12.4542	14.3082	13.4422	10.2142	11.6706	14.9585	11.7843	10.8033
ENSMUSG00000011877	27.1436	30.3517	29.2116	31.0968	33.3284	34.36	30.4479	36.035	51.7242
ENSMUSG00000011884	30.7122	30.1954	27.941	30.0031	31.515	29.8521	22.6828	21.6534	29.4567
ENSMUSG00000011958	19.3608	17.6706	15.6868	22.0058	17.9712	21.7545	17.7384	20.0188	14.4645
ENSMUSG00000011960	17.3213	17.9361	19.1126	19.5645	20.5246	21.3011	20.6456	22.6703	21.8881
ENSMUSG00000012017	0.0128376	0	0	0	0	0	0	0	0
ENSMUSG00000012076	9.2728	7.34739	8.1758	7.63115	6.69885	6.4196	7.347	6.61904	5.22858
ENSMUSG00000012114	2.91314	3.85909	3.71256	2.8535	3.70091	3.82805	2.69939	3.20157	5.03505
ENSMUSG00000012117	4.95353	5.18078	3.05543	4.52981	4.72516	4.59151	5.2378	7.16635	4.05061
ENSMUSG00000012123	0.0331148	0.030615	0.0939338	0	0.0395497	0	0	0	0.0173354
ENSMUSG00000012126	0.0758802	0.231467	0.114229	0.0529276	0.130923	0.0559609	0.0427437	0.0397814	0.0544363
ENSMUSG00000012187	0	0	0	0.0322526	0	0.162597	0.0665359	0.136498	0
ENSMUSG00000012282	0	0	0	0.055144	0	0	0	0.048377	0
ENSMUSG00000012296	10.3931	11.5668	6.74232	9.66177	10.8243	10.8315	13.4228	15.4379	17.0048
ENSMUSG00000012350	26.101	26.1804	25.4919	27.7028	29.9177	29.0958	13.5017	15.0048	14.2414
ENSMUSG00000012396	0	0	0	0.0232313	0	0	0	0	0
ENSMUSG00000012405	196.233	190.589	179.999	180.94	172.08	169.402	183.72	178.013	137.932
ENSMUSG00000012422	8.04718	4.90179	6.31702	6.68914	5.64504	5.45106	7.08345	6.78485	3.66389
ENSMUSG00000012428	2.63662	1.95815	2.10332	2.18635	1.74306	1.69687	0.602436	0.436331	0.313274
ENSMUSG00000012429	4.03565	3.27297	3.53746	3.99906	4.25308	3.1606	4.34715	2.23541	2.87813
ENSMUSG00000012443	27.8199	29.6884	27.9559	29.1915	29.414	29.398	26.9582	28.8636	27.583
ENSMUSG00000012483	26.2184	18.9446	21.1075	24.5212	18.3875	16.7499	18.8483	15.539	8.33827
ENSMUSG00000012519	37.1823	30.322	33.0257	29.7255	26.6156	27.1261	28.6605	30.1988	29.0404
ENSMUSG00000012535	7.17091	8.78482	8.11038	7.38589	10.0862	9.51345	8.1305	9.50451	7.39455
ENSMUSG00000012609	0.62212	1.01297	1.0949	0.748016	0.795929	0.841621	0.257005	0.413032	0.401888
ENSMUSG00000012640	2.01267	2.66224	2.71539	3.42542	3.27812	3.24831	2.35803	3.71029	2.98512
ENSMUSG00000012705	0	0	0	0	0	0	0.0107963	0	0
ENSMUSG00000012777	0	0.0144715	0	0.0259319	0	0.0184689	0.0255657	0.097656	0.0858509
ENSMUSG00000012819	0.00147453	0	0.0158903	0.00287832	0.00791898	0.00548479	0	0	0
ENSMUSG00000012848	325.15	255.5	279.833	312.353	296.712	304.851	492.739	449.093	292.965
ENSMUSG00000013033	1.81787	2.90574	4.87245	2.49974	4.51382	3.76073	1.66703	4.32887	3.53414
ENSMUSG00000013076	3.40058	4.92355	5.06924	4.49983	5.84825	6.37212	2.12942	3.05849	1.31477
ENSMUSG00000013089	10.0348	13.2516	12.4263	8.3356	9.44521	10.2153	9.52653	11.6027	12.3796
ENSMUSG00000013091	0.840108	1.53154	0.796179	1.35031	1.1746	1.02536	0.50551	0.917831	1.38389
ENSMUSG00000013150	6.07776	5.32705	6.72239	5.3932	6.25864	6.1011	3.18805	3.47417	2.26869
ENSMUSG00000013155	4.52182	4.72969	4.82966	3.75778	3.78682	3.19142	2.37699	2.2457	2.04072
ENSMUSG00000013158	0.106601	0.307263	0	0.09507	0.150703	0.046502	0.0348566	0.0173618	0.0272313
ENSMUSG00000013160	71.0588	57.9008	55.5429	54.9079	53.7971	50.9237	45.6457	39.3615	37.1992
ENSMUSG00000013236	1.87264	2.93374	2.56172	2.37196	3.01107	3.26956	2.44447	4.26706	3.88289
ENSMUSG00000013275	7.84797	8.62414	9.01925	7.23003	7.91023	9.37411	10.801	12.0383	14.7321
ENSMUSG00000013338	0	0	0.0130104	0.00549947	0.0129983	0	0	0	0
ENSMUSG00000013353	0	0	0	0	0	0.00826138	0.00920154	0	0
ENSMUSG00000013367	2.24514	2.13584	2.37713	2.85164	2.89797	3.02319	1.70836	2.29189	3.2353
ENSMUSG00000013415	7.44138	8.36178	8.2333	6.28541	7.10643	7.42488	4.57113	5.7628	5.59871
ENSMUSG00000013418	0.268086	0.158417	0.115289	0.364373	0.295018	0.410262	6.04127	7.60906	8.47016
ENSMUSG00000013419	0.0187028	0	0.0572813	0.00731724	0.0305219	0.0263547	0	0.012044	0
ENSMUSG00000013465	9.90267	9.42722	10.0305	10.5771	11.1321	11.5073	14.8878	14.2717	8.97836
ENSMUSG00000013483	0.0213835	0.056734	0.0182443	0.0578659	0.129042	0.0346462	0.0418035	0.0574035	0.0561366
ENSMUSG00000013495	0.547689	0.298145	0.598475	0.341637	0.264912	0.505603	0.409647	0.341279	0.505742
ENSMUSG00000013523	0.952781	0.903771	1.09729	0.805421	0.76808	0.832449	1.1706	0.75453	1.24949
ENSMUSG00000013539	0.685298	0.622373	0.74641	0.627133	0.643928	0.727055	0.499752	0.700206	0.627636
ENSMUSG00000013562	0.0991239	0.157343	0.305004	0.0781044	0.128393	0	0.16761	0.305471	0.311112
ENSMUSG00000013584	0	0.134631	0	0	0.019796	0.102774	0	0	0
ENSMUSG00000013593	155.743	135.057	138.325	151.273	137.049	135.809	148.106	140.847	100.69
ENSMUSG00000013611	0	0.0516989	0	0.052579	0	0	0	0	0
ENSMUSG00000013622	9.35971	5.92316	7.69671	7.53989	6.47174	7.28122	5.3306	5.19695	6.7414
ENSMUSG00000013629	11.5352	16.1325	15.6389	9.54086	12.8077	12.4921	5.70535	8.67483	7.53163
ENSMUSG00000013643	0	0	0	0.0811271	0.139623	0.108729	0	0	0
ENSMUSG00000013646	4.10388	4.35247	4.47087	4.17486	4.10745	4.53475	2.61189	3.14911	2.31848
ENSMUSG00000013662	25.2075	21.8617	22.2193	25.9441	23.4688	24.2863	23.3408	20.0587	17.9292
ENSMUSG00000013663	16.7113	18.0741	17.3649	15.8911	17.1669	17.452	14.2277	15.4857	14.4565
ENSMUSG00000013698	119.718	120.62	101.494	149.377	108.15	107.471	159.605	131.845	156.105
ENSMUSG00000013701	41.9557	28.2802	35.3688	31.6193	33.1242	28.3202	29.0917	28.575	24.9696
ENSMUSG00000013707	0.094187	0.038809	0	0.06963	0.030452	0	0	0	0.018389
ENSMUSG00000013736	18.8006	13.0543	11.5101	11.9668	10.8598	14.8911	12.0124	14.3203	9.34539
ENSMUSG00000013787	23.4839	25.9645	26.5869	22.8634	25.1504	28.4555	21.7967	23.5882	24.0395
ENSMUSG00000013822	23.8258	16.055	18.6213	17.8809	17.8091	18.572	20.4852	18.1237	12.2469
ENSMUSG00000013833	2.25989	3.09662	2.52835	2.78278	2.59667	3.27376	2.09281	1.97542	3.14333
ENSMUSG00000013846	15.4996	16.6869	15.8579	15.2347	16.6968	16.7185	28.6654	30.9172	32.919
ENSMUSG00000013858	13.5391	14.484	15.2063	14.7517	15.3699	16.5373	14.3066	15.9501	17.5733
ENSMUSG00000013878	0.479422	2.45639	2.66462	0.597019	1.98543	2.41903	0.563065	1.73278	0.560058
ENSMUSG00000013921	0.0398105	0.067907	0.0114003	0.0132361	0.0455593	0.0236527	0.0256947	0.0647773	0.033234
ENSMUSG00000013928	0.0623486	0.161198	0.00461137	0.0781405	0.0671614	0.0509365	0.00300187	0.0174889	0
ENSMUSG00000013936	0	1.29943	1.97236	0	2.10757	4.55067	0	1.41004	1.85242
ENSMUSG00000013973	5.27808	5.23132	4.77038	5.2717	2.62336	4.83073	6.79625	6.31343	7.82558
ENSMUSG00000013974	0.034994	0.051412	0	0	0.029894	0	0	0	0
ENSMUSG00000013997	6.5327	6.48447	6.22197	6.85369	6.94226	5.90516	6.72492	5.48862	5.92332
ENSMUSG00000014030	0.0762654	0.089901	0.140294	0.0761289	0.0959395	0.0810689	0.892716	1.09427	1.59116
ENSMUSG00000014039	1.37425	1.5163	1.7797	1.56211	1.48686	1.76644	1.15324	1.62097	0.936157
ENSMUSG00000014074	6.29743	7.35443	8.55079	7.2723	7.48118	7.88038	5.0599	5.8743	5.52577
ENSMUSG00000014075	2.66845	1.88519	2.88089	2.18864	1.54134	2.09843	2.47367	2.08049	1.13768
ENSMUSG00000014077	44.7912	43.0995	42.9736	47.0023	45.3587	43.8983	37.5334	37.0755	29.8907
ENSMUSG00000014158	0.133105	0.0874752	0.140416	0.128499	0.112707	0.12157	0	0	0.0110588
ENSMUSG00000014164	0.0957704	0.120488	0.23996	0.10154	0.224585	0.126822	0.186942	0.0911141	0.343876
ENSMUSG00000014177	28.0106	18.2495	21.9433	28.8275	25.55	27.1972	38.5193	35.1162	16.7049
ENSMUSG00000014195	13.409	12.22	10.4852	11.7126	10.9896	10.8939	13.9525	11.7909	12.4524
ENSMUSG00000014198	0	0	0	0	0.0610696	0	0	0	0
ENSMUSG00000014226	99.0126	79.8163	77.8111	77.3526	60.2226	65.7121	64.0136	56.0602	48.6398
ENSMUSG00000014232	5.07041	5.48499	4.51816	4.24943	3.53817	3.26991	3.17338	2.43651	1.74194
ENSMUSG00000014243	5.80865	4.76744	3.23404	3.29768	2.51639	2.702	3.16642	2.94821	3.38067
ENSMUSG00000014245	7.78659	8.58718	6.57169	6.53954	5.87116	5.22892	10.1396	9.34281	12.59
ENSMUSG00000014294	78.6154	62.3043	69.6622	70.6624	72.6891	73.2943	97.4799	83.0706	40.6581
ENSMUSG00000014301	6.47957	5.02151	5.12741	5.70236	5.80949	6.37624	8.27563	9.58614	5.62476
ENSMUSG00000014303	3.30952	5.35867	5.21416	4.24031	6.147	5.87721	5.63523	7.48382	14.2563
ENSMUSG00000014313	61.0975	43.9506	53.0134	45.3974	56.5636	58.3399	55.4457	46.7069	25.0664
ENSMUSG00000014329	8.24498	10.9598	10.2825	6.08384	7.02558	6.50036	5.7026	6.40533	8.86116
ENSMUSG00000014349	56.4614	47.362	49.8291	57.1788	53.4301	55.0737	60.0119	58.3797	46.921
ENSMUSG00000014351	0	0	0	0	0	0.338691	0.132286	0.120334	0.0656147
ENSMUSG00000014353	4.41982	2.17094	5.08824	5.47827	6.4587	2.45913	2.44971	3.45863	3.44069
ENSMUSG00000014355	11.243	13.5143	13.3988	11.4432	13.5217	13.2442	9.21341	12.6383	11.2908
ENSMUSG00000014361	0.379677	0.560567	0.51399	0.496498	0.518553	0.522192	0.800818	0.915124	0.811042
ENSMUSG00000014402	30.4773	28.0617	26.3467	31.0992	25.9114	27.1227	25.2922	20.9	30.7499
ENSMUSG00000014418	3.9027	5.33207	5.14178	4.96578	5.67329	5.10374	4.46481	4.75066	3.99757
ENSMUSG00000014426	1.66135	1.89483	2.01651	1.76883	2.16679	1.77422	2.44366	2.75792	2.96186
ENSMUSG00000014444	19.6377	30.5255	28.8707	26.1469	35.7222	34.8731	14.9948	23.777	27.4499
ENSMUSG00000014453	0.00471493	0	0	0	0	0	0	0	0
ENSMUSG00000014470	8.93141	7.45244	8.14987	10.773	10.5067	10.3602	13.3332	12.4028	14.8235
ENSMUSG00000014496	6.40394	6.93695	7.00386	7.43898	7.4244	7.67674	7.6409	9.56272	7.5465
ENSMUSG00000014498	25.7964	43.7117	39.6436	24.3673	33.1006	33.4869	22.5664	34.5168	46.8764
ENSMUSG00000014503	2.08566	1.35188	1.28165	2.34602	2.26368	1.87382	3.22438	3.12469	2.51828
ENSMUSG00000014504	14.1104	9.72879	9.60756	11.5307	9.64788	9.5648	13.9675	11.2216	9.19392
ENSMUSG00000014542	0.027977	0	0	0	0.018138	0	0	0	0
ENSMUSG00000014543	0.132359	0	0	0.0827729	0	0	0	0	0
ENSMUSG00000014547	1.10062	1.28965	1.17529	1.05287	1.19512	0.739983	1.31523	1.59366	1.44157
ENSMUSG00000014550	4.82233	4.77918	4.48431	5.12492	5.46613	5.44031	7.10994	8.29493	6.04721
ENSMUSG00000014551	14.8027	10.2154	12.8176	14.3104	11.5861	12.1365	13.4936	10.6547	9.81694
ENSMUSG00000014554	2.42639	2.54822	2.05241	2.37792	2.86832	2.53693	3.88789	2.62162	2.84128
ENSMUSG00000014592	0.147642	0.24078	0.212845	0.191162	0.152304	0.201298	0.30095	0.273196	0.17284
ENSMUSG00000014599	27.8127	28.3361	28.663	18.4275	17.6652	17.9928	12.1529	12.9207	7.76707
ENSMUSG00000014601	9.38173	9.9157	9.79633	7.99366	7.8794	7.94572	9.82785	10.7095	11.2057
ENSMUSG00000014602	3.62	5.36079	4.7256	3.83571	4.84452	5.43308	2.05979	2.75431	4.20727
ENSMUSG00000014606	35.3577	28.4273	30.2649	30.8946	28.8717	26.4943	30.3722	27.3041	23.7526
ENSMUSG00000014633	6.28145	4.71241	5.13748	5.7961	2.79422	3.90155	3.09735	3.96628	1.98964
ENSMUSG00000014668	5.45748	5.94825	4.48114	4.45558	6.79217	5.01073	6.18079	6.80501	6.04909
ENSMUSG00000014686	0.244316	0.372042	0.398599	0.438088	0.200321	0.337042	0.511177	0.496243	0.327256
ENSMUSG00000014704	0.238146	0.036797	0.317162	0.029343	0.201467	0.562568	0.305684	0.263246	0.53322
ENSMUSG00000014725	0.0510302	0	0.00736131	0	0	0.0101343	0.00514687	0.00874044	0
ENSMUSG00000014747	0.144581	0.113451	0.188881	0.015678	0.055813	0.035243	0.214785	0.417317	0.114379
ENSMUSG00000014748	22.7147	22.8057	20.7072	21.3197	21.4905	21.6608	17.675	17.5045	20.5648
ENSMUSG00000014763	4.54481	4.94937	4.96406	4.80156	4.72849	5.60064	6.33151	6.58147	7.44375
ENSMUSG00000014767	2.53141	2.67894	2.52482	2.47279	2.07282	2.18159	3.00444	2.82937	3.06764
ENSMUSG00000014769	32.5691	26.7305	27.1035	29.0875	29.1617	28.0303	29.4399	26.4858	20.3789
ENSMUSG00000014771	9.06616	6.71595	6.40597	8.67316	7.63968	8.3431	11.2368	8.90291	8.47292
ENSMUSG00000014773	0.262001	0.342398	0.231751	0.32803	0.473477	0.407143	0.302953	0.381785	0.449844
ENSMUSG00000014776	1.40618	1.32844	1.42342	1.07964	1.44155	0.891682	3.48122	2.66372	2.94965
ENSMUSG00000014778	6.07995	6.51485	5.59992	4.24397	4.92851	5.30157	3.50753	4.05498	4.24816
ENSMUSG00000014782	0.283532	0.399482	0.465275	0.297659	0.187108	0.220952	0.167153	0.0852462	0.257619
ENSMUSG00000014786	3.82129	5.96211	5.08022	4.25778	4.12995	4.59273	2.95189	3.70701	3.66968
ENSMUSG00000014791	3.12166	4.6404	3.46906	3.91168	4.60577	4.51361	4.17658	3.77292	4.62169
ENSMUSG00000014813	8.52703	9.19456	8.91096	9.25811	10.9076	11.2505	6.78296	8.52656	9.35252
ENSMUSG00000014837	0.154718	0.371836	0.172178	0.409705	0.304368	0.314027	1.52255	1.47693	1.46343
ENSMUSG00000014846	0.733024	0.775738	1.1269	0.857816	1.02655	0.596401	0.94719	1.47014	1.43727
ENSMUSG00000014850	3.2725	2.84854	3.09634	3.16486	3.03373	2.50664	2.17001	2.27083	1.78536
ENSMUSG00000014852	0.0100587	0	0.0158199	0.0204257	0.0168383	0	0.0142014	0	0
ENSMUSG00000014856	19.0681	14.0794	17.6713	17.4062	16.2319	17.845	13.0168	16.7227	9.10311
ENSMUSG00000014859	42.7541	55.5929	48.1898	30.8779	36.2166	37.7498	39.729	38.5159	67.1764
ENSMUSG00000014867	67.9895	69.5661	66.6505	66.5336	64.4827	65.4635	79.9234	82.3139	81.3419
ENSMUSG00000014873	4.63944	4.97901	4.16223	4.1882	4.69797	4.03752	3.78467	3.6911	3.41676
ENSMUSG00000014905	12.6904	11.4229	12.7691	16.309	12.4113	14.033	14.5186	12.7177	13.6726
ENSMUSG00000014907	15.7563	14.1476	14.4228	13.1696	11.9896	11.9234	9.74277	7.49129	8.63352
ENSMUSG00000014932	4.86983	5.06118	5.37254	5.90391	5.75366	5.94268	6.28512	6.36594	5.03882
ENSMUSG00000014956	15.3108	11.8806	14.0767	17.5421	16.7225	17.5167	22.0119	19.9389	16.178
ENSMUSG00000014959	34.134	29.6419	28.5934	29.2041	29.9577	27.4952	36.0468	32.2355	46.3669
ENSMUSG00000014980	8.09765	6.57517	7.00239	7.20607	6.03816	6.09639	9.81319	7.46982	7.34766
ENSMUSG00000015002	14.0751	15.6481	14.394	15.5707	15.5067	15.413	17.6755	20.3284	16.3714
ENSMUSG00000015013	20.7155	15.2207	15.9444	17.9988	11.2327	10.6498	11.5792	8.33627	5.22708
ENSMUSG00000015016	2.45883	2.19285	2.68911	2.17287	2.68098	1.86778	1.23279	1.50065	1.47345
ENSMUSG00000015023	25.9781	27.9055	26.848	24.4904	23.7125	24.5218	20.9096	22.8809	24.2596
ENSMUSG00000015027	8.34388	10.4104	9.61254	8.38244	10.7348	10.9985	9.52399	10.2247	12.7486
ENSMUSG00000015053	0	0	0.0415527	0	0.00830301	0.00816476	0.00960227	0.0153703	0
ENSMUSG00000015083	0.318504	0.224688	0.325843	0.301507	0.28736	0.243874	0.242671	0.133874	0.237935
ENSMUSG00000015085	17.8199	17.3075	15.9797	14.246	21.2452	21.4707	21.2761	21.6738	25.3644
ENSMUSG00000015087	6.65213	7.00813	7.41175	5.94648	6.16073	7.20009	7.76401	9.70923	8.7382
ENSMUSG00000015090	0.0244646	0	0.0678192	0.0541809	0.108718	0.0423312	0	0.0386898	0.0804684
ENSMUSG00000015092	34.5968	35.2951	27.368	34.0568	24.7422	27.4516	26.9751	21.0185	36.6499
ENSMUSG00000015093	4.69775	4.67218	3.51913	9.28395	5.39133	5.42561	6.18305	4.70152	3.81693
ENSMUSG00000015094	8.59925	10.4453	10.3514	11.1464	10.5579	11.2832	12.6885	9.94265	13.5891
ENSMUSG00000015095	5.56683	5.67341	4.50675	4.61904	4.86277	5.33244	3.79077	4.24279	4.65759
ENSMUSG00000015112	18.4414	16.3259	18.2258	15.0355	15.0794	15.0097	15.4271	15.9695	11.718
ENSMUSG00000015120	49.1412	45.2413	43.7325	48.2884	44.8498	42.5368	50.8562	46.4574	50.6016
ENSMUSG00000015126	15.7573	13.2643	15.8227	15.7554	16.3886	14.7781	16.7833	16.6045	13.2797
ENSMUSG00000015127	3.11191	4.05574	3.56631	3.74045	4.44438	3.1982	4.11781	4.96816	4.89226
ENSMUSG00000015133	6.11743	8.36824	7.46394	7.41827	10.8679	10.1479	4.12195	6.11921	7.74468
ENSMUSG00000015134	0.0451729	0	0	0.038609	0.0578002	0.0696676	0.0222941	0	0.043935
ENSMUSG00000015143	55.0074	67.0098	65.1792	64.2835	69.6091	75.2639	24.4701	26.959	28.1474
ENSMUSG00000015149	7.21557	8.47799	7.61947	5.51192	8.10278	7.22833	5.72023	7.5026	9.10335
ENSMUSG00000015165	40.0847	42.1351	40.2885	36.2131	36.967	39.2179	30.3646	28.8296	28.9166
ENSMUSG00000015176	75.6192	90.1816	81.7499	63.9562	66.8304	68.745	52.1363	61.628	75.7025
ENSMUSG00000015189	5.77481	6.20783	6.20876	6.48724	6.1957	6.26408	6.60432	6.44402	5.74794
ENSMUSG00000015202	3.76981	4.55777	4.59764	5.47336	5.54851	6.20801	7.18049	7.53325	7.70489
ENSMUSG00000015214	2.67593	2.49142	2.47951	2.39223	2.50425	2.428	2.76952	3.11499	2.66263
ENSMUSG00000015217	13.7082	10.6153	10.5371	13.5305	9.02113	9.70467	13.5751	12.6164	10.1826
ENSMUSG00000015222	0.00959868	0	0	0.0247272	0.0296584	0.0522767	0.11279	0.0899469	0.135785
ENSMUSG00000015243	4.7934	6.68163	6.78999	5.27987	6.78493	6.57079	7.39238	10.5058	10.0434
ENSMUSG00000015247	20.5479	13.3584	10.8296	15.5115	12.829	10.6599	16.9019	13.8099	10.9529
ENSMUSG00000015289	18.583	17.1665	16.573	14.7278	14.5831	13.8999	8.98264	6.28092	7.01784
ENSMUSG00000015290	17.1975	15.6666	14.3311	16.7924	14.9825	12.969	14.3109	12.3775	10.729
ENSMUSG00000015291	20.2187	13.7367	18.6212	23.0952	20.5808	21.8707	35.45	31.1306	37.5212
ENSMUSG00000015305	10.5397	14.2817	14.2097	16.4257	20.5336	21.3328	16.1888	21.8838	23.8873
ENSMUSG00000015312	7.1628	5.98866	7.78714	7.50721	7.01255	8.72965	14.5726	15.2594	9.50331
ENSMUSG00000015314	0	0	0	0.00318818	0	0	0	0	0
ENSMUSG00000015335	7.59691	8.19472	7.8354	7.12701	6.97347	7.89115	5.45509	4.12636	7.16584
ENSMUSG00000015337	8.55081	6.09346	8.12567	4.50163	4.24532	4.79243	6.53397	7.67324	4.33489
ENSMUSG00000015340	0.00909736	0	0	0	0	0	0	0	0.0541375
ENSMUSG00000015341	11.4793	11.7012	11.3292	10.5221	9.72117	9.78624	14.5142	13.2842	10.9969
ENSMUSG00000015342	1.46719	1.53067	1.20553	1.47466	1.42511	1.64289	1.07853	1.02686	0.884797
ENSMUSG00000015354	3.97636	2.73119	3.83202	5.24213	4.99831	4.7332	2.92836	2.65904	1.54416
ENSMUSG00000015355	0	0	0	0	0	0	0	0.0356458	0
ENSMUSG00000015357	8.80541	5.44878	7.69927	8.37032	7.27369	7.67823	8.64195	8.61685	6.72167
ENSMUSG00000015363	6.62074	5.05581	6.44538	5.87215	7.02046	7.97082	9.02903	14.1572	11.9026
ENSMUSG00000015365	0	0.0104101	0	0	0	0.0055627	0	0	0.0213626
ENSMUSG00000015377	1.34055	1.71153	1.76671	1.382	1.21903	1.78469	1.85453	2.08488	2.17758
ENSMUSG00000015451	0.228971	0.158512	0.146543	0.065713	0.0529918	0.145142	0.0748345	0.13792	0.0288499
ENSMUSG00000015452	0.0797136	0.347446	0.295088	0.280032	0.104666	0.160055	0.336477	0.227331	0.241574
ENSMUSG00000015461	15.9845	16.8247	14.2062	13.6699	15.1464	13.5172	14.0083	13.7506	13.6946
ENSMUSG00000015467	0	0.210749	0.317769	0.202691	0.421202	0.436609	0.617307	0.724991	0.663509
ENSMUSG00000015468	0.367242	0.353268	0.399197	0.352005	0.474343	0.604287	0.472435	0.518478	0.641897
ENSMUSG00000015474	4.63645	4.17304	5.25814	5.55228	5.11337	4.41217	6.95234	7.96026	6.66724
ENSMUSG00000015476	0.0458272	0	0	0.0719011	0.0187515	0.0201805	0	0	0.0390953
ENSMUSG00000015478	11.1286	10.6856	10.7082	12.6323	10.0324	12.2363	15.7578	15.0569	15.884
ENSMUSG00000015484	0.013611	0	0	0.026739	0	0.023975	0.013352	0	0
ENSMUSG00000015488	9.59764	8.1535	8.41918	10.3254	10.0526	10.3867	11.0446	10.804	6.65156
ENSMUSG00000015501	1.43397	2.16277	1.19856	2.04894	1.87344	1.62374	2.59871	2.83489	3.83691
ENSMUSG00000015522	4.29112	5.34743	5.25919	3.94499	4.65679	4.89832	5.96877	7.27193	8.73998
ENSMUSG00000015533	18.7679	25.4212	23.5704	24.4691	26.8632	25.7229	14.5243	18.8414	19.9873
ENSMUSG00000015536	3.50443	2.56804	3.06972	3.68375	2.72041	3.251	3.66998	3.22006	1.90059
ENSMUSG00000015542	3.86551	2.78386	4.27382	4.60849	3.98532	4.92932	3.94718	4.64215	4.01992
ENSMUSG00000015568	4.20738	4.37015	3.70464	3.97659	3.80189	4.10978	13.2644	13.2602	13.5353
ENSMUSG00000015575	29.5503	25.9388	23.7051	31.3379	26.3414	29.1965	24.5462	21.8781	20.3828
ENSMUSG00000015597	0.968779	1.08624	1.31206	1.21054	1.18587	1.4434	1.03856	1.21041	1.49471
ENSMUSG00000015605	10.6669	13.2472	11.8549	9.08442	11.4808	10.9519	13.444	17.7787	21.754
ENSMUSG00000015619	0.0146162	0	0.0451078	0.0130928	0.0338003	0	0	0	0
ENSMUSG00000015627	0.015386	0	0	0	0	0	0	0	0
ENSMUSG00000015647	40.9718	64.2879	65.1849	56.8643	78.4385	80.7633	61.5149	106.491	105.127
ENSMUSG00000015652	12.259	11.7796	12.6881	12.8961	10.6176	10.0364	10.0401	7.83951	7.4412
ENSMUSG00000015653	0.14926	0.0768629	0.117944	0.0882623	0.119943	0.12698	0.01849	0.0413749	0.0835631
ENSMUSG00000015656	426.095	404.769	385.609	261.926	239.54	239.772	218.425	192.127	282.301
ENSMUSG00000015659	0.846241	0.88637	0.632391	0.827332	0.696111	0.738343	0.753121	0.803066	0.993344
ENSMUSG00000015668	30.7744	29.9236	25.345	28.69	23.3148	25.0942	31.6678	23.7312	24.9709
ENSMUSG00000015671	58.4134	40.1159	45.96	47.4961	37.6876	36.6999	35.2916	26.6763	20.8357
ENSMUSG00000015672	5.34951	6.03123	5.31403	4.82869	4.86038	4.46754	4.101	4.49487	4.57351
ENSMUSG00000015697	9.33732	9.93315	9.65776	9.24112	9.25983	9.44205	7.51577	8.45523	8.8913
ENSMUSG00000015702	2.87292	2.14536	1.66392	2.51446	2.06732	2.0333	3.44627	2.37532	2.85559
ENSMUSG00000015709	3.25682	4.3907	4.09346	3.21046	3.49568	4.44305	0.361008	0.412341	0.391371
ENSMUSG00000015711	24.98	25.8154	24.4119	25.9999	25.2209	25.2884	17.6953	16.3466	19.531
ENSMUSG00000015714	80.2886	75.0385	67.5911	81.6066	73.6191	68.3378	97.2208	78.8174	91.4742
ENSMUSG00000015733	44.539	38.6182	38.7277	43.7936	40.531	37.3102	43.8335	40.0312	31.3788
ENSMUSG00000015745	2.77262	3.10696	3.87154	3.21115	2.9648	3.65085	4.27249	3.65203	6.65215
ENSMUSG00000015747	4.2628	4.07768	3.49313	4.36702	4.33009	3.22628	4.43811	3.99157	3.57141
ENSMUSG00000015748	10.7442	11.7098	10.1623	8.12444	9.47596	8.59255	9.10816	7.45965	9.56008
ENSMUSG00000015749	33.1519	24.6369	19.2018	19.7512	21.0403	16.5498	40.1651	20.3814	20.9908
ENSMUSG00000015750	14.7015	12.9916	12.6887	14.1285	14.7182	16.1736	16.0046	16.4596	14.9611
ENSMUSG00000015755	15.413	17.0233	17.3327	18.7318	17.8887	17.7555	22.2643	24.0528	29.9343
ENSMUSG00000015757	7.5523	7.85044	7.57984	8.22874	7.463	8.35918	10.5089	9.32717	9.40674
ENSMUSG00000015759	63.7539	48.4114	49.1804	59.821	48.4709	46.2711	69.8408	56.1377	56.3086
ENSMUSG00000015766	10.3927	10.8308	11.2751	9.80211	9.61136	10.3475	0.491101	0.605515	0.890832
ENSMUSG00000015776	19.0224	17.251	19.3064	17.4878	17.7115	18.7888	12.2119	11.1803	7.81469
ENSMUSG00000015787	0.0275197	0.147333	0	0.0542536	0	0	0	0	0
ENSMUSG00000015790	11.1333	7.2707	9.40375	9.67511	8.73453	7.34197	10.9578	8.94428	6.86007
ENSMUSG00000015804	5.95546	3.46158	4.24415	4.45814	3.40833	4.08879	4.15417	3.91386	2.70785
ENSMUSG00000015806	16.4515	9.16148	8.417	13.7886	10.9318	6.66006	9.2796	10.89	6.02333
ENSMUSG00000015812	0.240953	0	0	0.309042	0.224471	0	0.534559	0.635756	0.442089
ENSMUSG00000015829	0.017532	0.020333	0.0233058	0.00778758	0.0104495	0.0432347	0.0408231	0.00623898	0.0385368
ENSMUSG00000015837	148.627	150.22	152.618	194.988	200.793	190.962	329.081	330.616	307.885
ENSMUSG00000015839	59.0631	60.641	55.6188	48.5305	43.289	46.4895	49.7278	46.8876	59.3404
ENSMUSG00000015843	0	0	0	0	0	0.0202595	0	0.0185169	0
ENSMUSG00000015846	6.05315	7.49834	7.272	6.38932	8.78447	7.98344	5.5191	6.42817	7.40052
ENSMUSG00000015850	0.967905	0.95145	1.17664	1.45547	2.52567	1.46887	0.964622	1.14994	1.143
ENSMUSG00000015854	0.025769	0.085547	0	0.025581	0	0	0	0	0
ENSMUSG00000015869	13.7666	13.4952	14.0817	13.1609	13.5185	14.712	13.6842	14.7184	13.0573
ENSMUSG00000015879	0	0.00889812	0	0.0121156	0.0208507	0.0333149	0.00602856	0	0
ENSMUSG00000015880	8.38937	8.55606	9.241	8.27974	8.17743	8.83488	4.90064	5.64203	4.89602
ENSMUSG00000015882	0.986057	1.06963	1.11103	1.3143	1.43547	1.5004	1.60619	1.84807	1.59564
ENSMUSG00000015889	8.74224	6.44461	6.86076	8.18158	8.64461	7.97859	9.40272	8.88881	7.86171
ENSMUSG00000015890	0.021825	0	0	0.041739	0	0	0.154312	0.025053	0.230184
ENSMUSG00000015932	359.658	313.958	326.556	448.007	382.152	376.129	382.303	331.642	305.099
ENSMUSG00000015937	23.3992	26.995	24.9918	23.0483	24.9151	26.2759	29.4377	30.9999	32.7445
ENSMUSG00000015942	0.728812	1.19962	1.07282	1.29585	1.31854	1.27159	1.20286	1.17692	0.914867
ENSMUSG00000015943	1.24829	0.654286	6.48664	8.27754	0.675348	5.40751	0.798569	0.727555	7.57074
ENSMUSG00000015944	3.24269	4.4164	3.6748	3.40818	3.96518	3.96104	2.00056	2.42376	2.81855
ENSMUSG00000015947	0.050016	0.016819	0	0.059927	0.069001	0.025911	0.242844	0.086248	0.101203
ENSMUSG00000015950	0.0490625	0.139881	0.0854686	0.0284376	0	0.130737	0.0423999	0	0
ENSMUSG00000015957	0	0	0	0.0125897	0	0	0	0	0
ENSMUSG00000015961	106.593	92.863	97.5554	100.868	97.8994	93.33	140.198	133.143	103.89
ENSMUSG00000015962	0.526516	0.247478	0.630524	0.48895	0.64857	0.307559	0.707362	0.544956	0.266701
ENSMUSG00000015966	0.0131052	0	0.0121012	0	0	0.0124207	0	0	0
ENSMUSG00000015968	0	0.00385486	0	0	0	0.011581	0.00595213	0	0
ENSMUSG00000015970	0.0167286	0	0.0577255	0.00837712	0	0	0	0	0
ENSMUSG00000015971	2.87883	2.80553	3.00348	2.84567	2.45538	2.37071	2.36153	1.86812	1.54131
ENSMUSG00000015980	2.00672	2.19084	1.99854	1.99009	1.55363	1.81966	2.51235	1.99443	2.13187
ENSMUSG00000015981	0.0431588	0	0	0	0	0	0.111795	0	0
ENSMUSG00000015994	21.0263	16.4153	16.0834	17.8008	13.6668	13.4913	16.4116	14.8689	11.5948
ENSMUSG00000016018	23.7357	22.6054	22.987	20.1682	19.3094	20.5729	18.1259	20.4614	18.0909
ENSMUSG00000016024	60.833	66.7843	64.1697	69.0897	68.1704	75.3316	55.4734	61.5103	71.5264
ENSMUSG00000016028	0.0818096	0.0541739	0.0531419	0.102176	0.066237	0.0628817	0.100845	0.0734945	0.113157
ENSMUSG00000016087	0	0	0	0.0149405	0.025714	0	0	0	0
ENSMUSG00000016128	2.57622	3.15087	3.65238	3.33278	4.05466	4.338	4.04504	5.5943	4.20387
ENSMUSG00000016179	0.0637385	0.161491	0.145331	0.118984	0.247859	0.18909	0.0943731	0.279287	0.115442
ENSMUSG00000016181	6.53976	4.21444	6.10303	5.34244	5.31285	5.4579	6.36337	6.92906	5.9529
ENSMUSG00000016194	0.06055	0	0	0.12774	0.0527156	0	0.0609638	0.00988995	0
ENSMUSG00000016200	0.0868159	0.0271489	0.129818	0.0751643	0.0879538	0.138856	0.0130319	0.00711328	0.0413966
ENSMUSG00000016206	2.60304	1.41419	1.80397	2.4846	1.42304	2.48558	6.1737	7.12793	4.45837
ENSMUSG00000016239	2.72297	3.5963	3.76765	2.75647	2.88175	2.24213	4.58066	5.44085	4.24348
ENSMUSG00000016252	49.6234	23.8534	36.6113	40.9742	37.2187	35.3168	45.0145	33.5056	10.8227
ENSMUSG00000016253	15.4863	16.5277	14.6892	14.761	15.0783	15.9312	12.8445	14.9667	12.6538
ENSMUSG00000016255	0.073044	0	0.030686	0.291305	0.140667	0.237519	0.071022	0.121701	0.096182
ENSMUSG00000016256	361.915	333.492	338.626	405.557	389.388	400.313	404.2	382.2	362.63
ENSMUSG00000016257	72.1872	65.3174	61.8221	65.5764	57.135	57.3935	62.9047	57.6577	52.6017
ENSMUSG00000016262	0.865017	0.8596	0.813914	1.61314	1.28841	1.3359	2.45979	2.11283	2.45118
ENSMUSG00000016283	6.96957	7.59642	5.68723	2.71764	2.93701	3.08976	0.286878	0.1008	0.04339
ENSMUSG00000016308	11.0141	7.58557	7.85825	9.50208	8.55247	10.9219	12.4639	13.6393	12.5344
ENSMUSG00000016319	186.646	149.871	167.441	160.352	152.485	146.648	94.1893	86.497	55.4518
ENSMUSG00000016344	22.9638	20.7197	21.4946	20.8584	19.8657	19.2534	25.3274	24.201	22.4617
ENSMUSG00000016346	0.00640255	0.0257722	0	0.0262964	0.0414932	0.0260849	0.00369744	0	0.00275072
ENSMUSG00000016349	0	0.159739	0.169205	0	0.1463	0.422858	0	0.16068	0.235768
ENSMUSG00000016356	0.212453	0.186418	0.153319	0.266555	0.180181	0.299083	0.520339	0.48073	0.755142
ENSMUSG00000016382	77.1095	56.4562	70.4364	85.6773	87.1408	83.4244	59.6047	45.8225	53.2069
ENSMUSG00000016386	0.0151381	0	0	0	0	0.0134916	0.0151331	0	0
ENSMUSG00000016409	4.61159	5.20915	4.88326	4.97059	4.83118	4.96411	4.63201	4.90411	3.69763
ENSMUSG00000016427	58.2606	43.7459	58.4655	58.3818	54.6719	53.2492	57.4619	48.2208	19.2667
ENSMUSG00000016458	0.268096	0.112461	0.236084	0.249192	0.211478	0.152168	0.650845	0.533168	0.461598
ENSMUSG00000016477	11.5801	11.2693	12.2805	11.3327	11.5291	11.5426	8.80809	9.11158	8.7663
ENSMUSG00000016481	5.50003	4.7292	5.72531	5.5574	4.29753	4.9133	7.67872	6.60384	5.22416
ENSMUSG00000016487	27.1672	29.722	31.5368	33.6589	35.5117	34.8709	28.0801	33.0665	32.1322
ENSMUSG00000016493	0.340811	0.107283	0.428231	0.212653	0.208277	0.240897	0.442068	0.243872	0.557866
ENSMUSG00000016494	0	0.0534628	0.0166193	0.014289	0	0.0157567	0.0305548	0.029172	0.00618355
ENSMUSG00000016495	3.79196	3.89404	3.22788	4.34289	3.06681	2.52721	3.1827	3.17199	2.09293
ENSMUSG00000016496	1.68217	1.57494	1.36674	4.43604	3.6985	3.39444	2.86889	2.79665	3.82793
ENSMUSG00000016498	8.37349	7.3023	8.21799	16.6109	11.4005	10.0095	4.64172	4.29783	5.16204
ENSMUSG00000016503	44.5314	47.3917	36.943	36.8448	35.4849	36.3394	33.8338	27.5434	24.8851
ENSMUSG00000016510	8.93847	7.88007	5.75641	7.49939	6.50074	6.79275	6.55404	4.04779	4.21818
ENSMUSG00000016520	20.2319	25.8242	23.3505	20.7847	22.5392	22.4559	14.365	16.4926	18.9697
ENSMUSG00000016524	0.0459868	0	0	0.130721	0	0	0	0	0
ENSMUSG00000016526	18.8357	17.2593	16.4579	17.0792	17.8829	17.1962	22.4285	22.1918	20.0082
ENSMUSG00000016528	98.467	88.4968	98.1766	89.4679	87.4846	86.706	116.099	113.69	95.5009
ENSMUSG00000016534	26.8698	23.7335	26.0837	27.5722	27.8515	25.0946	29.6218	29.0684	27.5768
ENSMUSG00000016541	89.6428	70.1675	67.5674	97.2038	77.6809	71.2447	82.1666	63.6813	67.3539
ENSMUSG00000016552	0.00889679	0.0356138	0.0684215	0	0	0.0180405	0.0349092	0.0143233	0.0160496
ENSMUSG00000016554	35.6433	36.068	36.6586	34.3907	37.1411	35.0864	36.6876	35.0736	41.1286
ENSMUSG00000016559	180.124	141.039	150.728	225.549	202.705	199.277	512.969	428.596	365.628
ENSMUSG00000016619	16.7233	15.3551	15.0362	13.8321	15.6379	15.2425	16.0358	17.7805	16.7281
ENSMUSG00000016624	0.952236	0.984536	0.971853	0.804493	1.25305	1.3016	1.07541	1.20234	1.70399
ENSMUSG00000016626	0.0448163	0	0	0	0	0	0	0	0
ENSMUSG00000016637	1.99008	1.53472	1.76944	1.56456	2.0584	1.92137	0.918517	1.36974	1.09033
ENSMUSG00000016664	23.9765	24.3643	25.0755	26.9096	24.8315	16.7822	24.7278	25.5796	17.3478
ENSMUSG00000016756	0.00986155	0.00677149	0.00308546	0.0288436	0	0.00567505	0.0096733	0	0.00634265
ENSMUSG00000016757	13.9795	15.7196	14.9279	11.0108	14.6604	13.8755	9.26696	9.83135	12.4818
ENSMUSG00000016758	0	0.0302299	0	0.130715	0.189381	0.264997	0	0	0
ENSMUSG00000016763	0	0	0.00886843	0	0	0	0	0	0
ENSMUSG00000016831	8.91337	9.61433	9.23798	8.6772	8.0887	9.21487	11.4677	11.915	11.5432
ENSMUSG00000016833	19.8853	9.23455	14.9192	15.638	14.9	11.6193	19.6458	16.7437	8.15214
ENSMUSG00000016918	0.00701757	0.0115663	0	0	0	0	0	0	0
ENSMUSG00000016921	64.1314	49.6646	49.7883	57.6502	53.0709	50.8338	82.8377	72.0295	63.1718
ENSMUSG00000016933	10.078	12.1179	11.9466	10.093	11.0832	10.8706	8.90205	10.6678	7.98872
ENSMUSG00000016940	4.04236	4.23865	2.38778	4.54454	4.3761	5.53457	3.2958	3.37501	2.79246
ENSMUSG00000016942	0.450525	0.769521	0.442115	1.23928	1.01945	1.01367	0.917842	0.798022	0.524352
ENSMUSG00000016946	27.3646	25.435	26.0632	25.2726	24.4774	25.9734	23.3625	21.1233	18.3073
ENSMUSG00000016982	0	0.00498945	0	0	0.025186	0	0.0439996	0.0535656	0.0586772
ENSMUSG00000016984	7.4191	5.9986	7.32264	8.69186	8.41861	7.73461	7.71503	7.894	6.63614
ENSMUSG00000016995	0.0204251	0.00841599	0.0260111	0	0.00866242	0	0	0	0
ENSMUSG00000016998	0.072283	0	0	0	0	0	0	0	0
ENSMUSG00000017000	0.080333	0	0	0	0	0	0	0	0
ENSMUSG00000017002	47.344	35.1709	39.7561	34.4851	32.4799	28.3995	8.61582	7.43072	4.63195
ENSMUSG00000017007	0	0	0	0	0	0.0243559	0	0	0
ENSMUSG00000017009	32.6767	34.9942	32.7446	33.5346	40.5307	40.1261	53.1864	56.7317	43.7683
ENSMUSG00000017057	6.86163	5.72658	7.48	5.88976	6.28003	5.66143	11.3171	12.8497	11.8466
ENSMUSG00000017119	13.333	13.9816	14.6999	18.7013	18.8434	14.7888	19.9166	22.5194	23.2966
ENSMUSG00000017132	5.56703	5.2459	5.3927	5.85703	5.92379	6.30224	5.33925	6.71994	4.545
ENSMUSG00000017144	9.26542	7.21791	7.60789	7.68793	6.9444	7.94259	8.61321	7.63527	7.5976
ENSMUSG00000017146	6.50412	8.44712	9.44627	7.80517	7.71945	8.76263	5.59135	5.97832	6.14563
ENSMUSG00000017167	1.06704	1.26618	1.32645	0.852449	1.48005	1.73608	1.63503	1.82237	1.89974
ENSMUSG00000017176	10.9271	9.86674	8.25997	8.29957	7.81026	8.00434	8.16377	8.19291	10.0214
ENSMUSG00000017188	18.0182	13.9091	12.8089	19.1461	17.4834	13.6025	18.117	14.3109	10.9345
ENSMUSG00000017195	0.0228829	0	0	0.0453676	0.124769	0.0276504	0.0448944	0.0252721	0
ENSMUSG00000017204	0.048458	0.141567	0.049369	0	0.032883	0.093892	0.468783	0.442148	0.591048
ENSMUSG00000017210	5.51452	6.33367	6.03207	5.18533	5.72796	5.49584	5.85787	6.53563	7.2866
ENSMUSG00000017211	0	0	0	0.0168939	0	0	0	0	0
ENSMUSG00000017221	35.3125	38.1904	32.016	29.648	27.7486	33.7167	27.8355	25.788	28.6448
ENSMUSG00000017264	9.38454	10.1003	9.30551	7.93815	6.40049	8.92735	8.19883	9.51853	10.5536
ENSMUSG00000017286	10.1467	8.69775	8.35129	10.97	9.35756	9.72771	6.10263	6.4809	3.67117
ENSMUSG00000017288	8.5244	7.91399	7.83327	6.88917	7.77819	7.21382	7.64171	7.40617	7.54375
ENSMUSG00000017291	10.9367	14.692	6.75383	12.1184	15.2485	15.55	9.29132	7.45468	11.2277
ENSMUSG00000017299	23.6773	24.9212	23.3154	27.6576	25.7506	24.3832	24.019	23.382	25.0952
ENSMUSG00000017300	0.136427	0	0	0	0	0	0	0.132166	0
ENSMUSG00000017307	8.36587	9.55977	8.21464	8.92797	9.10523	9.95572	11.2998	12.8812	11.5293
ENSMUSG00000017309	0	0	0	0	0.0485489	0	0	0.04662	0
ENSMUSG00000017314	2.65837	3.40863	3.06055	2.73544	2.60198	2.98742	5.31585	6.20589	6.33812
ENSMUSG00000017344	0.436869	0.0428998	0	0.559663	0	0	0.241213	0.131808	0.0648966
ENSMUSG00000017376	4.68293	5.07305	4.90037	3.95097	4.15889	3.90445	5.00059	4.90952	6.06172
ENSMUSG00000017386	38.3492	41.1237	34.8939	37.3208	41.1989	40.738	30.4763	31.7078	37.1077
ENSMUSG00000017390	0.481105	0.591427	0.458331	0.458865	0.148479	0.537956	3.42593	3.04204	3.06591
ENSMUSG00000017400	0.0336656	0	0	0.0829621	0	0.133427	0	0	0
ENSMUSG00000017404	654.693	645.318	634.564	643.412	600.312	615.777	833.184	742.02	738.41
ENSMUSG00000017405	2.675	2.99387	3.17447	2.97568	3.6223	3.27517	1.51731	1.45358	1.93048
ENSMUSG00000017412	0.0584229	0.0559223	0.077826	0.0830502	0.0366808	0.0730367	0.0515845	0.0616898	0.0748647
ENSMUSG00000017417	0.592337	0.555048	0.633722	0.446293	0.303648	0.439131	0.570908	0.659009	0.664235
ENSMUSG00000017418	0.307439	1.75817	3.88377	0.656881	0.66972	3.44525	1.7748	2.005	0.778043
ENSMUSG00000017421	29.1038	28.7442	30.2329	26.2199	24.9391	26.8717	22.7269	23.7635	31.2454
ENSMUSG00000017428	25.6157	17.4413	17.9716	21.605	17.426	15.0608	18.5336	18.5212	19.8017
ENSMUSG00000017446	1.22547	1.24613	1.15384	1.66249	2.57596	2.52532	0.347094	0.615314	0.631983
ENSMUSG00000017453	0.104927	0	0	0.0843455	0.0457081	0	0.0836424	0	0.0851819
ENSMUSG00000017466	128.936	125.95	122.237	160.416	152.904	154.526	144.136	147.49	164.059
ENSMUSG00000017478	13.9945	18.0515	18.3659	12.1317	13.706	13.7191	8.30455	10.2871	13.0505
ENSMUSG00000017485	11.0453	12.7828	12.7106	12.5258	13.9613	13.2992	10.4058	12.4021	9.86705
ENSMUSG00000017491	0.010036	0	0	0	0	0	0	0	0
ENSMUSG00000017493	263.338	236.442	233.698	185.251	77.2187	79.007	85.4241	76.9572	100.582
ENSMUSG00000017499	15.8586	14.4923	13.0779	13.8377	12.7495	11.8823	14.1873	13.7734	12.2537
ENSMUSG00000017548	38.7053	17.8432	38.3152	37.2765	38.0285	35.5719	18.3167	23.1274	37.312
ENSMUSG00000017550	6.91005	8.8767	8.81407	6.8141	7.85602	7.56735	7.73177	10.1504	8.20103
ENSMUSG00000017561	13.0499	11.6149	13.3252	10.3081	10.8413	9.99999	13.8413	13.9839	10.0935
ENSMUSG00000017588	0	0	0	0.087082	0.086746	0	0	0	0
ENSMUSG00000017607	40.1045	57.8412	49.5143	48.0942	59.7106	60.8391	10.5839	15.6354	19.169
ENSMUSG00000017615	16.7981	48.7939	48.2416	44.0982	46.7069	46.2567	14.2957	43.4885	46.1505
ENSMUSG00000017631	2.85896	3.7928	3.48743	3.01931	3.61979	3.6508	2.16127	2.55095	2.45406
ENSMUSG00000017639	1.64347	2.66752	2.15863	1.46996	1.5238	1.67373	0.913606	1.51254	1.17404
ENSMUSG00000017652	1.4775	1.50235	1.61578	1.29896	1.72696	1.38723	0.58869	0.31157	0.409724
ENSMUSG00000017664	8.53427	8.01134	7.79911	8.27032	8.69034	9.21039	9.79984	11.0864	10.6706
ENSMUSG00000017667	3.915	4.77961	4.77629	3.46232	4.23871	3.9624	3.27139	4.41	4.24577
ENSMUSG00000017670	10.677	12.0867	11.7324	10.7281	12.8626	6.76641	7.81236	9.27666	10.403
ENSMUSG00000017677	49.4392	46.6707	51.3344	56.4927	47.3732	46.8398	84.5645	72.2894	54.1119
ENSMUSG00000017679	1.04975	1.82377	1.2245	0.924759	1.36022	2.40921	0.704106	1.21471	0.945949
ENSMUSG00000017686	12.0575	10.7247	10.1257	11.9086	11.9756	11.5392	15.013	14.8828	12.7398
ENSMUSG00000017688	0.235553	0.0163235	0.34537	0.241516	0.23852	0.277806	0.0197082	0.0323444	0.0342795
ENSMUSG00000017692	0.0111614	0	0	0	0	0	0	0.0348622	0
ENSMUSG00000017697	8.47473	8.62177	8.69798	6.59343	5.82557	6.08248	2.90404	2.1106	3.2719
ENSMUSG00000017707	128.349	105.797	112.155	144.763	130.263	129.302	113.145	100.077	101.325
ENSMUSG00000017713	0.161083	0.112219	0.0796967	0.213442	0.215081	0.236667	0.18539	0.0861006	0.106142
ENSMUSG00000017715	10.0044	10.7551	10.1721	9.90578	12.2568	11.4502	11.0364	11.4227	9.34122
ENSMUSG00000017716	33.7915	28.7402	27.7333	30.8039	23.0805	24.4053	31.277	26.434	22.2174
ENSMUSG00000017718	1.31434	1.23804	1.58566	1.63121	2.58531	1.75444	3.60966	3.92467	1.60385
ENSMUSG00000017720	0	0.07634	0.071269	0.103616	0.063918	0.445028	0.021636	0.120472	0
ENSMUSG00000017721	20.1194	22.9903	21.1455	22.2111	21.4208	21.7759	17.6105	16.291	26.5856
ENSMUSG00000017723	1.17553	1.26255	0.869096	0.24404	0.250682	0.128135	0.600509	0.668549	0.4282
ENSMUSG00000017724	24.4271	23.345	21.9099	24.5646	24.3132	23.144	19.3125	20.9333	24.4156
ENSMUSG00000017734	7.44542	6.44894	3.28639	8.42402	8.88448	7.53217	4.28975	5.73867	7.50712
ENSMUSG00000017737	0.0545355	0.0244777	0.0249945	0.0288118	0	0.0591731	0.0749257	0.280526	0.430782
ENSMUSG00000017740	0.124776	0.138244	0.0781948	0.0833656	0.0932077	0.157203	0.069834	0.0624	0.0301002
ENSMUSG00000017747	4.20442	4.36237	5.0357	4.01903	3.33559	5.39628	3.94485	4.05507	3.13075
ENSMUSG00000017754	0.00623315	0.0998639	0	0.0221392	0.102422	0.0360755	0	0.112118	0.0848365
ENSMUSG00000017756	3.08968	4.11738	4.3376	3.30863	3.93863	4.13415	2.09438	3.42198	3.02875
ENSMUSG00000017760	50.3425	47.7438	43.8379	44.388	47.1976	47.2263	37.5333	38.4193	45.6906
ENSMUSG00000017764	4.2576	4.37363	4.42799	4.38225	4.23065	4.66354	5.02818	4.08346	6.43238
ENSMUSG00000017765	13.2176	16.368	14.351	12.4638	14.5591	13.7416	8.96888	10.7043	9.05304
ENSMUSG00000017767	0	0	0	0	0.0393843	0	0	0	0
ENSMUSG00000017774	52.1646	63.1124	62.2725	57.8617	65.9258	68.031	32.4072	38.1831	42.8396
ENSMUSG00000017776	44.8664	36.4931	41.056	47.4485	46.5369	43.8182	12.0833	39.9902	27.7669
ENSMUSG00000017778	138.86	134.01	136.541	115.273	117.104	125.909	106.188	97.4514	89.6826
ENSMUSG00000017781	28.6566	32.491	30.1129	27.3743	24.328	32.355	30.2026	27.6915	26.0334
ENSMUSG00000017801	15.9679	12.8473	11.769	13.9323	16.7166	14.2186	11.7343	12.2467	12.5418
ENSMUSG00000017802	18.2446	15.7524	16.9175	20.6172	20.1613	20.2513	21.2611	23.0976	19.9337
ENSMUSG00000017817	0.0182335	0.0409343	0.0788491	0.0122401	0.0105329	0.0816409	0	0.0298471	0.105902
ENSMUSG00000017830	0.160946	0.137174	0.277414	0.271991	0.160495	0.321353	0.0946432	0.0882293	0.137767
ENSMUSG00000017831	15.6162	12.914	13.2762	17.9821	14.3747	15.2728	24.7674	21.3409	17.1773
ENSMUSG00000017832	0	0.0599777	0	0.215221	0	0.064099	0	0	0
ENSMUSG00000017837	12.6748	12.5929	12.7706	13.3913	5.56927	15.5115	17.0166	16.2104	17.5857
ENSMUSG00000017843	10.9031	10.7056	9.92331	11.954	9.95367	10.2047	9.6009	9.18454	8.13633
ENSMUSG00000017858	12.7629	11.7995	11.4003	13.0062	10.1867	10.4515	15.1263	12.9324	15.6351
ENSMUSG00000017861	29.5769	31.8923	33.2839	22.2715	25.3559	26.503	20.4409	24.5217	25.766
ENSMUSG00000017868	0.0304271	0.0638091	0.0497471	0.0147129	0	0	0	0	0
ENSMUSG00000017897	0.0517264	0	0	0	0	0	0.0697252	0	0.104512
ENSMUSG00000017929	54.9178	69.7025	69.4863	53.9935	72.1282	71.7743	23.4875	29.1609	28.5647
ENSMUSG00000017943	0.0145756	0	0	0	0	0	0.0401794	0.0659424	0
ENSMUSG00000017950	1.60128	1.5666	1.95265	0.7085	0.876733	0.762653	0.202162	0.330329	0.294038
ENSMUSG00000017969	0.0816101	0.0677917	0.209647	0.0202894	0.0523787	0	0.383638	0.289259	0.471869
ENSMUSG00000017978	0	0	0	0	0	0	0.00541832	0	0
ENSMUSG00000017999	31.2179	36.5536	34.1234	31.3608	31.537	32.8681	30.2544	31.1332	35.7461
ENSMUSG00000018001	4.00224	3.87719	3.33572	3.86801	3.50903	3.68697	3.40421	3.28624	3.9136
ENSMUSG00000018008	0.6511	0.815492	1.00064	0.789956	0.822584	0.630309	0.84158	0.796438	0.841937
ENSMUSG00000018012	1.15879	1.29062	1.32065	1.44953	1.23408	1.06359	1.69884	0.839617	1.46558
ENSMUSG00000018040	12.5099	14.2439	12.3887	10.3943	11.7589	10.1672	10.0524	11.2038	12.8893
ENSMUSG00000018042	28.4926	29.1014	27.9277	37.1524	38.8367	39.5254	30.8601	33.4793	40.9688
ENSMUSG00000018068	4.98399	5.48141	5.65486	4.32204	5.36035	4.53874	2.77857	3.33273	3.28453
ENSMUSG00000018076	2.76336	5.29308	4.67183	4.16632	5.82929	6.58647	3.19261	5.45444	5.47942
ENSMUSG00000018102	8.39547	7.48486	6.79275	10.3899	9.91602	6.83808	10.3213	8.67725	6.30489
ENSMUSG00000018126	0.0290536	0.0899239	0.122232	0	0.0319908	0	0	0	0
ENSMUSG00000018143	22.6741	21.0086	22.3759	29.525	29.55	30.0562	28.4955	30.5127	25.5166
ENSMUSG00000018160	6.43804	8.93818	8.33091	6.088	4.10743	7.49834	6.93196	8.788	9.25381
ENSMUSG00000018166	4.33109	4.78509	5.03458	7.0161	9.51656	9.80889	10.0508	12.0761	13.4347
ENSMUSG00000018167	6.60664	6.48232	6.53124	6.3754	5.76753	6.80351	6.22794	5.8373	5.90912
ENSMUSG00000018168	0.00603608	0	0	0	0.0051197	0.0106318	0	0	0
ENSMUSG00000018169	0.0432525	0.0295799	0.0474041	0.0535759	0	0.147526	0.0527782	0	0
ENSMUSG00000018171	27.5754	16.2415	18.102	27.208	22.1382	21.8228	26.5265	19.0522	13.1195
ENSMUSG00000018189	27.1997	19.5118	21.7888	22.3936	17.5042	18.2036	15.1181	12.3335	10.2982
ENSMUSG00000018196	2.77313	1.99829	2.61818	3.05881	1.70533	1.71953	3.00483	3.08264	1.42941
ENSMUSG00000018199	6.97566	7.64673	8.62727	6.20735	8.06759	7.48476	7.16118	8.37145	7.00524
ENSMUSG00000018209	25.5506	27.6067	27.182	23.8928	24.8367	24.7205	22.3784	25.8886	25.4715
ENSMUSG00000018217	48.5461	48.0233	44.6524	64.2103	60.2117	60.8746	33.7579	83.7648	95.0118
ENSMUSG00000018238	0.0260157	0	0	0.051108	0	0.0687387	0	0.0209422	0
ENSMUSG00000018239	19.5329	14.6186	17.2493	19.759	19.058	16.0525	25.9378	18.2729	18.5004
ENSMUSG00000018263	0	0	0	0	0	0.00995408	0	0	0
ENSMUSG00000018286	52.8379	48.7177	55.2688	49.0385	44.998	44.517	56.1887	52.5941	31.733
ENSMUSG00000018287	27.9088	25.0115	22.8813	24.6634	20.2642	20.2391	17.222	16.0476	16.7304
ENSMUSG00000018293	348.969	246.89	249.77	270.284	221.128	219.992	237.015	175.924	203.804
ENSMUSG00000018322	33.3573	30.438	27.8702	30.8818	29.055	29.7538	27.295	25.7415	34.5968
ENSMUSG00000018326	119.546	89.0648	91.9045	122.766	101.479	105.305	139.229	120.751	101.31
ENSMUSG00000018334	0.412729	0.530923	0.657536	0.401191	0.518015	0.523789	0.294508	0.333191	0.40325
ENSMUSG00000018339	0.0401665	0.130235	0.140949	0.234599	0.136558	0.355085	0.0344501	0.0459429	0.461307
ENSMUSG00000018340	53.2537	46.4478	43.8701	56.2959	57.2006	55.1267	48.7242	54.9607	48.1704
ENSMUSG00000018347	3.29565	2.28949	2.83682	3.22356	2.87651	3.3993	4.78486	4.8754	4.01599
ENSMUSG00000018362	139.325	136.923	127.007	104.374	97.6511	97.7166	91.3522	78.0385	81.9191
ENSMUSG00000018363	11.8144	12.903	13.7925	14.9899	16.7864	15.4587	12.7184	13.684	15.1186
ENSMUSG00000018372	2.65793	2.85957	2.53316	2.68755	3.06674	2.99469	3.63013	3.11655	3.03093
ENSMUSG00000018377	18.8378	18.7226	18.4507	24.7912	26.6947	24.6595	32.9117	31.0534	40.9177
ENSMUSG00000018378	2.55703	3.47969	2.98017	3.13981	3.38173	3.88443	3.26728	4.14832	4.56042
ENSMUSG00000018379	32.0419	19.0703	18.6034	18.6382	24.0579	17.1897	22.7938	21.1335	18.2621
ENSMUSG00000018381	3.25197	3.14472	3.42769	2.0561	3.11835	2.83871	1.94865	2.2756	3.01912
ENSMUSG00000018387	2.04225	1.73006	2.30767	1.93194	2.12922	2.55953	0.984532	1.50786	1.37703
ENSMUSG00000018395	7.86079	9.36555	7.81978	7.78167	6.88492	8.67185	8.15842	7.99647	9.01135
ENSMUSG00000018398	11.3275	11.7435	12.2836	15.7177	15.512	16.2273	11.1611	16.1115	29.3136
ENSMUSG00000018401	8.05242	8.62545	8.64903	7.99505	8.84142	8.15263	4.94759	9.00569	7.34158
ENSMUSG00000018405	4.24088	3.06245	3.18698	5.11315	4.63606	4.6337	5.93399	5.19399	5.14189
ENSMUSG00000018411	0.0879487	0.103543	0.144919	0.0665271	0.0945518	0.178449	0.0765484	0.0167842	0.0836716
ENSMUSG00000018412	9.34381	11.0345	9.89951	9.97551	8.43397	11.1506	9.0932	10.719	11.9763
ENSMUSG00000018415	11.6397	11.2541	11.2756	15.0264	14.3516	13.5354	14.4492	14.5156	15.0759
ENSMUSG00000018417	8.86682	9.19558	9.16019	8.41933	8.15448	9.0004	11.2723	11.9001	10.834
ENSMUSG00000018425	7.57596	6.75833	7.42803	7.97872	7.38672	7.26064	11.659	12.0874	10.1081
ENSMUSG00000018427	3.60501	3.71105	4.07836	4.3567	4.95042	4.21159	4.15259	4.17904	4.55498
ENSMUSG00000018428	21.1142	25.9545	24.6726	17.8495	18.5175	19.6644	18.0764	20.9335	21.9472
ENSMUSG00000018433	13.7539	12.8601	13.0377	10.1398	10.1796	11.4269	11.0538	11.1828	10.1544
ENSMUSG00000018442	6.0796	5.70071	6.06423	5.59023	5.49873	5.80276	6.88267	6.61244	5.67043
ENSMUSG00000018446	88.3028	61.6664	60.8709	72.0781	58.1675	53.6582	76.2699	52.133	46.6701
ENSMUSG00000018449	3.03653	2.9532	3.06192	2.71876	2.03655	1.86796	2.33274	1.75738	1.7078
ENSMUSG00000018451	0.18475	0.096887	0	0.055146	0.185202	0.084274	0.14619	0.067598	0.19969
ENSMUSG00000018459	0.0194438	0	0.0172044	0	0.0343771	0	0	0	0
ENSMUSG00000018470	0.119878	0.121587	0.0234869	0.248249	0.187668	0.096886	0.311369	0.0445368	0.125427
ENSMUSG00000018474	28.1271	40.5264	39.5207	29.0463	35.327	38.214	17.2236	25.1074	28.1026
ENSMUSG00000018476	3.43257	4.76091	5.35042	4.40679	5.7984	5.35742	7.01857	10.0116	14.0835
ENSMUSG00000018479	0	0	0.350365	0.0523455	0	0	0.0904273	0	0
ENSMUSG00000018481	18.6145	18.2853	17.947	16.8081	16.2581	16.8167	19.5084	19.5984	20.1605
ENSMUSG00000018500	0.028639	0	0	0	0	0	0	0	0
ENSMUSG00000018501	10.768	14.8533	13.7854	11.1992	14.0271	16.1801	9.60534	13.9021	17.1906
ENSMUSG00000018507	0	0.0387661	0	0.0111243	0	0	0	0	0.0301518
ENSMUSG00000018509	14.2037	16.4245	12.7011	13.8258	15.3157	12.7282	14.8555	17.1855	20.9977
ENSMUSG00000018537	10.2841	8.25944	6.79097	7.23754	8.94429	5.24718	6.81294	9.38659	8.76716
ENSMUSG00000018541	6.15204	5.83526	5.95204	5.61555	5.28068	5.70565	7.16636	6.92535	6.93778
ENSMUSG00000018543	0.218118	0	0	0	0.136867	0.089088	0	0.067922	0
ENSMUSG00000018547	12.2825	16.0311	14.1652	10.6188	11.806	12.859	11.0429	13.5359	15.2467
ENSMUSG00000018548	6.8344	5.88949	6.08586	5.44109	5.58653	5.93941	4.33589	4.83811	5.3556
ENSMUSG00000018554	0.0229995	0	0	0	0	0	0	0	0
ENSMUSG00000018559	42.8323	41.6303	38.5916	35.4242	31.6392	35.8727	36.029	34.1217	36.7739
ENSMUSG00000018565	28.0868	23.3927	22.0092	26.5125	23.7223	20.1338	27.5453	17.8668	17.8235
ENSMUSG00000018566	0.2761	0.406476	0.551188	0.637234	0.562967	0.344462	0.14984	0.336167	0.159217
ENSMUSG00000018567	102.063	87.9526	77.5532	94.2588	69.0739	70.9828	132.031	92.6338	124.002
ENSMUSG00000018569	0.0261696	0	0	0.0266424	0.0374287	0	0.0266075	0	0
ENSMUSG00000018570	0.322622	0.419694	0.374147	0.408847	0.612111	0.613868	0.517664	0.26704	0.904137
ENSMUSG00000018572	20.9831	18.7768	16.6897	16.8877	12.4749	15.4007	15.8729	13.8497	14.7492
ENSMUSG00000018574	16.3252	14.9096	16.855	16.5902	17.7449	17.1961	15.0553	17.5105	10.5139
ENSMUSG00000018581	0.0441431	0.154017	0.0403891	0.0266218	0.0092999	0.0218681	0	0	0.00311749
ENSMUSG00000018583	52.5119	53.538	56.3522	48.6978	54.3438	51.1358	37.8434	42.7955	33.7769
ENSMUSG00000018585	129.341	89.3894	93.9865	112.103	99.873	97.8642	50.4118	42.2769	23.441
ENSMUSG00000018589	0	0	0.042674	0	0	0	0	0	0
ENSMUSG00000018593	51.1635	50.72	51.419	52.9038	52.2804	52.1715	39.8244	39.1156	40.2604
ENSMUSG00000018595	0.0308865	0	0	0.025613	0.0171631	0	0	0	0
ENSMUSG00000018599	2.04227	1.19098	1.73237	1.45515	1.71937	2.32909	2.0427	2.64924	1.88944
ENSMUSG00000018604	21.438	20.8682	20.944	26.5742	25.0224	31.7106	24.9424	23.7263	26.9177
ENSMUSG00000018620	0.128544	0.039742	0	0.052892	0	0.026509	0	0	0
ENSMUSG00000018623	25.3599	19.5942	22.8808	12.5411	10.812	11.4789	0	0	0
ENSMUSG00000018648	5.408	3.63847	5.43745	5.50193	5.52058	4.53288	7.25055	3.53665	7.0927
ENSMUSG00000018651	8.37347	7.48538	8.57592	6.26277	6.34553	5.94048	6.00564	6.47163	6.81445
ENSMUSG00000018654	0	0	0	0.00901581	0	0	0	0	0
ENSMUSG00000018659	3.98944	3.36535	3.49278	3.0326	2.64123	2.91544	4.08721	5.23295	1.482
ENSMUSG00000018661	5.81956	6.30081	5.59289	5.33283	7.4371	7.31944	5.22096	6.29155	7.31334
ENSMUSG00000018666	18.9617	14.7063	16.6129	17.3124	7.24863	14.0789	19.3017	16.6818	14.5398
ENSMUSG00000018669	4.89142	5.35127	5.19607	5.95917	5.00158	5.78119	7.2127	9.37817	6.37013
ENSMUSG00000018672	2.50845	1.3982	0.980567	3.47578	2.19779	2.27474	5.51946	4.0501	4.11276
ENSMUSG00000018677	32.7245	35.2241	28.6321	31.2939	32.3923	32.9137	43.8088	43.2827	55.5833
ENSMUSG00000018678	5.44285	7.23664	7.01135	6.48293	7.48966	6.87605	6.05534	6.93548	10.7147
ENSMUSG00000018697	26.0238	26.5216	23.2848	22.8144	22.4537	22.0388	18.4371	16.9899	18.9392
ENSMUSG00000018698	0	0	0	0	0.0220134	0	0	0	0
ENSMUSG00000018707	28.748	49.954	49.6968	35.5264	54.3946	57.9502	22.2691	41.0036	40.2243
ENSMUSG00000018727	0.202778	0.313154	0.251915	0.175408	0.17507	0.133872	0.0783603	0.111213	0.255162
ENSMUSG00000018733	5.0344	4.10723	3.59574	3.46944	2.11711	3.74914	5.15843	4.35693	4.53441
ENSMUSG00000018736	16.8968	16.7104	15.9394	17.4471	18.469	17.0407	20.2925	21.6948	18.5391
ENSMUSG00000018740	0.324097	0.421034	0.543653	0.2894	0.231593	0.182639	0.213452	0.156591	0
ENSMUSG00000018750	0.957321	4.64828	6.45679	2.35272	5.48664	5.74704	6.87049	5.63627	10.0166
ENSMUSG00000018752	4.36725	3.53284	4.00972	4.03944	2.20673	2.72528	2.26927	2.12679	1.40986
ENSMUSG00000018761	13.1987	11.4934	11.1178	12.7818	12.7523	12.6187	16.5183	13.8668	14.4295
ENSMUSG00000018765	32.9262	35.7511	33.0788	29.7293	32.2295	35.6768	24.276	27.2195	24.7255
ENSMUSG00000018770	138.438	78.1718	103.125	100.708	81.0308	80.4942	83.3569	65.4702	34.8414
ENSMUSG00000018774	13.1159	14.8665	15.3799	19.6182	19.6507	21.4593	9.7711	8.87417	14.0494
ENSMUSG00000018776	0.116371	0.080736	0	0	0.0277	0.057422	0.160172	0.342483	0.279837
ENSMUSG00000018796	18.5833	20.8028	18.1246	25.3946	15.4882	13.8087	9.347	5.79082	10.2337
ENSMUSG00000018800	9.44324	10.8361	10.2413	10.6541	11.1531	12.01	12.8926	16.5974	12.8724
ENSMUSG00000018809	3.69756	3.82813	4.18645	3.26141	4.279	3.90327	2.43983	3.55751	2.29145
ENSMUSG00000018819	0.0294504	0.10182	0.0173405	0.117523	0.0513641	0.0373604	0	0	0.0260448
ENSMUSG00000018820	2.65661	3.26128	2.69014	3.91542	4.79484	4.30304	3.09067	4.1528	2.96256
ENSMUSG00000018821	62.7734	55.8258	57.7228	50.9875	51.7782	48.4831	59.1188	55.2511	44.8929
ENSMUSG00000018822	0.02781	0	0	0	0	0.015483	0	0	0
ENSMUSG00000018830	0.0139064	0.0140426	0	0	0.00589832	0.0241509	0.00658089	0	0
ENSMUSG00000018841	5.48391	3.62267	5.07555	3.95644	4.8607	3.38383	2.46528	2.35649	1.94348
ENSMUSG00000018844	0.090607	0.029345	0.015697	0	0.126124	0.132771	0.128109	0.235326	0.025402
ENSMUSG00000018845	0.0352804	0	0.0399379	0	0.0199505	0.0607024	0	0	0.0401311
ENSMUSG00000018846	22.3572	22.9204	24.664	21.0445	23.0331	22.528	16.6948	19.3261	15.3325
ENSMUSG00000018848	71.3642	67.5831	64.5684	66.7682	61.802	59.4401	84.8002	73.7991	77.5294
ENSMUSG00000018849	20.0377	26.0054	28.4745	24.0647	30.3277	27.7889	13.5194	16.8742	17.8097
ENSMUSG00000018858	5.00282	3.87361	3.81806	4.2515	2.94163	2.83799	3.21228	2.74314	1.73581
ENSMUSG00000018861	3.08213	2.59507	3.47449	2.9126	2.8742	3.47487	3.22899	2.51239	2.60939
ENSMUSG00000018862	0	0	0.0554744	0	0	0.0942224	0.0213647	0.0350641	0
ENSMUSG00000018865	0	0.0173346	0	0	0	0	0	0	0
ENSMUSG00000018882	27.1171	20.0187	21.6645	22.6635	18.556	20.5479	27.3502	28.4897	22.2846
ENSMUSG00000018893	0	1.82476	2.95631	0	3.30498	5.4749	0	2.18683	3.15179
ENSMUSG00000018899	15.8919	9.00495	17.4604	20.1486	10.6366	20.3122	11.0653	20.9306	13.4765
ENSMUSG00000018900	2.84164	2.25169	2.82208	3.4162	2.57181	2.50203	4.21927	5.21	3.46
ENSMUSG00000018906	10.3498	8.98001	9.35628	11.0086	11.7827	12.8087	24.4044	24.3183	21.6899
ENSMUSG00000018907	0	0	0	0	0.0317191	0	0	0	0
ENSMUSG00000018909	0.525062	3.23034	2.61365	0.752182	2.73568	2.71306	1.37714	2.08399	2.29645
ENSMUSG00000018914	0	0.179556	0.290614	0	0	0	0	0	0
ENSMUSG00000018916	37.0574	34.2652	27.1686	69.1191	64.8256	58.5708	8.55836	5.09963	10.5914
ENSMUSG00000018919	0.0898009	0	0	0	0	0.201001	0	0	0
ENSMUSG00000018920	80.65	83.7482	81.67	84.2192	86.8416	91.3523	31.4012	30.7128	36.8566
ENSMUSG00000018921	23.2972	30.4115	27.8957	20.6169	25.3591	26.2531	16.2948	19.4925	19.7772
ENSMUSG00000018923	17.8954	17.2172	18.2517	17.5534	15.146	14.3045	16.3148	14.6361	12.4488
ENSMUSG00000018924	0.0861262	0	0	0	0.0360133	0.10128	0	0	0.0104449
ENSMUSG00000018925	0	0	0.143552	0	0	0	0	0	0
ENSMUSG00000018927	0	0	0	0.0145083	0	0	0	0	0.0753381
ENSMUSG00000018931	6.71474	7.48918	6.25918	7.85528	9.26843	8.14536	11.1134	14.1359	16.0708
ENSMUSG00000018932	13.8595	11.7641	12.1972	14.7718	14.8098	15.4443	15.0846	22.0461	12.088
ENSMUSG00000018965	98.2599	83.491	83.565	92.814	74.8225	78.9896	81.352	63.9357	83.3482
ENSMUSG00000018974	7.47531	8.19371	10.613	5.95194	8.64812	8.48869	6.26994	8.01984	7.03582
ENSMUSG00000018983	1.8991	1.92598	2.21093	2.60671	3.32167	2.59158	5.39565	6.12468	6.09827
ENSMUSG00000018986	5.79558	8.96947	9.15647	7.00171	8.40343	9.18525	4.79634	6.21925	4.61223
ENSMUSG00000018995	1.61079	0.91582	1.46095	1.20996	1.58736	1.53992	1.4298	1.82755	1.38453
ENSMUSG00000018999	6.03628	5.37703	5.43182	4.35506	3.79408	4.0719	4.1729	3.70663	3.80957
ENSMUSG00000019027	0.00217203	0.0294912	0.0373005	0.0104196	0.0207622	0	0.0039742	0	0.00251786
ENSMUSG00000019039	4.38909	4.44732	4.88304	4.08047	4.47745	4.02334	2.96239	2.54903	2.74278
ENSMUSG00000019054	46.8889	40.7827	44.4099	43.3593	41.8284	39.4307	43.1716	36.5022	25.5583
ENSMUSG00000019055	0.875402	1.08216	1.29273	1.53986	1.31444	1.24399	1.14379	1.44008	1.04904
ENSMUSG00000019066	3.056	3.85768	3.83988	4.88995	4.87219	5.29212	7.04754	7.57436	7.2402
ENSMUSG00000019080	1.91749	1.78299	2.71618	2.04349	1.79284	1.97491	1.33638	1.31875	1.35534
ENSMUSG00000019082	4.63839	5.20088	4.99161	3.0643	4.03182	3.82086	3.74415	4.76168	4.63265
ENSMUSG00000019087	58.1551	56.2571	52.5374	59.8859	62.2446	54.8719	47.127	42.0738	45.383
ENSMUSG00000019088	3.59539	3.44593	3.76583	4.45315	4.56319	4.98458	7.07808	5.30426	3.70623
ENSMUSG00000019102	7.63966	8.50678	7.14419	6.78656	5.96107	6.2453	1.47644	1.13377	1.2997
ENSMUSG00000019122	0.0340334	0	0.110492	0	0.0656127	0	0	0	0.0444108
ENSMUSG00000019124	0	0.0151666	0	0	0.00994837	0.0162092	0.0447945	0.00673668	0
ENSMUSG00000019132	36.9351	33.84	32.9414	33.0892	32.2052	31.2259	31.6782	29.4974	25.7941
ENSMUSG00000019139	40.992	37.7596	38.3783	30.6754	30.9361	31.8771	23.6285	24.6953	19.6481
ENSMUSG00000019143	8.68175	6.71416	7.56152	8.61053	7.41165	6.80631	8.44545	7.9486	5.1683
ENSMUSG00000019158	14.5432	12.0069	11.1265	14.8614	15.7458	14.0028	14.3318	13.2144	8.73211
ENSMUSG00000019173	64.2012	54.8928	56.1848	46.9511	53.32	52.6126	44.7725	60.4939	49.9351
ENSMUSG00000019178	0	0	0.109143	0	0	0	0.0454305	0.0109992	0
ENSMUSG00000019179	140.74	127.692	124.691	118.802	115.764	116.859	108.082	100.891	102.8
ENSMUSG00000019188	28.3309	29.4592	26.8072	32.2334	35.4892	31.0893	31.691	30.3316	35.9579
ENSMUSG00000019189	19.1335	18.9833	18.827	19.4316	19.549	19.8449	9.26267	8.92289	7.99269
ENSMUSG00000019194	5.55262	5.19176	4.22076	6.59562	6.93096	6.38611	1.35902	0.654641	1.03263
ENSMUSG00000019210	42.0893	35.4886	36.7327	40.3485	34.9656	32.8444	43.3761	34.5026	33.5561
ENSMUSG00000019214	5.05027	5.48518	5.68055	4.27985	4.84117	5.20206	2.19696	2.96113	2.75173
ENSMUSG00000019230	0.0111308	0	0	0.0108369	0	0	0.00545944	0	0
ENSMUSG00000019232	0	0	0	0.00293	0	0.0168975	0.0250937	0.00516616	0.00818376
ENSMUSG00000019235	0.246713	0.0577009	0.156729	0.203069	0.184474	0.140976	0.151626	0.120536	0.119952
ENSMUSG00000019254	9.63672	8.73709	10.0788	9.22112	10.0753	7.97841	12.4288	13.7994	12.1155
ENSMUSG00000019256	8.43126	9.95745	9.84792	13.3703	14.3228	14.3802	18.3702	19.2702	20.6315
ENSMUSG00000019261	7.34148	8.70718	7.7298	6.50468	7.93387	7.87717	4.70452	5.28276	5.99182
ENSMUSG00000019278	0.0190843	0.0175156	0.0438421	0	0	0.0160334	0.00917695	0.0339169	0
ENSMUSG00000019295	10.1034	8.19767	10.0468	9.54698	9.60313	8.89614	9.00731	9.13166	9.49545
ENSMUSG00000019297	12.1463	12.3686	10.5572	9.9972	9.44778	9.92925	8.14826	8.43276	4.77266
ENSMUSG00000019301	0.038072	0	0.020817	0.019133	0	0	0.038709	0	0
ENSMUSG00000019302	15.6422	17.7575	16.646	16.406	19.1374	17.1973	10.0713	11.6133	11.2047
ENSMUSG00000019303	6.87223	8.14025	6.34946	5.95737	4.94754	7.17265	3.70416	2.69131	3.3671
ENSMUSG00000019312	27.7444	29.6255	29.1199	27.1094	28.9114	26.6552	18.002	19.5628	23.5938
ENSMUSG00000019320	8.7119	8.48524	8.60141	8.06941	7.84492	8.07554	1.19348	1.06259	1.05288
ENSMUSG00000019326	0.135119	0.0564711	0.102753	0.0394484	0.0619643	0.0948195	0.0448663	0.0276123	0.0873129
ENSMUSG00000019338	6.69778	10.2669	9.09444	7.15723	8.00231	6.95455	5.63714	7.61718	11.5168
ENSMUSG00000019359	0	0	0	0	0.00756315	0	0	0	0
ENSMUSG00000019362	83.736	75.8924	82.6912	86.776	70.1335	64.8255	97.6266	87.4599	72.7589
ENSMUSG00000019368	0.0984948	0.168493	0.115784	0.0637818	0.307163	0.122507	0.0713396	0.024266	0.0998004
ENSMUSG00000019370	103.031	109.096	108.393	86.0328	97.0765	95.4615	64.1318	67.3326	71.9074
ENSMUSG00000019373	16.3421	15.3073	16.7549	17.082	14.2714	14.189	21.448	18.0996	17.6199
ENSMUSG00000019428	35.1159	41.3428	39.7166	35.9235	37.302	38.8487	23.1857	24.9665	25.0362
ENSMUSG00000019429	0.113245	0	0.169833	0.0281684	0.0436992	0.0629207	0	0.0460064	0
ENSMUSG00000019432	44.6332	42.9461	40.8654	41.9649	40.004	42.4219	44.587	48.2766	48.3613
ENSMUSG00000019433	42.6182	43.1796	41.3814	40.6934	44.1266	41.4088	31.9897	29.9653	25.5575
ENSMUSG00000019437	4.97469	2.9483	4.54795	4.99033	3.2952	4.502	5.68443	3.4263	2.17519
ENSMUSG00000019461	27.156	25.6633	25.9872	29.3781	29.9899	28.8894	24.8481	23.8887	28.4938
ENSMUSG00000019464	0.791026	0.636835	0.729502	0.93146	0.716978	0.897353	0.430978	0.677395	0.469298
ENSMUSG00000019467	6.92908	6.13518	6.5474	7.98068	7.9619	7.98451	8.41839	7.61581	7.89461
ENSMUSG00000019470	10.1376	11.8092	11.772	8.9927	10.0931	10.3535	11.5273	12.9232	13.1344
ENSMUSG00000019471	36.7776	38.7988	36.8495	36.7666	36.4197	39.5494	29.9347	31.9581	32.0124
ENSMUSG00000019478	7.14127	7.31373	5.66024	6.63903	5.34682	6.16173	6.63635	5.01839	5.18792
ENSMUSG00000019487	35.1726	37.3919	37.6196	40.478	40.5217	39.6193	33.5108	32.216	37.6046
ENSMUSG00000019494	96.8305	77.1299	81.4808	85.362	74.9143	74.7874	81.9889	66.3696	55.5977
ENSMUSG00000019505	331.696	384.085	345.252	304.147	300.255	298.086	440.699	420.462	586.086
ENSMUSG00000019518	6.10427	7.09878	6.50083	6.81404	7.65682	8.01141	6.88852	7.38278	5.94325
ENSMUSG00000019528	9.371	7.50592	7.93293	8.33704	6.48067	7.14305	7.63915	6.47886	6.64687
ENSMUSG00000019539	0.060464	0	0	0	0	0.0813092	0.0842551	0.0123857	0
ENSMUSG00000019558	19.4376	21.2549	22.5225	18.0881	26.7089	20.4489	12.6194	13.3833	12.5503
ENSMUSG00000019564	1.713	2.18881	1.54725	2.32676	2.64462	2.3376	2.25	2.76069	2.29125
ENSMUSG00000019577	0.749336	0.883304	1.05702	1.26383	0.809788	1.15965	1.19676	1.08217	0.949626
ENSMUSG00000019578	4.5416	5.53037	4.78439	4.98609	5.86692	5.0152	4.37243	3.92956	4.42899
ENSMUSG00000019579	31.1087	27.7286	30.0157	28.8831	26.8262	29.3367	37.5772	37.1152	21.6799
ENSMUSG00000019590	6.49098	5.55038	5.68201	9.92922	8.80763	9.64158	11.8119	9.48864	7.73112
ENSMUSG00000019647	6.47011	4.36739	4.97518	3.34373	3.9808	7.00871	1.09807	2.36078	1.96919
ENSMUSG00000019659	7.97738	6.82827	7.42894	6.8156	7.58414	7.6725	5.88043	5.60037	4.52293
ENSMUSG00000019689	5.90207	2.83056	5.60831	6.27341	3.40501	4.00017	7.18949	5.70122	3.58889
ENSMUSG00000019699	0.536943	0.717898	0.943771	0.821115	0.688662	0.68684	2.43782	2.6673	2.80719
ENSMUSG00000019710	25.385	21.8418	20.9266	26.8612	19.9284	20.7343	36.681	27.2621	27.9654
ENSMUSG00000019715	9.30033	7.96916	8.1254	8.17604	7.64606	8.50828	8.22163	8.68586	7.82333
ENSMUSG00000019718	3.42789	3.69038	4.61047	4.00662	3.49362	4.02924	1.50617	1.71457	1.60211
ENSMUSG00000019726	2.66066	4.38076	4.39313	3.52108	4.97989	4.9762	1.95585	3.30268	3.48718
ENSMUSG00000019731	25.3302	27.9377	27.9864	27.0767	26.8381	28.2766	17.9382	21.2811	21.2966
ENSMUSG00000019732	0.627478	1.12708	0.584872	0.548265	0.713054	0.427363	0.449193	0.607761	0.845391
ENSMUSG00000019734	18.34	18.4211	16.4873	21.1089	20.9492	21.6133	1.08221	1.62546	1.10894
ENSMUSG00000019737	2.07362	2.11192	1.70283	1.29793	0.998122	1.47871	0.176047	0.141704	0.170555
ENSMUSG00000019738	8.06103	6.80223	4.51389	4.92335	5.47874	5.76014	8.0506	7.12775	5.97631
ENSMUSG00000019761	1.33198	1.12041	1.27866	1.22146	0.78179	1.93111	1.60663	1.79486	1.41994
ENSMUSG00000019762	0.362703	0.454465	0.165842	0.222489	0.0966517	0.147403	0.0958073	0	0
ENSMUSG00000019763	3.23525	2.67556	2.50372	3.48372	2.94832	3.20771	4.18333	2.86773	3.9666
ENSMUSG00000019767	0.469653	0.440169	0.6554	0.63616	0.64626	0.751865	0.101794	0.164617	0.289444
ENSMUSG00000019768	0.553663	0.358643	0.480892	1.03386	0.849059	0.713265	1.50992	1.42698	1.32415
ENSMUSG00000019772	0	0	0	0	0	0	0	0.012414	0
ENSMUSG00000019773	31.4137	28.1062	29.3397	37.4137	30.7129	33.4403	25.7676	22.1266	22.6589
ENSMUSG00000019774	2.99283	2.53901	2.4721	2.49131	2.96797	2.12885	4.12772	4.11461	3.53875
ENSMUSG00000019775	0	0	0	0.012553	0	0	0	0	0
ENSMUSG00000019777	33.5589	31.5213	27.949	34.1012	31.436	30.8002	32.1783	30.6082	26.8844
ENSMUSG00000019779	13.3716	12.3845	12.6298	13.1973	12.36	13.2864	9.44351	9.18833	9.36492
ENSMUSG00000019782	50.0782	35.1298	39.793	44.3184	34.5038	34.8251	40.5268	33.0587	29.618
ENSMUSG00000019785	0	0	0	0	0	0.0641079	0	0	0.00620991
ENSMUSG00000019787	0	0.00465609	0.0148037	0.00556917	0.00958502	0.018358	0	0	0.00482017
ENSMUSG00000019790	3.21732	3.96543	3.69082	3.64149	4.12778	4.05592	3.95633	4.06353	4.61541
ENSMUSG00000019791	1.7211	0.905042	1.04681	1.74219	1.43183	1.87719	0.906898	0.488261	0.223736
ENSMUSG00000019792	1.90838	1.10289	1.34534	1.49143	0.963441	1.11722	2.01786	1.42713	1.04949
ENSMUSG00000019794	15.5801	10.8767	14.6009	16.8637	13.5523	13.1523	15.8771	12.9961	9.81087
ENSMUSG00000019795	14.4229	13.0436	13.8317	17.3439	11.2798	10.7773	13.3566	13.559	12.8054
ENSMUSG00000019796	13.8892	13.8109	6.26585	6.70412	13.149	4.31283	4.80037	5.81159	10.334
ENSMUSG00000019797	3.20555	3.04348	2.59019	2.90625	2.36317	1.94221	3.8785	2.59278	4.63025
ENSMUSG00000019802	14.5827	14.2432	13.021	16.4518	15.7257	15.0803	21.7002	22.1886	22.0867
ENSMUSG00000019804	95.0377	84.1773	77.7021	55.7134	50.5551	75.9127	58.5139	72.0662	90.3152
ENSMUSG00000019806	1.6588	1.67036	1.90405	1.94771	1.9677	1.83873	1.75309	1.57905	1.50592
ENSMUSG00000019808	5.77813	6.17483	5.05174	5.55	4.82025	6.11947	6.27104	8.58958	7.38122
ENSMUSG00000019809	4.40756	3.70199	3.41594	4.09224	3.41363	2.55809	3.3591	2.77527	3.49303
ENSMUSG00000019810	7.61847	7.85134	7.52132	8.52779	7.42348	7.0567	5.27049	4.89163	4.37188
ENSMUSG00000019813	2.39829	3.02002	2.55151	3.09591	2.73307	3.06132	2.61074	2.26006	2.23697
ENSMUSG00000019814	24.6157	23.9564	21.0201	20.8574	16.6717	18.8373	21.4348	19.6042	21.4268
ENSMUSG00000019817	0	0	0	0	0.00462677	0	0	0	0
ENSMUSG00000019818	52.8977	48.3178	47.2966	55.1167	45.9037	47.9907	81.8862	69.2758	68.3225
ENSMUSG00000019820	2.86043	7.81004	7.8114	5.37413	8.72037	8.09775	7.66051	14.2382	14.7964
ENSMUSG00000019822	2.59827	1.76422	2.32857	2.01487	2.02181	2.17637	3.50847	3.42113	2.06773
ENSMUSG00000019823	0.252925	0.394531	0.167884	0.296123	0.493433	0.317028	0.0247175	0.0436204	0.00745425
ENSMUSG00000019826	2.88711	2.65923	2.41843	3.02112	2.60288	2.87578	3.48038	3.66879	3.13762
ENSMUSG00000019828	0	0	0	0	0.00583994	0	0	0	0
ENSMUSG00000019831	1.10373	1.04744	1.07134	1.0912	1.43847	1.11343	1.57221	1.68014	1.7885
ENSMUSG00000019832	12.2823	10.9849	9.94811	10.9569	9.09123	9.92518	5.45245	4.17762	4.73878
ENSMUSG00000019836	0.306067	0.273601	2.09078	0.051288	0.06451	0.047541	0.220444	0.130502	0.113939
[truncated: 27,784 more rows]
